# Supplementary material
Source: publisher figshare collection journal article supplement (https://acs.figshare.com/ndownloader/files/9320209)
Supplement: Supplementary file 1 [file 9320209]

data_exp_286
_audit_creation_date              2017-03-13
_audit_creation_method
;
Olex2 1.2
(compiled 2015.09.30 svn.r3233 for OlexSys, GUI svn.r5103)
;
_publ_contact_author_address      ?
_publ_contact_author_email        ?
_publ_contact_author_name         ''
_publ_contact_author_phone        ?
_publ_section_references
;
Dolomanov, O.V., Bourhis, L.J., Gildea, R.J, Howard, J.A.K. & Puschmann, H.
 (2009), J. Appl. Cryst. 42, 339-341.

Sheldrick, G.M. (2015). Acta Cryst. A71, 3-8.

Sheldrick, G.M. (2015). Acta Cryst. C71, 3-8.
;
_chemical_name_common             ?
_chemical_name_systematic         ?
_chemical_formula_moiety          'C17 H13 Br N2 O2'
_chemical_formula_sum             'C17 H13 Br N2 O2'
_chemical_formula_weight          357.20
_chemical_absolute_configuration  ad
_chemical_melting_point           ?
_chemical_oxdiff_formula          'C17 H13 Br N2 O2'
loop_
  _atom_type_symbol
  _atom_type_description
  _atom_type_scat_dispersion_real
  _atom_type_scat_dispersion_imag
  _atom_type_scat_source
 'C' 'C' 0.0033 0.0016 'International Tables Vol C Tables 4.2.6.8 and 6.1.1.4'
 'H' 'H' 0.0000 0.0000 'International Tables Vol C Tables 4.2.6.8 and 6.1.1.4'
 'Br' 'Br' -0.2901 2.4595
 'International Tables Vol C Tables 4.2.6.8 and 6.1.1.4'
 'N' 'N' 0.0061 0.0033 'International Tables Vol C Tables 4.2.6.8 and 6.1.1.4'
 'O' 'O' 0.0106 0.0060 'International Tables Vol C Tables 4.2.6.8 and 6.1.1.4'

_shelx_space_group_comment
;
The symmetry employed for this shelxl refinement is uniquely defined
by the following loop, which should always be used as a source of
symmetry information in preference to the above space-group names.
They are only intended as comments.
;
_space_group_crystal_system       'tetragonal'
_space_group_IT_number            78
_space_group_name_H-M_alt         'P 43'
_space_group_name_Hall            'P 4cw'
loop_
  _space_group_symop_operation_xyz
 'x, y, z'
 '-x, -y, z+1/2'
 '-y, x, z+3/4'
 'y, -x, z+1/4'

_cell_length_a                    14.4914(3)
_cell_length_b                    14.4914(3)
_cell_length_c                    14.4935(5)
_cell_angle_alpha                 90
_cell_angle_beta                  90
_cell_angle_gamma                 90
_cell_volume                      3043.63(18)
_cell_formula_units_Z             8
_cell_measurement_reflns_used     4894
_cell_measurement_temperature     100
_cell_measurement_theta_max       26.3540
_cell_measurement_theta_min       1.9630
_shelx_estimated_absorpt_T_max    ?
_shelx_estimated_absorpt_T_min    ?
_exptl_absorpt_coefficient_mu     2.709
_exptl_absorpt_correction_T_max   1.000
_exptl_absorpt_correction_T_min   0.768
_exptl_absorpt_correction_type    gaussian
_exptl_absorpt_process_details
;
CrysAlisPro 1.171.38.43b (Rigaku Oxford Diffraction, 2015)
Numerical absorption correction based on gaussian integration over
			a multifaceted crystal model
Empirical absorption correction using spherical harmonics,
 implemented in SCALE3 ABSPACK scaling algorithm.
;
_exptl_absorpt_special_details    ?
_exptl_crystal_colour             'clear light colourless'
_exptl_crystal_colour_lustre      clear
_exptl_crystal_colour_modifier    light
_exptl_crystal_colour_primary     colourless
_exptl_crystal_density_diffrn     1.559
_exptl_crystal_density_meas       ?
_exptl_crystal_density_method     ?
_exptl_crystal_description        irregular
_exptl_crystal_F_000              1440
loop_
  _exptl_crystal_face_index_h
  _exptl_crystal_face_index_k
  _exptl_crystal_face_index_l
  _exptl_crystal_face_perp_dist
 13 15 -3 0.0718
 1 0 1 0.0712
 -1 0 -1 0.0695
 1 5 -3 0.0724
 -2 -5 1 0.0151
 -5 2 2 0.0810
 5 -2 -1 0.0882
 1 -3 -5 0.0792
 3 17 11 0.0998

_exptl_crystal_size_max           0.22
_exptl_crystal_size_mid           0.151
_exptl_crystal_size_min           0.103
loop_
  _exptl_oxdiff_crystal_face_indexfrac_h
  _exptl_oxdiff_crystal_face_indexfrac_k
  _exptl_oxdiff_crystal_face_indexfrac_l
  _exptl_oxdiff_crystal_face_x
  _exptl_oxdiff_crystal_face_y
  _exptl_oxdiff_crystal_face_z
 13.0008 15.0000 -3.0000 -0.1816 0.8498 0.4604
 1.0001 -0.0000 1.0000 -0.0020 -0.0093 0.0686
 -1.0001 0.0000 -1.0000 0.0020 0.0093 -0.0686
 1.0001 5.0000 -3.0000 -0.0862 0.2742 -0.0350
 -2.0003 -5.0000 1.0000 0.1124 -0.2349 -0.0639
 -4.9996 2.0000 2.0000 -0.2319 -0.0981 -0.1246
 4.9997 -2.0000 -1.0000 0.2077 0.0681 0.1548
 0.9993 -3.0000 -5.0000 0.2518 0.0724 -0.1231
 3.0023 16.9999 10.9999 -0.8150 0.2885 0.5065

_exptl_transmission_factor_max    ?
_exptl_transmission_factor_min    ?
_diffrn_reflns_av_R_equivalents   0.1103
_diffrn_reflns_av_unetI/netI      0.2080
_diffrn_reflns_Laue_measured_fraction_full 0.994
_diffrn_reflns_Laue_measured_fraction_max 0.994
_diffrn_reflns_limit_h_max        17
_diffrn_reflns_limit_h_min        -17
_diffrn_reflns_limit_k_max        17
_diffrn_reflns_limit_k_min        -17
_diffrn_reflns_limit_l_max        17
_diffrn_reflns_limit_l_min        -16
_diffrn_reflns_number             19151
_diffrn_reflns_point_group_measured_fraction_full 0.942
_diffrn_reflns_point_group_measured_fraction_max 0.942
_diffrn_reflns_theta_full         26.000
_diffrn_reflns_theta_max          26.019
_diffrn_reflns_theta_min          1.987
_diffrn_ambient_environment       N~2~
_diffrn_ambient_temperature       100
_diffrn_detector                  'CCD plate'
_diffrn_detector_area_resol_mean  10.3590
_diffrn_detector_type             Atlas
_diffrn_measured_fraction_theta_full 0.994
_diffrn_measured_fraction_theta_max 0.994
_diffrn_measurement_details
;
List of Runs (angles in degrees, time in seconds):

  # Type    Start    End  Width  t~exp~   \w     \q     \k     \f   Frames
--------------------------------------------------------------------------
  1  \w    -11.00  68.00   1.00   22.50    --   18.69 -99.00-180.00   79
  2  \w    -15.00  68.00   1.00   22.50    --   18.69  19.00  30.00   83
  3  \w   -121.00 -41.00   1.00   22.50    --  -19.78-178.00-120.00   80
  4  \w   -112.00  22.00   1.00   22.50    --  -19.78 -57.00  90.00  134
;
_diffrn_measurement_device        'four-circle diffractometer'
_diffrn_measurement_device_type   'SuperNova, Single source at offset, Atlas'
_diffrn_measurement_method        '\w scans'
_diffrn_orient_matrix_type
'CrysAlisPro convention (1999,Acta A55,543-557)'
_diffrn_orient_matrix_UB_11       0.0222158000
_diffrn_orient_matrix_UB_12       -0.0362025000
_diffrn_orient_matrix_UB_13       -0.0242053000
_diffrn_orient_matrix_UB_21       0.0207131000
_diffrn_orient_matrix_UB_22       0.0327067000
_diffrn_orient_matrix_UB_23       -0.0299742000
_diffrn_orient_matrix_UB_31       0.0383980000
_diffrn_orient_matrix_UB_32       0.0034585000
_diffrn_orient_matrix_UB_33       0.0302161000
_diffrn_radiation_monochromator   mirror
_diffrn_radiation_probe           x-ray
_diffrn_radiation_type            MoK\a
_diffrn_radiation_wavelength      0.71073
_diffrn_source                    'micro-focus sealed X-ray tube'
_diffrn_source_type               'SuperNova (Mo) X-ray Source'
_diffrn_special_details           ?
_reflns_Friedel_coverage          0.820
_reflns_Friedel_fraction_full     0.887
_reflns_Friedel_fraction_max      0.886
_reflns_number_gt                 3296
_reflns_number_total              5623
_reflns_odcompleteness_completeness 99.94
_reflns_odcompleteness_iscentric  1
_reflns_odcompleteness_theta      25.97
_reflns_special_details
;
 Reflections were merged by SHELXL according to the crystal
 class for the calculation of statistics and refinement.
 
 _reflns_Friedel_fraction is defined as the number of unique
 Friedel pairs measured divided by the number that would be
 possible theoretically, ignoring centric projections and
 systematic absences.
;
_reflns_threshold_expression      'I > 2\s(I)'
_computing_cell_refinement        'CrysAlisPro 1.171.38.43b (Rigaku OD, 2015)'
_computing_data_collection        'CrysAlisPro 1.171.38.43b (Rigaku OD, 2015)'
_computing_data_reduction         'CrysAlisPro 1.171.38.43b (Rigaku OD, 2015)'
_computing_molecular_graphics     'Olex2 (Dolomanov et al., 2009)'
_computing_publication_material   'Olex2 (Dolomanov et al., 2009)'
_computing_structure_refinement   'ShelXL (Sheldrick, 2015)'
_computing_structure_solution     'ShelXT (Sheldrick, 2015)'
_refine_diff_density_max          0.821
_refine_diff_density_min          -0.521
_refine_diff_density_rms          0.091
_refine_ls_abs_structure_details
;
 Classical Flack method preferred over Parsons because s.u. lower.
;
_refine_ls_abs_structure_Flack    -0.029(15)
_refine_ls_extinction_coef        .
_refine_ls_extinction_method      none
_refine_ls_goodness_of_fit_ref    0.669
_refine_ls_hydrogen_treatment     constr
_refine_ls_matrix_type            full
_refine_ls_number_parameters      399
_refine_ls_number_reflns          5623
_refine_ls_number_restraints      1
_refine_ls_R_factor_all           0.0841
_refine_ls_R_factor_gt            0.0553
_refine_ls_restrained_S_all       0.669
_refine_ls_shift/su_max           0.001
_refine_ls_shift/su_mean          0.000
_refine_ls_structure_factor_coef  Fsqd
_refine_ls_weighting_details      'w=1/[\s^2^(Fo^2^)] where P=(Fo^2^+2Fc^2^)/3'
_refine_ls_weighting_scheme       calc
_refine_ls_wR_factor_gt           0.0889
_refine_ls_wR_factor_ref          0.1055
_refine_special_details           ?
_olex2_refinement_description
;
1. Fixed Uiso
 At 1.2 times of:
  All C(H) groups
 At 1.5 times of:
  All C(H,H,H) groups
2.a Ternary CH refined with riding coordinates:
 C00D(H00E), C00N(H00N)
2.b Aromatic/amide H refined with riding coordinates:
 C00C(H00D), C00F(H00F), C00I(H00I), C00L(H00L), C00M(H00M), C00T(H00T),
 C00W(H00W), C00X(H00X), C00Y(H00Y), C010(H010), C011(H011), C012(H012),
 C013(H013), C014(H014), C015(H015), C016(H016), C017(H017), C018(H018)
2.c Idealised Me refined as rotating group:
 C00E(H00G,H00H,H00J), C00V(H00A,H00B,H00C)
;
_atom_sites_solution_hydrogens    geom
_atom_sites_solution_primary      ?
_atom_sites_solution_secondary    ?
loop_
  _atom_site_label
  _atom_site_type_symbol
  _atom_site_fract_x
  _atom_site_fract_y
  _atom_site_fract_z
  _atom_site_U_iso_or_equiv
  _atom_site_adp_type
  _atom_site_occupancy
  _atom_site_site_symmetry_order
  _atom_site_calc_flag
  _atom_site_refinement_flags_posn
  _atom_site_refinement_flags_adp
  _atom_site_refinement_flags_occupancy
  _atom_site_disorder_assembly
  _atom_site_disorder_group
 Br01 Br 0.15425(7) 0.37224(7) 0.80210(8) 0.0328(3) Uani 1 1 d . . . . .
 Br02 Br 0.38816(7) 1.10287(7) 0.68754(8) 0.0333(3) Uani 1 1 d . . . . .
 O003 O 0.3216(4) 0.7041(4) 0.8225(4) 0.0232(16) Uani 1 1 d . . . . .
 O004 O 0.2834(4) 0.6123(5) 0.6351(5) 0.0274(17) Uani 1 1 d . . . . .
 O005 O 0.1926(4) 0.7934(4) 0.6936(5) 0.0254(16) Uani 1 1 d . . . . .
 O006 O 0.1994(4) 0.8928(5) 0.5045(5) 0.0316(18) Uani 1 1 d . . . . .
 N007 N 0.0985(6) 0.7743(5) 0.4683(6) 0.027(2) Uani 1 1 d . . . . .
 N008 N 0.3842(5) 0.7270(5) 0.5862(6) 0.0208(19) Uani 1 1 d . . . . .
 N009 N 0.4342(6) 0.8012(6) 0.6277(6) 0.028(2) Uani 1 1 d . . . . .
 N00A N 0.0536(5) 0.7005(6) 0.5176(6) 0.023(2) Uani 1 1 d . . . . .
 C00B C 0.4273(6) 0.7928(6) 0.7145(7) 0.020(2) Uani 1 1 d . . . . .
 C00C C 0.1945(6) 1.1416(6) 0.6839(7) 0.023(2) Uani 1 1 d . . . . .
 H00D H 0.2119 1.2045 0.6771 0.027 Uiso 1 1 calc R . . . .
 C00D C 0.1177(6) 0.8560(6) 0.7021(7) 0.022(2) Uani 1 1 d . . . . .
 H00E H 0.0690 0.8391 0.7480 0.027 Uiso 1 1 calc R . . . .
 C00E C 0.0411(6) 0.6442(6) 0.6742(7) 0.027(3) Uani 1 1 d . . . . .
 H00G H -0.0081 0.6718 0.7115 0.040 Uiso 1 1 calc GR . . . .
 H00H H 0.0940 0.6299 0.7138 0.040 Uiso 1 1 calc GR . . . .
 H00J H 0.0185 0.5874 0.6454 0.040 Uiso 1 1 calc GR . . . .
 C00F C 0.2919(6) 0.5098(6) 0.8082(7) 0.021(2) Uani 1 1 d . . . . .
 H00F H 0.2412 0.5512 0.8055 0.026 Uiso 1 1 calc R . . . .
 C00G C 0.2785(7) 0.4147(7) 0.8070(8) 0.033(3) Uani 1 1 d . . . . .
 C00H C 0.2606(6) 1.0742(7) 0.6858(8) 0.027(2) Uani 1 1 d . . . . .
 C00I C 0.3502(7) 0.3525(6) 0.8078(7) 0.028(2) Uani 1 1 d . . . . .
 H00I H 0.3390 0.2880 0.8057 0.034 Uiso 1 1 calc R . . . .
 C00J C 0.1493(6) 0.8287(6) 0.5269(7) 0.023(2) Uani 1 1 d . . . . .
 C00K C 0.3379(7) 0.6727(7) 0.6500(7) 0.023(2) Uani 1 1 d . . . . .
 C00L C 0.1314(6) 0.8452(7) 0.3204(7) 0.026(3) Uani 1 1 d . . . . .
 H00L H 0.1458 0.9011 0.3513 0.032 Uiso 1 1 calc R . . . .
 C00M C 0.2363(6) 0.9796(6) 0.6916(7) 0.023(2) Uani 1 1 d . . . . .
 H00M H 0.2823 0.9329 0.6919 0.028 Uiso 1 1 calc R . . . .
 C00N C 0.4000(6) 0.6455(6) 0.8174(7) 0.025(2) Uani 1 1 d . . . . .
 H00N H 0.4543 0.6650 0.8552 0.030 Uiso 1 1 calc R . . . .
 C00O C 0.1260(7) 0.7942(7) 0.6198(7) 0.023(2) Uani 1 1 d . . . . .
 C00P C 0.0697(6) 0.7099(7) 0.6019(7) 0.021(2) Uani 1 1 d . . . . .
 C00Q C 0.3715(6) 0.7268(7) 0.4876(7) 0.025(2) Uani 1 1 d . . . . .
 C00R C 0.1010(7) 0.7689(7) 0.3700(7) 0.027(3) Uani 1 1 d . . . . .
 C00S C 0.3823(6) 0.5422(6) 0.8134(7) 0.021(2) Uani 1 1 d . . . . .
 C00T C 0.3144(7) 0.6577(7) 0.3496(7) 0.030(3) Uani 1 1 d . . . . .
 H00T H 0.2846 0.6076 0.3195 0.035 Uiso 1 1 calc R . . . .
 C00U C 0.1427(6) 0.9571(6) 0.6967(7) 0.021(2) Uani 1 1 d . . . . .
 C00V C 0.4660(7) 0.8588(6) 0.7819(8) 0.034(3) Uani 1 1 d . . . . .
 H00A H 0.5126 0.8276 0.8198 0.051 Uiso 1 1 calc GR . . . .
 H00B H 0.4165 0.8820 0.8217 0.051 Uiso 1 1 calc GR . . . .
 H00C H 0.4947 0.9105 0.7490 0.051 Uiso 1 1 calc GR . . . .
 C00W C 0.0760(6) 1.0259(6) 0.6985(7) 0.024(2) Uani 1 1 d . . . . .
 H00W H 0.0126 1.0103 0.7043 0.029 Uiso 1 1 calc R . . . .
 C00X C 0.4558(6) 0.4818(7) 0.8162(7) 0.028(3) Uani 1 1 d . . . . .
 H00X H 0.5170 0.5047 0.8211 0.034 Uiso 1 1 calc R . . . .
 C00Y C 0.1028(6) 1.1184(6) 0.6916(7) 0.027(2) Uani 1 1 d . . . . .
 H00Y H 0.0572 1.1656 0.6923 0.033 Uiso 1 1 calc R . . . .
 C00Z C 0.3747(6) 0.7087(6) 0.7404(7) 0.022(2) Uani 1 1 d . . . . .
 C010 C 0.4048(6) 0.8017(6) 0.4376(8) 0.026(2) Uani 1 1 d . . . . .
 H010 H 0.4372 0.8503 0.4674 0.032 Uiso 1 1 calc R . . . .
 C011 C 0.3279(6) 0.6545(7) 0.4427(7) 0.027(2) Uani 1 1 d . . . . .
 H011 H 0.3074 0.6025 0.4769 0.032 Uiso 1 1 calc R . . . .
 C012 C 0.0778(7) 0.6870(7) 0.3274(8) 0.033(3) Uani 1 1 d . . . . .
 H012 H 0.0564 0.6357 0.3622 0.040 Uiso 1 1 calc R . . . .
 C013 C 0.3432(6) 0.7327(7) 0.2983(9) 0.036(3) Uani 1 1 d . . . . .
 H013 H 0.3314 0.7355 0.2339 0.043 Uiso 1 1 calc R . . . .
 C014 C 0.1404(7) 0.8387(8) 0.2257(8) 0.035(3) Uani 1 1 d . . . . .
 H014 H 0.1607 0.8906 0.1912 0.042 Uiso 1 1 calc R . . . .
 C015 C 0.4400(6) 0.3874(6) 0.8118(8) 0.028(3) Uani 1 1 d . . . . .
 H015 H 0.4908 0.3460 0.8116 0.034 Uiso 1 1 calc R . . . .
 C016 C 0.0867(7) 0.6816(8) 0.2307(8) 0.032(3) Uani 1 1 d . . . . .
 H016 H 0.0700 0.6264 0.1995 0.039 Uiso 1 1 calc R . . . .
 C017 C 0.1196(7) 0.7563(8) 0.1807(8) 0.041(3) Uani 1 1 d . . . . .
 H017 H 0.1281 0.7512 0.1159 0.050 Uiso 1 1 calc R . . . .
 C018 C 0.3896(7) 0.8037(8) 0.3421(7) 0.035(3) Uani 1 1 d . . . . .
 H018 H 0.4113 0.8546 0.3069 0.042 Uiso 1 1 calc R . . . .

loop_
  _atom_site_aniso_label
  _atom_site_aniso_U_11
  _atom_site_aniso_U_22
  _atom_site_aniso_U_33
  _atom_site_aniso_U_23
  _atom_site_aniso_U_13
  _atom_site_aniso_U_12
 Br01 0.0301(6) 0.0297(6) 0.0386(8) -0.0003(5) 0.0018(5) -0.0043(5)
 Br02 0.0307(6) 0.0312(6) 0.0382(8) 0.0044(6) -0.0018(5) -0.0053(5)
 O003 0.020(4) 0.030(4) 0.020(4) -0.002(3) -0.002(3) 0.007(3)
 O004 0.027(4) 0.025(4) 0.030(5) -0.002(3) -0.007(3) -0.003(3)
 O005 0.021(4) 0.024(4) 0.031(5) -0.001(3) -0.006(3) 0.001(3)
 O006 0.035(4) 0.030(4) 0.030(5) -0.007(3) 0.005(4) -0.009(4)
 N007 0.030(5) 0.023(5) 0.026(6) 0.004(4) 0.002(4) -0.006(4)
 N008 0.014(4) 0.023(4) 0.025(5) -0.002(4) -0.005(3) 0.008(4)
 N009 0.032(5) 0.029(5) 0.024(6) 0.000(4) 0.003(4) -0.002(4)
 N00A 0.024(5) 0.027(5) 0.020(5) -0.001(4) -0.002(4) -0.001(4)
 C00B 0.017(5) 0.018(5) 0.025(6) 0.004(4) -0.004(4) -0.003(4)
 C00C 0.033(6) 0.020(5) 0.015(6) -0.001(5) 0.003(5) 0.006(4)
 C00D 0.025(5) 0.029(6) 0.012(6) -0.013(4) -0.003(4) 0.006(4)
 C00E 0.027(6) 0.021(5) 0.033(7) 0.002(5) -0.002(5) 0.004(4)
 C00F 0.023(5) 0.022(5) 0.019(6) -0.003(4) 0.006(5) 0.007(4)
 C00G 0.027(6) 0.040(7) 0.032(7) -0.005(6) 0.011(6) 0.006(5)
 C00H 0.024(5) 0.029(6) 0.028(7) -0.006(5) -0.001(5) 0.005(4)
 C00I 0.036(6) 0.018(5) 0.030(7) -0.006(5) 0.009(6) 0.001(5)
 C00J 0.017(5) 0.020(5) 0.032(7) 0.000(4) 0.004(5) -0.001(4)
 C00K 0.022(5) 0.021(5) 0.025(7) 0.008(4) 0.004(5) 0.002(4)
 C00L 0.024(6) 0.038(6) 0.017(7) -0.003(5) -0.004(5) 0.001(5)
 C00M 0.028(5) 0.028(5) 0.013(6) 0.000(5) 0.004(5) 0.008(4)
 C00N 0.020(5) 0.030(6) 0.024(7) -0.005(5) -0.003(5) 0.001(5)
 C00O 0.021(5) 0.022(6) 0.027(7) 0.001(5) 0.006(5) 0.002(4)
 C00P 0.018(5) 0.023(5) 0.023(7) 0.006(5) -0.001(4) 0.006(4)
 C00Q 0.020(5) 0.030(6) 0.024(7) -0.001(5) 0.000(4) 0.001(5)
 C00R 0.021(6) 0.035(6) 0.025(7) -0.003(5) 0.007(5) -0.001(5)
 C00S 0.024(5) 0.024(5) 0.015(6) -0.003(4) -0.007(5) -0.003(4)
 C00T 0.024(6) 0.038(7) 0.027(7) -0.005(5) -0.003(5) 0.000(5)
 C00U 0.025(5) 0.026(5) 0.010(5) -0.004(4) -0.003(4) 0.000(4)
 C00V 0.044(7) 0.027(6) 0.030(7) -0.002(5) -0.010(5) -0.004(5)
 C00W 0.027(5) 0.022(5) 0.023(7) 0.004(5) 0.004(5) 0.000(4)
 C00X 0.028(6) 0.031(6) 0.026(7) 0.003(5) -0.008(5) -0.010(5)
 C00Y 0.031(6) 0.022(5) 0.028(7) 0.004(5) 0.010(5) 0.007(5)
 C00Z 0.024(5) 0.022(5) 0.020(6) -0.011(4) 0.001(4) 0.002(4)
 C010 0.027(5) 0.021(5) 0.031(7) 0.000(5) 0.006(5) 0.007(4)
 C011 0.031(6) 0.033(6) 0.016(6) -0.001(5) 0.003(5) -0.003(5)
 C012 0.031(6) 0.037(7) 0.032(7) -0.012(6) -0.014(5) 0.002(5)
 C013 0.024(6) 0.048(7) 0.036(8) -0.003(6) 0.003(6) 0.015(5)
 C014 0.033(7) 0.049(7) 0.023(7) 0.015(6) -0.004(5) 0.004(6)
 C015 0.022(5) 0.024(6) 0.038(7) 0.003(5) 0.002(5) 0.006(4)
 C016 0.032(6) 0.037(7) 0.028(7) -0.004(5) -0.002(5) 0.014(5)
 C017 0.038(7) 0.070(9) 0.015(7) -0.016(7) 0.005(6) 0.014(6)
 C018 0.039(7) 0.042(7) 0.024(7) 0.009(5) 0.017(5) 0.012(6)

_geom_special_details
;
 All esds (except the esd in the dihedral angle between two l.s. planes)
 are estimated using the full covariance matrix.  The cell esds are taken
 into account individually in the estimation of esds in distances, angles
 and torsion angles; correlations between esds in cell parameters are only
 used when they are defined by crystal symmetry.  An approximate (isotropic)
 treatment of cell esds is used for estimating esds involving l.s. planes.
;
loop_
  _geom_bond_atom_site_label_1
  _geom_bond_atom_site_label_2
  _geom_bond_distance
  _geom_bond_site_symmetry_2
  _geom_bond_publ_flag
 Br01 C00G 1.904(10) . ?
 Br02 C00H 1.895(9) . ?
 O003 C00N 1.421(10) . ?
 O003 C00Z 1.418(11) . ?
 O004 C00K 1.199(11) . ?
 O005 C00D 1.420(10) . ?
 O005 C00O 1.442(11) . ?
 O006 C00J 1.223(11) . ?
 N007 N00A 1.440(11) . ?
 N007 C00J 1.373(12) . ?
 N007 C00R 1.428(12) . ?
 N008 N009 1.430(11) . ?
 N008 C00K 1.387(12) . ?
 N008 C00Q 1.440(12) . ?
 N009 C00B 1.268(12) . ?
 N00A C00P 1.251(11) . ?
 C00B C00V 1.478(13) . ?
 C00B C00Z 1.487(12) . ?
 C00C H00D 0.9500 . ?
 C00C C00H 1.369(12) . ?
 C00C C00Y 1.376(12) . ?
 C00D H00E 1.0000 . ?
 C00D C00O 1.496(13) . ?
 C00D C00U 1.511(12) . ?
 C00E H00G 0.9800 . ?
 C00E H00H 0.9800 . ?
 C00E H00J 0.9800 . ?
 C00E C00P 1.475(13) . ?
 C00F H00F 0.9500 . ?
 C00F C00G 1.393(13) . ?
 C00F C00S 1.393(12) . ?
 C00G C00I 1.374(12) . ?
 C00H C00M 1.418(12) . ?
 C00I H00I 0.9500 . ?
 C00I C015 1.397(12) . ?
 C00J C00O 1.476(13) . ?
 C00K C00Z 1.508(13) . ?
 C00L H00L 0.9500 . ?
 C00L C00R 1.390(13) . ?
 C00L C014 1.381(14) . ?
 C00M H00M 0.9500 . ?
 C00M C00U 1.397(12) . ?
 C00N H00N 1.0000 . ?
 C00N C00S 1.520(12) . ?
 C00N C00Z 1.489(13) . ?
 C00O C00P 1.492(13) . ?
 C00Q C010 1.392(13) . ?
 C00Q C011 1.385(13) . ?
 C00R C012 1.379(13) . ?
 C00S C00X 1.380(12) . ?
 C00T H00T 0.9500 . ?
 C00T C011 1.365(14) . ?
 C00T C013 1.382(14) . ?
 C00U C00W 1.390(11) . ?
 C00V H00A 0.9800 . ?
 C00V H00B 0.9800 . ?
 C00V H00C 0.9800 . ?
 C00W H00W 0.9500 . ?
 C00W C00Y 1.399(12) . ?
 C00X H00X 0.9500 . ?
 C00X C015 1.388(12) . ?
 C00Y H00Y 0.9500 . ?
 C010 H010 0.9500 . ?
 C010 C018 1.402(14) . ?
 C011 H011 0.9500 . ?
 C012 H012 0.9500 . ?
 C012 C016 1.410(14) . ?
 C013 H013 0.9500 . ?
 C013 C018 1.382(15) . ?
 C014 H014 0.9500 . ?
 C014 C017 1.394(14) . ?
 C015 H015 0.9500 . ?
 C016 H016 0.9500 . ?
 C016 C017 1.387(14) . ?
 C017 H017 0.9500 . ?
 C018 H018 0.9500 . ?

loop_
  _geom_angle_atom_site_label_1
  _geom_angle_atom_site_label_2
  _geom_angle_atom_site_label_3
  _geom_angle
  _geom_angle_site_symmetry_1
  _geom_angle_site_symmetry_3
  _geom_angle_publ_flag
 C00Z O003 C00N 63.3(6) . . ?
 C00D O005 C00O 63.0(6) . . ?
 C00J N007 N00A 111.2(8) . . ?
 C00J N007 C00R 129.4(9) . . ?
 C00R N007 N00A 117.8(8) . . ?
 N009 N008 C00Q 118.9(8) . . ?
 C00K N008 N009 113.0(8) . . ?
 C00K N008 C00Q 126.7(9) . . ?
 C00B N009 N008 107.8(8) . . ?
 C00P N00A N007 108.7(8) . . ?
 N009 C00B C00V 124.3(9) . . ?
 N009 C00B C00Z 111.7(9) . . ?
 C00V C00B C00Z 124.0(9) . . ?
 C00H C00C H00D 120.0 . . ?
 C00H C00C C00Y 120.0(9) . . ?
 C00Y C00C H00D 120.0 . . ?
 O005 C00D H00E 116.1 . . ?
 O005 C00D C00O 59.2(6) . . ?
 O005 C00D C00U 115.6(8) . . ?
 C00O C00D H00E 116.1 . . ?
 C00O C00D C00U 121.3(9) . . ?
 C00U C00D H00E 116.1 . . ?
 H00G C00E H00H 109.5 . . ?
 H00G C00E H00J 109.5 . . ?
 H00H C00E H00J 109.5 . . ?
 C00P C00E H00G 109.5 . . ?
 C00P C00E H00H 109.5 . . ?
 C00P C00E H00J 109.5 . . ?
 C00G C00F H00F 121.1 . . ?
 C00G C00F C00S 117.7(9) . . ?
 C00S C00F H00F 121.1 . . ?
 C00F C00G Br01 116.9(7) . . ?
 C00I C00G Br01 120.2(8) . . ?
 C00I C00G C00F 122.9(9) . . ?
 C00C C00H Br02 121.8(7) . . ?
 C00C C00H C00M 121.1(9) . . ?
 C00M C00H Br02 117.0(7) . . ?
 C00G C00I H00I 121.1 . . ?
 C00G C00I C015 117.8(9) . . ?
 C015 C00I H00I 121.1 . . ?
 O006 C00J N007 126.2(10) . . ?
 O006 C00J C00O 129.5(10) . . ?
 N007 C00J C00O 104.2(8) . . ?
 O004 C00K N008 127.8(10) . . ?
 O004 C00K C00Z 129.9(9) . . ?
 N008 C00K C00Z 102.3(8) . . ?
 C00R C00L H00L 120.3 . . ?
 C014 C00L H00L 120.3 . . ?
 C014 C00L C00R 119.3(10) . . ?
 C00H C00M H00M 121.0 . . ?
 C00U C00M C00H 118.1(9) . . ?
 C00U C00M H00M 121.0 . . ?
 O003 C00N H00N 115.6 . . ?
 O003 C00N C00S 117.1(8) . . ?
 O003 C00N C00Z 58.3(6) . . ?
 C00S C00N H00N 115.6 . . ?
 C00Z C00N H00N 115.6 . . ?
 C00Z C00N C00S 122.4(9) . . ?
 O005 C00O C00D 57.8(6) . . ?
 O005 C00O C00J 121.8(8) . . ?
 O005 C00O C00P 119.2(8) . . ?
 C00J C00O C00D 122.9(9) . . ?
 C00J C00O C00P 104.1(9) . . ?
 C00P C00O C00D 125.8(9) . . ?
 N00A C00P C00E 124.9(10) . . ?
 N00A C00P C00O 111.1(9) . . ?
 C00E C00P C00O 123.9(9) . . ?
 C010 C00Q N008 118.1(9) . . ?
 C011 C00Q N008 121.7(10) . . ?
 C011 C00Q C010 120.2(10) . . ?
 C00L C00R N007 118.7(9) . . ?
 C012 C00R N007 119.2(10) . . ?
 C012 C00R C00L 122.0(10) . . ?
 C00F C00S C00N 119.5(9) . . ?
 C00X C00S C00F 120.9(9) . . ?
 C00X C00S C00N 119.5(8) . . ?
 C011 C00T H00T 119.5 . . ?
 C011 C00T C013 120.9(11) . . ?
 C013 C00T H00T 119.5 . . ?
 C00M C00U C00D 117.5(8) . . ?
 C00W C00U C00D 121.9(8) . . ?
 C00W C00U C00M 120.6(9) . . ?
 C00B C00V H00A 109.5 . . ?
 C00B C00V H00B 109.5 . . ?
 C00B C00V H00C 109.5 . . ?
 H00A C00V H00B 109.5 . . ?
 H00A C00V H00C 109.5 . . ?
 H00B C00V H00C 109.5 . . ?
 C00U C00W H00W 120.2 . . ?
 C00U C00W C00Y 119.6(8) . . ?
 C00Y C00W H00W 120.2 . . ?
 C00S C00X H00X 120.1 . . ?
 C00S C00X C015 119.7(9) . . ?
 C015 C00X H00X 120.1 . . ?
 C00C C00Y C00W 120.6(9) . . ?
 C00C C00Y H00Y 119.7 . . ?
 C00W C00Y H00Y 119.7 . . ?
 O003 C00Z C00B 121.9(8) . . ?
 O003 C00Z C00K 121.4(8) . . ?
 O003 C00Z C00N 58.4(6) . . ?
 C00B C00Z C00K 104.2(8) . . ?
 C00B C00Z C00N 124.5(8) . . ?
 C00N C00Z C00K 121.7(8) . . ?
 C00Q C010 H010 120.8 . . ?
 C00Q C010 C018 118.4(10) . . ?
 C018 C010 H010 120.8 . . ?
 C00Q C011 H011 119.8 . . ?
 C00T C011 C00Q 120.3(10) . . ?
 C00T C011 H011 119.8 . . ?
 C00R C012 H012 121.0 . . ?
 C00R C012 C016 118.1(11) . . ?
 C016 C012 H012 121.0 . . ?
 C00T C013 H013 120.5 . . ?
 C00T C013 C018 119.1(12) . . ?
 C018 C013 H013 120.5 . . ?
 C00L C014 H014 119.9 . . ?
 C00L C014 C017 120.2(10) . . ?
 C017 C014 H014 119.9 . . ?
 C00I C015 H015 119.6 . . ?
 C00X C015 C00I 120.8(9) . . ?
 C00X C015 H015 119.6 . . ?
 C012 C016 H016 119.8 . . ?
 C017 C016 C012 120.5(11) . . ?
 C017 C016 H016 119.8 . . ?
 C014 C017 H017 120.1 . . ?
 C016 C017 C014 119.9(11) . . ?
 C016 C017 H017 120.1 . . ?
 C010 C018 H018 119.5 . . ?
 C013 C018 C010 121.0(11) . . ?
 C013 C018 H018 119.5 . . ?

loop_
  _geom_torsion_atom_site_label_1
  _geom_torsion_atom_site_label_2
  _geom_torsion_atom_site_label_3
  _geom_torsion_atom_site_label_4
  _geom_torsion
  _geom_torsion_site_symmetry_1
  _geom_torsion_site_symmetry_2
  _geom_torsion_site_symmetry_3
  _geom_torsion_site_symmetry_4
  _geom_torsion_publ_flag
 Br01 C00G C00I C015 -179.7(9) . . . . ?
 Br02 C00H C00M C00U 175.7(7) . . . . ?
 O003 C00N C00S C00F 4.6(15) . . . . ?
 O003 C00N C00S C00X -174.5(9) . . . . ?
 O003 C00N C00Z C00B 109.3(10) . . . . ?
 O003 C00N C00Z C00K -109.8(10) . . . . ?
 O004 C00K C00Z O003 -28.6(16) . . . . ?
 O004 C00K C00Z C00B -171.1(10) . . . . ?
 O004 C00K C00Z C00N 41.4(15) . . . . ?
 O005 C00D C00O C00J -109.5(10) . . . . ?
 O005 C00D C00O C00P 104.9(10) . . . . ?
 O005 C00D C00U C00M -5.0(14) . . . . ?
 O005 C00D C00U C00W 176.2(9) . . . . ?
 O005 C00O C00P N00A -145.7(9) . . . . ?
 O005 C00O C00P C00E 31.5(13) . . . . ?
 O006 C00J C00O O005 -36.3(15) . . . . ?
 O006 C00J C00O C00D 33.4(15) . . . . ?
 O006 C00J C00O C00P -174.8(9) . . . . ?
 N007 N00A C00P C00E -175.4(8) . . . . ?
 N007 N00A C00P C00O 1.8(11) . . . . ?
 N007 C00J C00O O005 146.1(9) . . . . ?
 N007 C00J C00O C00D -144.2(9) . . . . ?
 N007 C00J C00O C00P 7.7(9) . . . . ?
 N007 C00R C012 C016 -175.9(9) . . . . ?
 N008 N009 C00B C00V -177.0(8) . . . . ?
 N008 N009 C00B C00Z 2.5(11) . . . . ?
 N008 C00K C00Z O003 152.2(8) . . . . ?
 N008 C00K C00Z C00B 9.6(9) . . . . ?
 N008 C00K C00Z C00N -137.9(9) . . . . ?
 N008 C00Q C010 C018 -177.6(8) . . . . ?
 N008 C00Q C011 C00T 178.0(9) . . . . ?
 N009 N008 C00K O004 171.7(9) . . . . ?
 N009 N008 C00K C00Z -9.0(9) . . . . ?
 N009 N008 C00Q C010 -3.1(12) . . . . ?
 N009 N008 C00Q C011 176.5(8) . . . . ?
 N009 C00B C00Z O003 -150.1(9) . . . . ?
 N009 C00B C00Z C00K -7.9(11) . . . . ?
 N009 C00B C00Z C00N 138.5(10) . . . . ?
 N00A N007 C00J O006 175.1(9) . . . . ?
 N00A N007 C00J C00O -7.2(10) . . . . ?
 N00A N007 C00R C00L 170.5(8) . . . . ?
 N00A N007 C00R C012 -12.7(14) . . . . ?
 C00C C00H C00M C00U -1.0(17) . . . . ?
 C00D O005 C00O C00J 111.4(10) . . . . ?
 C00D O005 C00O C00P -116.1(10) . . . . ?
 C00D C00O C00P N00A 144.7(10) . . . . ?
 C00D C00O C00P C00E -38.1(15) . . . . ?
 C00D C00U C00W C00Y -178.9(9) . . . . ?
 C00F C00G C00I C015 1.2(18) . . . . ?
 C00F C00S C00X C015 1.4(17) . . . . ?
 C00G C00F C00S C00N -178.5(10) . . . . ?
 C00G C00F C00S C00X 0.7(16) . . . . ?
 C00G C00I C015 C00X 0.9(17) . . . . ?
 C00H C00C C00Y C00W -2.1(17) . . . . ?
 C00H C00M C00U C00D 179.5(9) . . . . ?
 C00H C00M C00U C00W -1.6(16) . . . . ?
 C00J N007 N00A C00P 3.7(11) . . . . ?
 C00J N007 C00R C00L -25.4(16) . . . . ?
 C00J N007 C00R C012 151.4(10) . . . . ?
 C00J C00O C00P N00A -6.0(11) . . . . ?
 C00J C00O C00P C00E 171.2(8) . . . . ?
 C00K N008 N009 C00B 4.6(11) . . . . ?
 C00K N008 C00Q C010 162.9(9) . . . . ?
 C00K N008 C00Q C011 -17.4(15) . . . . ?
 C00L C00R C012 C016 0.8(16) . . . . ?
 C00L C014 C017 C016 2.4(16) . . . . ?
 C00M C00U C00W C00Y 2.4(15) . . . . ?
 C00N O003 C00Z C00B -113.6(10) . . . . ?
 C00N O003 C00Z C00K 110.4(10) . . . . ?
 C00N C00S C00X C015 -179.5(10) . . . . ?
 C00O O005 C00D C00U -112.7(10) . . . . ?
 C00O C00D C00U C00M -73.1(13) . . . . ?
 C00O C00D C00U C00W 108.1(11) . . . . ?
 C00Q N008 N009 C00B 172.4(8) . . . . ?
 C00Q N008 C00K O004 4.9(16) . . . . ?
 C00Q N008 C00K C00Z -175.8(8) . . . . ?
 C00Q C010 C018 C013 -0.6(14) . . . . ?
 C00R N007 N00A C00P 170.5(8) . . . . ?
 C00R N007 C00J O006 10.2(16) . . . . ?
 C00R N007 C00J C00O -172.1(9) . . . . ?
 C00R C00L C014 C017 -0.4(16) . . . . ?
 C00R C012 C016 C017 1.2(16) . . . . ?
 C00S C00F C00G Br01 178.9(8) . . . . ?
 C00S C00F C00G C00I -2.1(17) . . . . ?
 C00S C00N C00Z O003 104.0(10) . . . . ?
 C00S C00N C00Z C00B -146.7(10) . . . . ?
 C00S C00N C00Z C00K -5.8(14) . . . . ?
 C00S C00X C015 C00I -2.2(18) . . . . ?
 C00T C013 C018 C010 -2.0(14) . . . . ?
 C00U C00D C00O O005 103.0(9) . . . . ?
 C00U C00D C00O C00J -6.5(14) . . . . ?
 C00U C00D C00O C00P -152.1(9) . . . . ?
 C00U C00W C00Y C00C -0.5(16) . . . . ?
 C00V C00B C00Z O003 29.3(14) . . . . ?
 C00V C00B C00Z C00K 171.6(9) . . . . ?
 C00V C00B C00Z C00N -42.0(14) . . . . ?
 C00Y C00C C00H Br02 -173.7(8) . . . . ?
 C00Y C00C C00H C00M 2.9(17) . . . . ?
 C00Z O003 C00N C00S -113.0(10) . . . . ?
 C00Z C00N C00S C00F -63.3(14) . . . . ?
 C00Z C00N C00S C00X 117.5(11) . . . . ?
 C010 C00Q C011 C00T -2.4(15) . . . . ?
 C011 C00Q C010 C018 2.8(14) . . . . ?
 C011 C00T C013 C018 2.4(15) . . . . ?
 C012 C016 C017 C014 -2.8(16) . . . . ?
 C013 C00T C011 C00Q -0.2(15) . . . . ?
 C014 C00L C00R N007 175.5(9) . . . . ?
 C014 C00L C00R C012 -1.2(16) . . . . ?

_shelx_res_file
;
    exp_286.res created by SHELXL-2014/7

TITL exp_286_a.res in P4(3)
REM Old TITL exp_286 in P43 #78
REM SHELXT solution in P4(3)
REM R1 0.100, Rweak 0.020, Alpha 0.003, Orientation as input
REM Flack x = -0.028 ( 0.022 ) from Parsons' quotients
REM Formula found by SHELXT: C34 Br2 N4 O4
CELL 0.71073 14.491363 14.491363 14.493484 90 90 90
ZERR 8 0.000343 0.000343 0.000485 0 0 0
LATT -1
SYMM -X,-Y,0.5+Z
SYMM -Y,+X,0.75+Z
SYMM +Y,-X,0.25+Z
SFAC C H Br N O
UNIT 136 104 8 16 16

L.S. 10
PLAN  20
TEMP -173.15
BOND $H
LIST 6
MORE -1
CONF
fmap 2
acta 52
OMIT 6 9 -1
OMIT -7 8 0
REM <olex2.extras>
REM <HklSrc "%.\\exp_286.hkl">
REM </olex2.extras>

WGHT    0.000000
FVAR       0.28098
BR01  3    0.154249    0.372243    0.802099    11.00000    0.03006    0.02970 =
         0.03860   -0.00029    0.00176   -0.00433
BR02  3    0.388165    1.102871    0.687537    11.00000    0.03069    0.03115 =
         0.03818    0.00442   -0.00183   -0.00532
O003  5    0.321587    0.704051    0.822498    11.00000    0.02044    0.02972 =
         0.01959   -0.00188   -0.00177    0.00697
O004  5    0.283389    0.612277    0.635106    11.00000    0.02658    0.02537 =
         0.03031   -0.00235   -0.00664   -0.00317
O005  5    0.192633    0.793352    0.693627    11.00000    0.02126    0.02402 =
         0.03078   -0.00142   -0.00571    0.00089
O006  5    0.199409    0.892805    0.504456    11.00000    0.03466    0.02978 =
         0.03041   -0.00715    0.00463   -0.00874
N007  4    0.098474    0.774260    0.468346    11.00000    0.03006    0.02342 =
         0.02616    0.00401    0.00203   -0.00627
N008  4    0.384199    0.727038    0.586168    11.00000    0.01440    0.02267 =
         0.02548   -0.00217   -0.00475    0.00778
N009  4    0.434202    0.801238    0.627711    11.00000    0.03218    0.02930 =
         0.02351    0.00023    0.00335   -0.00150
N00A  4    0.053638    0.700547    0.517589    11.00000    0.02392    0.02659 =
         0.01961   -0.00142   -0.00219   -0.00147
C00B  1    0.427333    0.792786    0.714502    11.00000    0.01672    0.01845 =
         0.02467    0.00391   -0.00381   -0.00260
C00C  1    0.194476    1.141635    0.683852    11.00000    0.03269    0.02009 =
         0.01526   -0.00126    0.00338    0.00621
AFIX  43
H00D  2    0.211916    1.204472    0.677144    11.00000   -1.20000
AFIX   0
C00D  1    0.117711    0.855981    0.702091    11.00000    0.02489    0.02936 =
         0.01213   -0.01344   -0.00336    0.00630
AFIX  13
H00E  2    0.069031    0.839117    0.747995    11.00000   -1.20000
AFIX   0
C00E  1    0.041144    0.644242    0.674204    11.00000    0.02673    0.02079 =
         0.03274    0.00220   -0.00171    0.00436
AFIX 137
H00G  2   -0.008110    0.671797    0.711456    11.00000   -1.50000
H00H  2    0.094047    0.629918    0.713814    11.00000   -1.50000
H00J  2    0.018506    0.587398    0.645405    11.00000   -1.50000
AFIX   0

C00F  1    0.291908    0.509818    0.808167    11.00000    0.02349    0.02179 =
         0.01915   -0.00298    0.00602    0.00746
AFIX  43
H00F  2    0.241159    0.551232    0.805512    11.00000   -1.20000
AFIX   0
C00G  1    0.278506    0.414656    0.806953    11.00000    0.02663    0.04043 =
         0.03218   -0.00509    0.01144    0.00598

C00H  1    0.260620    1.074215    0.685783    11.00000    0.02399    0.02884 =
         0.02779   -0.00605   -0.00053    0.00504
C00I  1    0.350168    0.352525    0.807818    11.00000    0.03585    0.01767 =
         0.03046   -0.00557    0.00853    0.00148
AFIX  43
H00I  2    0.339009    0.287958    0.805743    11.00000   -1.20000
AFIX   0

C00J  1    0.149349    0.828682    0.526851    11.00000    0.01727    0.01995 =
         0.03188   -0.00027    0.00374   -0.00080
C00K  1    0.337886    0.672735    0.649982    11.00000    0.02221    0.02077 =
         0.02463    0.00846    0.00409    0.00151
C00L  1    0.131387    0.845155    0.320378    11.00000    0.02422    0.03764 =
         0.01700   -0.00300   -0.00368    0.00075
AFIX  43
H00L  2    0.145829    0.901147    0.351260    11.00000   -1.20000
AFIX   0
C00M  1    0.236297    0.979624    0.691554    11.00000    0.02794    0.02830 =
         0.01335    0.00000    0.00407    0.00787
AFIX  43
H00M  2    0.282308    0.932927    0.691905    11.00000   -1.20000
AFIX   0

C00N  1    0.400025    0.645485    0.817357    11.00000    0.02011    0.02979 =
         0.02389   -0.00507   -0.00264    0.00118
AFIX  13
H00N  2    0.454302    0.664968    0.855250    11.00000   -1.20000
AFIX   0

C00O  1    0.125964    0.794194    0.619792    11.00000    0.02096    0.02226 =
         0.02679    0.00113    0.00563    0.00179
C00P  1    0.069719    0.709874    0.601877    11.00000    0.01798    0.02296 =
         0.02344    0.00551   -0.00091    0.00646
C00Q  1    0.371479    0.726846    0.487598    11.00000    0.02013    0.03033 =
         0.02376   -0.00067   -0.00017    0.00122
C00R  1    0.100994    0.768866    0.369997    11.00000    0.02059    0.03511 =
         0.02461   -0.00256    0.00674   -0.00099
C00S  1    0.382274    0.542204    0.813407    11.00000    0.02373    0.02373 =
         0.01529   -0.00307   -0.00722   -0.00344
C00T  1    0.314353    0.657673    0.349563    11.00000    0.02394    0.03800 =
         0.02661   -0.00480   -0.00303   -0.00002
AFIX  43
H00T  2    0.284615    0.607552    0.319548    11.00000   -1.20000
AFIX   0

C00U  1    0.142738    0.957088    0.696707    11.00000    0.02483    0.02640 =
         0.01037   -0.00446   -0.00311    0.00038
C00V  1    0.466049    0.858791    0.781946    11.00000    0.04443    0.02682 =
         0.02980   -0.00193   -0.01014   -0.00434
AFIX 137
H00A  2    0.512601    0.827618    0.819814    11.00000   -1.50000
H00B  2    0.416530    0.882046    0.821695    11.00000   -1.50000
H00C  2    0.494681    0.910467    0.749040    11.00000   -1.50000
AFIX   0

C00W  1    0.075972    1.025949    0.698477    11.00000    0.02736    0.02193 =
         0.02267    0.00448    0.00405    0.00036
AFIX  43
H00W  2    0.012576    1.010306    0.704303    11.00000   -1.20000
AFIX   0

C00X  1    0.455814    0.481807    0.816228    11.00000    0.02751    0.03104 =
         0.02578    0.00293   -0.00833   -0.00955
AFIX  43
H00X  2    0.517044    0.504704    0.821147    11.00000   -1.20000
AFIX   0

C00Y  1    0.102765    1.118413    0.691623    11.00000    0.03132    0.02225 =
         0.02797    0.00376    0.01021    0.00741
AFIX  43
H00Y  2    0.057242    1.165581    0.692339    11.00000   -1.20000
AFIX   0

C00Z  1    0.374676    0.708651    0.740407    11.00000    0.02359    0.02242 =
         0.02047   -0.01121    0.00100    0.00176
C010  1    0.404832    0.801732    0.437576    11.00000    0.02670    0.02104 =
         0.03120   -0.00024    0.00588    0.00652
AFIX  43
H010  2    0.437164    0.850329    0.467416    11.00000   -1.20000
AFIX   0
C011  1    0.327944    0.654549    0.442694    11.00000    0.03099    0.03324 =
         0.01626   -0.00122    0.00285   -0.00253
AFIX  43
H011  2    0.307443    0.602524    0.476905    11.00000   -1.20000
AFIX   0

C012  1    0.077771    0.686997    0.327403    11.00000    0.03073    0.03687 =
         0.03182   -0.01217   -0.01442    0.00208
AFIX  43
H012  2    0.056388    0.635738    0.362224    11.00000   -1.20000
AFIX   0

C013  1    0.343243    0.732720    0.298313    11.00000    0.02359    0.04809 =
         0.03556   -0.00294    0.00331    0.01548
AFIX  43
H013  2    0.331439    0.735486    0.233897    11.00000   -1.20000
AFIX   0

C014  1    0.140362    0.838686    0.225734    11.00000    0.03328    0.04937 =
         0.02327    0.01464   -0.00374    0.00392
AFIX  43
H014  2    0.160717    0.890570    0.191224    11.00000   -1.20000
AFIX   0

C015  1    0.439953    0.387415    0.811849    11.00000    0.02208    0.02428 =
         0.03764    0.00306    0.00245    0.00590
AFIX  43
H015  2    0.490797    0.346033    0.811590    11.00000   -1.20000
AFIX   0

C016  1    0.086682    0.681571    0.230658    11.00000    0.03164    0.03680 =
         0.02837   -0.00420   -0.00204    0.01351
AFIX  43
H016  2    0.069990    0.626368    0.199491    11.00000   -1.20000
AFIX   0
C017  1    0.119643    0.756252    0.180682    11.00000    0.03825    0.07036 =
         0.01542   -0.01574    0.00497    0.01399
AFIX  43
H017  2    0.128084    0.751236    0.115875    11.00000   -1.20000
AFIX   0

C018  1    0.389554    0.803708    0.342068    11.00000    0.03897    0.04203 =
         0.02404    0.00923    0.01699    0.01193
AFIX  43
H018  2    0.411345    0.854570    0.306919    11.00000   -1.20000
AFIX   0
HKLF 4

REM  exp_286_a.res in P4(3)
REM R1 =  0.0553 for    3296 Fo > 4sig(Fo)  and  0.0841 for all    5623 data
REM    399 parameters refined using      1 restraints

END

WGHT      0.0000      0.0000

REM Highest difference peak  0.821,  deepest hole -0.521,  1-sigma level  0.091
Q1    1   0.0800  0.3887  0.8036  11.00000  0.05    0.55
Q2    1   0.3896  1.1821  0.6912  11.00000  0.05    0.54
Q3    1   0.1333  0.2903  0.8019  11.00000  0.05    0.47
Q4    1   0.2194  0.3396  0.7869  11.00000  0.05    0.44
Q5    1   0.3563  1.0354  0.6951  11.00000  0.05    0.43
Q6    1   0.3141  1.1354  0.6855  11.00000  0.05    0.40
Q7    1   0.3513  0.9195  0.1969  11.00000  0.05    0.34
Q8    1   0.1837  0.4446  0.7849  11.00000  0.05    0.34
Q9    1   0.4159  0.8997  0.8017  11.00000  0.05    0.32
Q10   1   0.1232  0.5291  0.7563  11.00000  0.05    0.32
Q11   1   0.2244  0.5260  0.8122  11.00000  0.05    0.31
Q12   1   0.4579  1.0713  0.6858  11.00000  0.05    0.31
Q13   1   0.0065  0.9652  0.6175  11.00000  0.05    0.31
Q14   1   0.4643  1.0921  0.7420  11.00000  0.05    0.31
Q15   1   0.1606  0.4578  0.7981  11.00000  0.05    0.30
Q16   1   0.4525  1.0834  0.6318  11.00000  0.05    0.29
Q17   1   0.2971  1.1055  0.7518  11.00000  0.05    0.29
Q18   1   0.4182  0.7575  0.7368  11.00000  0.05    0.29
Q19   1   0.1076  1.1777  0.6034  11.00000  0.05    0.29
Q20   1   0.1024  0.7792  0.2333  11.00000  0.05    0.28
;
_shelx_res_checksum               72075
_shelx_hkl_file
;
   0 -17   0  121.54   70.20
   0 -16   0   13.77   29.24
   0 -15   0   27.60   28.75
   0 -14   0   20.24   33.24
   0 -13   0  159.41   76.18
   0 -12   0  290.82  101.45
   0 -11   0  100.74   58.22
   0 -10   0  171.32   70.54
   0  -9   0  216.74   72.59
   0  -8   0  577.71  107.57
   0  -7   0   39.86   26.57
   0  -6   0   -0.20    8.82
   0  -5   0    0.58    2.53
   0  -5   0    1.54    8.65
   0  -4   0 7554.18  256.66
   0  -4   0 8462.98  310.34
   0  -3   0   18.74   10.52
   0  -3   0   16.05    9.66
   0  -2   0 1776.89   88.01
   0  -2   0 1911.12  104.70
   0   2   0 1549.65   78.70
   0   2   0 1883.27  104.39
   0   3   0   20.03   13.58
   0   3   0   15.54   11.37
   0   4   0 8181.63  311.96
   0   4   0 7955.60  273.55
   0   5   0    8.82   13.34
   0   5   0    3.34    8.64
   0   6   0   11.23   14.95
   0   6   0    1.10    8.75
   0   7   0   42.43   30.90
   0   8   0  567.94  119.63
   0   9   0  223.72   81.91
   0  10   0  200.79   80.55
   0  11   0  101.06   65.18
   0  12   0  363.38  135.38
   0  13   0  174.73   90.89
   0  14   0   27.06   48.44
   0  15   0   63.79   68.09
   0  16   0   13.53   36.21
   0  17   0  165.24  100.88
  -1 -17   0   82.66   61.13
   0 -17  -1   42.35   46.45
   1 -17   0   60.17   45.02
   0 -17   1   41.25   45.96
   1 -16   0   18.51   26.53
   0 -16   1   74.53   62.04
   0 -16  -1   90.01   64.95
   0 -15  -1  -12.01   36.09
   0 -15   1    5.15   25.60
  -1 -15   0   45.68   40.92
   1 -15   0   44.05   43.81
   1 -14   0    9.51   13.80
   0 -14   1  152.32   70.52
   0 -14  -1  173.91   79.82
  -1 -14   0    5.01    3.33
   0 -13  -1   48.57   41.65
  -1 -13   0   92.30   60.67
   0 -13   1   57.83   44.53
   1 -13   0   36.44   36.51
   1 -12   0   -0.78   20.15
   0 -12  -1  148.43   72.30
   0 -12   1  120.90   59.96
   0 -11  -1   23.04   31.70
   1 -11   0    4.31   16.58
   0 -11   1   10.88   14.69
   1 -10   0   22.70   26.24
   0 -10   1   50.59   37.82
  -1 -10   0   -2.98   22.86
   0 -10  -1   60.10   38.56
   1  -9   0   66.36   39.22
   0  -9  -1  165.52   61.91
  -1  -9   0    4.65    7.63
   0  -9   1  175.23   69.37
   0  -8   1  469.39   99.61
   0  -8  -1  364.12   82.37
  -1  -7   0  167.15   56.35
   0  -7  -1  222.19   61.11
   0  -7   1  268.34   74.22
  -1  -6   0   67.74   32.48
   1  -6   0   29.96   19.48
   0  -6   1  178.75   54.55
   0  -6  -1  139.26   43.96
   0  -5  -1  192.55   46.31
   1  -5   0  801.26  111.74
   0  -5   1  379.00   82.52
   1  -5   0  664.88   79.51
   0  -5  -1  274.22   61.41
  -1  -5   0 1359.90  135.44
  -1  -5   0 1547.54  158.73
   0  -5   1  404.66   72.56
   1  -4   0  218.88   40.61
   0  -4  -1  307.15   55.58
   0  -4   1  393.13   63.53
   1  -4   0  269.16   57.52
  -1  -4   0 1172.31  120.35
   0  -4  -1  337.79   61.78
  -1  -4   0 1044.89  106.42
   0  -4   1  392.71   77.35
   0  -3   1 1120.90   91.65
   0  -3  -1 1250.73   99.57
  -1  -3   0 3666.38  174.90
   0  -3   1 1234.60  125.01
   1  -3   0 4889.28  216.98
  -1  -3   0 4349.93  202.60
   1  -3   0 3853.73  132.40
   0  -3  -1 1289.42  102.69
   1  -2   0   18.60   11.02
  -1  -2   0   -0.23    1.81
   0  -2  -1    8.40    7.49
   0  -2   1   25.04   10.38
   1  -2   0   14.16    5.77
   0  -2  -1    9.44    7.05
  -1  -1   0   11.12    7.27
   1  -1   0    8.23    5.93
   1   1   0    9.41    5.56
  -1   1   0   12.34    6.89
   1   2   0    2.33    2.86
   0   2  -1   11.63    7.64
   0   2  -1    9.03    8.73
  -1   2   0   20.45   13.63
  -1   2   0   16.92    7.46
   1   2   0    4.17    5.73
   0   2   1   30.82   12.97
   1   3   0 3734.19  177.99
  -1   3   0 5255.97  228.78
   0   3   1 1227.31  104.05
   0   3  -1 1242.83  117.05
   1   3   0 3883.13  177.84
  -1   3   0 4518.86  153.45
   0   3   1 1109.79   94.80
   0   3  -1 1436.32  109.72
   0   4   1  413.76   74.38
  -1   4   0  259.53   47.02
   1   4   0 1037.25  109.09
   0   4   1  354.23   61.40
   0   4  -1  299.42   54.21
   0   4  -1  303.16   59.72
   1   4   0  935.09  100.62
  -1   4   0  277.08   60.32
   0   5  -1  238.77   52.37
   0   5  -1  222.97   59.91
   1   5   0 1176.47  118.33
  -1   5   0  748.09   90.02
   0   5   1  360.61   68.43
   1   5   0 1328.93  137.40
  -1   5   0  804.76  113.77
   0   5   1  447.86   85.90
  -1   6   0   39.11   23.20
   1   6   0   54.08   29.54
  -1   6   0   37.89   21.43
   0   6   1  197.84   64.08
   0   6  -1  140.22   51.26
   0   6  -1  129.79   42.38
   1   7   0  157.82   56.90
   0   7   1  357.63   93.25
   0   7  -1  264.76   77.25
   0   8   1  554.53  124.88
   0   8  -1  415.13  101.72
   0   9  -1  192.76   75.01
   1   9   0    4.65   10.53
   0   9   1  236.10   85.66
  -1   9   0   93.49   56.08
   1  10   0    0.07   15.44
   0  10   1   54.75   47.56
   0  10  -1   56.36   39.88
  -1  10   0   15.23   17.13
   0  11   1   10.90   27.92
  -1  11   0   10.38   25.53
   0  11  -1   26.02   22.90
  -1  12   0    3.42   20.38
   0  12  -1  132.98   76.47
   0  12   1  191.08   89.89
  -1  13   0   64.04   58.51
   0  13  -1   33.66   32.59
   1  13   0  131.51   86.37
   0  13   1   59.50   47.78
   1  14   0   12.56   36.52
   0  14  -1  170.07   94.20
   0  14   1  177.29   86.83
  -1  14   0   14.56   21.92
   0  15   1   10.18   17.43
  -1  15   0   62.38   53.27
   1  15   0   74.35   68.24
   0  15  -1   30.01   43.59
   0  16   1   71.06   59.28
   0  16  -1  100.46   74.54
  -1  16   0   36.90   51.44
  -1  17   0   50.13   47.72
   0  17   1   10.48   23.44
   0  17  -1   45.46   49.25
   1  17   0   64.21   59.71
  -1 -17   1   81.95   68.44
  -1 -17  -1   63.15   48.31
   1 -17  -1    8.59    4.22
  -1 -16   1   74.37   62.85
   1 -16   1   26.60   32.71
   1 -16  -1   27.77   33.16
  -1 -16  -1   76.41   55.95
  -1 -15  -1   91.74   66.39
  -1 -15   1   71.71   56.95
   1 -15  -1   65.72   50.23
   1 -15   1  107.35   66.70
  -1 -14   1   73.69   46.82
   1 -14   1   41.90   33.71
   1 -14  -1   40.73   44.23
  -1 -14  -1  104.67   62.31
   1 -13   1  318.69  104.09
  -1 -13  -1   98.40   59.03
   1 -13  -1  316.24  104.01
  -1 -13   1  108.27   62.15
  -1 -12   1  227.34   91.47
   1 -12  -1   67.29   47.03
  -1 -12  -1  268.06   98.09
   1 -12   1   48.55   32.70
  -1 -11  -1   82.99   50.75
  -1 -11   1   68.14   42.81
   1 -11   1  124.86   59.17
   1 -11  -1  114.76   55.69
   1 -10   1  261.71   81.20
  -1 -10  -1  145.09   64.79
   1 -10  -1  199.27   66.64
  -1 -10   1  163.04   64.39
   1  -9   1  397.23   93.01
   1  -9  -1  326.82   79.99
  -1  -9  -1   89.32   46.23
  -1  -9   1  115.53   54.30
  -1  -8  -1  512.55  100.66
   1  -8   1  172.94   60.76
  -1  -8   1  700.52  128.84
   1  -8  -1  146.81   50.89
  -1  -7   1  220.59   67.87
  -1  -7  -1  204.60   60.11
   1  -6   1  566.37   92.81
   1  -6  -1  517.63   77.04
  -1  -6   1  149.50   50.92
  -1  -6  -1  150.93   48.42
  -1  -5  -1   93.11   34.54
   1  -5  -1  189.91   47.54
  -1  -5  -1   92.05   36.43
   1  -5  -1  215.90   58.16
   1  -5   1  201.12   61.11
  -1  -5   1  103.19   38.95
   1  -5   1  217.44   49.87
  -1  -4  -1  222.22   45.81
   1  -4  -1 1105.44  117.77
  -1  -4  -1  248.02   51.02
  -1  -4   1  449.73   72.85
   1  -4   1 1190.86  101.41
   1  -4  -1 1003.03   95.22
   1  -4   1 1125.66  124.67
   1  -3  -1  892.60   97.27
   1  -3   1  726.90   62.58
  -1  -3   1   71.87   24.15
  -1  -3  -1   62.50   23.89
  -1  -3  -1   79.40   24.22
   1  -3  -1  724.94   70.29
   1  -3   1  739.24   90.14
  -1  -2  -1  191.39   36.57
  -1  -2   1  206.73   37.47
   1  -2  -1  796.10   73.33
  -1  -2  -1  198.71   30.02
   1  -2   1  944.36   51.84
   1  -2   1 1018.94   91.43
  -1  -1  -1  276.95   41.73
   1  -1   1  221.64   34.55
   1  -1   1  262.55   32.79
  -1  -1   1  264.00   33.07
  -1  -1  -1  258.35   33.92
   1  -1  -1  282.25   34.84
   1   0   1  256.14   28.68
  -1   0  -1  396.02   32.05
  -1   0  -1  428.00   38.93
   1   0  -1  487.18   36.77
  -1   0   1  303.28   29.28
   1   0   1  233.42   24.82
   1   1   1  242.04   33.70
  -1   1  -1  232.43   30.40
   1   1   1  242.65   36.58
  -1   1   1  251.45   33.99
  -1   1  -1  222.32   31.92
   1   1  -1  294.09   36.20
   1   2   1  191.57   28.85
   1   2   1  158.78   32.38
  -1   2  -1  661.39   48.75
  -1   2  -1  671.15   68.49
  -1   2   1  946.07   74.30
   1   2  -1  253.04   43.24
  -1   3  -1  672.73   60.09
  -1   3   1  833.46   88.96
   1   3   1   75.40   23.31
   1   3   1   69.29   25.70
   1   3  -1  120.63   35.78
  -1   3  -1  666.15   81.47
  -1   4  -1  853.32   79.90
  -1   4   1 1140.62  117.34
   1   4   1  388.34   64.07
   1   4  -1  279.51   63.76
  -1   4  -1 1018.08  115.24
   1   4   1  423.67   72.38
   1   4  -1  306.09   62.22
   1   5   1   85.64   37.12
   1   5  -1   90.17   37.48
  -1   5   1  192.81   54.81
  -1   5  -1  173.00   39.64
   1   5  -1   91.08   34.98
   1   5   1   88.82   34.56
  -1   5  -1  201.22   57.74
  -1   5   1  182.01   43.49
  -1   6  -1  502.22   74.19
  -1   6   1  441.33   76.72
   1   6  -1  145.35   51.96
   1   6   1  147.56   49.48
  -1   6  -1  614.29  109.28
  -1   6   1  608.57  110.03
   1   7   1  231.60   67.60
  -1   7   1  686.23  126.34
  -1   7  -1  511.75  105.04
  -1   7  -1  495.58   84.64
   1   7  -1  228.80   70.92
  -1   8  -1  172.76   65.08
   1   8   1  672.69  126.69
  -1   8   1  202.44   74.19
   1   8  -1  571.32  119.86
  -1   9   1  439.44  114.67
   1   9  -1  127.21   60.26
  -1   9  -1  359.23  100.54
   1   9   1  130.55   62.43
   1  10  -1  136.06   69.06
   1  10   1  191.34   84.13
  -1  10   1  284.52   99.89
  -1  10  -1  297.69   98.56
  -1  11  -1  145.36   74.61
   1  11   1   71.54   51.53
   1  11  -1   76.69   53.06
  -1  11   1  132.10   69.25
   1  12  -1  246.87  100.61
   1  12   1  283.58  110.77
  -1  12   1   49.82   47.63
  -1  12  -1   67.38   58.07
   1  13   1  109.71   67.09
   1  13  -1   82.76   65.37
  -1  13  -1  466.47  162.11
  -1  13   1  407.20  131.23
   1  14  -1  102.17   76.40
  -1  14   1   63.39   50.86
   1  14   1  104.83   73.32
  -1  14  -1   58.50   52.09
   1  15  -1   80.22   65.89
   1  15   1   92.61   70.09
  -1  15  -1   55.83   50.85
  -1  15   1  104.44   76.42
   1  16  -1   94.92   86.12
  -1  16   1   52.32   53.98
   1  16   1  111.25   79.88
  -1  16  -1   49.74   56.08
  -1  17  -1   70.29   63.63
   1  17  -1  118.79   96.35
   1  17   1   65.44   57.67
  -1  17   1   19.55   16.36
  -1 -17   2   83.71   59.45
  -2 -17  -1   73.26   61.59
   1 -17  -2   22.35   22.42
   1 -16  -2   21.23   37.24
  -2 -16  -1   15.27   13.01
  -1 -16   2   20.94   32.01
   2 -15   1   45.77   44.77
  -1 -15   2   33.75   42.40
   1 -15  -2   10.03   21.11
  -2 -15  -1   66.94   58.59
   2 -14   1  102.92   59.10
  -2 -14  -1  275.62  112.67
  -1 -14   2   58.65   54.13
   1 -14  -2  284.35  104.35
   1 -13  -2    9.94   25.31
   2 -13   1  -13.67   24.30
  -2 -12  -1  173.35   82.06
   1 -12  -2   10.69   19.65
  -1 -12   2   -6.96   22.96
   2 -12   1  108.96   53.33
  -2 -11  -1   97.93   57.54
   1 -11  -2   17.67   18.24
  -1 -11   2   87.55   57.77
   2 -11   1  120.71   52.64
  -2 -10  -1  566.00  133.87
   2 -10   1  531.91  111.74
   1 -10  -2  656.10  121.84
   2  -9   1  282.37   75.56
  -1  -9   2  412.41  100.98
   1  -8  -2  342.79   78.83
  -1  -8   2   96.04   46.70
   2  -8   1  378.20   80.57
  -2  -8  -1  298.27   78.85
  -1  -7   2 1024.75  146.21
   1  -7  -2  232.19   64.03
   2  -7   1 1313.30  141.19
  -2  -7  -1   34.97   25.67
   2  -6   1  798.13   97.78
  -2  -6  -1  521.54   97.86
  -2  -6  -1  653.13  109.89
  -1  -6   2  668.65  114.92
   2  -5   1  427.88   63.74
  -2  -5  -1 1683.38  151.80
   1  -5  -2   32.22   23.64
   1  -5  -2   22.82   16.28
  -2  -5  -1 1398.00  144.44
  -1  -5   2  879.56  112.07
  -2  -4  -1  496.76   73.15
   1  -4  -2 1301.73  114.17
  -2  -4  -1  420.63   75.22
   1  -4  -2 1540.52  139.48
  -1  -4   2   74.22   28.82
   2  -4   1  102.25   37.94
   2  -4   1  115.52   28.12
  -1  -3   2  442.85   64.68
  -2  -3  -1 1595.64  125.56
   1  -3  -2 1163.76  107.94
   2  -3   1 2844.88  100.54
   2  -3   1 3186.00  184.08
  -2  -3  -1 1894.72  122.90
   2  -2   1   10.39   10.43
  -2  -2  -1   27.52   17.40
   1  -2  -2   80.57   24.39
  -2  -2  -1   23.37   11.92
   2  -2   1    6.57    8.73
  -1  -2   2  109.51   26.01
   2  -1   1  177.36   32.34
  -2  -1  -1  743.43   74.14
  -1  -1   2  489.87   51.95
  -2  -1  -1  565.64   48.94
  -2  -1  -1  571.23   53.32
   2  -1   1  145.11   27.98
  -2   0  -1    7.51    6.26
   2   0   1   21.46   10.06
  -2   0  -1    7.01    5.34
  -2   0  -1    6.58    4.52
   1   0  -2 1136.36   75.55
  -1   0   2 1073.23   70.24
   2   0   1   20.90    9.84
  -1   0   2 1005.00   53.47
   2   0   1   22.83    8.59
   1   0  -2  808.19   49.03
  -2   1  -1  231.64   40.69
   2   1   1  862.89   62.40
   1   1  -2  433.75   47.28
  -2   1  -1  230.78   37.01
  -1   1   2  413.03   49.16
   2   1   1  951.96   77.94
   2   1   1  922.96   73.45
  -2   1  -1  228.01   35.29
  -2   2  -1   21.79   14.16
  -1   2   2  102.61   28.77
   2   2   1    8.42    8.90
   2   2   1    7.44    6.19
   2   2   1   11.18   11.98
   1   2  -2  108.29   28.19
  -1   3   2 1084.18  100.96
   2   3   1 1686.81  105.16
  -2   3  -1 1955.54   74.79
   2   3   1 1756.45  140.10
  -2   3  -1 3020.03  175.60
   1   3  -2  560.79   81.72
   2   4   1  540.34   73.13
  -2   4  -1  130.97   43.18
  -2   4  -1  116.16   25.45
   1   4  -2   79.25   39.19
   2   4   1  522.25   87.44
  -1   5   2   13.84   11.24
   1   5  -2  910.08  132.68
   2   5   1 1623.79  143.31
  -2   5  -1  348.94   75.62
  -2   5  -1  280.91   49.21
   1   5  -2 1101.87  140.49
  -2   6  -1  849.75  131.54
  -2   6  -1  774.49   91.95
  -1   6   2 1043.77  137.30
   2   6   1  614.93  104.07
   1   6  -2  595.58  117.68
  -1   7   2  311.54   80.56
   1   7  -2  798.60  136.09
  -2   7  -1 1198.18  167.20
  -2   7  -1 1179.29  125.79
   2   7   1   19.52   22.11
  -1   8   2  523.31  115.89
  -2   8  -1  307.58   92.03
   2   8   1  329.25   88.04
  -2   9  -1  245.50   89.54
   1   9  -2  371.81  104.88
  -1   9   2  101.58   53.80
  -1  10   2  894.10  168.13
   2  10   1  706.34  147.20
  -2  10  -1  589.81  148.22
  -1  11   2   41.70   45.76
   1  11  -2   72.69   54.46
  -2  11  -1  145.50   82.06
   2  11   1   71.07   52.04
   2  12   1  225.00  101.04
  -2  12  -1  183.06   94.86
  -1  12   2    8.75   20.02
   1  12  -2    3.11   22.34
  -2  13  -1    0.15   15.53
  -1  13   2  -15.89   34.52
   2  14   1  319.24  125.00
   1  14  -2   46.64   50.35
  -2  14  -1  146.99   89.61
  -1  14   2  276.54  115.70
  -2  15  -1   55.68   52.71
   2  15   1   72.59   55.69
   1  15  -2   52.10   54.67
  -1  15   2    8.31   18.15
  -1  16   2   21.40   47.47
   2  16   1   48.28   55.32
   1  16  -2   -4.88   40.86
  -2  16  -1  104.68   80.16
  -2  17  -1   28.49   46.90
  -1  17   2   44.93   53.89
   2  17   1   90.17   71.53
   1  17  -2  117.85   94.14
  -2 -17   0   62.14   60.34
   0 -17   2   -0.12    8.90
   0 -17  -2    9.96   18.37
   0 -16  -2  102.76   63.93
   2 -16   0  -10.80   27.84
  -2 -16   0   31.81   30.06
   0 -16   2   86.42   58.46
  -2 -15   0   69.60   53.91
   0 -15  -2   47.42   47.53
   0 -15   2   47.03   46.03
   2 -15   0   85.81   54.64
   0 -14   2    2.73    8.34
   0 -14  -2   10.88   19.45
  -2 -14   0   -6.75    5.66
   2 -14   0   -2.86   11.19
   0 -13  -2   64.35   43.65
   0 -13   2  107.78   66.18
   2 -13   0  194.34   79.62
   0 -12   2  169.46   77.64
   2 -12   0    7.31   16.93
   0 -12  -2  148.04   63.53
  -2 -12   0   20.26   24.50
   2 -11   0  186.94   69.78
  -2 -11   0  178.95   83.00
   0 -11   2   47.18   39.40
   0 -11  -2   35.11   31.06
   0 -10   2   34.33   33.41
   2 -10   0   15.24   20.54
  -2 -10   0   41.05   40.06
   0 -10  -2   42.67   36.15
   0  -9   2  263.59   77.63
   0  -9  -2  228.44   70.08
  -2  -8   0  267.10   82.14
   0  -8  -2  121.32   47.74
   2  -8   0  198.80   54.43
   0  -8   2  194.35   62.39
   0  -7  -2  469.35   88.09
   2  -7   0  854.20  102.00
   0  -7   2  701.17  112.84
   0  -6   2   31.62   25.15
   0  -6  -2   16.76   24.71
   0  -5   2  509.10   78.86
   0  -5  -2  531.29   86.88
   0  -5  -2  512.78   84.66
   2  -5   0  455.09   59.86
  -2  -5   0  381.53   79.14
   2  -4   0   20.21   16.68
   0  -4  -2   16.49   14.95
   0  -4   2    6.53    6.39
   0  -4  -2   13.93   19.28
   2  -4   0   12.87    9.75
   0  -3  -2  521.47   65.38
   0  -3  -2  410.75   59.83
   2  -3   0  573.02   78.40
   0  -3   2  407.84   52.80
   2  -3   0  538.57   48.29
   0  -2   2  142.30   27.17
   2  -2   0  404.04   60.71
  -2  -2   0  415.79   61.79
   0  -2  -2  159.19   30.18
   2  -1   0    1.19    3.01
   0  -1  -2  954.71   84.01
   0  -1   2 1191.79   60.55
  -2  -1   0   17.28   11.49
  -2  -1   0   14.32    7.16
   2  -1   0    1.34    3.26
  -2  -1   0   18.52    9.92
   0  -1   2 1284.87   79.08
  -2   0   0 2031.13   96.45
   2   0   0 2024.72   87.50
   2   0   0 2013.17   73.15
  -2   0   0 1860.83   69.47
  -2   0   0 2557.88  103.72
   2   0   0 1998.99   90.24
   2   1   0   13.06   10.76
   0   1  -2 1034.30   64.33
  -2   1   0    1.45    2.99
   2   1   0   19.52    8.81
   0   1  -2 1145.99   75.82
   2   1   0   15.38    6.62
   0   1  -2  878.27   48.21
   0   1   2 1045.07   83.70
  -2   1   0    2.64    2.98
   0   2   2  155.88   29.70
  -2   2   0  390.79   54.66
   0   2  -2  172.85   29.84
   0   2   2  128.51   34.56
   2   2   0  341.04   51.40
   0   3  -2  564.78   69.38
  -2   3   0  590.14   79.36
   2   3   0    8.27    9.66
   2   3   0    5.23    3.82
   0   3   2  346.41   50.68
   0   4   2   12.57   12.90
   2   4   0 5922.74  271.85
   2   4   0 5354.76  264.35
  -2   4   0   14.90   12.78
   0   4  -2   11.82   11.85
   0   5  -2  628.11   94.96
   0   5  -2  521.72   97.26
   2   5   0  341.14   67.90
  -2   5   0  536.68   68.06
   0   5   2  499.47   84.94
  -2   5   0  671.78  110.57
   0   6  -2    9.62   14.01
   2   6   0  251.58   66.31
  -2   6   0  145.98   41.31
  -2   6   0  165.78   60.93
   0   6   2   38.29   28.90
   0   6  -2   10.89   16.51
   0   7   2  651.52  111.49
  -2   7   0  956.91  116.22
   2   7   0  158.73   56.81
   0   7  -2  576.90  114.41
  -2   7   0 1173.73  174.87
   2   8   0  240.68   76.36
   0   8  -2  143.78   58.01
  -2   8   0  301.15   94.56
   0   8   2  156.74   60.32
  -2   9   0  576.00  139.39
   0   9  -2  258.94   89.28
   2   9   0  646.18  131.92
   0   9   2  258.74   83.76
  -2  10   0   10.71   15.10
   0  10   2   36.46   31.21
   0  10  -2   53.91   43.98
   2  10   0   42.78   34.03
   0  11   2   64.44   47.16
  -2  11   0  216.65   97.87
   0  11  -2   46.20   45.59
   2  11   0  181.59   74.76
   0  12  -2  166.31   84.23
  -2  12   0   -1.75   20.75
   0  12   2  149.26   76.30
   2  12   0   22.85   27.27
  -2  13   0  243.45  104.20
   0  13   2   79.03   58.07
   0  13  -2   67.07   62.07
  -2  14   0   -4.90   14.99
   0  14  -2   20.82   38.40
   0  14   2    1.67   15.11
   2  14   0   -6.84   33.72
  -2  15   0  121.48   75.55
   0  15   2   69.60   64.80
   2  15   0   82.13   71.79
   0  15  -2   49.40   56.02
   0  16  -2  175.11  109.77
   2  16   0   32.53   54.29
  -2  16   0   -6.48   15.85
   0  16   2  180.57   97.48
   0  17   2   17.78   23.71
  -2  17   0   67.00   75.93
   2  17   0   72.98   62.36
   0  17  -2   11.48   46.72
  -1 -17  -2   91.25   62.99
  -2 -17   1   44.59   57.27
   1 -16   2    2.87   18.64
   2 -16  -1   73.82   48.13
  -1 -16  -2   -3.79   19.50
  -2 -16   1   40.87   40.93
   2 -15  -1   31.27   31.46
  -2 -15   1   59.49   51.12
   1 -15   2   22.81   29.58
  -1 -15  -2   45.90   47.28
   1 -14   2  292.18  101.77
  -2 -14   1  280.83  105.25
  -1 -14  -2   63.11   49.55
   2 -14  -1  107.18   56.67
   2 -13  -1   -0.09   10.92
   1 -13   2   11.44    4.30
  -2 -12   1  170.66   75.86
  -1 -12  -2  -11.02   17.21
   1 -12   2   14.23   17.43
   2 -12  -1  116.26   55.81
   2 -11  -1   83.42   45.13
   1 -11   2   32.99   34.83
  -2 -11   1   82.08   53.20
  -1 -11  -2   58.41   38.92
   2 -10  -1  449.23   95.11
  -2 -10   1  709.46  137.90
   1 -10   2  896.09  153.34
  -1  -9  -2  304.68   85.94
   1  -9   2  100.28   47.53
   2  -9  -1  222.65   63.72
   1  -8   2  535.94  104.90
  -1  -8  -2   46.75   31.40
   2  -8  -1  244.96   60.23
  -2  -8   1  346.98   92.37
  -1  -7  -2  667.73  107.89
  -2  -7   1   19.92   20.79
   2  -7  -1  894.02  103.74
   1  -7   2  296.98   74.42
  -2  -6   1  667.20  113.62
  -1  -6  -2  458.82   84.39
   2  -6  -1  729.66   92.91
  -1  -5  -2  870.21  108.51
   1  -5   2   16.36   12.52
  -1  -5  -2  816.72  112.29
   2  -5  -1  319.77   57.48
   1  -4   2 1626.04  174.37
  -1  -4  -2  122.70   55.19
   1  -4   2 1499.67  104.25
  -2  -4   1  558.75   85.92
   2  -4  -1  118.91   32.44
  -1  -4  -2  149.53   45.61
   2  -4  -1  143.98   47.70
  -1  -3  -2  343.21   58.23
  -1  -3  -2  428.71   60.23
  -1  -2  -2   77.48   27.43
   2  -2  -1   28.98   14.67
   1  -2   2   87.91   23.50
  -1  -2  -2  101.10   21.19
   1  -2   2  100.72   19.77
  -1  -2  -2   79.18   25.18
  -2  -2   1   11.62   10.52
  -1  -1  -2  435.16   59.86
   1  -1   2  483.30   48.93
   1  -1   2  408.51   32.90
   2  -1  -1  221.99   35.98
   2  -1  -1  248.15   31.09
   2  -1  -1  194.25   29.29
  -2  -1   1 1120.33   84.01
   1  -1   2  512.11   54.88
  -1  -1  -2  329.62   37.22
  -2  -1   1  862.29   47.60
   1   0   2  909.24   68.54
   2   0  -1   10.63    6.51
  -1   0  -2  933.49   73.54
  -2   0   1   19.28   11.11
   2   0  -1   10.42    5.73
  -2   0   1   27.59    9.86
   1   0   2  916.45   56.31
  -1   0  -2  760.26   50.70
   1   1   2  401.44   51.97
  -1   1  -2  442.14   50.85
   2   1  -1  751.65   64.92
  -2   1   1  182.95   24.02
   2   1  -1  673.23   41.70
  -1   1  -2  481.61   52.71
  -2   1   1  180.97   33.22
  -1   1  -2  453.76   37.78
  -1   2  -2   67.25   26.01
  -1   2  -2   78.09   17.88
   1   2   2   99.89   21.04
   1   2   2  103.17   33.17
  -2   2   1    7.92    7.55
   2   2  -1   36.40   17.97
  -1   3  -2 1344.72   95.52
   1   3   2  341.07   68.17
  -2   3   1 3082.33  169.95
   2   3  -1 2592.90  186.66
  -1   3  -2 1034.22  117.96
   1   3   2  447.12   57.42
   1   4   2  124.04   36.48
   1   4   2   66.38   33.80
  -1   4  -2 1788.87  131.66
   2   4  -1  565.01   91.79
  -1   4  -2 1230.37  135.14
  -2   4   1  108.55   39.22
  -1   5  -2   16.55   12.77
  -1   5  -2   19.31   18.27
  -1   6  -2  828.24  101.13
   2   6  -1  547.09  103.78
  -2   6   1  782.00  120.73
  -1   6  -2  856.53  131.27
   1   6   2  545.13   95.98
   1   7   2 1005.12  145.14
   2   7  -1   44.99   29.64
  -1   7  -2  222.04   57.89
  -2   7   1 1316.63  169.39
  -1   7  -2  256.66   77.63
   1   8   2  105.88   52.65
  -1   8  -2  437.38  112.08
  -2   8   1  361.68   95.29
   2   8  -1  307.23   85.90
  -2   9   1  281.99   89.76
   1   9   2  390.37  104.81
  -1   9  -2   72.77   47.80
  -1  10  -2  785.13  160.35
   2  10  -1  649.04  146.22
  -2  10   1  571.06  134.91
   1  11   2   64.87   44.52
  -1  11  -2   26.87   34.88
   2  11  -1   86.58   54.90
  -2  11   1  147.89   70.12
  -1  12  -2   15.54   20.02
  -2  12   1  152.68   77.95
   2  12  -1  181.47   88.66
   1  12   2   10.33   12.83
  -2  13   1   -0.19   20.14
  -1  13  -2   26.05   36.66
  -2  14   1  132.67   81.18
   1  14   2   40.65   44.64
  -1  14  -2  368.91  142.51
   2  14  -1  276.19  119.50
  -2  15   1   34.43   27.15
   1  15   2   52.14   46.62
   2  15  -1   45.29   51.73
  -1  15  -2    8.52   28.31
   2  16  -1   68.92   70.12
   1  16   2   15.14   16.80
  -2  16   1  102.50   82.65
  -1  16  -2   15.93   27.50
  -2  17   1   69.39   64.54
   2  17  -1   54.43   52.83
  -1  17  -2   77.43   73.19
   1  17   2   95.46   79.44
  -2 -17   2   70.67   55.49
  -2 -17  -2   67.61   60.21
   2 -16  -2   84.52   64.55
  -2 -16   2   46.69   42.82
  -2 -16  -2   55.82   46.29
   2 -15   2   22.72   24.58
  -2 -15   2  148.60   82.28
  -2 -15  -2  139.35   81.41
   2 -15  -2   34.39   35.95
  -2 -14   2   73.78   57.28
   2 -14  -2    9.57   12.61
   2 -14   2   15.21   19.35
  -2 -14  -2   50.23   44.65
   2 -13   2  157.24   69.53
  -2 -13   2  117.22   73.04
  -2 -13  -2   29.93   29.36
   2 -13  -2  109.27   50.95
  -2 -12  -2  109.60   61.49
  -2 -12   2  151.33   75.66
   2 -12  -2  289.43   87.05
  -2 -11  -2  364.28  105.47
   2 -11  -2  249.64   78.18
  -2 -11   2  536.39  138.79
   2 -11   2  308.60   88.96
  -2 -10  -2  122.59   56.23
   2 -10   2  152.81   58.78
   2 -10  -2  137.25   51.61
  -2 -10   2  129.98   66.74
   2  -9   2  129.71   52.14
  -2  -9  -2  227.82   73.84
   2  -9  -2   95.39   40.00
  -2  -8   2  635.30  129.95
  -2  -8  -2  536.20  110.51
   2  -8  -2  350.27   77.82
   2  -8   2  517.34   93.90
   2  -7  -2  205.28   57.36
  -2  -7   2  205.50   69.37
   2  -7   2  251.92   62.75
  -2  -7  -2  184.74   62.15
   2  -6   2 1715.01  127.74
  -2  -6   2  510.91  104.43
   2  -6  -2 1512.29  140.84
  -2  -6  -2  393.89   75.13
  -2  -6  -2  344.21   76.02
  -2  -5   2  151.78   49.29
  -2  -5  -2  105.45   38.70
  -2  -5  -2  133.17   38.87
   2  -5  -2    3.00    5.33
   2  -5   2   -2.71    5.46
  -2  -4   2  242.44   53.01
   2  -4  -2  119.27   41.91
   2  -4   2  150.98   27.45
   2  -4   2  167.68   53.92
  -2  -4  -2  325.54   64.78
  -2  -4  -2  351.41   54.73
  -2  -3  -2   85.91   22.03
  -2  -3   2   69.69   25.43
   2  -3   2  115.56   41.14
  -2  -3  -2   86.89   31.33
   2  -3   2  118.19   34.00
   2  -3  -2   89.81   31.90
   2  -3   2  121.19   21.43
  -2  -2  -2 1581.33  141.41
   2  -2   2 1427.26   56.86
   2  -2  -2 1620.72  119.46
   2  -2   2 1538.73  127.15
  -2  -2  -2 1527.68   68.77
  -2  -2   2 1550.95  111.41
   2  -2   2 1660.69  122.75
  -2  -2  -2 1508.07  115.46
  -2  -2  -2 1377.45   95.37
  -2  -1   2  102.87   25.31
  -2  -1  -2   84.64   25.41
   2  -1   2  115.13   28.72
  -2  -1  -2   77.21   24.77
   2  -1  -2   96.32   21.77
  -2  -1  -2   56.40   16.78
   2  -1   2  101.40   27.99
  -2   0  -2  127.16   25.80
   2   0   2  125.38   25.48
  -2   0   2  164.87   32.12
   2   0   2  132.21   28.75
   2   0  -2  165.35   31.93
   2   0  -2  187.30   22.50
  -2   0  -2  156.60   33.81
   2   1  -2   76.49   23.00
  -2   1  -2   88.99   25.46
  -2   1  -2   80.80   23.73
   2   1   2   88.78   22.06
  -2   1  -2   72.77   21.53
  -2   1   2  111.72   22.21
   2   1   2   80.56   24.17
  -2   2  -2 1455.36  111.47
  -2   2   2 1661.61  121.92
   2   2   2 1551.22  132.37
   2   2   2 1447.29  114.46
  -2   2  -2 1429.32  106.69
  -2   2  -2 1711.94   69.29
   2   2   2 1484.79   63.74
   2   2  -2 1761.38  123.17
   2   3   2   65.27   19.22
   2   3   2   56.32   29.38
  -2   3  -2   89.73   33.61
  -2   3   2  112.50   34.27
   2   3  -2  139.80   44.21
  -2   3  -2  125.74   24.58
   2   3   2   65.92   28.71
  -2   4  -2   96.59   39.12
   2   4   2  328.45   55.61
   2   4   2  266.27   61.25
   2   4   2  244.76   62.70
  -2   4  -2  118.91   29.00
   2   4  -2  438.78   80.73
  -2   4   2  162.15   45.08
  -2   5  -2    4.85    8.27
  -2   5  -2    3.83   13.26
  -2   5   2    0.53    7.23
  -2   6   2 1691.06  174.03
  -2   6  -2 1411.50  120.94
   2   6  -2  439.71   99.94
  -2   6  -2 1624.32  183.65
   2   6   2  475.59   94.67
   2   7   2  197.35   67.44
   2   7  -2  248.44   79.90
  -2   7  -2  167.64   44.46
  -2   7  -2  201.11   70.91
  -2   7   2  209.74   68.91
  -2   8  -2  408.86  104.83
   2   8  -2  620.03  127.73
  -2   8   2  427.44  104.57
   2   8   2  697.61  131.15
  -2   9  -2  125.32   65.34
   2   9   2  368.07  100.04
  -2   9   2  136.82   61.07
   2   9  -2  303.68   93.73
  -2  10  -2  157.79   75.35
   2  10   2  135.83   63.34
  -2  10   2  183.83   78.74
   2  10  -2  132.65   67.90
  -2  11   2  301.43  104.72
  -2  11  -2  281.65  105.45
   2  11   2  490.75  133.47
   2  11  -2  435.52  124.44
   2  12   2  148.78   77.18
  -2  12  -2  398.42  134.61
   2  12  -2  110.09   67.45
  -2  12   2  373.82  118.44
   2  13  -2   54.07   51.48
  -2  13  -2  178.45   96.77
  -2  13   2  122.38   73.54
   2  13   2   97.63   62.45
   2  14   2   55.15   49.88
   2  14  -2   64.03   58.37
  -2  14   2   16.49   24.47
  -2  14  -2   21.85   30.30
  -2  15   2   56.90   56.02
   2  15   2  155.01   87.15
  -2  15  -2   49.98   56.94
   2  15  -2  132.50   85.86
  -2  16   2   77.56   55.90
   2  16  -2   49.79   59.91
   2  16   2   30.94   38.92
  -2  16  -2   79.10   71.40
  -2  17   2   44.24   49.93
  -2  17  -2   60.04   62.35
   2  17   2  100.99   77.79
   2  17  -2  158.29  104.99
  -2 -17   3    2.23   17.20
   2 -17  -3   21.63   25.81
   2 -16  -3   57.33   41.49
  -3 -16  -2   -6.39   32.47
  -2 -16   3   71.88   56.10
  -3 -15  -2   25.56   28.09
   2 -15  -3   75.29   53.06
  -2 -15   3   59.74   41.75
  -2 -14   3   16.82   20.65
   3 -14   2   28.18   27.72
   2 -14  -3    1.60   13.44
   3 -13   2  190.35   67.06
  -2 -13   3   10.15   18.88
  -3 -13  -2  219.14   91.99
   2 -13  -3  111.96   55.18
  -2 -12   3   45.18   38.11
   2 -12  -3   49.35   34.03
   3 -12   2   10.33   14.42
  -3 -12  -2   14.11   21.74
   2 -11  -3  153.64   59.73
  -3 -11  -2  128.90   70.81
  -2 -11   3   95.11   52.71
  -2 -10   3   11.74   20.15
   2 -10  -3   58.02   35.21
   3 -10   2  100.85   47.02
  -2  -9   3  132.74   50.21
  -3  -9  -2  137.73   60.49
   2  -9  -3   78.35   41.17
   3  -9   2  188.85   58.80
   2  -8  -3   61.69   33.38
   3  -8   2   22.13   17.41
  -2  -8   3   47.59   31.10
   3  -7   2  358.90   59.27
   2  -7  -3   79.56   36.72
  -2  -7   3  122.57   45.51
  -3  -7  -2  457.39   98.04
  -3  -6  -2  354.47   75.68
  -3  -6  -2  279.49   73.10
   3  -6   2  312.03   46.79
  -2  -6   3  429.72   83.08
  -3  -5  -2   56.87   34.11
  -3  -5  -2   78.63   33.47
  -2  -5   3   75.75   34.66
   3  -4   2 1173.24  133.86
  -3  -4  -2  875.46   90.80
  -2  -4   3  908.61  105.76
   3  -4   2 1068.36  118.31
  -3  -4  -2  680.58   97.08
   3  -4   2 1156.08   60.97
  -3  -3  -2  754.69  104.24
  -3  -3  -2  715.77   79.97
   2  -3  -3  355.92   64.71
  -3  -3  -2  629.65   83.49
   3  -3   2  658.57   86.77
  -2  -3   3  190.10   45.76
   3  -3   2  583.23   86.41
  -3  -2  -2   95.37   32.15
  -3  -2  -2   75.64   23.92
   3  -2   2   50.08   22.14
  -3  -2  -2  109.67   38.51
   3  -2   2   86.81   31.51
   2  -2  -3  281.01   53.41
  -2  -2   3  283.07   52.92
   2  -2  -3  229.06   37.26
   3  -1   2  428.43   62.15
  -3  -1  -2 1039.99  104.73
  -3  -1  -2  875.50   77.50
   2  -1  -3  138.58   31.35
  -2  -1   3  240.67   44.07
   3  -1   2  339.79   48.05
  -3  -1  -2 1001.06   92.09
   3  -1   2  453.90   66.80
   3   0   2  380.78   55.71
   2   0  -3 2733.46  112.67
  -2   0   3 2959.97   98.83
  -3   0  -2  439.77   52.05
  -3   0  -2  453.43   64.09
   2   0  -3 2954.91  148.19
  -2   0   3 3232.67  153.46
   3   0   2  294.76   34.31
  -3   0  -2  479.78   63.57
   3   0   2  343.05   48.91
  -3   0  -2  519.72   42.69
   3   1   2  941.58   78.49
   2   1  -3  246.99   45.00
   2   1  -3  284.47   33.50
   3   1   2 1072.18   96.53
  -3   1  -2  342.14   54.47
  -3   1  -2  351.35   37.29
  -2   1   3  113.24   27.42
   3   1   2 1010.97   98.01
  -3   1  -2  407.37   63.44
  -2   1   3  105.75   25.00
  -3   1  -2  328.93   45.79
  -3   2  -2  109.59   33.94
  -3   2  -2   83.96   27.90
   3   2   2   98.01   35.48
   3   2   2   91.98   31.61
  -3   2  -2   72.49   27.04
   3   3   2  622.12   96.74
   3   3   2  580.79   87.09
  -3   3  -2  780.56   93.91
   3   3   2  697.93   59.35
   2   3  -3  233.99   52.28
  -2   3   3  323.19   62.48
  -3   4  -2  758.40   53.28
   3   4   2  805.60  119.95
   3   4   2  867.15   83.52
  -3   4  -2 1050.37  125.15
   3   5   2   67.09   31.72
  -2   5   3  170.87   53.16
   3   5   2   48.64   33.23
  -3   5  -2  367.88   78.90
  -3   5  -2  269.11   38.51
  -3   6  -2  251.47   72.23
  -2   6   3   70.30   34.18
  -3   6  -2  215.83   41.91
   3   6   2  317.88   67.23
  -3   7  -2  379.63   97.28
  -2   7   3  126.97   51.76
   2   7  -3  108.14   54.20
  -3   7  -2  312.93   61.07
   3   7   2  568.92  101.51
  -2   8   3   33.07   28.94
   2   8  -3   92.45   53.48
  -3   8  -2   21.02   16.17
  -3   8  -2   26.55   20.03
   3   9   2  155.41   68.87
   2   9  -3  112.82   60.99
  -3   9  -2  132.26   70.66
  -2   9   3   71.42   47.13
  -2  10   3   69.62   44.71
   2  10  -3    6.22   13.69
  -3  10  -2   96.57   57.12
   2  11  -3   77.53   53.25
   3  11   2  183.24   80.97
  -3  11  -2  371.49  133.89
  -2  11   3  278.92   96.85
   3  12   2   67.72   54.43
  -3  12  -2    6.24   17.58
  -2  12   3   63.94   50.50
   2  12  -3   67.86   50.88
  -2  13   3  144.90   74.52
   3  13   2  232.59   98.06
  -3  13  -2  240.30  109.11
   2  13  -3   -7.97   29.66
  -2  14   3   -6.98   24.51
   2  14  -3   20.68   33.11
  -3  14  -2   18.67   30.15
   3  15   2   30.84   38.69
   2  15  -3   82.98   56.24
  -3  15  -2  219.99  114.23
  -2  15   3   94.90   64.29
  -2  16   3   76.20   64.65
   2  16  -3   91.93   70.85
  -3  16  -2   25.29   13.14
   3  16   2    8.14   19.12
  -3  17  -2   56.27   55.44
  -2  17   3    6.78   22.68
   2  17  -3   15.22   33.16
   1 -17  -3   30.91   35.49
  -3 -17  -1   58.09   46.48
  -1 -17   3   21.47   24.38
   1 -16  -3   83.54   56.93
  -3 -16  -1   25.69   35.08
  -1 -16   3   14.76   10.82
  -3 -15  -1    6.56   18.66
   1 -15  -3   18.24   17.68
   3 -14   1   -0.45    9.19
  -3 -14  -1  238.34  107.29
   1 -14  -3    9.94    4.41
  -1 -14   3  265.73   90.23
   3 -13   1  205.32   73.74
   1 -13  -3   10.01   20.62
  -3 -13  -1  140.01   82.82
  -1 -13   3   46.58   37.35
   1 -12  -3  155.87   67.67
  -1 -12   3   76.45   45.41
  -3 -12  -1   43.81   40.17
   3 -12   1  158.77   61.51
   3 -11   1  170.13   61.14
   1 -11  -3    2.15    2.94
  -3 -11  -1  129.16   69.24
  -1 -11   3  184.31   66.23
   1 -10  -3   41.15   26.73
   3 -10   1   53.54   31.58
   3  -9   1  190.58   58.23
  -1  -9   3  163.57   56.54
   1  -9  -3    0.11    3.10
   3  -8   1  449.45   83.16
   1  -8  -3  366.64   87.93
  -1  -8   3  268.79   70.54
  -3  -8  -1  190.65   70.01
   1  -7  -3  161.95   55.18
  -3  -7  -1  219.85   75.69
   3  -7   1  115.26   40.05
   1  -6  -3   49.22   25.97
   3  -6   1   83.31   27.56
   1  -5  -3  136.51   41.36
   3  -5   1   78.85   25.17
   3  -4   1  892.06   62.11
  -1  -4   3  819.28   92.08
   3  -3   1  165.04   44.29
   3  -3   1  168.08   42.05
  -3  -3  -1  142.06   40.11
  -3  -2  -1 2934.47  177.28
  -3  -2  -1 2482.23  128.01
   1  -2  -3  250.33   47.46
   3  -2   1 1930.26  141.44
  -1  -2   3  128.91   33.24
   3  -2   1 1747.71  123.56
  -3  -2  -1 2643.96  156.12
   3  -1   1   80.95   25.33
  -3  -1  -1  610.67   61.35
   3  -1   1   78.08   26.13
  -3  -1  -1  641.77   66.89
   1  -1  -3 3076.73  128.92
   1  -1  -3 3636.63  174.96
  -3  -1  -1  764.90   77.91
  -1  -1   3 4304.25  188.22
   3   0   1 1040.48   84.20
  -3   0  -1 1391.97  107.79
  -3   0  -1 1311.43   64.80
   3   0   1  976.74   79.95
   1   0  -3 1182.36   86.06
  -1   0   3 1140.94   83.03
   3   0   1  870.02   65.45
   3   0   1 1133.17   63.93
  -3   0  -1 1136.82   85.95
   1   0  -3 1023.30   72.00
  -3   0  -1  961.64   68.17
  -1   0   3 1130.57   72.45
   3   1   1  691.56   69.35
  -3   1  -1   80.94   29.11
  -1   1   3 3547.83  162.19
   1   1  -3 3805.29  162.26
   3   1   1  617.64   59.22
  -3   1  -1   79.79   23.74
   3   1   1  600.02   63.89
   1   1  -3 4190.62  153.47
  -3   1  -1   90.19   22.42
  -1   2   3  186.98   45.43
  -3   2  -1 2056.84  133.87
   3   2   1 3260.73  181.95
   1   2  -3  159.01   36.14
  -3   2  -1 1849.68  131.72
   3   2   1 2625.46  153.68
   3   3   1  170.77   35.50
   3   3   1  165.49   46.25
   3   3   1  133.17   40.88
  -3   3  -1  169.09   47.37
   3   4   1 2485.04  190.38
  -1   4   3   26.28   16.47
  -3   4  -1 1314.22  152.83
   3   4   1 2540.77  194.86
   1   4  -3 1145.83  126.59
   3   4   1 2651.51  157.88
  -3   5  -1   74.75   22.26
  -3   5  -1   87.57   46.36
  -1   5   3  130.54   43.73
  -3   6  -1   95.23   50.35
  -1   6   3   62.32   30.65
  -3   6  -1   76.95   26.72
   3   7   1  203.65   63.36
  -1   7   3  186.64   59.87
  -3   7  -1  111.82   56.40
  -3   7  -1   81.97   30.77
   1   8  -3  300.94   91.79
  -1   8   3  422.14   95.11
   3   8   1  179.31   62.13
  -3   8  -1  421.04   76.41
  -3   8  -1  577.34  139.06
   1   9  -3  161.60   70.83
  -1   9   3   14.61   19.88
  -3   9  -1  167.79   82.95
  -1  10   3   72.24   50.72
  -3  10  -1   99.92   61.45
   1  11  -3  217.65   91.18
  -1  11   3   17.52   20.53
  -3  11  -1  225.81  101.67
   3  11   1  121.97   64.67
   3  12   1   31.97   27.70
   1  12  -3   99.86   64.99
  -1  12   3  198.35   84.23
  -3  12  -1  227.99  102.97
   3  13   1  186.72   93.94
  -3  13  -1  272.86  110.33
  -1  13   3    6.73   19.52
   1  13  -3   34.60   40.73
   3  14   1  329.71  128.18
  -1  14   3    9.90   19.18
  -3  14  -1    9.80   33.05
   1  14  -3  324.38  126.70
   3  15   1   -8.31   31.60
  -1  15   3   48.28   50.20
   1  15  -3  158.56   86.45
  -3  15  -1  116.31   79.06
   1  16  -3   11.27   15.02
  -3  16  -1   11.16   12.78
   3  16   1   18.67   34.20
   1  17  -3   33.79   47.14
  -3  17  -1  112.40   88.88
   3  17   1   64.13   61.35
  -1  17   3   29.83   39.52
  -3 -17   0  -18.02   45.47
   0 -17  -3   23.42   14.80
   0 -16   3   62.85   48.94
   0 -16  -3   34.03   36.08
  -3 -16   0  -13.17   28.76
   0 -15  -3  119.69   72.35
  -3 -15   0   21.00   32.84
   3 -15   0    8.16   12.77
   0 -15   3  104.99   60.93
   0 -14   3   18.93   20.35
   3 -14   0    1.60    7.37
   0 -14  -3  -12.99   28.81
  -3 -14   0   27.40   32.25
   3 -13   0   24.42   18.01
   0 -13  -3   28.92   27.00
  -3 -13   0   89.56   60.82
   0 -13   3   52.30   37.57
   0 -12   3  145.06   60.83
   0 -12  -3   90.92   53.22
  -3 -12   0   40.01   36.30
  -3 -11   0  136.86   74.58
   0 -11   3  276.16   76.21
   0 -11  -3  235.23   81.74
   3 -11   0   45.79   32.11
   0 -10   3  181.75   60.23
   3 -10   0    2.61   12.59
  -3 -10   0  228.37   84.45
   0 -10  -3  162.08   61.69
   0  -9   3  148.08   53.35
  -3  -9   0   20.88   33.96
   0  -9  -3  117.16   47.78
   3  -9   0    9.68   12.26
  -3  -8   0   -0.85    4.17
   0  -8  -3  145.90   56.60
   0  -8   3  127.68   45.27
   0  -7   3  969.52  117.90
  -3  -7   0  130.70   60.90
   3  -7   0    2.81    6.99
   0  -7  -3  981.91  140.41
   0  -6   3 1880.09  160.01
  -3  -6   0  242.39   73.94
   0  -6  -3 1500.47  156.89
   0  -5  -3  448.44   86.56
   3  -5   0  610.74   62.28
   0  -5   3  402.84   66.51
   0  -5  -3  375.22   74.58
   0  -4  -3  779.21   98.53
   3  -4   0  846.49   67.26
   3  -4   0  979.42  120.78
   0  -4  -3  965.69  107.70
   0  -4   3  841.08   88.71
  -3  -3   0 2080.91  174.25
   0  -3  -3  397.54   56.80
   3  -3   0 2191.82  172.32
   0  -3   3  451.92   61.27
   0  -2  -3 2773.21  141.92
   0  -2  -3 2475.32  165.41
  -3  -2   0  481.42   53.07
  -3  -2   0  629.89   83.67
   0  -2   3 2879.32  116.48
   0  -2   3 3304.04  146.02
   3  -1   0 3922.27  109.10
  -3  -1   0 3950.53  140.12
   0  -1   3 1388.31   95.71
  -3  -1   0 5110.28  196.58
   0  -1   3 1452.34   74.59
   3  -1   0 3883.00  151.06
   0  -1  -3 1246.38  109.63
   0  -1   3 1245.73   88.36
   3  -1   0 4058.85  174.91
  -3  -1   0 5155.72  173.50
   3   0   0   20.94   10.84
   0   0   3   -1.00    3.10
   0   0  -3   -0.47    2.98
   3   0   0   27.45   13.30
   3   0   0   24.50    9.82
   0   0   3   -1.86    2.74
  -3   0   0   23.79   11.94
   0   0  -3    0.83    2.32
  -3   0   0   18.64   12.67
   3   0   0   19.46    8.23
  -3   0   0   20.56    9.66
   0   0  -3    0.68    4.53
   0   1   3 1150.99   94.91
   0   1  -3 1487.59   80.00
  -3   1   0 3799.76  100.32
   3   1   0 5785.26  229.85
   3   1   0 4126.00  131.09
  -3   1   0 4366.10  163.39
   0   1  -3 1531.27  103.27
  -3   1   0 4195.56  180.94
   0   1  -3 1426.86  101.20
   3   1   0 4078.27  140.92
  -3   2   0    2.08    3.77
   3   2   0  580.64   76.85
   0   2  -3 2994.98  141.27
   0   2   3 3138.46  192.12
   3   2   0  606.74   70.69
   0   3   3  427.15   60.96
  -3   3   0 1954.86  148.99
   3   3   0 1663.87  141.66
   0   3  -3  455.92   61.89
   0   3   3  390.12   73.93
   3   4   0   12.85   12.61
   3   4   0   11.63   17.41
   0   4  -3  958.50  101.69
  -3   4   0  990.27  120.78
   0   4   3  854.24   94.67
   0   5  -3  439.27   79.36
   0   5  -3  374.16   90.42
   0   5   3  400.47   71.99
   0   6   3 1832.44  165.59
   3   6   0  211.11   58.66
  -3   6   0    4.89    9.62
   0   6  -3 1781.64  210.47
  -3   7   0   -2.78   13.41
   0   7  -3  955.49  153.76
   3   7   0  118.65   48.10
   0   7   3 1029.39  140.83
   0   8  -3  152.11   65.25
   3   8   0   -1.77    9.37
   0   8   3  136.04   56.72
   0   9   3  166.90   65.89
  -3   9   0   22.89   29.97
   0   9  -3  107.67   58.53
   3   9   0   12.90   23.38
   0  10  -3  250.37   91.73
   3  10   0  217.98   80.53
  -3  10   0   10.10   26.37
   0  10   3  190.87   74.04
   0  11   3  334.33  104.26
   3  11   0  151.40   76.91
   0  11  -3  300.59  111.99
  -3  11   0   59.60   52.87
   0  12  -3  126.76   74.95
   3  12   0   34.96   41.50
   0  12   3  168.24   78.22
   3  13   0  111.60   70.75
  -3  13   0   31.59   35.81
   0  13  -3   37.53   41.39
   0  13   3   60.73   48.20
   0  14   3   16.30   21.01
   3  14   0    6.81   26.44
  -3  14   0   15.53   22.79
   0  14  -3   16.28   25.99
   0  15  -3  148.31   94.22
   3  15   0    3.07   17.69
  -3  15   0    1.08   13.90
   0  15   3  162.30   86.31
   0  16  -3   11.30   21.75
   0  16   3   27.97   34.87
   3  16   0   -8.76    7.14
  -3  17   0   14.61   24.05
   3  17   0   18.48   40.39
   0  17  -3    1.60   23.75
   0  17   3   -5.65   12.46
  -1 -17  -3   45.18   49.54
  -3 -17   1   99.65   81.56
  -1 -16  -3   18.83   13.81
  -3 -16   1   48.72   62.91
  -3 -15   1    9.85   30.58
   3 -15  -1   72.28   46.25
  -1 -15  -3  125.96   75.59
   1 -15   3   34.84   31.57
   1 -14   3   19.19   27.75
  -1 -14  -3  261.45   99.36
   3 -14  -1   11.70   19.41
  -3 -14   1  294.52  115.16
  -3 -13   1  209.49   94.25
  -1 -13  -3   26.36   24.97
   1 -13   3   -1.20    6.04
   3 -13  -1  201.94   77.77
   3 -12  -1  174.40   65.85
  -3 -12   1   43.17   35.00
   1 -12   3  206.34   67.40
  -1 -12  -3   66.59   41.94
  -3 -11   1  121.82   63.78
   1 -11   3   13.98   16.54
   3 -11  -1  146.71   54.44
  -1 -11  -3  198.76   76.19
   1 -10   3   58.04   31.39
   3 -10  -1   55.80   32.25
   3  -9  -1  135.47   48.26
  -1  -9  -3  120.15   53.38
   1  -9   3    9.49   16.16
  -1  -8  -3  256.37   73.79
  -3  -8   1  189.50   68.83
   1  -8   3  381.81   76.53
   3  -8  -1  360.97   70.19
   3  -7  -1   74.99   30.05
   1  -7   3  169.13   49.59
  -3  -7   1  208.08   66.05
   1  -6   3   57.94   25.49
   3  -6  -1   78.75   29.76
   3  -5  -1   82.68   27.63
   1  -5   3  130.51   33.49
  -1  -5  -3  434.87   81.96
  -1  -5  -3  532.39   82.75
  -1  -4  -3  847.65  109.05
  -1  -4  -3  998.73  105.75
   1  -3   3  573.48   69.90
   1  -3   3  545.03   61.95
  -1  -3  -3 1446.20  127.17
  -1  -3  -3 1669.78  114.72
   3  -3  -1  179.46   47.36
  -3  -3   1  211.37   55.18
   1  -2   3  293.85   51.65
   3  -2  -1 1861.99   82.59
  -1  -2  -3  143.41   28.56
  -3  -2   1 3491.39  183.80
   1  -2   3  219.39   33.97
  -3  -2   1 2771.13  115.86
   3  -2  -1 1753.07  120.39
  -1  -2  -3  132.79   45.11
   3  -2  -1 1906.53  130.14
   3  -1  -1   80.47   23.80
  -3  -1   1  813.35   78.87
   3  -1  -1   83.11   24.88
   1  -1   3 4085.06  161.73
  -1  -1  -3 3572.61  188.52
   1  -1   3 3483.61  160.43
  -3  -1   1  617.50   51.68
  -1  -1  -3 2930.69  119.50
   3  -1  -1   73.74   19.08
   3   0  -1 1443.17   94.31
   1   0   3 1092.46   87.32
  -3   0   1 1058.11   76.55
  -3   0   1 1034.27   76.18
   3   0  -1 1315.29   91.95
  -1   0  -3 1318.87  106.73
   1   0   3 1069.62   68.23
  -1   0  -3  967.79   63.86
  -1   1  -3 3422.65  136.48
   3   1  -1 1078.71  105.10
  -1   1  -3 4293.60  193.11
   1   1   3 2877.22  152.54
   3   1  -1  636.97   49.81
  -3   1   1   65.03   20.93
  -3   1   1   77.19   19.47
  -1   1  -3 3678.85  136.31
  -1   2  -3  216.94   37.92
  -1   2  -3  293.85   53.07
  -1   2  -3  262.71   38.84
   1   3   3 1353.43  100.10
  -1   3  -3  625.75   63.96
   3   3  -1  192.57   53.46
   1   3   3 1499.51  154.11
  -3   3   1  182.73   45.14
   1   4   3  787.73   86.01
  -1   4  -3   20.13   20.08
  -3   4   1 1206.82  126.56
   1   4   3  743.37  114.56
  -1   4  -3   24.18   16.67
  -1   5  -3  152.15   45.56
  -1   5  -3  162.50   55.66
  -3   5   1   86.53   37.33
  -1   6  -3   50.58   28.03
  -1   6  -3   47.91   32.83
  -3   6   1  103.19   47.37
   3   7  -1  225.04   70.51
  -1   7  -3  172.41   63.73
  -3   7   1  131.86   56.88
  -1   8  -3  354.08   97.56
  -3   8   1  464.63  113.67
   3   8  -1  199.14   68.42
   1   8   3  317.96   85.07
  -1   9  -3    0.02   11.86
   1   9   3  204.99   74.73
  -3   9   1  221.77   85.95
   3  10  -1  650.72  142.60
  -3  10   1   59.59   49.74
  -1  10  -3   61.85   47.92
   1  10   3  422.77  113.73
   3  11  -1  112.70   67.00
  -1  11  -3   24.28   28.33
   1  11   3  254.00   94.21
  -3  11   1  249.56  102.87
  -1  12  -3  179.57   86.19
  -3  12   1  209.47   93.74
   1  12   3   99.37   58.37
   3  12  -1   44.82   47.45
  -1  13  -3   -0.05   20.02
   1  13   3   50.61   46.06
  -3  14   1   17.42   31.62
   1  14   3  291.84  112.51
   3  14  -1  267.76  117.75
  -1  14  -3   23.04   47.90
   3  15  -1   -3.90   28.86
   1  15   3  189.31   94.42
  -1  15  -3   12.71   34.65
  -3  15   1  130.52   78.63
   3  16  -1   41.18   33.46
  -3  16   1    6.75    7.48
   1  16   3   32.41   47.37
   3  17  -1   99.68   82.36
  -3  17   1   71.51   61.17
  -1  17  -3   58.35   61.18
   1  17   3   16.93   31.96
  -3 -17   2  109.01   71.39
  -2 -17  -3   14.59   30.30
  -3 -16   2   22.57   33.43
  -2 -16  -3   53.61   49.56
  -2 -15  -3   49.26   41.69
  -3 -15   2   17.01   15.76
  -2 -14  -3   35.86   40.42
   2 -14   3    7.19   18.78
   3 -14  -2   10.06   13.99
   3 -13  -2  132.56   58.92
  -3 -13   2  229.88  102.65
   2 -13   3  129.80   54.95
  -2 -13  -3    6.52   18.88
   2 -12   3   63.44   35.69
  -3 -12   2   66.56   51.38
   3 -12  -2   17.95   20.88
  -2 -12  -3   62.82   45.02
  -3 -11   2  154.84   77.37
  -2 -11  -3   55.02   42.14
   2 -11   3  272.57   71.58
   3 -11  -2  239.73   72.20
   2 -10   3   66.11   31.65
   3 -10  -2   65.15   33.94
  -2 -10  -3   -1.45   13.11
  -2  -9  -3  101.36   49.59
   2  -9   3   66.60   33.28
   3  -9  -2  104.76   41.42
  -3  -9   2  173.94   76.45
   2  -8   3   35.40   21.78
  -2  -8  -3   70.53   41.42
   3  -8  -2   26.99   18.45
   2  -7   3  113.52   36.96
  -2  -7  -3   66.02   36.02
   3  -6  -2  259.50   57.87
  -2  -6  -3  444.03   79.19
  -3  -6   2  366.69   94.52
  -2  -6  -3  411.28   91.01
  -2  -5  -3   33.38   24.35
  -3  -5   2   63.09   29.67
  -2  -5  -3   48.63   24.31
  -3  -4   2  795.77  102.13
   2  -4   3  313.65   44.73
  -2  -4  -3  705.79  102.34
  -2  -4  -3  804.54   83.83
   2  -4   3  293.87   58.03
   3  -3  -2  764.48   93.72
  -2  -3  -3  249.02   40.87
   2  -3   3  309.74   56.39
  -2  -3  -3  203.42   56.02
   2  -3   3  308.73   38.75
  -2  -3  -3  184.69   50.79
  -3  -3   2  675.14   90.60
   2  -2   3  265.67   48.96
  -3  -2   2  112.03   33.54
  -2  -2  -3  262.05   31.56
   3  -2  -2   88.21   22.71
   3  -2  -2   95.93   31.12
  -3  -2   2   92.70   19.61
  -2  -2  -3  235.23   48.36
  -2  -2  -3  218.06   39.66
  -2  -2  -3  251.31   61.32
   2  -1   3  111.38   31.63
  -2  -1  -3  235.38   51.55
  -3  -1   2 1034.94   63.43
   3  -1  -2  335.43   43.76
  -2  -1  -3  196.01   35.61
   2  -1   3  131.23   34.12
   3  -1  -2  367.28   47.71
  -3  -1   2 1045.91   90.56
   3   0  -2  425.49   52.69
   2   0   3 2945.64  135.36
   2   0   3 2822.55  150.13
  -2   0  -3 3106.60  179.46
  -3   0   2  385.84   43.82
  -3   0   2  386.32   51.36
   3   0  -2  497.29   47.54
  -2   0  -3 2230.74  114.52
  -2   1  -3  127.75   31.63
  -2   1  -3  169.14   41.30
   2   1   3  206.81   38.39
  -3   1   2  444.22   51.24
   3   1  -2  892.29   50.99
   3   1  -2 1173.35  102.76
   2   1   3  209.37   45.53
  -2   2  -3  310.23   40.49
  -2   2  -3  226.36   52.53
   2   2   3  240.20   52.39
   3   2  -2  108.41   32.14
  -2   2  -3  322.68   60.13
  -2   2  -3  244.29   45.08
   2   3   3  191.27   54.05
  -2   3  -3  319.54   66.63
   2   3   3  185.49   33.20
  -2   3  -3  356.85   43.74
  -2   4  -3  441.51   55.34
  -3   4   2 1287.04  134.27
  -2   4  -3  415.10   77.80
   2   4   3  808.94   78.13
   2   4   3  903.81  131.54
   2   5   3   69.88   28.11
   2   5   3   55.55   31.36
  -2   5  -3  171.80   43.15
  -2   5  -3  123.96   49.60
  -2   6  -3   53.69   36.14
  -2   6  -3   51.45   27.20
  -2   7  -3  100.87   49.42
   2   7   3  127.26   48.74
  -2   7  -3   73.91   33.32
  -2   8  -3   70.42   49.10
   2   8   3   48.73   30.78
  -3   8   2    6.56   14.66
  -3   9   2  147.39   64.44
   3   9  -2  140.77   62.16
   2   9   3  135.84   58.01
  -2   9  -3   52.36   50.17
   2  10   3   10.06   23.23
  -2  10  -3   90.01   56.58
  -3  10   2   71.38   49.91
   2  11   3  131.18   67.05
  -3  11   2  378.48  118.28
  -2  11  -3  240.38   99.05
   3  11  -2  124.82   67.33
  -2  12  -3   85.65   69.71
  -3  12   2   25.55   21.95
   3  12  -2   22.63   30.97
   2  12   3   81.01   54.46
  -3  13   2  180.50   86.34
   2  13   3   25.84   35.86
   3  13  -2  201.41   95.83
  -2  13  -3  160.24   84.57
  -2  14  -3    3.86   28.21
  -3  14   2   20.54   33.84
   2  14   3   23.93   28.00
  -3  15   2  239.03  105.75
  -2  15  -3   83.41   70.64
   3  15  -2   34.88   43.71
   2  15   3   73.29   54.58
  -2  16  -3  101.36   80.47
   2  16   3   94.20   66.86
  -3  16   2   46.20   57.24
   3  16  -2  -13.83   38.25
   2  17   3    6.12   33.63
  -2  17  -3   21.65   34.89
   3  17  -2  131.39   91.11
  -3  17   2   28.59   36.94
  -3 -17  -3  -21.46   39.98
  -3 -17   3   -6.68   26.42
   3 -16  -3  -18.22   32.42
  -3 -16  -3   62.21   55.93
  -3 -16   3   73.39   51.12
  -3 -15   3   85.97   56.78
  -3 -15  -3   86.48   66.55
   3 -15  -3   59.34   42.39
  -3 -14   3    5.74   25.57
  -3 -14  -3   -3.99   23.98
   3 -13  -3   -0.71   21.35
  -3 -13   3   44.52   36.60
   3 -13   3    9.90   18.14
  -3 -13  -3   45.45   45.98
   3 -12  -3   19.12   18.49
   3 -12   3   21.55   18.68
  -3 -12   3   41.10   33.20
  -3 -12  -3   79.95   54.64
  -3 -11  -3  417.39  116.18
   3 -11   3  256.09   65.29
   3 -11  -3  141.23   53.35
  -3 -11   3  423.66  104.37
  -3 -10   3   30.27   29.11
   3 -10   3 1009.67  123.52
  -3 -10  -3   26.97   29.62
   3 -10  -3  682.41  121.33
   3  -9   3  256.53   59.42
  -3  -9   3   14.98   24.62
   3  -9  -3  262.32   74.45
  -3  -9  -3   -0.98    8.66
  -3  -8   3   54.72   34.84
   3  -8  -3  153.60   51.12
  -3  -8  -3   78.72   43.95
  -3  -7   3   66.37   36.16
   3  -7  -3  349.16   77.26
   3  -7   3  396.97   59.11
  -3  -7  -3   80.33   42.30
  -3  -6   3   40.10   25.55
  -3  -6  -3   47.11   25.33
  -3  -6  -3   30.50   21.99
  -3  -5  -3  101.65   30.62
  -3  -5  -3   90.73   41.43
  -3  -5   3   75.44   38.10
   3  -5   3 1978.00  174.50
   3  -5   3 2352.80  117.77
   3  -4   3  867.87   60.27
  -3  -4  -3  242.67   41.83
   3  -4   3  843.66  108.52
  -3  -4  -3  255.54   66.48
  -3  -4   3  249.53   58.57
   3  -3   3 1102.57  131.83
  -3  -3  -3  937.44  128.56
  -3  -3  -3  887.72  113.94
  -3  -3   3  843.83   99.75
   3  -3  -3  797.35   71.76
   3  -3  -3  963.77  112.61
  -3  -3  -3  846.54   63.34
  -3  -3  -3  769.62   88.64
   3  -3   3  945.43  125.25
  -3  -2   3  242.75   26.53
  -3  -2  -3  247.76   44.12
   3  -2  -3  219.67   40.96
   3  -2  -3  222.59   53.00
  -3  -2  -3  287.10   57.57
   3  -2   3  211.73   49.56
  -3  -2   3  322.55   56.38
  -3  -2  -3  341.55   73.85
   3  -1   3 1579.73  125.04
  -3  -1  -3  555.18   84.69
  -3  -1   3  662.89   80.33
   3  -1   3 1423.68  118.17
  -3  -1   3  667.65   47.12
  -3  -1  -3  465.34   60.80
   3  -1  -3 1842.47  128.57
  -3  -1  -3  608.71   77.69
  -3   0  -3  463.74   73.55
   3   0  -3  456.06   40.81
  -3   0  -3  374.76   56.46
  -3   0  -3  378.10   43.07
   3   0   3  395.77   63.32
   3   0  -3  476.78   66.23
  -3   0   3  531.29   73.67
   3   0   3  362.06   54.76
  -3   1  -3 1743.27  144.44
  -3   1   3 1400.82  102.26
  -3   1  -3 1325.09   95.22
  -3   1   3 1336.77   85.64
   3   1  -3  478.82   33.79
  -3   1  -3 1596.66  127.66
   3   1   3  590.17   81.59
   3   1   3  550.87   64.89
   3   1  -3  638.81   79.64
   3   2   3  265.79   56.56
  -3   2  -3  165.80   41.85
  -3   2  -3  214.60   28.27
  -3   2  -3  200.09   46.00
  -3   2  -3  242.21   51.84
  -3   3  -3  858.89  101.24
   3   3   3  794.28  116.05
   3   3   3  824.27   58.22
   3   3   3  747.58   99.80
  -3   3  -3  797.90  102.33
  -3   3  -3  884.97   58.02
   3   4   3  237.63   39.54
  -3   4   3  929.55  117.47
  -3   4  -3  683.17  102.57
  -3   4  -3  790.27   65.33
   3   4   3  233.39   70.16
   3   5   3   83.01   30.43
   3   5   3   79.48   43.86
  -3   5   3 2197.44  196.68
  -3   5  -3 2401.11  145.51
  -3   5  -3 2182.28  200.80
  -3   6  -3  469.36   64.96
  -3   6   3  705.83  116.14
   3   6   3   27.30   18.20
  -3   6  -3  672.66  122.32
   3   6   3   33.61   29.03
  -3   7   3  421.21   98.16
  -3   7  -3  305.25   59.02
   3   7   3   63.75   32.82
  -3   7  -3  372.67   96.07
   3   7   3   56.73   38.95
  -3   8  -3  162.25   75.15
  -3   8  -3  112.91   38.62
   3   8   3   54.05   30.89
  -3   8   3  212.94   72.27
   3   8  -3  116.45   59.03
  -3   9  -3  257.29   92.07
  -3   9   3  207.62   77.12
   3   9   3   11.16   19.56
   3   9  -3    9.22    7.40
  -3  10   3  861.35  160.02
  -3  10  -3  882.09  175.37
   3  10  -3   41.04   35.94
   3  10   3   41.18   34.56
   3  11   3  495.81  123.76
   3  11  -3  513.98  139.91
  -3  11  -3  231.20   99.96
  -3  11   3  234.57   84.58
  -3  12   3   20.56   28.21
   3  12  -3  121.13   72.94
   3  12   3   62.85   45.76
  -3  12  -3   40.15   47.87
  -3  13  -3   25.28   43.72
   3  13  -3   75.27   57.58
  -3  13   3   -8.35   16.48
   3  13   3   58.20   46.80
   3  14  -3   14.67   31.21
  -3  14   3  145.30   78.59
  -3  14  -3  199.36  106.80
   3  14   3    8.67   21.08
   3  15   3  127.75   79.15
   3  15  -3  137.32   91.30
  -3  15   3   72.53   59.32
  -3  15  -3  104.86   71.79
   3  16  -3   88.11   68.95
   3  16   3   84.08   66.71
  -3  16  -3   21.91   25.48
  -3  16   3   21.31   24.54
  -3  17  -3    4.03   31.07
   3  17  -3  -22.77   41.71
  -3  17   3   36.31   39.08
   3  17   3   14.41   33.21
  -3 -17   4   40.69   43.28
  -4 -17  -3    9.81   17.32
   3 -16  -4   10.88   14.45
  -3 -16   4  111.12   68.15
  -4 -16  -3  143.74   91.50
  -4 -15  -3  103.00   75.21
   3 -15  -4    0.30   17.28
  -4 -14  -3   11.66    9.49
   3 -14  -4    4.18   20.94
  -4 -13  -3   35.20   40.89
   3 -13  -4    5.32   14.33
  -3 -13   4   -4.81   18.89
  -4 -12  -3  157.21   76.41
   4 -12   3  406.31   84.27
   3 -12  -4   22.20   17.95
  -3 -12   4  292.28   94.81
  -3 -11   4  443.19  111.88
  -4 -11  -3  435.72  121.66
   4 -11   3  419.92   79.10
   4 -10   3  231.09   54.26
  -4 -10  -3  103.32   57.67
  -3 -10   4  119.14   56.90
   3 -10  -4  106.38   50.76
   3  -9  -4   45.30   29.43
  -4  -9  -3   39.88   37.73
  -3  -9   4   40.53   32.58
  -3  -8   4  349.39   90.17
   3  -8  -4  213.97   67.72
  -4  -8  -3  376.96   97.65
   3  -7  -4    2.78    6.18
   4  -7   3  774.64   67.77
   4  -7   3  750.67  127.09
  -4  -7  -3  362.23   82.93
  -4  -7  -3  311.57   86.51
  -3  -7   4  841.70  132.04
  -4  -6  -3  101.42   39.09
   4  -6   3  605.91   56.61
   4  -6   3  600.05  105.56
  -3  -6   4  638.70  106.12
  -4  -6  -3   88.10   43.53
   4  -5   3  703.12  109.50
  -4  -5  -3  115.68   43.61
   4  -5   3  658.73   49.05
  -3  -5   4    9.45    4.69
  -4  -4  -3  698.66  104.00
  -3  -4   4  671.79   98.54
   3  -3  -4  219.17   44.92
  -3  -3   4  257.72   57.90
   4  -3   3  274.92   63.62
   4  -3   3  227.38   62.39
  -3  -2   4  476.55   77.28
   4  -2   3 1008.66  120.93
  -4  -2  -3  507.94   96.41
   4  -2   3  912.44  106.69
  -4  -2  -3  389.40   71.87
   4  -1   3  788.46   95.86
  -4  -1  -3   16.75   13.23
   3  -1  -4    8.85   12.26
   4  -1   3  774.37   96.96
  -4  -1  -3   25.37   17.70
  -3  -1   4  152.80   41.44
   4  -1   3  754.49   85.12
  -4  -1  -3   28.08   20.40
   3   0  -4  225.17   36.14
  -4   0  -3  954.30   68.00
  -4   0  -3  764.98   79.18
   3   0  -4  273.97   31.94
  -4   0  -3  940.93  114.41
   4   0   3  730.86   84.19
   3   0  -4  245.10   49.71
  -3   0   4  217.55   46.99
  -3   0   4  199.33   27.35
  -4   0  -3  868.90  103.23
   4   0   3  845.60  100.32
  -4   1  -3  786.74   75.00
   4   1   3   31.43   18.84
  -4   1  -3  848.41  101.65
   4   1   3   31.13   17.28
   3   1  -4  126.20   23.87
  -3   1   4   11.74    9.08
  -4   1  -3  823.80   73.14
   3   1  -4  126.13   37.07
  -3   1   4   11.58   10.05
  -4   1  -3  917.40  109.42
  -4   2  -3  812.12  102.22
   4   2   3  273.98   56.17
   3   2  -4  372.56   44.75
   4   2   3  261.41   59.41
   4   2   3  269.06   57.91
  -4   2  -3  691.98   83.13
  -4   3  -3  199.66   53.82
  -4   3  -3  155.65   23.66
   4   4   3 1010.53  144.18
   4   4   3 1099.77   82.02
  -4   4  -3  830.04  113.79
  -3   5   4  121.00   50.87
   4   5   3  131.31   34.38
   4   5   3  129.73   56.38
   4   6   3  198.62   51.10
   4   6   3  192.36   72.79
  -4   6  -3  325.48   44.40
   4   7   3  441.98   88.55
   4   7   3  354.45  103.14
  -3   7   4   -0.13    9.40
  -4   7  -3  646.96   73.35
  -4   7  -3  918.16  153.07
  -4   8  -3   55.50   40.91
   3   8  -4  312.45  104.31
   4   8   3  504.27  105.53
  -4   8  -3   28.31   19.42
  -3   8   4  260.00   82.67
   4   8   3  436.13  120.96
  -4   9  -3  408.42  121.15
   4   9   3   61.12   38.17
   4   9   3   41.39   26.94
  -3   9   4   49.66   40.78
  -4   9  -3  342.17   71.07
   3   9  -4   28.72   28.98
   4  10   3  137.46   72.08
   3  10  -4  142.37   79.34
  -4  10  -3  267.48  105.53
   4  10   3  153.60   65.15
  -3  10   4  150.83   67.62
   4  11   3  607.14  163.87
  -4  11  -3  555.20  155.37
   4  11   3  587.95  134.59
  -3  11   4   10.91   17.00
   3  11  -4  473.43  141.50
  -3  12   4   24.15   26.60
   4  12   3  181.27   79.38
   3  12  -4  295.49  112.58
  -3  13   4    0.56   15.49
   4  13   3   41.68   40.54
   3  13  -4    9.68   23.50
   4  14   3   25.03   27.75
  -3  14   4   -9.95   36.98
  -4  14  -3   96.12   75.61
   3  14  -4   72.09   60.52
  -3  15   4   -1.82   28.58
   3  15  -4  169.73   98.65
  -4  15  -3  162.29  100.80
   4  15   3  119.81   77.00
   4  15   3   89.95   88.75
   4  16   3  100.59   79.02
  -4  16  -3   64.36   67.55
   4  16   3   72.01   62.41
  -3  16   4  -19.95   45.59
   3  16  -4  102.94   78.74
  -3  17   4   -2.44   20.60
   3  17  -4   58.56   69.16
  -4  17  -3   31.24   41.59
   4  17   3   44.15   79.96
   4  17   3   13.38   29.00
   2 -17  -4   48.68   55.21
  -4 -17  -2   12.50   21.42
  -2 -17   4   63.45   51.61
   2 -16  -4   -8.89   21.30
  -2 -16   4    6.12   12.70
  -4 -15  -2   34.12   39.48
   2 -15  -4   48.65   38.63
  -2 -15   4   34.70   38.02
  -4 -14  -2   80.77   65.05
  -2 -14   4  152.21   74.13
   2 -14  -4  155.27   72.80
  -2 -13   4   53.67   38.56
   2 -13  -4    5.14    6.34
   2 -12  -4   -3.26    8.40
  -2 -12   4   13.72   19.19
   2 -11  -4   46.70   36.65
  -2 -11   4   71.57   44.64
  -4 -11  -2   69.04   53.49
   4 -10   2   17.52   17.98
  -4 -10  -2  143.04   69.44
   2 -10  -4  186.35   66.48
  -2  -9   4  182.88   67.27
   4  -9   2  452.99   71.83
  -4  -9  -2  242.09   81.99
   2  -9  -4  402.00   98.68
   2  -8  -4   52.32   32.59
  -2  -8   4  155.84   56.65
   4  -8   2   90.77   28.12
  -4  -8  -2   40.53   33.79
   4  -7   2  324.97   47.13
  -4  -7  -2  265.60   79.59
   2  -7  -4  163.63   55.81
  -4  -6  -2   62.69   34.50
   4  -6   2  176.85   30.25
   4  -6   2  185.40   57.65
  -2  -6   4   24.28   20.74
  -2  -5   4  242.85   58.24
  -4  -5  -2  189.54   59.35
  -2  -4   4  155.82   44.30
  -4  -4  -2  132.70   45.83
   4  -4   2  144.00   46.48
   4  -3   2 1085.08  138.80
   4  -3   2  791.82  103.26
  -4  -3  -2  998.03  116.18
  -4  -3  -2 1193.65  137.82
   4  -2   2  317.60   65.29
  -4  -2  -2   91.07   30.11
   2  -2  -4    6.47    6.41
  -2  -2   4    6.01    8.13
   4  -2   2  254.88   50.81
  -4  -2  -2   78.85   29.87
  -4  -2  -2  117.35   42.42
  -2  -1   4 2297.69  161.51
   2  -1  -4 3165.40  169.14
  -4  -1  -2 1357.99  125.53
  -4  -1  -2 1157.12  101.24
   4  -1   2   90.75   35.44
  -4  -1  -2 1125.87   97.85
   4  -1   2   87.12   30.18
   4  -1   2   68.98   22.75
   2  -1  -4 2791.41  155.49
  -4   0  -2   13.24    7.56
  -4   0  -2    9.86    8.73
  -4   0  -2   12.27   16.24
  -2   0   4   69.83   17.96
   2   0  -4   49.80   18.29
   4   0   2   10.87   12.71
   2   0  -4   64.36   24.81
  -4   0  -2   10.52   11.53
   4   0   2    7.96   10.16
   4   0   2    8.29    5.50
  -2   0   4   64.94   24.40
   4   0   2   10.15   12.54
  -4   1  -2   83.53   31.43
   4   1   2 1236.32  110.96
   4   1   2 1235.00  108.24
  -4   1  -2   65.18   18.21
   4   1   2 1215.84   99.85
   2   1  -4 2004.80  104.32
   2   1  -4 2337.73  156.17
  -2   1   4 2922.95  147.89
  -4   1  -2   64.43   27.44
  -4   1  -2   82.45   24.57
   4   2   2  118.05   35.87
   2   2  -4   10.38    8.90
   4   2   2  140.38   35.59
  -4   2  -2  336.91   65.10
   4   2   2  146.63   43.42
  -4   2  -2  429.52   70.90
  -4   2  -2  400.27   66.19
  -2   2   4    4.48    8.56
   2   2  -4    9.68   10.81
   4   3   2 1072.25   71.10
  -4   3  -2 1052.06  125.75
   4   3   2 1237.12  138.18
   4   3   2 1182.42  135.72
   4   4   2  149.67   32.77
  -4   4  -2  174.45   53.95
  -2   4   4   65.82   30.26
   4   4   2  135.36   50.21
   4   5   2  231.16   69.66
  -2   5   4  323.60   72.95
   4   5   2  227.99   48.01
   4   6   2  129.34   41.61
   4   6   2  133.38   54.79
  -4   6  -2  149.71   29.86
  -4   6  -2  182.39   66.86
  -2   6   4   85.62   43.64
  -4   7  -2  494.05  118.01
  -4   7  -2  347.91   54.65
  -2   7   4  198.65   65.64
   4   7   2  337.01   94.50
   4   7   2  405.21   81.98
  -4   8  -2   86.17   60.28
  -2   8   4   56.65   37.55
   2   8  -4  184.06   76.85
  -4   8  -2   69.40   27.98
   4   8   2   70.02   36.19
  -4   9  -2  606.41  153.42
  -4   9  -2  424.99   76.43
   4   9   2  362.63   94.43
   2   9  -4  166.67   77.40
  -2   9   4  422.12  107.58
   4  10   2  135.47   66.86
  -4  10  -2    6.74   19.88
  -2  10   4  216.65   85.44
   4  11   2  111.44   65.20
   2  11  -4  112.69   68.26
  -4  11  -2  212.63   98.57
  -2  11   4   63.30   44.95
  -2  12   4   -2.60    7.23
   4  12   2  224.77   98.15
  -4  12  -2  148.62   89.52
   2  12  -4   19.15   21.11
   2  13  -4   33.46   41.79
  -4  13  -2   37.46   41.70
  -2  13   4   22.03   32.20
   2  14  -4  184.78  101.66
  -2  14   4  189.15   89.81
  -4  14  -2   14.80   25.65
   4  14   2   84.84   61.70
   4  15   2   75.88   59.34
   2  15  -4  -10.57   23.26
  -4  15  -2   19.85   27.71
  -2  15   4   64.00   51.61
  -2  16   4   -2.99   23.17
   4  16   2   51.61   52.10
   2  16  -4  -10.69   40.26
  -4  16  -2   54.00   59.66
   4  17   2    8.50   10.31
  -4  17  -2   49.79   65.52
  -2  17   4   31.22   32.34
   2  17  -4   55.65   59.45
  -1 -17   4   11.38   26.93
  -4 -17  -1  112.27   77.13
   1 -17  -4   73.38   59.22
  -1 -16   4   30.50   35.12
  -4 -16  -1    9.91   17.10
   1 -16  -4   51.49   45.02
  -4 -15  -1    8.70    9.57
  -1 -15   4   16.42   27.55
  -1 -14   4   23.76   29.99
   1 -14  -4   -4.60   22.72
  -4 -13  -1   59.43   49.04
  -1 -13   4   16.66   18.51
   1 -13  -4  169.47   73.20
   4 -13   1   87.64   48.14
  -1 -12   4   44.88   33.52
   1 -12  -4   74.51   48.19
  -4 -12  -1    1.41   14.48
   1 -11  -4  264.24   81.12
  -4 -11  -1  181.06   88.45
  -1 -11   4    6.72   21.87
   4 -11   1    8.37    5.33
  -4 -10  -1  104.26   64.25
   1 -10  -4   10.44   18.43
   4 -10   1   74.79   37.10
  -4  -9  -1  142.29   67.79
  -1  -9   4  171.43   60.35
   4  -9   1   71.63   34.21
   1  -8  -4  118.37   50.98
  -1  -8   4   27.69   24.70
  -4  -8  -1   70.23   44.26
  -1  -7   4   13.65   18.83
   4  -7   1   71.24   27.34
  -4  -6  -1  354.45   88.85
   1  -6  -4 1934.82  183.07
  -1  -6   4 2178.08  174.85
  -1  -5   4  238.06   57.73
   4  -5   1  528.85   50.07
   4  -5   1  711.57  106.73
  -4  -5  -1  225.24   63.56
  -1  -4   4   30.59   19.39
   4  -4   1   57.51   31.18
   1  -4  -4   27.65   19.84
  -4  -4  -1   41.12   25.83
   1  -3  -4  138.60   41.73
   4  -3   1 2828.46  194.43
  -4  -3  -1  993.07   93.86
   4  -3   1 2758.23  186.92
  -4  -3  -1 1028.50  124.77
  -4  -2  -1  140.64   43.51
  -1  -2   4 3362.70  108.35
   4  -2   1  692.04   89.47
   4  -2   1  582.98   85.71
  -4  -2  -1  112.48   30.90
  -4  -2  -1  117.71   38.40
  -1  -2   4 3590.38  195.30
   1  -2  -4 1739.27  145.10
  -4  -1  -1  954.44  100.00
  -1  -1   4  170.72   38.58
   4  -1   1  298.16   34.81
   4  -1   1  445.07   57.06
  -4  -1  -1  814.91   79.98
   4  -1   1  461.88   71.27
  -4  -1  -1  994.21   96.71
   1  -1  -4  154.07   33.89
   1  -1  -4  169.41   41.97
  -1  -1   4  170.30   33.30
   4   0   1  334.05   39.04
  -1   0   4 3106.99  140.84
  -4   0  -1  316.95   59.87
  -4   0  -1  323.53   53.30
  -4   0  -1  312.55   51.05
  -1   0   4 3148.86  155.54
   1   0  -4 3542.43  169.71
   4   0   1  359.24   53.94
   1   0  -4 2802.64   77.56
   4   0   1  305.04   53.00
   1   0  -4 2871.10  141.62
   4   0   1  274.34   42.92
   1   1  -4  172.36   37.43
  -4   1  -1  269.05   48.85
   4   1   1 1003.90   90.02
   4   1   1  876.12   88.97
  -4   1  -1  286.44   43.75
  -1   1   4  139.33   32.86
   1   1  -4  167.36   33.65
  -4   1  -1  240.21   33.22
   4   1   1 1049.54   93.23
  -4   1  -1  281.75   55.21
   4   2   1   97.41   29.78
   4   2   1  104.33   29.91
  -1   2   4 1941.74  154.98
   1   2  -4 3581.17  188.01
  -4   2  -1  486.33   67.54
  -4   2  -1  439.24   70.63
   4   2   1   94.80   33.18
   1   2  -4 3509.54  167.77
   1   3  -4    9.50   12.77
  -1   3   4  131.68   44.15
   4   3   1  948.29  110.43
   4   3   1 1221.19  127.35
  -4   4  -1   52.23   30.65
   1   4  -4   39.76   22.94
  -1   4   4   40.47   25.84
   4   4   1   62.37   31.88
   4   4   1   69.14   28.14
  -1   4   4   35.74   23.14
  -1   5   4  247.30   62.52
   4   5   1  221.10   63.61
   4   5   1  234.70   52.67
   4   6   1  282.13   65.23
  -4   6  -1    5.99   13.33
  -4   7  -1  101.03   55.65
   1   7  -4   10.83   10.85
   1   8  -4   41.07   36.54
   4   8   1   33.51   27.13
   4   9   1  139.15   60.12
   1   9  -4  146.28   71.37
  -4   9  -1   91.79   53.81
  -1  10   4    9.70    9.80
  -4  10  -1  156.25   79.91
   4  10   1   87.68   50.80
   4  11   1   80.68   49.71
   1  11  -4   30.94   40.18
  -4  11  -1   15.07   27.24
   1  12  -4   52.47   49.40
   4  12   1   -6.21   15.47
  -1  12   4   96.32   56.29
   4  13   1   89.44   68.02
  -4  13  -1  108.91   69.08
  -1  13   4  198.42   85.42
   1  13  -4   37.46   40.58
   1  14  -4    9.17    5.82
  -4  14  -1  142.17   81.55
  -1  14   4    5.69   12.64
   4  14   1  172.92   96.56
   1  15  -4   -1.45   21.33
   4  15   1   -3.11   22.85
  -4  15  -1   -3.00   29.38
  -1  16   4   72.64   59.33
   4  16   1   12.09   29.13
   1  16  -4   32.42   30.49
  -4  16  -1   90.25   76.87
   4  17   1  157.46   94.08
   1  17  -4   14.21   42.21
  -4  17  -1   51.02   63.33
  -1  17   4   57.78   57.44
   0 -17  -4    6.13   21.71
  -4 -17   0   53.47   59.52
  -4 -16   0   26.48   41.76
   0 -16  -4    5.37   15.31
   0 -16   4   10.69   21.83
  -4 -15   0   -2.78   24.20
   0 -15  -4   23.01   28.17
   0 -15   4   35.57   37.59
  -4 -14   0  126.56   77.81
   0 -14   4  282.98   93.25
   0 -14  -4  206.57   85.39
   0 -13  -4  163.77   72.12
  -4 -13   0   37.14   37.99
   0 -13   4  216.82   81.65
   4 -13   0   24.55   27.50
  -4 -12   0   -0.68   24.79
   0 -12   4    4.90   15.64
   0 -12  -4    7.19   21.39
   0 -11  -4   14.55   22.18
  -4 -11   0   -2.01   15.59
   0 -11   4   15.42   28.04
  -4 -10   0  121.43   67.10
   0 -10   4  744.39  126.22
   0 -10  -4  561.69  121.30
   4 -10   0   83.03   37.74
  -4  -9   0  382.51  110.02
   0  -9  -4  513.14  113.47
   0  -9   4  627.62  109.42
   0  -8   4   45.13   27.32
   0  -8  -4   38.63   30.05
  -4  -8   0   44.71   35.85
   0  -7  -4  205.58   66.19
   0  -7   4  202.62   53.59
   4  -7   0  199.76   43.32
   0  -6  -4 1143.97  149.54
   0  -6   4 1105.65  121.98
  -4  -6   0  214.37   71.73
   4  -5   0  109.34   25.86
   0  -5  -4   37.82   40.57
   0  -5   4   27.35   23.37
   4  -4   0  726.72   57.03
  -4  -4   0  905.20  133.26
   4  -4   0  698.45   98.41
   0  -4   4  100.78   33.19
   0  -4  -4   80.65   30.38
  -4  -3   0  776.21   78.38
  -4  -3   0  967.08  126.20
   4  -3   0    7.64   10.06
   4  -3   0    4.79    4.03
   0  -3  -4  240.31   50.09
   0  -3   4  192.98   36.99
   4  -3   0   11.78   11.98
   0  -3   4  207.99   43.65
   0  -2  -4   57.42   31.83
  -4  -2   0   17.83   14.34
   0  -2   4   76.31   25.48
   0  -2   4   73.94   19.56
   4  -2   0 5616.13  138.42
  -4  -2   0   16.44   12.83
   4  -2   0 6319.66  284.72
   4  -2   0 6269.64  257.09
  -4  -2   0   11.83   10.06
   0  -1  -4 3496.95  204.34
   4  -1   0 1168.75  109.00
   0  -1   4 2957.21   98.00
  -4  -1   0  293.42   46.08
  -4  -1   0  318.69   56.87
   4  -1   0 1232.12   87.02
   0  -1   4 3196.21  151.64
   0  -1   4 3396.78  159.89
  -4  -1   0  229.67   41.80
   4  -1   0 1102.95   91.82
   0   0  -4  232.77   47.61
   4   0   0 9013.83  235.76
   0   0   4  214.06   41.05
  -4   0   0 8795.85  282.07
   4   0   0 7494.63  236.97
   4   0   0 9999.00  291.89
  -4   0   0 8112.91  224.03
  -4   0   0 8240.94  215.21
   0   0  -4  225.75   38.91
   4   0   0 8246.05  203.51
   0   1   4 3008.39  166.79
  -4   1   0 1097.42   71.81
   4   1   0  289.28   58.06
   0   1  -4 3711.81  173.15
  -4   1   0 1278.97  119.80
   4   1   0  260.68   44.82
  -4   1   0 1190.39   90.82
  -4   1   0 1206.61   96.24
   0   1  -4 3202.19  114.52
   0   1  -4 3402.46  167.00
   4   1   0  264.95   39.86
   4   2   0   17.89   13.29
   0   2  -4   71.06   25.51
   0   2   4   61.21   31.75
   0   2  -4   65.56   23.83
  -4   2   0 5368.88  245.98
  -4   2   0 5599.61  121.65
   4   2   0   15.01   16.52
  -4   2   0 5934.04  236.31
   4   2   0   13.64    9.06
   4   3   0  923.13  105.00
   4   3   0  908.39  112.65
   0   3  -4  262.05   50.01
   0   3   4  202.14   59.31
  -4   3   0   11.39   12.56
   0   4   4   84.20   41.24
   0   4   4   90.64   32.88
   4   4   0  728.46  100.79
   0   4  -4   99.10   35.25
  -4   4   0  831.37  112.22
   0   5  -4   36.46   27.54
   0   5   4   16.01   15.24
   0   5   4   14.59   13.16
  -4   6   0   -1.64   19.56
   4   6   0  209.48   62.34
   0   6  -4 1236.44  178.65
   0   6   4 1108.73  131.42
   0   7  -4  218.83   79.51
  -4   7   0  296.40   87.19
   0   7   4  225.69   63.37
   4   8   0   38.90   30.06
   0   8   4   51.74   33.30
   0   8  -4   47.48   38.52
   4   9   0  350.50   97.75
   0   9  -4  572.43  133.23
   0   9   4  550.75  113.86
   4  10   0   99.60   54.27
   0  10   4  644.77  129.71
   0  10  -4  681.44  153.97
  -4  10   0  118.28   63.72
   0  11  -4   16.08   34.25
   0  11   4   13.96   22.43
   4  11   0    3.06   16.54
   4  12   0    8.49   20.89
   0  12   4   -4.73   22.61
   0  12  -4   14.59   31.66
   4  13   0   23.21   29.09
  -4  13   0   29.24   35.97
   0  13  -4  204.66  102.64
   0  13   4  172.74   76.36
   0  14  -4  282.16  125.34
   4  14   0  210.32   98.48
  -4  14   0    8.02   11.94
   0  14   4  268.69  104.27
  -4  15   0   63.94   64.60
   0  15   4   25.59   29.20
   0  15  -4   50.52   50.04
   4  15   0   12.04   14.26
   0  16   4   -1.61    6.59
   4  16   0    8.66   11.88
   0  16  -4   -0.37    8.80
   0  17  -4   13.36   39.72
   0  17   4   -0.68   12.43
  -4  17   0   41.14   57.65
   4  17   0   28.29   40.88
  -4 -17   1  160.20   97.20
  -1 -17  -4   30.49   43.06
  -4 -16   1    4.37   15.50
  -1 -16  -4   15.60   29.12
  -4 -15   1   -1.04   32.36
  -1 -15  -4   -8.17   33.73
   4 -14  -1  100.69   58.31
   1 -14   4   19.03   28.84
  -1 -14  -4   19.30   28.59
   4 -13  -1   90.24   46.63
  -1 -13  -4    9.98   20.14
  -4 -13   1   88.03   65.12
  -1 -12  -4   50.60   40.83
  -4 -12   1    0.26   10.72
   4 -11  -1    4.10    5.28
  -1 -11  -4   -2.01   12.75
  -4 -10   1  123.06   61.75
   4 -10  -1   99.71   40.54
   1 -10   4    0.97    7.23
  -1  -9  -4  114.68   52.75
   4  -9  -1   59.64   27.62
  -4  -9   1  123.54   57.65
  -1  -8  -4   26.19   24.71
  -4  -8   1   50.56   36.49
   4  -7  -1   91.90   32.58
  -1  -7  -4   19.76   20.13
   4  -6  -1   11.90   11.59
   1  -6   4 1944.18  142.43
  -4  -6   1  299.62   79.95
  -1  -6  -4 2108.79  199.76
  -4  -5   1  249.56   71.70
  -1  -5  -4  212.49   54.75
  -1  -5  -4  183.41   59.46
   1  -5   4  263.87   51.24
  -1  -4  -4   39.87   20.76
   1  -4   4   41.17   20.09
  -4  -4   1   74.76   36.51
  -1  -4  -4   44.77   24.21
   1  -4   4   30.50   18.97
   4  -3  -1 2608.31  174.84
  -1  -3  -4    6.36    4.51
   1  -3   4  155.21   37.75
   4  -3  -1 2793.67  108.91
  -1  -3  -4    9.36   14.12
  -4  -3   1 1665.93  170.70
   1  -3   4  152.81   38.08
   4  -3  -1 3243.04  208.76
  -4  -3   1 1027.22   86.98
  -4  -2   1  103.29   33.52
   4  -2  -1  442.46   67.85
   1  -2   4 2241.57  133.32
  -4  -2   1  103.67   26.25
   4  -2  -1  519.68   53.16
   4  -2  -1  481.65   70.81
  -1  -2  -4 3346.42  231.58
   1  -2   4 1933.89  115.03
   4  -1  -1  288.44   50.66
   4  -1  -1  260.03   46.70
   1  -1   4  155.29   36.34
  -1  -1  -4  123.98   25.32
   4  -1  -1  265.75   39.26
  -1  -1  -4  153.68   45.91
   1  -1   4  154.12   29.33
  -4  -1   1  909.48   77.38
  -4  -1   1 1163.61  103.42
  -4  -1   1 1094.64   74.18
  -4   0   1  374.10   54.75
   1   0   4 3207.05  168.63
   1   0   4 2868.29  119.81
   4   0  -1  334.83   49.81
  -4   0   1  348.22   34.07
  -1   0  -4 2706.42  117.18
   4   0  -1  333.56   50.43
  -4   0   1  364.37   51.26
  -1   0  -4 3636.67  201.84
  -4   1   1  386.99   59.53
   4   1  -1 1060.32   62.41
   1   1   4  141.10   38.56
   4   1  -1 1320.59  123.83
  -4   1   1  436.37   49.06
   4   1  -1 1024.98   81.49
  -1   1  -4  181.54   35.06
  -1   1  -4  182.37   34.30
  -1   1  -4  184.80   42.15
  -4   2   1  517.40   48.31
  -1   2  -4 1847.27  113.96
   4   2  -1  130.48   28.96
   4   2  -1  131.63   28.41
   4   2  -1  155.57   49.03
   1   2   4 2846.25  189.72
  -1   2  -4 2228.19  128.19
  -1   2  -4 2265.96  153.70
  -4   2   1  613.77   82.16
   1   3   4    4.15   10.92
  -1   3  -4  113.42   30.20
  -4   4   1   73.69   33.63
   1   4   4   29.80   26.67
  -1   4  -4   53.93   22.92
   1   4   4   31.25   17.46
  -1   5  -4  281.77   58.10
   1   5   4  158.38   63.01
  -1   5  -4  264.26   76.13
   1   5   4  204.65   49.75
  -4   6   1   13.33   15.57
   1   6   4 2293.59  181.42
  -1   6  -4 2145.08  239.47
   1   6   4 2134.43  233.24
  -1   6  -4 2420.19  195.40
   4   6  -1  414.52   98.91
   1   7   4    6.60    8.89
  -4   7   1   94.14   48.18
  -1   8  -4  124.93   61.74
   4   8  -1   84.16   46.38
   1   8   4   17.43   15.95
  -4   9   1   91.94   55.66
   4   9  -1  159.29   65.89
   1   9   4  121.75   50.99
   4  10  -1   91.02   51.85
  -4  10   1  119.30   62.70
  -1  10  -4   -1.07    3.22
  -4  11   1    0.43   17.93
   1  11   4   12.31   19.66
   4  12  -1    8.67   23.92
   1  12   4   31.57   34.53
  -1  12  -4   97.55   68.11
   4  13  -1   38.62   34.42
   1  13   4   21.10   33.87
  -4  13   1  103.06   68.13
  -4  14   1  160.46   89.68
   1  14   4   24.70   28.67
   4  14  -1  115.39   76.10
  -1  14  -4  -11.35   32.38
   1  15   4    8.01   18.61
  -4  15   1    5.12   33.31
   4  15  -1    5.09    5.86
   4  16  -1   19.43   33.92
  -1  16  -4  119.22   88.23
   1  16   4    8.18   22.76
  -4  16   1   39.99   44.14
   1  17   4    4.27   22.51
  -1  17  -4  101.07   78.26
  -4  17   1   32.86   36.39
  -4 -17   2   32.07   41.90
  -2 -17  -4   43.53   30.94
  -4 -16   2   55.40   51.93
  -2 -16  -4    9.72   17.92
  -2 -15  -4   18.86   42.84
  -4 -15   2   55.94   50.25
  -2 -14  -4  135.78   74.04
   2 -14   4  198.58   72.19
  -4 -14   2   46.73   46.41
   4 -14  -2    4.47   15.06
   4 -13  -2   17.56   23.50
  -2 -13  -4   16.00   20.24
   2 -13   4   19.76   17.75
   2 -12   4   -8.89   17.26
  -2 -12  -4   30.37   25.83
  -4 -11   2  126.36   72.19
   4 -11  -2  120.49   49.01
   2 -11   4   63.79   35.25
  -2 -11  -4   78.61   46.61
  -2 -10  -4  293.49   90.13
  -4 -10   2  224.66   92.56
   4 -10  -2   -0.12    3.14
   2 -10   4  232.61   62.68
  -2  -9  -4  113.34   54.07
   2  -9   4  418.02   76.87
   4  -9  -2  357.98   77.72
  -4  -9   2  386.95  115.97
  -2  -8  -4  124.72   54.76
   2  -8   4   42.54   22.49
   4  -8  -2   80.88   34.65
  -4  -8   2   87.27   47.91
   4  -7  -2  352.23   70.82
   2  -7   4  191.35   44.93
  -4  -7   2  493.38  114.69
  -2  -6  -4    9.62    8.84
   4  -6  -2  154.70   41.21
  -4  -6   2  164.38   58.77
   2  -6   4   67.13   26.24
  -2  -6  -4    8.55   16.19
  -2  -5  -4  147.29   51.25
   2  -5   4  291.87   50.61
  -4  -5   2  221.16   60.15
  -2  -5  -4  171.61   47.29
   2  -5   4  269.86   60.99
  -2  -4  -4  121.51   45.38
   2  -4   4   68.36   23.36
  -4  -4   2  147.21   46.57
   2  -4   4   65.27   28.74
  -2  -4  -4  166.01   38.90
   4  -4  -2  112.84   25.46
   4  -3  -2  859.97   74.18
   2  -3   4  426.02   51.67
   2  -3   4  487.25   81.43
  -2  -3  -4 1593.55  147.88
  -2  -3  -4 1686.58  104.50
  -4  -3   2 1243.26  130.71
  -4  -3   2 1051.66   81.12
   2  -2   4    5.33    9.31
   4  -2  -2  296.30   53.22
  -4  -2   2  155.09   41.57
  -2  -2  -4    6.64    5.71
   4  -2  -2  361.91   49.28
  -4  -2   2  129.38   26.70
  -2  -2  -4    2.74    0.56
  -2  -2  -4    4.28    6.95
   4  -2  -2  377.65   66.82
   2  -1   4 2831.70  144.75
  -2  -1  -4 2157.77  173.25
  -2  -1  -4 1849.97  120.00
  -4  -1   2 1503.48  121.93
   4  -1  -2   75.39   26.40
   2  -1   4 2974.55  172.49
  -4  -1   2 1582.15  105.85
   4  -1  -2   62.90   21.93
   4   0  -2   16.75    9.06
  -4   0   2   12.41   10.82
  -4   0   2    6.69    8.75
  -2   0  -4   73.01   31.47
   2   0   4   61.86   22.34
   2   0   4   54.23   24.15
  -2   0  -4   46.43   17.80
   4   0  -2    6.06    5.96
  -2   1  -4 3188.10  190.02
   4   1  -2 1566.01  130.29
   2   1   4 1994.61  155.96
  -4   1   2   94.54   27.75
  -2   1  -4 2827.41  124.81
   2   1   4 1871.98  121.53
   4   1  -2 1324.74   84.44
  -2   1  -4 3236.80  167.38
  -2   2  -4    6.67   10.50
  -2   2  -4    4.67    7.17
  -2   2  -4    5.98    6.85
   2   2   4   -0.11    7.91
  -2   3  -4  365.23   53.15
  -2   3  -4  317.00   76.34
  -2   3  -4  289.95   56.08
  -2   4  -4   56.40   20.67
   2   4   4  166.07   37.99
   2   4   4  166.92   59.58
  -2   4  -4   39.39   31.30
  -4   4   2  151.26   49.47
  -2   5  -4  296.38   56.39
  -2   5  -4  270.12   77.71
   2   5   4  245.74   78.59
   2   5   4  236.65   49.68
   2   6   4   21.45   16.60
   2   6   4   10.21   18.96
  -2   6  -4   44.73   31.32
  -2   6  -4   36.94   24.94
   2   7   4  752.08  147.37
  -2   7  -4  144.25   61.84
  -4   7   2  339.80   89.54
   4   7  -2  402.18  108.19
  -2   7  -4  182.69   58.15
   2   7   4  725.07  104.53
  -4   8   2   90.24   48.09
   2   8   4  121.14   64.51
   4   8  -2   54.50   44.24
  -2   8  -4   38.61   34.70
   2   8   4  140.98   50.72
  -2   9  -4  361.61  109.86
   4   9  -2  313.20   99.32
  -4   9   2  421.84  108.40
   2   9   4  186.24   63.37
  -4  10   2   14.81   15.97
   4  10  -2  151.06   72.34
  -2  10  -4  211.13   92.31
  -4  11   2  223.82   89.22
  -2  11  -4   56.39   47.26
   2  11   4   73.64   47.84
   4  11  -2   65.16   51.96
   4  12  -2  170.93   84.51
  -4  12   2  125.09   69.24
   2  12   4   12.08   14.70
  -2  12  -4   -5.80   14.04
  -2  13  -4   25.40   28.34
   2  13   4   44.30   39.26
  -4  13   2   33.72   28.37
  -2  14  -4  208.29  102.24
   4  14  -2   60.16   53.78
  -4  14   2    8.79   23.74
   2  14   4  188.89   85.94
   4  15  -2   59.30   49.69
   2  15   4   22.61   35.36
  -4  15   2   25.72   24.71
  -2  15  -4   88.96   69.86
   2  16   4  -12.48   30.36
  -4  16   2   -8.19   31.15
  -2  16  -4   27.92   41.75
   4  16  -2   66.94   67.38
  -2  17  -4   66.97   67.78
  -4  17   2    7.16   23.82
   4  17  -2   37.45   40.36
   2  17   4   68.05   62.79
  -4 -17   3   21.31   24.86
  -3 -17  -4   64.00   61.13
  -4 -16   3   86.72   59.65
  -3 -16  -4   91.93   70.65
  -4 -15   3  107.04   65.44
   4 -15  -3  120.44   58.89
  -3 -15  -4  137.98   74.81
  -4 -14   3   26.68   33.85
  -3 -14  -4   55.27   47.92
   4 -14  -3   33.67   27.71
  -4 -13   3   41.77   35.88
  -3 -13  -4   12.10   21.20
   3 -13   4   -0.11   11.98
   4 -12  -3  287.69   82.66
   3 -12   4   28.58   21.79
  -4 -12   3  151.32   69.05
  -3 -12  -4  201.68   85.75
   4 -11  -3  259.50   74.29
  -4 -11   3  522.85  121.36
  -3 -11  -4  369.03  110.40
   4 -10  -3  225.63   69.28
  -3 -10  -4   84.76   51.64
   3 -10   4  148.09   44.94
  -4 -10   3  138.03   59.60
   3  -9   4   57.87   26.91
  -4  -9   3   65.29   40.93
  -3  -9  -4    6.23    6.26
  -3  -8  -4  305.85   95.88
  -4  -8   3  431.20   98.65
   3  -8   4  214.77   47.25
   3  -7   4    4.57   12.34
   4  -7  -3  793.78  110.36
  -4  -7   3  362.42   86.77
   3  -7   4    4.68    7.99
  -3  -7  -4  683.98  123.67
  -3  -6  -4  634.25  119.48
   3  -6   4 1065.78   93.19
   3  -6   4 1005.41  133.23
  -3  -6  -4  620.66   89.74
   3  -5   4  132.11   32.51
   3  -5   4  106.67   40.67
  -3  -5  -4   10.98   13.79
  -3  -5  -4   14.18   12.55
  -4  -5   3  139.66   52.27
  -3  -4  -4  746.80   75.20
   3  -4   4   31.84   24.88
  -3  -4  -4  690.88  112.52
  -4  -4   3 1023.59  127.40
   4  -4  -3  767.26   75.87
   3  -4   4   30.52   13.24
  -4  -3   3  852.12  107.29
  -3  -3  -4  232.51   35.58
  -4  -3   3  727.79   61.68
   3  -3   4  278.12   60.53
   4  -3  -3  261.93   45.97
  -3  -3  -4  260.21   66.59
  -3  -2  -4  339.11   36.08
  -3  -2  -4  242.67   45.36
  -3  -2  -4  308.37   63.40
  -4  -2   3  246.48   32.90
  -4  -2   3  308.93   59.62
   3  -1   4   14.21   10.65
   4  -1  -3  914.25   92.37
  -3  -1  -4   78.27   28.17
  -3  -1  -4  125.23   44.36
  -4  -1   3   28.16   11.72
   3  -1   4    9.67    8.20
   4  -1  -3  810.18   79.06
  -4  -1   3   29.02   17.98
  -3   0  -4  198.92   43.84
  -4   0   3  831.14   70.88
   3   0   4  205.49   43.78
   4   0  -3  807.89   85.08
  -3   0  -4  246.69   61.59
   3   0   4  178.32   47.70
   4   0  -3  933.33   75.14
  -4   0   3  930.80   95.74
   4   1  -3   25.28   18.95
  -3   1  -4    6.15   13.43
   3   1   4  127.23   33.15
  -3   1  -4    5.15    6.26
  -3   1  -4    2.40    7.71
   3   1   4  112.42   38.53
   4   1  -3   25.77    9.87
   3   2   4  363.02   71.26
  -4   2   3  771.40   74.90
  -3   2  -4 1876.87  159.13
  -3   2  -4 1781.09   99.96
  -3   2  -4 1640.47  143.39
  -3   3  -4  196.02   49.73
  -3   3  -4  220.62   36.75
   3   3   4  215.05   61.95
  -3   3  -4  169.93   52.16
   3   4   4  646.70   67.12
   3   4   4  666.03  120.65
  -3   4  -4   50.30   40.16
  -3   4  -4   34.32   14.97
  -4   4   3 1069.73  137.97
  -3   5  -4  125.41   49.42
   3   5   4   21.78   22.63
  -3   5  -4  128.07   32.92
   3   5   4   20.15   14.06
   3   6   4  689.12  143.31
  -3   6  -4  978.27  149.94
   3   6   4  616.67   84.73
  -3   6  -4  935.49  104.63
  -4   6   3  707.53  122.02
  -3   7  -4    2.60    4.01
  -4   7   3  857.79  142.54
   3   7   4  797.43  157.96
   3   7   4  790.07  106.42
  -3   7  -4    6.49   22.92
  -3   8  -4  241.48   86.37
  -3   8  -4  166.89   49.34
   3   8   4  279.14   99.09
   3   8   4  320.15   78.88
  -4   8   3   46.77   32.90
   3   9   4   33.62   31.76
   4   9  -3   58.05   41.41
  -3   9  -4   41.17   39.98
   3   9   4   34.53   29.16
  -3  10  -4  103.67   61.40
   4  10  -3  129.78   70.31
   3  10   4  115.05   71.15
   3  10   4  125.31   57.33
  -4  10   3  245.66   86.30
  -4  11   3  404.04  123.55
   4  11  -3  569.56  148.38
   3  11   4  477.08  150.39
   3  11   4  501.11  121.44
  -3  11  -4   -1.02   22.40
  -3  12  -4   32.60   32.22
   4  12  -3  200.34   88.76
   3  12   4  347.63  138.20
  -4  12   3  424.01  126.35
   3  12   4  347.41  108.08
   3  13   4    7.48    9.48
  -3  13  -4    4.65   13.54
   3  13   4   32.96   45.75
   4  13  -3   33.43   42.93
  -4  14   3   55.94   39.04
   4  14  -3   -0.46   19.97
   3  14   4   66.08   75.10
   3  14   4   84.15   56.39
  -3  14  -4   20.79   33.24
   3  15   4  220.32  134.41
  -4  15   3  161.32   89.58
   4  15  -3  108.97   84.30
   3  15   4  162.79   83.05
  -3  15  -4    7.60   26.78
  -4  16   3   14.88    8.58
   3  16   4   44.11   43.61
  -3  16  -4   -1.10   13.63
   3  16   4   87.77   93.74
   4  16  -3  118.69   86.40
   3  17   4   32.07   30.88
  -3  17  -4   18.91   32.98
   3  17   4    5.56   22.13
  -4  17   3   12.53   27.80
   4  17  -3   37.54   52.57
  -4 -16   4   14.41   31.69
  -4 -16  -4   15.68   13.03
  -4 -15   4   11.53   32.82
   4 -15  -4    4.40   20.99
  -4 -15  -4   17.54   32.28
  -4 -14  -4  120.87   74.76
  -4 -14   4  167.33   77.06
   4 -14  -4  249.32   84.87
   4 -13  -4   10.40   18.33
  -4 -13   4  278.77   99.74
  -4 -13  -4  211.06   90.22
   4 -12   4   13.23    9.99
  -4 -12   4   14.37   21.27
   4 -12  -4   -3.90   18.08
  -4 -12  -4   23.55   21.15
  -4 -11   4   12.96   23.93
   4 -11  -4   64.32   42.26
  -4 -11  -4   15.22   25.56
   4 -11   4  102.15   37.92
  -4 -10  -4  314.29  101.15
   4 -10   4  592.38  133.22
  -4 -10   4  450.45  109.96
   4 -10  -4  572.02  121.51
   4 -10   4  662.54   85.83
   4  -9   4   32.83   18.66
  -4  -9   4  498.05  117.47
  -4  -9  -4  375.25  105.30
   4  -9  -4   30.16   21.52
   4  -9   4   22.95   22.70
  -4  -8   4   40.55   26.30
  -4  -8  -4   36.61   30.94
   4  -8  -4    2.63    8.21
   4  -8   4   16.95   12.35
   4  -8   4    3.48   12.37
   4  -7   4  325.17   83.11
   4  -7   4  363.30   50.36
  -4  -7  -4    5.71    7.17
  -4  -7   4    0.97   12.68
  -4  -7  -4   17.93   21.25
  -4  -6  -4  156.91   55.65
  -4  -6  -4  187.40   48.96
   4  -6   4  656.27  114.08
   4  -6   4  751.52   65.59
  -4  -6   4  182.89   56.39
   4  -5   4   94.59   41.76
   4  -5   4   81.32   18.68
  -4  -5  -4  246.75   70.31
  -4  -5   4  293.46   72.12
  -4  -5  -4  262.88   48.36
  -4  -4   4  105.43   39.07
  -4  -4  -4   88.97   41.66
   4  -4   4   89.85   40.63
  -4  -4  -4   70.27   19.79
  -4  -3   4   33.15   21.21
  -4  -3  -4   23.30    8.51
  -4  -3   4   25.13   10.15
  -4  -3  -4   45.21   26.56
  -4  -2   4   58.62   15.86
   4  -2   4  203.86   57.31
   4  -2  -4  177.68   45.18
  -4  -2   4   75.04   31.77
  -4  -2  -4   47.82   24.86
   4  -1   4   30.77   19.64
  -4  -1   4   29.34   11.37
  -4  -1  -4   28.00   16.85
  -4  -1   4   51.42   23.59
   4  -1  -4   34.11   19.70
   4  -1  -4   30.02   13.99
   4  -1   4   35.54   21.94
  -4   0   4  107.48   37.05
   4   0   4   82.97   30.26
  -4   0  -4   72.80   26.35
  -4   0   4  104.11   16.98
  -4   0  -4   71.51   19.21
   4   0   4   77.11   33.61
   4   0  -4  105.05   22.04
  -4   1   4   34.84   13.70
  -4   1   4   34.09   17.09
  -4   1  -4   32.12   16.52
   4   1   4   29.66   17.37
   4   1   4   26.74   22.50
   4   1  -4   22.95    8.31
   4   2  -4   62.97   15.41
  -4   2  -4  125.82   38.09
   4   2   4   52.58   29.21
   4   2   4   48.79   25.29
  -4   2  -4  121.59   23.24
  -4   3  -4  671.54   99.96
  -4   3  -4  737.74   64.10
  -4   4  -4   62.27   34.58
  -4   4  -4   76.92   19.35
   4   4   4   81.31   20.67
   4   4   4   68.78   42.49
  -4   5   4   96.76   47.17
  -4   5  -4  105.05   29.34
   4   5   4  285.44   86.12
   4   5   4  271.91   46.26
  -4   5  -4   86.32   48.28
  -4   6  -4  668.92   79.48
   4   6   4  161.04   40.94
   4   6   4  167.20   75.04
  -4   6  -4  661.96  130.51
  -4   6   4  784.17  129.97
  -4   7  -4  282.61   50.75
  -4   7  -4  373.06  100.31
   4   7   4    9.88   14.83
   4   7   4    4.10   16.89
  -4   7   4  376.39   96.01
  -4   8   4   15.80   19.57
   4   8   4   33.91   32.15
   4   8   4   30.67   24.12
  -4   8  -4    6.21    9.19
  -4   8  -4   12.94   18.00
   4   9   4  453.34  133.52
  -4   9  -4   28.75   33.20
   4   9  -4  538.37  143.07
  -4   9   4   20.82   21.85
  -4   9  -4   15.37   11.83
   4   9   4  495.62  102.67
   4  10   4  413.20  130.75
   4  10  -4  508.10  141.97
  -4  10   4  709.23  153.77
  -4  10  -4  703.59  162.08
   4  10   4  439.14  105.83
   4  11   4   10.85   19.70
   4  11  -4    8.91   19.63
  -4  11  -4  105.03   67.40
   4  11   4    5.61   13.35
  -4  11   4   73.89   55.45
  -4  12  -4   22.71   31.83
   4  12  -4   36.68   41.80
   4  12   4   11.36    6.57
  -4  12   4   10.86   31.30
   4  12   4   16.25   10.54
   4  13  -4  274.69  117.76
   4  13   4  315.02  130.30
  -4  13  -4   16.51   36.83
   4  13   4  269.16   98.37
  -4  13   4   33.21   43.17
   4  14  -4  147.88   86.65
   4  14   4  184.47   85.05
  -4  14  -4  485.00  176.68
   4  14   4  190.81  111.96
  -4  14   4  404.66  135.12
  -4  15   4   -7.04   37.06
   4  15   4   23.59   28.21
   4  15   4   20.98   10.78
  -4  15  -4   -2.41   11.89
   4  15  -4   14.93   10.52
  -4  16   4    1.19   17.06
   4  16   4    4.78   29.27
  -4  16  -4   -4.79   43.65
   4  16   4   22.09   34.14
   4  16  -4   10.39   15.21
  -5 -16  -4   -1.33   25.14
   5 -16   4   11.99    8.87
   5 -15   4   56.93   51.55
  -4 -15   5   84.46   56.90
  -5 -15  -4    1.34   25.65
   4 -15  -5  120.89   67.18
   4 -14  -5    6.13   17.26
   5 -14   4   27.92   36.32
  -4 -14   5   32.20   35.36
  -5 -14  -4  -14.59   21.27
  -5 -13  -4   -1.01   27.05
  -4 -13   5   44.70   40.69
   5 -12   4   32.95   28.82
   4 -12  -5   21.09   32.82
  -5 -12  -4   15.12   26.81
  -5 -11  -4   31.77   30.96
   5 -11   4  103.82   59.92
   4 -10  -5  126.08   55.40
  -5 -10  -4  253.89   90.39
   5 -10   4   99.81   31.39
   5 -10   4   68.89   44.60
  -4 -10   5  242.82   81.44
   4  -9  -5  388.41   99.06
   5  -9   4  367.22   98.72
  -5  -9  -4  200.57   76.98
  -4  -9   5   99.79   48.06
   5  -9   4  428.66   58.66
  -4  -8   5  571.08  112.85
   5  -8   4  512.16   61.46
   5  -8   4  469.64  108.24
   5  -7   4  153.49   27.29
   5  -7   4  163.60   61.04
   5  -6   4   76.89   43.98
  -5  -6  -4  225.02   71.17
  -4  -5   5   70.27   33.72
  -5  -5  -4  341.63   80.46
  -4  -4   5  125.57   45.69
  -5  -4  -4   64.99   33.58
  -4  -3   5  276.82   67.79
  -4  -3   5  192.40   26.37
   5  -3   4   16.18   23.08
  -5  -3  -4  118.12   44.91
   5  -3   4   10.59   14.97
   5  -2   4  264.85   68.63
  -4  -2   5  455.96   81.66
  -5  -2  -4  255.34   63.49
  -4  -1   5   59.33   30.81
   5  -1   4  182.73   49.90
   4  -1  -5  277.33   40.37
   5  -1   4  192.74   52.95
  -5  -1  -4  225.13   57.21
  -4   0   5   67.43   29.87
   4   0  -5   62.93   15.53
   5   0   4   20.85   24.29
  -4   0   5   62.84   16.26
   5   0   4   14.74   13.04
  -5   0  -4   24.37   17.24
  -5   0  -4   26.05   12.28
  -5   1  -4  157.31   37.69
  -5   1  -4  163.27   37.88
  -4   1   5  277.48   42.25
  -4   1   5  306.80   60.41
   4   1  -5   41.46   14.43
   5   1   4  207.79   55.25
   5   1   4  224.61   49.38
  -5   2  -4  156.17   41.78
  -5   2  -4  144.02   32.08
   4   2  -5  419.96   46.97
   5   2   4  321.99   74.14
   5   2   4  264.72   62.05
  -5   3  -4   17.07    8.36
  -5   3  -4   11.97   17.54
  -5   4  -4  140.95   24.20
   5   4   4   72.90   39.80
   5   5   4  495.01  109.79
   5   5   4  493.09   55.94
  -5   5  -4  268.76   34.80
  -5   5  -4  427.08   94.49
   5   6   4  289.08   50.13
  -5   6  -4   45.62   35.08
   5   6   4  288.87   93.34
  -5   6  -4   33.15   12.87
   5   7   4    5.08    8.11
   5   7   4    4.53    7.84
  -4   8   5   88.86   46.72
   5   8   4  176.75   82.94
  -5   8  -4  334.75   53.93
   5   8   4  168.31   53.72
   5   9   4  312.48  116.80
  -5   9  -4  416.87  128.76
  -5   9  -4  368.82   63.65
  -4   9   5  441.63  115.66
   5   9   4  301.30   82.00
   5  10   4  361.05  127.64
   4  10  -5  332.16  121.80
   5  10   4  383.47   99.49
  -4  10   5  170.66   75.54
  -5  10  -4  107.01   67.99
   5  11   4   31.45   30.76
   5  11   4   40.36   47.12
  -5  12  -4   41.24   40.19
  -4  12   5   26.53   27.21
   5  12   4   15.65   30.10
   5  12   4   30.66   33.13
   5  13   4    7.79   12.69
   4  13  -5   44.86   30.97
   5  13   4    9.04   17.98
   5  14   4    0.55    9.49
  -4  14   5   19.17   35.32
  -5  14  -4    1.75   20.97
   4  14  -5   57.61   63.55
   5  14   4   -4.74   24.40
   4  15  -5  111.82   82.62
  -5  15  -4   98.53   78.30
   5  15   4   13.79   44.12
  -4  15   5  164.28   94.21
   5  16   4   -1.13   17.65
  -4  16   5   13.43   35.67
  -5  16  -4   20.07   43.90
  -5 -16  -3  101.62   71.98
   3 -16  -5   -9.18   22.03
  -3 -16   5  113.16   64.19
  -3 -15   5  130.75   71.47
  -5 -15  -3   65.76   65.43
   3 -15  -5    5.17   15.05
  -5 -14  -3   17.90   28.39
  -3 -14   5    9.61   18.04
  -3 -13   5   62.76   41.06
  -5 -13  -3   61.95   56.70
   3 -13  -5    0.73    6.55
  -3 -12   5  155.11   64.60
  -5 -12  -3  192.88   92.68
   3 -12  -5    1.35   12.76
   3 -11  -5  215.62   79.62
  -3 -11   5  153.94   62.34
   5 -11   3    7.04   10.16
  -5 -11  -3  305.28  110.27
   5 -10   3    7.24   18.92
  -3 -10   5   41.07   29.00
   5 -10   3    2.28    3.93
   5  -9   3   62.58   38.55
   3  -9  -5  223.29   77.08
  -3  -9   5  162.53   62.18
   5  -9   3   80.34   24.74
  -5  -9  -3   19.27   24.38
   3  -8  -5   38.45   28.63
  -3  -8   5  228.71   67.97
  -5  -8  -3  313.00   91.23
   5  -8   3  104.46   26.44
   5  -8   3  113.47   51.97
   5  -7   3   11.21    8.45
   5  -7   3    9.71    7.64
   5  -6   3  154.17   56.20
   5  -6   3   85.62   13.34
  -3  -6   5  126.89   47.75
  -5  -5  -3  297.90   79.06
   5  -5   3  421.47   92.51
  -3  -5   5  282.95   66.92
  -3  -4   5  221.56   61.11
   5  -4   3  124.65   49.81
   5  -3   3   62.05   32.12
   5  -3   3   78.53   36.63
  -3  -2   5   13.72   15.15
   5  -2   3   69.60   35.39
  -5  -2  -3  112.14   37.82
   5  -2   3   49.28   25.25
   5  -1   3  499.44   79.01
  -3  -1   5  378.00   71.10
   5  -1   3  445.24   64.17
   5  -1   3  542.90   83.17
  -5   0  -3  368.74   39.15
   3   0  -5   72.43   14.31
   5   0   3  323.08   45.41
   3   0  -5   84.67   26.25
   5   0   3  425.96   75.26
  -5   0  -3  311.42   52.06
  -3   0   5   94.08   22.76
   5   0   3  323.37   64.29
  -3   0   5   86.71   32.74
   5   1   3  132.39   38.22
   3   1  -5  252.29   41.33
  -3   1   5 1304.22  115.86
  -3   1   5 1272.13   95.93
   5   1   3  114.52   37.83
  -5   1  -3  381.55   49.97
  -5   1  -3  485.99   61.28
   5   1   3  127.70   38.63
  -3   2   5  103.80   36.10
   5   2   3  169.43   50.36
   5   2   3  180.89   48.01
  -5   2  -3   41.03   22.12
   3   2  -5   18.98   11.17
  -5   2  -3   39.94   13.49
   5   2   3  156.29   48.21
   3   3  -5 1202.16  103.55
  -3   3   5 1001.01  124.86
   5   4   3  764.87   60.55
   5   4   3  685.44  114.78
  -3   4   5  193.80   60.08
  -5   4  -3  184.58   61.31
   5   5   3  482.41   65.19
   5   5   3  409.46   99.16
  -5   5  -3  332.60   86.97
   5   6   3  283.63   90.38
  -5   6  -3  174.54   70.53
  -5   6  -3  113.52   19.98
   5   6   3  356.18   67.88
  -3   6   5  479.10  101.08
   5   7   3 1095.49  134.39
  -5   7  -3   19.18   25.94
   5   7   3  888.62  168.51
  -3   7   5  330.60   90.89
  -5   7  -3   15.78    9.19
  -5   8  -3  107.75   28.68
   5   8   3  386.48  115.20
  -5   8  -3  118.53   67.00
   5   8   3  506.62  103.44
  -3   8   5   51.28   35.26
   5   9   3   10.32   15.97
  -5   9  -3   70.68   51.82
   5   9   3   10.30   14.55
  -3   9   5  309.35   94.65
  -5   9  -3   48.04   21.13
   3   9  -5  214.53   89.63
  -5  10  -3   17.26   26.70
   5  10   3  127.73   59.51
   5  10   3  115.11   65.74
   3  10  -5   23.53   38.56
   5  11   3  391.77  111.45
  -5  11  -3   15.01   19.27
   5  11   3  413.89  134.12
  -3  11   5  221.87   88.99
   3  11  -5  141.90   81.70
   3  12  -5  131.92   72.55
  -5  12  -3  222.59  102.88
   5  12   3  219.08  104.78
  -3  12   5   -5.23    8.89
   5  12   3  195.66   80.42
   5  13   3   62.72   43.18
   3  13  -5   72.91   45.16
   5  13   3   78.53   66.85
  -5  13  -3    0.13   29.21
  -3  13   5    5.31   20.88
   5  14   3   27.12   30.00
   3  14  -5    6.87   14.97
   5  14   3  -15.90   36.88
  -5  14  -3  -13.13   35.40
   5  15   3   67.08   57.27
   5  15   3   98.62   84.94
  -5  15  -3   85.58   71.71
   3  15  -5  154.88   93.89
  -3  15   5    7.17   28.37
   5  16   3  111.16   75.62
   5  16   3  116.18   94.50
  -5  16  -3   74.75   61.13
   3  16  -5   85.31   79.47
  -3  16   5   -4.57   27.51
  -2 -17   5   10.84   20.57
  -5 -17  -2    5.02   11.23
   2 -17  -5    0.16   21.88
  -5 -16  -2   14.82    1.35
   2 -16  -5   12.02   33.32
  -2 -15   5  112.09   60.32
  -5 -15  -2   12.67   15.29
   2 -15  -5   69.23   50.45
   2 -14  -5    7.87   21.11
  -2 -14   5   23.85   20.22
  -2 -13   5   30.79   33.04
   2 -13  -5   99.93   52.87
  -5 -13  -2   34.91   36.15
  -5 -12  -2   19.15   24.55
   2 -12  -5   48.33   39.84
   5 -11   2  138.40   41.31
  -5 -11  -2   92.04   60.46
   2 -11  -5  145.95   63.74
  -2 -11   5  118.68   53.37
  -2 -10   5   43.42   31.96
  -5 -10  -2  255.36  102.09
   2 -10  -5   87.27   51.38
   5 -10   2  257.72   51.40
   2  -9  -5  139.14   58.87
   5  -9   2   23.63   13.62
  -2  -9   5  155.69   59.54
  -5  -8  -2  149.41   70.61
   5  -8   2  351.18   91.88
  -2  -8   5  174.01   56.83
   5  -8   2  330.60   48.03
   2  -8  -5  151.88   61.09
  -2  -7   5  258.63   69.68
   2  -7  -5   91.07   42.46
  -5  -7  -2  274.84   86.62
   5  -7   2   85.89   42.64
   5  -7   2   42.00   13.57
   5  -6   2  490.86   98.11
  -5  -6  -2  242.04   73.65
  -2  -6   5  308.64   67.89
  -5  -5  -2  810.83  125.68
   5  -5   2  828.02  124.03
  -5  -4  -2  912.61  124.32
  -2  -4   5  759.97  107.60
   5  -3   2   95.80   45.10
  -5  -3  -2  316.09   69.16
  -5  -3  -2  405.57   86.37
   5  -3   2   76.08   36.52
  -2  -3   5  103.50   36.07
  -5  -2  -2   -0.19   13.35
  -5  -2  -2    0.44    5.79
   5  -2   2  111.33   36.49
  -2  -2   5   70.58   32.91
   5  -2   2  123.63   45.39
   5  -1   2  723.43   78.14
  -5  -1  -2   20.68   14.50
  -2  -1   5  103.65   35.38
   5  -1   2  859.28  110.43
   2  -1  -5   70.52   28.47
  -5  -1  -2   11.06   11.60
   5  -1   2  691.23   66.21
  -2  -1   5  116.76   29.19
   5  -1   2  868.70   97.29
  -2   0   5 1490.80  102.98
  -5   0  -2  563.99   83.69
  -5   0  -2  406.29   58.08
   2   0  -5 1865.83  128.90
   5   0   2  382.65   64.01
  -2   0   5 1506.22  125.60
   5   0   2  415.82   68.79
   5   0   2  478.98   56.72
   5   0   2  368.64   55.88
  -5   0  -2  584.27   53.97
   5   1   2   20.38   13.85
   2   1  -5   90.72   27.35
  -5   1  -2  858.10   78.68
   5   1   2   16.20    8.12
  -5   1  -2  928.62  107.98
  -2   1   5   92.42   28.42
  -5   1  -2  694.18   67.08
   5   1   2   16.58    7.44
   5   1   2   10.05   11.06
   5   2   2    4.62   13.85
  -2   2   5   41.95   24.97
   5   2   2    0.05    6.00
   5   2   2    1.33    6.12
  -5   2  -2  162.00   45.10
  -5   2  -2   85.70   18.14
  -5   2  -2  149.28   39.84
   2   2  -5   77.29   27.45
  -5   3  -2   55.57   28.12
   5   3   2  278.98   42.69
   5   3   2  329.93   68.73
  -2   3   5   -1.35   13.00
   2   3  -5  101.75   31.93
   5   4   2  997.11   85.69
   5   4   2  968.02  135.74
  -2   4   5  396.86   87.30
  -5   4  -2  233.72   63.11
   5   5   2  905.53  142.63
  -5   5  -2  983.44  141.25
   5   5   2  875.09   93.57
   5   6   2  264.53   84.02
   5   6   2  268.17   59.61
  -2   6   5   94.61   42.71
   5   7   2  256.85   82.81
   5   7   2  295.77   68.47
  -2   7   5   61.86   38.28
  -5   7  -2  134.61   63.12
   2   8  -5  193.81   83.17
   5   8   2  125.49   47.76
   5   8   2  124.56   61.06
  -2   8   5  124.55   53.48
  -5   9  -2   30.84   32.20
   5   9   2  579.03  140.19
  -2   9   5  176.76   69.21
   2   9  -5  186.56   83.45
   5   9   2  584.97  120.24
  -2  10   5   87.80   53.77
   5  10   2  283.22   90.52
  -5  10  -2  409.15  122.29
   2  10  -5   36.37   40.73
   5  10   2  264.57   99.08
  -2  11   5  140.82   67.02
  -5  11  -2  162.26   85.99
   2  11  -5  162.31   83.29
   5  11   2   90.93   55.80
   5  11   2   87.28   51.45
  -5  12  -2   41.92   45.15
  -2  12   5   64.49   51.40
   2  12  -5  195.81   88.64
   5  12   2   29.01   45.31
   2  13  -5   36.67   34.48
   5  13   2   58.83   49.50
  -5  13  -2   33.21   35.49
  -2  14   5   48.02   46.00
   5  14   2  145.42   86.80
  -5  14  -2  202.40  108.77
   2  14  -5   54.67   58.11
   2  15  -5  144.92   91.95
  -5  15  -2   11.77   33.89
  -2  15   5   98.13   69.28
   5  15   2   33.57   44.46
  -5  16  -2   19.04   38.05
   5  16   2   26.28   43.29
  -2  16   5   11.77   31.82
   2  16  -5  101.96   89.53
   5  16   2   55.30   49.13
  -2  17   5   22.12   16.81
  -5  17  -2   21.91   20.44
   5  17   2   31.88   35.33
   2  17  -5   46.84   54.38
   5  17   2   -1.11   20.83
   1 -17  -5   -5.65   22.86
  -5 -17  -1   30.59   25.48
  -1 -16   5   23.75   32.50
   1 -16  -5   95.60   64.39
  -5 -16  -1   63.79   55.74
  -5 -15  -1   35.51   44.68
  -1 -15   5   69.63   46.72
   1 -15  -5   -3.27   13.48
   1 -14  -5    5.04   14.49
  -1 -14   5  267.73   90.01
  -5 -14  -1  162.79   89.00
  -1 -13   5   12.28   18.47
   1 -13  -5   10.21   21.09
   1 -12  -5  108.67   57.71
   5 -12   1  117.50   46.74
  -5 -12  -1  100.21   61.70
  -1 -12   5   54.07   38.03
  -1 -11   5   88.11   43.84
   5 -11   1  299.74   72.55
  -5 -11  -1  400.16  132.89
   1 -11  -5    8.23    9.76
   5 -10   1   89.28   36.67
   1 -10  -5   12.52   23.75
  -5  -9  -1  104.32   60.87
   1  -9  -5   27.53   29.59
  -1  -9   5   85.90   39.97
   5  -9   1   77.78   31.44
  -5  -8  -1  130.14   70.15
   5  -8   1   50.09   24.54
  -1  -8   5  152.73   53.95
  -1  -7   5  402.43   81.51
   5  -7   1  410.39   55.57
  -5  -7  -1  212.89   81.10
   5  -6   1  360.54   41.96
  -1  -6   5  460.17   80.42
   5  -6   1  565.91  105.07
  -1  -5   5  146.51   46.24
   5  -5   1  242.26   65.00
  -5  -5  -1  240.11   76.40
  -1  -4   5  344.16   67.42
   5  -4   1  218.62   59.67
   5  -3   1 1306.17  143.59
   1  -3  -5  272.29   61.34
  -1  -3   5 1588.03  143.41
  -1  -3   5 1462.74   91.18
  -5  -3  -1   72.73   37.94
   5  -3   1 1501.94  169.12
  -5  -3  -1   71.76   31.17
  -1  -2   5   99.58   32.71
  -1  -2   5  118.36   21.97
   5  -2   1  944.92   57.96
   5  -2   1 1828.17  163.52
  -5  -2  -1  381.95   77.69
  -5  -2  -1  372.71   72.24
   1  -2  -5   82.00   33.76
   5  -2   1 1915.32  155.56
   5  -1   1   93.20   29.72
  -1  -1   5 3279.28  184.15
   5  -1   1  109.24   40.29
  -5  -1  -1  167.60   40.81
  -5  -1  -1  203.50   46.78
   5  -1   1   71.44   21.65
  -5  -1  -1  213.11   54.14
   1  -1  -5 3118.99  205.98
  -1  -1   5 3379.35  164.48
  -1   0   5  438.40   59.45
  -5   0  -1  215.76   45.30
   1   0  -5  423.73   63.53
   5   0   1  322.92   57.95
   5   0   1  265.04   48.08
   5   0   1  355.77   46.28
   1   0  -5  467.94   68.49
  -5   0  -1  265.53   58.09
  -5   0  -1  296.49   54.33
   1   0  -5  406.71   35.53
   5   0   1  344.71   52.70
   1   1  -5 3491.19  202.38
  -5   1  -1   97.14   37.64
   5   1   1  209.05   32.62
  -5   1  -1  112.97   33.69
   5   1   1  173.39   38.73
   1   1  -5 3498.30  112.59
   5   1   1  193.94   45.53
  -5   1  -1  115.84   29.33
   5   1   1  138.20   42.80
  -5   1  -1   97.34   27.51
   1   1  -5 3010.73  166.27
  -1   1   5 3170.67  180.43
   5   2   1  368.11   68.54
  -5   2  -1 1018.13   58.51
   5   2   1  376.50   60.85
   1   2  -5   90.59   29.88
  -5   2  -1 1661.65  130.38
   5   2   1  335.81   57.64
  -5   2  -1 1963.10  151.39
  -1   2   5   83.68   32.34
  -5   3  -1 1197.06  121.93
  -1   3   5  307.42   74.66
   1   3  -5 1708.96  142.80
   5   3   1   72.81   30.76
  -5   4  -1  266.08   68.21
  -1   4   5   33.34   29.61
   5   5   1  280.81   76.02
  -5   5  -1  219.77   69.48
  -1   5   5  548.46  112.73
   5   5   1  270.68   62.27
  -1   5   5  544.66   99.97
   5   6   1  109.43   46.62
  -1   6   5  127.78   62.48
   5   6   1  126.60   42.21
  -1   6   5  176.01   57.95
   5   7   1  241.48   67.46
  -1   7   5   71.15   37.48
   5   7   1  212.09   74.85
   5   8   1   82.52   40.88
  -5   8  -1   90.51   52.77
   1   8  -5  132.66   67.23
  -1   9   5   17.43   26.62
  -5   9  -1   98.92   58.14
   1   9  -5   67.52   47.48
   5   9   1   87.51   46.90
  -1  10   5   15.08   21.00
  -5  10  -1  176.28   74.05
   1  10  -5  396.62  124.11
   5  10   1  246.45   85.28
   1  11  -5   64.10   48.43
  -1  11   5   13.78   23.75
  -5  11  -1  488.22  140.84
   5  11   1  389.17  112.21
  -5  12  -1  198.18   91.45
  -1  12   5  152.96   73.54
   1  12  -5   49.84   44.74
   5  12   1  114.31   71.86
   1  13  -5    7.13   20.98
  -1  13   5   15.27   26.49
   5  14   1  188.30   95.68
  -1  14   5    8.65   21.11
   1  14  -5  290.43  127.40
  -5  14  -1   -0.06   15.68
  -1  15   5   10.08    7.07
   1  15  -5   48.12   52.59
   5  15   1   41.48   51.47
   5  16   1   28.44   39.80
  -5  16  -1   62.83   65.93
   1  16  -5  -11.29   44.95
  -1  16   5  174.38   94.22
  -1  17   5   -4.76   30.03
  -5  17  -1    5.68   27.58
   5  17   1   31.30   49.37
   1  17  -5   14.61   20.13
  -5 -17   0   17.59   13.01
   0 -17  -5  -14.29   32.66
   0 -16   5   18.82   25.49
   0 -16  -5   -2.35   22.27
  -5 -16   0   64.72   58.72
   0 -15  -5   45.13   45.00
   0 -15   5   71.00   45.91
  -5 -14   0   30.44   38.81
   0 -14   5   12.21   13.50
   0 -14  -5    2.08   21.18
   0 -13   5   50.42   38.59
   0 -13  -5   50.84   46.12
   0 -12   5   17.35   17.85
   5 -12   0   15.71   15.31
   0 -12  -5   21.98   19.65
  -5 -12   0   48.10   35.99
   0 -11  -5  146.58   66.51
   5 -11   0    4.07    7.17
   0 -11   5  168.99   59.42
   0 -10  -5   62.41   44.21
   5 -10   0    0.12    4.15
  -5 -10   0   -0.55   10.65
   0 -10   5   82.86   39.89
   0  -9  -5  107.75   54.57
  -5  -9   0  246.09   92.40
   5  -9   0  152.82   44.37
   0  -9   5  113.52   46.52
   0  -8   5  167.13   54.34
  -5  -8   0  220.81   82.24
   0  -8  -5  124.13   55.56
   5  -8   0   66.62   25.57
   5  -7   0  463.02   62.70
   0  -7  -5  433.67   99.32
   0  -7   5  439.68   78.65
   0  -6   5  947.49  116.06
   5  -6   0   65.08   19.89
   0  -6  -5  779.55  124.43
  -5  -6   0    7.79   13.78
   5  -5   0   95.24   17.31
   5  -5   0  138.03   48.79
  -5  -5   0  161.48   60.21
   0  -5   5  163.91   45.87
   5  -5   0   97.32   21.89
   0  -4   5   61.76   25.99
   0  -4  -5   59.98   28.37
   0  -4   5   48.05   20.64
   5  -3   0 1409.36   68.76
   5  -3   0 2421.67  186.04
  -5  -3   0  676.64   76.39
   0  -3   5  112.31   32.13
   0  -3   5  109.24   35.80
   5  -3   0 2298.24  184.91
   0  -3  -5   87.20   32.48
  -5  -3   0  884.56  118.29
   0  -2   5 1905.22  112.13
  -5  -2   0  565.55   77.70
   5  -2   0  396.75   71.18
  -5  -2   0  444.17   61.98
   0  -2  -5 2127.12  192.44
  -5  -2   0  570.37   89.01
   0  -2   5 1694.80  133.52
   5  -2   0  479.84   54.67
   5  -2   0  415.46   70.29
   0  -1   5  415.52   59.83
   0  -1   5  462.45   45.67
  -5  -1   0  712.83   83.61
   5  -1   0 1447.53  105.25
   0  -1   5  447.08   63.26
   0  -1  -5  438.08   79.57
   0  -1  -5  377.02   44.93
  -5  -1   0  980.15  117.57
  -5  -1   0  784.15   83.26
   5  -1   0 1542.89  138.53
   5  -1   0 1491.85  116.18
  -5   0   0    6.16    7.96
   5   0   0    0.15    3.18
   5   0   0   -1.80    6.40
   0   0  -5   -3.61    6.71
   0   0  -5    0.14    4.14
   0   0   5    2.14    5.25
   0   0  -5   -0.33    4.07
   5   0   0    2.17    6.33
  -5   0   0   -0.25    6.50
   5   0   0    2.34    2.66
  -5   0   0    3.64    6.86
  -5   1   0 1539.85  111.68
   5   1   0  751.79   83.01
   0   1   5  444.94   73.01
   0   1  -5  461.09   49.25
   5   1   0  682.73   65.93
  -5   1   0 1812.65  168.21
   5   1   0  839.76  107.76
   0   1  -5  467.90   67.37
  -5   1   0 1442.01   90.82
   0   1  -5  473.15   70.45
  -5   2   0  389.71   39.76
   0   2  -5 2420.60  171.73
   5   2   0  588.05   93.84
   5   2   0  538.76   69.15
   0   2  -5 1837.40  103.60
   0   2   5 1459.53  140.63
   0   2  -5 2141.10  145.05
  -5   2   0  398.12   65.82
   5   2   0  485.47   62.03
  -5   2   0  315.94   67.76
   0   3   5   81.06   37.56
   0   3  -5   95.90   32.07
   0   3  -5  119.06   39.41
   5   4   0  113.28   42.21
   0   4   5   49.97   28.59
   5   5   0  135.37   45.96
   0   5   5  167.72   63.85
  -5   5   0  127.82   49.46
   0   5   5  153.28   48.71
   0   6   5  832.98  120.78
   0   6   5  829.70  148.14
  -5   6   0  129.41   52.70
   5   6   0    5.82    6.99
   0   7   5  384.29  114.86
   0   7   5  450.16   94.60
   5   7   0   84.43   43.92
   0   7  -5  449.03  115.79
  -5   7   0  768.48  144.32
   0   8   5  156.89   57.70
  -5   8   0  105.46   59.21
   5   8   0  222.51   69.96
   0   8  -5  161.57   73.94
  -5   9   0  218.91   86.38
   5   9   0  252.44   80.24
   0   9  -5  108.77   61.21
   0   9   5   93.07   47.58
   0  10   5   67.05   44.13
  -5  10   0   -9.14   17.01
   0  10  -5   55.85   45.60
   5  10   0    2.04    7.64
  -5  11   0   -9.00   32.00
   0  11  -5  158.32   80.29
   0  11   5  176.47   73.30
  -5  12   0   18.38   36.78
   5  12   0   68.92   53.25
   0  12   5   29.79   30.46
   0  12  -5   39.56   37.90
  -5  13   0   35.79   33.00
   0  13   5   48.52   37.96
   0  13  -5   81.92   62.24
   0  14   5    6.67   12.45
  -5  14   0   38.87   43.03
   5  14   0   41.23   45.61
   0  14  -5    1.99   24.95
  -5  15   0    3.37   15.57
   0  15   5   68.38   47.85
   0  15  -5   85.38   74.90
   5  16   0  113.58   81.89
   0  16   5   17.70   25.57
  -5  16   0   43.08   57.79
   0  16  -5    8.93   32.58
   0  17  -5   -5.83   32.64
   0  17   5   10.01   28.49
   5  17   0   62.10   62.88
  -5  17   0   33.26   46.21
  -1 -17  -5   -1.51   14.28
  -5 -17   1   28.27   47.24
  -5 -16   1   67.22   64.75
  -1 -16  -5   -2.97   27.78
   1 -15   5   20.79   27.48
  -5 -15   1   37.46   47.26
  -1 -15  -5   58.20   46.77
  -5 -14   1  157.41   92.73
   1 -14   5   -1.35    6.45
  -1 -14  -5  182.92   82.43
   1 -13   5   -2.12    0.95
  -5 -13   1  127.03   78.24
  -1 -13  -5   29.17   40.14
   5 -13  -1  134.18   54.68
   5 -12  -1  120.98   49.70
  -1 -12  -5   22.48   22.91
  -5 -12   1  134.43   74.71
   1 -12   5  158.10   58.99
   5 -11  -1  334.02   74.70
  -1 -11  -5   47.56   37.70
   1 -11   5   17.93   19.65
  -5 -11   1  377.57  116.15
   5 -10  -1   98.75   38.23
   1 -10   5   11.42   10.14
  -5  -9   1   71.15   47.53
   5  -9  -1   71.29   29.46
  -1  -9  -5   72.46   44.92
   1  -9   5   27.78   21.98
  -1  -8  -5  115.70   58.05
   5  -8  -1   75.93   28.43
  -5  -8   1  111.97   53.33
   1  -7   5   67.82   29.80
  -5  -7   1  225.03   74.12
  -1  -7  -5  324.34   84.96
   1  -6   5  175.98   48.35
  -1  -6  -5  443.73  100.89
   5  -6  -1  582.69   73.38
  -5  -6   1  131.25   56.90
  -1  -5  -5  179.04   51.97
   5  -5  -1  176.78   29.11
   1  -5   5  559.38   78.40
  -5  -5   1  294.97   78.23
  -1  -5  -5  145.24   53.13
   1  -5   5  514.95   81.26
   5  -4  -1  270.68   38.50
   5  -4  -1  220.01   56.74
   1  -4   5   45.87   24.26
  -1  -4  -5  299.92   57.31
   1  -4   5   40.13   20.83
   1  -3   5  337.92   56.42
   5  -3  -1 1142.79  124.17
  -5  -3   1   64.14   23.88
   5  -3  -1 1275.06   86.44
  -1  -3  -5 1440.93  120.71
   1  -3   5  329.52   57.09
  -5  -3   1   92.70   41.44
   5  -2  -1 1936.91  172.05
   1  -2   5  118.40   33.20
  -5  -2   1  372.39   68.16
  -5  -2   1  287.72   48.53
  -1  -2  -5   66.21   23.59
   5  -2  -1 1654.13  141.16
   5  -2  -1 1590.71   98.50
   1  -2   5   85.60   27.15
   5  -1  -1   93.35   31.17
  -5  -1   1  207.23   49.19
  -5  -1   1  194.22   35.94
   1  -1   5 2948.16  134.15
  -1  -1  -5 2348.44  118.32
  -5  -1   1  206.61   45.90
  -1  -1  -5 3010.10  207.46
   1  -1   5 3191.65  182.37
   5  -1  -1   93.84   31.98
   5  -1  -1   95.93   27.32
  -5   0   1  368.12   43.66
  -1   0  -5  381.89   54.72
   5   0  -1  248.21   46.04
  -1   0  -5  459.43   78.44
   5   0  -1  341.27   64.75
  -5   0   1  352.11   59.37
   1   0   5  413.17   51.05
   1   0   5  408.32   66.03
  -1   0  -5  368.62   47.01
  -5   0   1  339.66   53.59
  -1   1  -5 3037.36  192.08
   1   1   5 3250.44  207.13
  -1   1  -5 3018.92  150.22
   5   1  -1  193.99   39.68
  -5   1   1   93.83   32.42
   5   1  -1  219.93   56.86
  -5   1   1   88.01   26.99
   5   1  -1  180.66   27.61
  -1   1  -5 3272.84  172.04
  -5   1   1   92.15   24.65
  -1   2  -5  102.74   32.07
  -5   2   1 1653.44   93.91
   5   2  -1  388.74   82.28
  -1   2  -5   75.08   24.14
  -5   2   1 1646.32  143.51
  -5   2   1 1846.20  152.08
   1   2   5   73.08   31.37
  -1   2  -5  102.72   39.14
   5   2  -1  310.39   44.18
   5   2  -1  285.92   47.98
  -5   3   1 1272.96  133.60
   1   3   5 1400.07  160.44
  -1   3  -5  320.75   58.22
   5   3  -1   82.95   28.63
   1   4   5  301.38   82.20
  -5   4   1  271.36   66.27
   1   5   5  117.64   53.44
   1   5   5  129.11   42.42
   1   6   5  441.46   84.03
   1   6   5  455.33  114.87
  -5   6   1  684.78  118.12
   5   7  -1  254.54   81.18
  -5   7   1  660.07  122.11
   1   7   5  388.95  108.76
   1   7   5  419.39   88.45
  -1   7  -5   79.85   50.40
  -5   8   1   76.13   46.12
   5   8  -1  128.13   61.57
   1   8   5  130.27   68.84
   1   8   5  143.67   54.98
   1   9   5   73.04   55.48
   5   9  -1   84.84   48.16
  -5   9   1  105.77   55.46
   1   9   5   69.83   40.66
  -1   9  -5   43.21   37.93
  -5  10   1  133.74   66.44
  -1  10  -5   10.96   18.65
   5  10  -1  220.77   79.54
   5  11  -1  371.06  114.53
  -5  11   1  489.82  134.88
   1  11   5   79.94   49.16
  -1  11  -5   13.57    7.74
   1  12   5   41.37   38.55
  -5  12   1  166.08   82.21
  -1  12  -5  163.37   92.20
   5  12  -1  102.13   66.25
   1  13   5    5.96   27.98
  -1  13  -5   -0.94    7.50
   5  13  -1  116.31   73.58
  -5  13   1  186.49   95.26
  -5  14   1   14.44   29.40
  -1  14  -5   39.94   56.69
   5  14  -1  159.86   89.71
  -1  15  -5   22.05   40.21
   5  15  -1   49.37   45.24
   1  15   5   65.95   60.22
  -5  16   1   97.33   73.47
   5  16  -1   23.59   44.65
   1  16   5    1.16    5.29
  -1  17  -5   -4.40    6.82
  -5  17   1   12.39   34.77
   1  17   5    7.61   14.82
   5  17  -1   19.05   25.21
   1  17   5    5.70   13.96
  -5 -17   2    9.47   25.62
  -2 -17  -5    6.60   38.69
  -2 -16  -5   66.79   61.92
  -5 -16   2   42.86   37.79
  -5 -15   2   23.53   34.84
  -2 -15  -5   79.77   60.86
  -5 -14   2  113.27   70.88
   2 -14   5   21.56   31.57
  -2 -14  -5   36.73   35.04
  -2 -13  -5   25.42   20.82
   5 -13  -2   38.67   30.12
  -5 -13   2   79.41   63.16
   5 -12  -2   48.02   34.98
   2 -12   5   66.90   35.43
  -5 -12   2    6.11   11.54
  -2 -11  -5  103.99   58.04
   5 -11  -2  105.09   43.30
  -5 -11   2   94.46   60.85
   2 -11   5  145.57   51.87
   2 -10   5   89.78   37.61
  -5 -10   2  351.13  114.33
   5 -10  -2  228.49   59.88
  -2 -10  -5   20.63   26.58
   5  -9  -2   19.57   16.99
   2  -9   5  140.40   46.36
  -2  -9  -5  157.28   67.87
   2  -8   5  107.33   41.26
  -2  -8  -5  144.33   61.46
  -5  -8   2  171.29   77.61
   5  -8  -2  273.81   63.84
  -2  -7  -5  219.19   75.07
   2  -7   5   84.68   39.16
   5  -7  -2  104.51   38.04
   2  -7   5   60.61   30.85
  -5  -7   2  298.19   89.69
   2  -6   5   96.60   32.49
   2  -6   5   98.07   39.20
  -2  -6  -5  263.87   73.75
  -5  -6   2  246.17   72.60
   2  -5   5   48.23   25.92
   2  -5   5   57.02   27.14
  -2  -5  -5    9.34   13.02
  -5  -5   2  774.90  116.78
  -2  -5  -5   10.36    7.65
   5  -5  -2  718.35   69.44
   5  -4  -2  209.79   38.19
   2  -4   5  446.72   62.46
  -5  -4   2  818.91   85.27
   2  -4   5  561.71   96.74
   5  -4  -2  195.61   56.38
  -2  -4  -5  704.95  111.93
  -5  -4   2  963.29  126.98
  -2  -4  -5  771.26   89.20
   2  -3   5    7.96    8.32
   2  -3   5    2.50    1.92
  -5  -3   2  319.31   50.79
   5  -3  -2   48.50   25.89
   5  -3  -2   67.50   22.08
  -5  -3   2  423.93   80.23
  -2  -3  -5   77.24   25.87
   5  -2  -2  138.89   39.75
  -2  -2  -5   42.69   20.29
   2  -2   5   65.63   26.58
  -5  -2   2    0.66    1.10
   5  -2  -2  142.92   34.74
  -5  -2   2    4.79    9.92
   5  -1  -2  910.39   97.76
   2  -1   5   77.81   25.48
  -2  -1  -5   80.92   26.26
  -5  -1   2   13.87   11.86
   5  -1  -2  877.12   87.70
   5  -1  -2  900.01  105.47
   2  -1   5   81.69   31.25
  -5  -1   2   19.84   14.55
  -5   0   2  531.14   78.62
   5   0  -2  635.27   85.27
   2   0   5 1390.63  101.65
   2   0   5 1429.53  134.31
  -2   0  -5 1578.86  109.98
  -5   0   2  502.46   71.42
   5   0  -2  522.36   67.17
   2   1   5   86.43   33.79
  -2   1  -5   66.80   22.60
   5   1  -2   18.42   12.24
  -5   1   2  851.04   86.71
  -5   1   2  753.50   86.04
  -2   1  -5   82.82   27.88
   2   1   5   93.13   28.33
   5   1  -2   20.84   16.73
  -2   2  -5   59.49   21.77
   5   2  -2    2.67    4.48
  -2   2  -5   73.09   29.08
   5   2  -2    2.08    3.12
  -5   2   2  118.06   30.04
   2   2   5   36.99   25.82
  -2   3  -5   12.62   11.37
  -5   3   2   65.50   31.73
   2   3   5   78.67   39.27
  -2   3  -5   17.52   12.51
  -5   4   2  243.51   65.74
  -2   4  -5  421.82   99.99
  -2   4  -5  447.77   64.99
  -2   5  -5   61.34   27.48
  -2   5  -5   51.87   38.19
   2   5   5   25.93   27.21
   2   5   5    9.70    9.04
   2   6   5  293.28  101.86
  -2   6  -5  135.95   46.63
   2   6   5  267.78   61.17
  -2   6  -5  102.89   53.46
   2   7   5  256.21   91.44
  -2   7  -5   88.29   48.03
   2   7   5  238.49   63.32
  -5   7   2   88.69   47.53
   2   8   5  173.15   56.62
   5   8  -2  208.10   81.48
  -2   8  -5  139.53   67.03
   2   8   5  184.01   83.35
   2   9   5  163.19   58.53
  -5   9   2   25.94   25.13
   2   9   5  169.13   77.55
  -2   9  -5  146.87   72.50
   2  10   5   49.65   40.06
   2  10   5   47.09   32.49
   5  10  -2  294.36  100.22
  -2  10  -5   92.55   66.88
  -5  10   2  286.73   94.04
  -5  11   2  155.51   72.66
  -2  11  -5  195.78   90.27
   2  11   5  153.64   85.40
   5  11  -2  106.41   67.31
   2  11   5  120.53   57.00
  -2  12  -5   70.10   55.46
   5  12  -2   19.87   32.12
  -5  12   2   65.26   48.52
   2  12   5  190.99   78.17
   2  12   5  209.67  104.36
  -5  13   2   27.55   24.48
   2  13   5   28.55   39.04
   5  13  -2   58.97   48.47
   2  13   5   20.80   21.21
  -2  14  -5   28.11   38.19
   5  14  -2  133.80   86.94
   2  14   5   22.92   23.34
  -5  14   2  196.80   93.91
   2  14   5   37.30   51.22
  -5  15   2   10.19   23.31
   5  15  -2   34.51   43.88
  -2  15  -5   68.51   65.25
   2  15   5  128.43   96.04
   2  15   5  102.23   65.46
   2  16   5   64.14   67.49
  -2  16  -5   11.01   11.27
  -5  16   2   12.44   16.74
   2  16   5   62.91   49.43
   5  16  -2   58.63   57.91
   5  17  -2   -3.38   14.11
  -5  17   2   -0.11   29.77
  -2  17  -5   -9.91   31.48
   2  17   5   15.43   56.70
   2  17   5    0.85   16.07
  -3 -16  -5   96.13   71.93
  -5 -16   3  105.56   67.62
  -3 -15  -5   63.39   51.95
  -5 -15   3   52.44   40.66
  -3 -14  -5   20.39   27.06
  -5 -14   3   21.62   30.30
  -5 -13   3   66.02   52.26
  -3 -13  -5   50.38   44.76
   5 -13  -3   19.45   25.85
  -5 -12   3  165.31   72.19
   3 -12   5   -1.16    7.74
   5 -12  -3  122.32   51.96
  -3 -12  -5  105.70   61.99
   3 -11   5  235.08   58.52
  -3 -11  -5  110.03   57.98
   5 -11  -3   -2.18   11.64
  -5 -11   3  358.42  103.51
  -3 -10  -5   37.59   33.25
   5 -10  -3    5.81    4.24
   5  -9  -3   34.40   21.76
  -5  -9   3    4.65   12.43
   3  -9   5  297.87   67.07
  -3  -9  -5  163.29   69.37
   3  -9   5  245.85   75.98
   3  -8   5   54.58   24.77
  -3  -8  -5  153.54   66.30
   5  -8  -3  100.77   42.91
   3  -8   5   55.60   38.41
   3  -7   5  288.52   73.90
   3  -7   5  303.78   56.19
  -3  -6  -5   94.11   35.29
   3  -6   5  430.17   87.53
  -5  -6   3  277.64   75.61
  -3  -6  -5  105.99   50.71
   3  -6   5  520.59   74.52
   3  -5   5 1367.72  158.72
  -3  -5  -5  191.74   61.58
   5  -5  -3  271.87   47.65
  -3  -5  -5  226.30   51.10
  -5  -5   3  448.37   96.38
   3  -5   5 1271.19  102.45
  -5  -5   3  361.72   60.14
  -3  -4  -5  226.03   44.05
   3  -4   5  203.64   37.27
   3  -4   5  229.32   58.86
  -5  -4   3  604.29   67.79
   5  -4  -3  126.85   34.46
  -3  -4  -5  194.97   61.05
  -5  -4   3  753.54  113.23
   3  -3   5 1213.02  132.23
  -5  -3   3 1840.39  114.53
   5  -3  -3  135.44   39.80
   5  -3  -3  103.75   36.28
  -3  -3  -5 1010.06   79.99
  -5  -3   3 2056.15  173.59
  -3  -3  -5  933.77  126.88
   5  -2  -3   39.38   21.40
  -5  -2   3  152.26   31.32
   3  -2   5   93.66   36.62
   3  -2   5  107.61   40.52
   5  -2  -3   39.92   19.79
  -5  -2   3  194.48   49.78
   3  -1   5 1352.71  131.75
   5  -1  -3  446.43   63.19
  -5  -1   3  144.24   33.76
   3  -1   5 1317.10  115.72
   5  -1  -3  474.84   69.43
  -5  -1   3  138.58   42.55
  -5   0   3  372.88   56.01
   5   0  -3  410.38   58.72
   3   0   5   76.33   32.65
   3   0   5   80.66   28.86
  -3   0  -5   70.83   26.80
   5   0  -3  390.23   65.85
  -5   0   3  424.48   67.31
   3   1   5  263.75   61.69
   3   1   5  304.85   55.31
   5   1  -3  160.62   31.20
   5   2  -3  146.97   30.10
  -3   2  -5   94.87   27.20
   3   2   5    4.85   10.71
  -3   2  -5   94.76   38.30
  -5   2   3   54.57   21.67
   5   2  -3  136.19   22.95
  -3   3  -5  944.77  127.53
   3   3   5  949.35  131.14
  -3   3  -5 1037.28   89.06
  -5   4   3  125.47   46.87
   3   4   5  164.84   63.94
  -3   4  -5  244.92   73.47
  -3   4  -5  233.14   43.07
  -5   5   3  446.02   97.62
   3   5   5  270.73   53.16
  -3   5  -5 1037.82  147.49
   3   5   5  262.03   86.32
  -3   5  -5 1200.16  109.66
   3   6   5  123.77   60.05
  -5   6   3  163.20   63.77
   3   6   5  132.70   38.91
  -3   7  -5  260.27   82.96
  -3   7  -5  260.85   67.89
   3   7   5   82.73   35.13
  -5   7   3   28.49   25.97
   3   7   5  103.26   65.37
  -3   8  -5   23.57   26.09
  -5   8   3  126.14   58.10
   3   8   5  220.19   93.97
   3   8   5  206.02   59.52
   3   9   5  157.93   55.93
   3   9   5  153.66   81.15
  -3   9  -5  218.02   85.54
   5   9  -3   28.91   28.53
  -5   9   3   70.72   50.01
   3  10   5   34.68   37.20
  -5  10   3    5.70    6.50
   3  10   5   51.04   34.50
   3  11   5  196.82   94.15
   5  11  -3  389.19  123.64
   3  11   5  160.27   64.25
  -3  11  -5  235.35   99.54
  -5  11   3   -1.81   19.20
   5  12  -3  213.14   97.27
   3  12   5  154.02   67.92
  -3  12  -5  -14.09   29.76
   3  12   5  179.45   95.53
  -5  12   3  157.25   79.23
   3  13   5   52.51   41.98
   5  13  -3   94.63   76.17
  -5  13   3    2.71   11.34
   3  13   5   94.59   74.73
  -3  13  -5    3.80   12.34
  -5  14   3   -8.68   34.51
   3  14   5    7.76    9.79
   5  14  -3   37.24   49.33
   3  14   5   16.92   21.84
   3  15   5   86.59   59.89
  -5  15   3   54.68   51.83
   5  15  -3   88.45   73.23
   3  15   5  150.54  110.13
  -3  15  -5    2.40    9.59
  -5  16   3   79.51   65.64
   3  16   5  109.41   89.41
   3  16   5   82.93   64.95
   5  16  -3  122.61   93.37
  -3  16  -5    1.00    8.42
  -5 -16   4    0.19   23.98
   4 -16   5  -12.76   40.21
  -4 -16  -5   74.12   59.13
  -5 -15   4    5.68   22.06
  -4 -15  -5   37.39   44.05
  -4 -14  -5   33.94   37.94
   4 -14   5   -3.98   28.24
   5 -14  -4    8.96   21.39
  -5 -14   4   13.78   28.18
  -5 -13   4    3.71    6.81
  -4 -13  -5   35.28   32.38
  -5 -12   4   24.83   21.50
   5 -12  -4   23.84   23.55
   4 -12   5   10.44   19.84
   5 -11  -4   90.00   46.91
  -5 -11   4   45.84   45.99
  -4 -11  -5  466.52  130.53
   4 -11   5  344.81  103.49
   4 -11   5  425.63   80.40
  -4 -10  -5  204.68   79.54
   5 -10  -4   84.06   42.57
   4 -10   5  160.80   47.53
   4 -10   5  142.86   63.29
   4  -9   5  385.44   99.74
   5  -9  -4  352.95   86.26
   4  -9   5  440.51   69.15
  -4  -9  -5   74.90   45.35
  -5  -9   4  299.84   91.55
   4  -8   5   69.93   40.25
   5  -8  -4  384.40   84.55
   4  -8   5   99.09   31.91
  -5  -8   4  179.88   68.85
  -4  -8  -5  456.06  106.76
   4  -7   5  373.56   55.28
  -4  -7  -5  365.05   73.87
  -4  -7  -5  378.77   99.28
   4  -7   5  371.19   90.81
   4  -6   5  592.77   64.79
   4  -6   5  641.75  117.57
  -4  -6  -5  335.83   92.19
  -4  -6  -5  355.44   63.42
  -5  -6   4  326.45   83.83
  -5  -5   4  509.22   96.47
  -4  -5  -5   63.50   23.68
  -5  -5   4  469.49   64.74
  -4  -5  -5   69.80   43.47
   4  -5   5  656.84  122.28
  -4  -4  -5  116.87   27.62
  -5  -4   4   64.53   19.11
  -5  -4   4   90.96   39.51
   4  -4   5  112.82   42.87
  -4  -4  -5  116.79   48.03
  -4  -3  -5  259.95   34.57
   4  -3   5  227.86   64.22
  -5  -3   4   92.39   22.53
  -4  -3  -5  237.18   64.13
  -5  -3   4  111.32   39.17
  -5  -2   4  323.65   47.48
   5  -2  -4  144.17   36.98
  -5  -2   4  332.21   71.07
  -4  -2  -5  424.39   41.34
  -4  -2  -5  432.33   84.24
   4  -2   5  695.17  106.48
   4  -2   5  684.71  101.32
  -5  -1   4  253.13   57.78
   4  -1   5  279.86   63.12
  -5  -1   4  321.80   49.43
   4  -1   5  285.33   60.16
   5  -1  -4  205.41   44.09
  -5   0   4   29.61   24.73
   5   0  -4   26.71   13.56
   4   0   5   55.33   25.98
   4   0   5   55.55   29.77
   5   1  -4  259.47   36.24
  -4   1  -5  265.56   56.80
  -5   1   4  204.39   32.54
   4   1   5   30.67   24.82
   4   1   5   36.51   20.07
  -5   1   4  203.00   49.46
  -4   2  -5  567.01   90.74
   4   2   5  409.95   86.59
  -5   2   4  212.69   46.16
  -4   2  -5  656.83   65.15
   4   2   5  412.29   74.83
  -4   3  -5  241.37   43.16
   4   3   5  187.24   60.14
  -4   3  -5  163.67   49.00
   4   4   5  101.06   49.08
  -4   4  -5  113.39   49.03
  -4   4  -5  122.52   30.13
  -4   5  -5  444.74   96.75
  -4   5  -5  530.29   66.41
  -4   6  -5  703.91   91.32
   4   6   5  287.41   55.62
  -5   6   4   76.51   44.51
   4   6   5  331.93  100.98
  -4   6  -5  574.01  115.96
  -4   7  -5  353.31   98.65
   4   7   5  439.38  125.65
  -5   7   4  156.53   66.10
   4   7   5  451.07   76.56
  -4   7  -5  336.21   68.39
   4   8   5  602.85  155.95
  -5   8   4  492.78  117.94
   4   8   5  566.83   94.87
  -4   8  -5   51.92   38.01
  -4   8  -5   38.38   21.41
   4   9   5   83.70   40.60
  -4   9  -5  445.08  125.73
   4   9   5   84.06   53.58
  -5   9   4  458.22  121.96
  -5  10   4   75.30   51.55
   4  10   5  243.70   71.39
   5  10  -4  388.96  125.74
  -4  10  -5  134.77   72.51
   4  10   5  293.40  119.82
  -4  11  -5  318.14  120.94
   4  11   5  534.71  113.61
   4  11   5  685.09  185.74
   5  11  -4   33.24   33.32
  -5  11   4  110.95   63.81
   4  12   5  232.56   79.21
   4  12   5  260.63  114.63
  -4  12  -5   20.10   29.76
  -5  12   4   37.27   38.69
   5  12  -4    7.29   21.46
   4  13   5   32.61   30.77
   5  13  -4   18.34   38.05
   4  13   5   25.58   25.91
   4  14   5   21.35   48.31
  -5  14   4   -8.60   28.15
   5  14  -4    7.76    6.38
  -4  14  -5  -14.38   41.70
   4  14   5   27.53   34.02
   4  15   5   87.82   60.07
   4  15   5   91.70   82.64
  -4  15  -5  208.19  123.87
   5  15  -4   24.71   33.22
  -5  15   4   78.43   62.14
  -4  16  -5   -9.66   44.35
   5  16  -4  -16.39   36.15
  -5  16   4   15.39   26.93
  -5 -16   5   23.61   30.70
   5 -16   5   44.69   47.94
  -5 -16  -5    2.73   26.14
   5 -15   5   -3.56    5.95
  -5 -15  -5   38.78   46.88
  -5 -15   5   32.81   31.01
  -5 -14   5   22.56   31.80
   5 -14   5   -0.72    5.81
   5 -14  -5    5.55   22.33
  -5 -14  -5   14.33   37.77
  -5 -13   5  109.76   61.69
  -5 -13  -5   87.81   57.52
   5 -13   5   54.71   45.00
   5 -13  -5   36.89   35.03
   5 -12  -5   80.48   49.44
   5 -12   5   96.35   59.47
  -5 -12   5    8.22    4.28
  -5 -12  -5   28.40   40.25
   5 -11  -5   29.80   24.65
   5 -11   5   38.83   33.57
  -5 -11   5   39.78   31.00
  -5 -11  -5   55.20   41.75
   5 -10   5   32.07   15.59
   5 -10   5   21.99   19.29
   5 -10  -5    6.22   11.41
   5  -9   5  155.58   37.62
  -5  -9  -5   84.46   49.13
   5  -9  -5   95.43   45.54
  -5  -9   5   70.70   46.38
   5  -9   5  104.10   54.07
  -5  -8  -5  160.22   64.11
   5  -8   5  241.40   40.87
   5  -8   5  220.50   78.00
  -5  -8   5  223.93   73.16
   5  -7   5  151.86   28.88
   5  -7   5  176.81   67.92
  -5  -7  -5  285.35   64.35
  -5  -7   5  331.36   84.59
  -5  -7  -5  236.55   75.33
  -5  -6  -5  136.55   39.43
   5  -6   5  122.69   58.06
  -5  -6  -5  148.04   60.63
  -5  -6   5  218.44   69.81
   5  -5   5  254.02   72.30
  -5  -5  -5  220.22   41.15
  -5  -5   5  213.53   39.43
  -5  -5  -5  267.12   80.30
  -5  -5   5  257.97   67.91
  -5  -4  -5  498.39  104.91
  -5  -4  -5  310.50   35.97
  -5  -4   5  454.44   50.22
  -5  -4   5  565.02  102.18
  -5  -3  -5 1051.42  145.57
  -5  -3   5 1032.20   70.54
  -5  -2  -5   48.57   27.01
  -5  -2   5   53.53   27.55
  -5  -2   5   51.61   17.22
   5  -2  -5    7.29    5.49
   5  -2   5   13.86   20.60
   5  -2   5   10.95    8.52
   5  -1  -5  196.16   43.27
   5  -1   5  104.70   38.67
   5  -1   5  119.64   43.85
  -5   0  -5  117.51   27.57
  -5   0   5  154.61   45.24
   5   0   5  142.70   45.37
  -5   0  -5  130.67   43.43
   5   0   5  155.95   56.66
   5   0  -5  180.56   33.17
  -5   0   5  143.32   20.43
  -5   1   5  106.20   22.55
   5   1  -5  396.03   36.89
   5   1   5  470.11   88.60
  -5   1   5  107.54   38.88
  -5   1  -5  124.85   34.69
   5   1   5  515.21   80.43
   5   2   5   49.96   29.46
  -5   2   5    8.78   11.97
  -5   2  -5    9.65   12.82
   5   2  -5   51.82   14.47
   5   2   5   44.37   28.86
  -5   2   5    6.76    5.10
  -5   3  -5  199.60   34.59
   5   3   5 1097.86  147.52
  -5   3  -5  189.65   54.81
   5   3  -5 1328.64   88.56
  -5   3   5  257.35   58.33
  -5   4  -5   57.04   18.95
  -5   4  -5   55.24   33.40
  -5   5  -5  244.29   40.25
   5   5   5  217.68   72.94
  -5   5  -5  257.55   77.85
   5   6   5  139.17   65.19
  -5   6  -5   83.78   48.52
   5   6   5  166.81   36.91
  -5   6  -5   44.44   19.70
  -5   7   5  168.58   71.04
  -5   7  -5   96.17   29.42
   5   7   5  333.19   61.33
  -5   7  -5  131.96   61.09
   5   7   5  325.00  105.25
  -5   8  -5  177.07   79.10
   5   8   5  222.75   91.81
  -5   8  -5  128.68   34.79
  -5   8   5  267.27   93.86
   5   8   5  185.35   52.22
   5   9   5   77.13   39.35
   5   9   5   85.66   59.81
  -5   9   5  116.57   63.38
  -5   9  -5   89.25   59.17
  -5  10   5   21.97   13.68
   5  10   5  113.14   45.90
   5  10  -5  151.31   83.15
  -5  10  -5   14.89   24.04
   5  10   5  126.85   80.85
  -5  11   5   54.61   45.48
   5  11   5   38.60   27.34
   5  11   5   59.42   55.12
  -5  11  -5   27.66   26.89
   5  11  -5   90.44   66.93
   5  12   5   23.52   19.68
  -5  12  -5  107.73   84.17
  -5  12   5  103.76   63.18
   5  12  -5   52.64   51.99
   5  12   5   11.33   31.42
  -5  13   5   29.59   42.50
   5  13  -5  144.06   86.43
   5  13   5   96.28   54.87
   5  13   5  137.13   93.34
  -5  13  -5   36.41   48.66
   5  14  -5   19.90   20.02
  -5  14  -5   -1.62    7.69
  -5  14   5   -2.26    7.08
   5  15  -5   41.68   39.76
  -5  15   5  -12.16   36.60
   5  15   5   52.98   63.25
  -5  15  -5  -19.98   37.47
  -5  16   5   39.71   54.44
  -5  16  -5   48.92   67.71
   5  16   5   16.21   21.40
   5  16  -5   26.83   35.73
  -5 -16   6   11.92   19.83
   6 -16   5   14.32   16.15
  -6 -16  -5   49.60   12.86
  -6 -15  -5   17.85   38.12
  -5 -15   6    9.69   19.33
   6 -15   5   88.71   61.03
   6 -14   5  -13.77   20.20
   5 -14  -6  158.96   74.65
  -5 -14   6  131.08   67.69
  -6 -14  -5   28.40   39.77
  -6 -13  -5   15.94   19.85
   5 -13  -6    9.67    4.93
  -6 -12  -5  134.25   71.70
   6 -12   5   77.85   49.16
  -5 -12   6    4.35   12.35
   5 -12  -6   64.01   42.54
  -5 -11   6   75.40   42.15
  -6 -11  -5    3.21   19.54
   6 -11   5   35.54   33.68
   5 -11  -6   41.10   33.08
  -6 -10  -5  184.20   82.19
   5 -10  -6  106.99   54.86
   6 -10   5   96.09   55.49
   6  -9   5  210.04   82.51
  -6  -9  -5   18.33   24.40
   6  -8   5   70.84   47.14
  -5  -8   6    1.84   15.43
   6  -7   5  111.65   69.06
  -6  -7  -5   71.31   44.61
  -5  -7   6  159.91   57.21
   6  -6   5  124.76   55.69
  -6  -6  -5   65.79   42.67
   6  -5   5  186.11   68.99
  -5  -5   6  541.07  109.04
  -5  -5   6  407.73   49.26
  -6  -5  -5   63.77   39.52
  -5  -4   6  443.12   97.70
  -5  -4   6  301.51   36.60
   6  -4   5  335.52   89.76
  -6  -4  -5  504.93  103.84
   6  -3   5  166.13   62.16
  -5  -3   6  376.90   38.54
  -5  -3   6  369.57   82.92
  -6  -3  -5  322.09   80.35
  -5  -2   6   34.06   25.10
   5  -2  -6   31.49   18.14
   5  -1  -6  273.86   45.31
  -5  -1   6  179.51   56.42
  -6  -1  -5  115.96   45.16
   6  -1   5  403.80   80.17
   6  -1   5  451.38   86.89
  -6   0  -5  912.28   79.28
  -5   0   6  879.59  120.40
   6   0   5  860.88  126.08
   5   0  -6  896.24   66.76
   6   0   5  845.41  122.52
  -5   0   6  820.72   60.62
  -6   0  -5  735.03  102.33
   6   1   5  146.33   50.13
  -6   1  -5  454.76   67.35
   5   1  -6  135.95   29.05
  -5   1   6  242.78   41.46
  -5   1   6  212.58   55.13
   6   1   5  146.94   47.13
  -6   1  -5  368.83   65.72
  -5   2   6   53.72   24.55
   5   2  -6   43.72   16.27
  -6   2  -5  262.27   59.52
   6   2   5  109.20   41.33
  -6   2  -5  242.39   48.78
   6   2   5   80.88   36.47
  -6   3  -5   70.82   19.76
  -6   3  -5   91.17   38.82
   5   3  -6  451.01   57.67
  -6   3  -5   97.80   27.81
  -5   3   6    9.49    5.95
   6   3   5  401.14   95.95
   5   4  -6  466.99   65.77
  -6   4  -5  327.71   78.67
  -6   4  -5  226.31   34.18
  -5   4   6  489.16   95.51
   6   4   5  475.33  105.25
   6   5   5   86.19   50.10
  -6   5  -5   42.34   14.06
  -6   5  -5  154.10   59.44
  -6   6  -5   71.12   46.37
  -6   6  -5   46.22   15.31
   6   6   5   92.90   25.74
   6   6   5  106.59   52.99
  -6   7  -5  100.12   54.93
   6   7   5   48.92   46.65
   6   7   5   82.25   28.84
  -6   7  -5   48.51   13.90
   6   8   5  337.78   66.40
  -6   8  -5   66.96   46.62
   6   8   5  324.91  118.12
  -5   9   6   31.29   40.82
   6   9   5   12.39   20.54
   6   9   5    5.59    5.68
  -6  10  -5  123.96   76.41
   6  10   5  234.05  112.29
  -5  10   6  130.24   72.12
   6  10   5  184.61   57.25
   6  11   5   15.21   17.61
   5  11  -6   89.34   73.33
  -6  11  -5   45.03   54.31
   6  11   5   32.80   46.88
  -5  11   6   29.61   20.88
  -5  12   6   70.97   62.68
  -6  12  -5  122.09   82.36
   6  12   5  150.00   86.02
   5  12  -6   11.77   41.67
  -5  13   6   14.61   18.18
  -6  13  -5  206.71  114.94
   5  13  -6  135.92   81.38
   6  13   5   54.73   72.63
  -5  14   6  186.55   99.84
  -6  14  -5  -14.38   37.39
   6  14   5   30.33   46.60
   5  14  -6  176.93   98.22
  -5  15   6   28.57   38.05
   6  15   5   28.07   68.17
   5  15  -6   10.14   33.53
  -6  15  -5   90.73   76.52
   6  16   5   33.96   56.43
  -6  16  -5    3.33   16.06
   5  16  -6   17.15   24.99
  -5  16   6   25.00   41.47
  -4 -16   6   45.39   37.79
   6 -16   4  -17.08   35.62
  -6 -16  -4   39.21   60.37
   4 -15  -6    5.12   22.51
   6 -15   4    6.06   32.41
  -6 -15  -4   83.59   79.36
  -4 -15   6   92.62   58.75
   4 -14  -6   17.48   28.25
  -4 -14   6   18.02   27.95
  -6 -14  -4   45.84   37.00
   4 -13  -6   12.31    7.44
   6 -13   4   30.90   32.99
  -4 -13   6    2.57   14.94
  -4 -12   6   87.55   51.09
   6 -12   4    0.04   19.91
   4 -12  -6  124.65   62.29
  -6 -12  -4  129.40   76.29
  -4 -11   6   50.16   33.45
   6 -11   4   13.58   24.29
   4 -10  -6   12.04   16.39
   6 -10   4  182.88   72.66
  -4 -10   6  167.68   67.61
  -6 -10  -4    9.49   20.18
   6  -9   4  118.34   24.23
  -6  -9  -4   39.63   35.00
  -4  -9   6  274.66   84.51
   6  -9   4  208.64   79.80
   4  -9  -6  168.58   65.15
  -4  -8   6   54.53   33.95
   6  -8   4  108.44   53.80
   6  -7   4   66.42   44.06
  -6  -7  -4  226.07   76.95
   6  -6   4   47.58   40.62
  -6  -6  -4   50.53   30.55
  -6  -5  -4   50.99   34.73
   6  -5   4  320.15   85.47
  -4  -4   6   32.40   12.16
  -4  -4   6   59.68   32.40
  -6  -3  -4  812.67  116.36
   6  -3   4  510.81  101.57
   6  -3   4  727.55  126.14
  -4  -3   6  614.05  102.24
  -6  -2  -4   39.12   23.12
   6  -2   4   18.91   17.90
   6  -2   4   17.64   12.37
  -6  -1  -4 1706.86  149.89
   6  -1   4 2079.05  181.77
   6  -1   4 2337.86  191.09
  -4   0   6   62.24   21.08
   4   0  -6   54.55   13.23
  -4   0   6   57.91   29.51
  -6   0  -4 1116.02   74.15
  -6   0  -4  876.30   98.67
   6   0   4 1110.03  128.16
   6   0   4 1138.69  138.43
   4   0  -6   38.53   19.24
   6   1   4 1701.38  159.13
  -4   1   6  231.76   55.36
  -4   1   6  262.79   48.50
  -6   1  -4 1778.37  128.66
   4   1  -6  910.89   81.98
   6   1   4 1833.66  158.50
  -6   1  -4 2392.72  146.26
  -6   2  -4   11.03   11.28
  -4   2   6  247.52   53.65
  -6   2  -4    8.87    8.85
   4   2  -6  232.55   40.60
   6   2   4   63.35   31.50
   6   2   4   48.34   29.63
  -6   3  -4  445.96   47.42
   6   3   4 1070.33  142.71
  -6   3  -4  761.51  116.12
   4   3  -6  614.26   73.25
  -6   3  -4  412.40   39.14
  -4   3   6  913.81  123.63
   4   4  -6   63.45   26.43
  -4   4   6   33.69   22.84
  -6   5  -4  292.30   86.52
   6   5   4   61.20   17.06
  -4   5   6  327.70   86.95
   6   5   4   64.40   40.92
   6   6   4   44.90   35.28
  -6   6  -4   55.10   42.60
   6   6   4   48.25   18.95
  -6   7  -4   62.58   49.39
   6   7   4  252.82   90.87
   6   7   4  309.65   60.37
  -6   8  -4  129.33   72.29
   6   8   4  661.47  102.23
  -4   8   6   56.52   42.80
   6   8   4  582.80  144.80
   6   9   4   42.22   32.52
  -6   9  -4  252.89  104.78
  -4   9   6  192.24   81.08
   6   9   4   47.53   36.17
  -4  10   6   14.65   22.20
   4  10  -6  229.86  107.13
  -6  10  -4  204.44  101.61
   6  10   4    3.54   14.26
   6  10   4   -4.56    8.46
   6  11   4  262.94   84.98
  -4  11   6  153.45   77.36
   6  11   4  284.27  120.96
   4  11  -6   85.27   63.34
  -6  11  -4    4.67    4.48
  -4  12   6  136.76   75.80
   6  12   4  169.84   93.63
  -6  12  -4   15.55   31.21
   6  12   4  132.66   66.10
   4  12  -6  158.50   85.98
  -6  13  -4   55.57   61.75
   6  13   4  165.92   78.37
   6  13   4  185.09  107.95
  -4  13   6   25.87   29.17
   4  13  -6   28.40   47.47
   4  14  -6   10.64   39.50
  -4  14   6    3.67   14.95
   6  14   4   32.89   64.12
  -4  15   6    5.46   22.70
   6  15   4  105.20  100.16
  -6  15  -4    8.82   16.08
   4  15  -6   82.10   69.99
   4  16  -6   45.51   39.46
  -6  16  -4    5.38   43.01
   6  16   4   49.08   63.95
  -4  16   6   78.92   55.82
  -3 -16   6    3.52    7.98
   3 -16  -6    5.92   14.52
  -6 -16  -3   31.06   45.18
   6 -16   3    5.75   31.99
   3 -15  -6   53.39   40.14
   6 -15   3   67.91   48.28
  -6 -15  -3   59.17   64.92
  -3 -15   6   15.85    3.44
   6 -14   3   14.11   22.35
  -3 -14   6   44.72   35.25
   3 -14  -6   -8.77   20.26
  -6 -14  -3   16.95   25.58
   6 -13   3   71.98   51.80
  -3 -13   6   64.41   43.20
   3 -13  -6   96.06   57.85
  -6 -13  -3   13.27   20.84
   6 -12   3   63.66   45.36
   3 -12  -6   26.78   30.09
  -6 -12  -3    3.84   21.63
   6 -11   3   28.45   30.83
  -6 -11  -3   -4.16   17.82
   6 -10   3    3.47   10.49
   3 -10  -6   23.82   25.01
  -6 -10  -3    8.03    4.60
   6  -9   3   57.35   18.60
   6  -9   3  139.34   61.42
  -3  -9   6   40.97   33.20
  -6  -9  -3   11.97   12.59
   3  -9  -6  198.94   73.14
  -6  -8  -3  476.41  118.37
  -3  -8   6  275.79   75.62
   6  -7   3   13.15   21.34
  -6  -7  -3   96.75   49.82
  -3  -7   6  167.54   55.88
  -3  -6   6   11.30    5.07
   6  -6   3  190.46   67.37
  -6  -6  -3  171.45   64.75
  -3  -5   6    9.91   11.81
  -6  -5  -3  145.63   55.54
   6  -4   3  184.58   60.64
  -6  -4  -3  471.20   96.54
   6  -3   3   34.96   23.16
   6  -3   3   30.06   27.00
   6  -2   3  533.00  104.23
  -3  -2   6   68.12   33.96
   6  -2   3  365.88   69.36
  -6  -2  -3   34.53   21.16
   3  -1  -6   67.11   28.54
   6  -1   3  168.39   41.11
  -6  -1  -3   34.76   20.24
  -3  -1   6  397.05   55.43
   6  -1   3  163.27   48.49
  -3  -1   6  384.48   74.22
   6  -1   3  218.66   56.65
   6   0   3 1797.63  157.73
  -3   0   6  258.01   45.91
  -3   0   6  228.41   53.81
   6   0   3 1414.28   96.89
  -6   0  -3 1290.56  114.03
   6   0   3 1639.85  147.89
   6   0   3 1614.32  125.97
   3   0  -6  215.71   48.34
  -6   0  -3 1775.58   97.98
  -6   1  -3  137.75   32.70
   6   1   3   53.87   24.84
  -3   1   6   91.96   29.52
   6   1   3   46.48   24.01
   6   1   3   45.64   24.49
   3   2  -6   53.00   21.70
   6   2   3   51.54   32.82
  -3   2   6   41.41   21.92
   6   2   3   57.60   31.29
  -6   3  -3   45.15   25.61
   6   3   3  617.54  102.54
   6   3   3  708.35  103.86
  -3   3   6  256.97   64.54
   3   3  -6  305.56   54.44
  -6   4  -3  106.55   46.17
  -3   4   6  604.31  113.93
   6   4   3  776.10   62.03
   6   4   3  588.64  109.18
   3   4  -6 1177.04  121.87
  -6   5  -3  375.15   89.75
   6   5   3  149.05   57.79
  -3   5   6  328.11   88.59
   6   5   3  199.44   39.75
  -6   6  -3  191.71   74.51
  -3   6   6  229.32   76.86
   6   6   3  176.60   72.01
   6   6   3  222.82   49.91
   6   7   3  136.10   47.02
  -6   7  -3    6.96    7.25
   6   7   3  106.57   58.01
   6   8   3  535.40  142.74
   6   8   3  619.39  112.66
  -6   8  -3   42.13   40.04
  -3   8   6   44.57   32.63
  -6   9  -3  182.09   82.16
   6   9   3   14.14   19.32
   6   9   3   22.23   22.86
  -3   9   6  260.13   89.78
  -3  10   6   49.02   37.76
  -6  10  -3    3.57   18.16
   6  10   3   23.81   21.32
   6  10   3   22.95   27.39
   6  11   3   19.84   29.03
  -6  11  -3    4.82   30.05
   6  11   3   24.54   26.26
  -3  12   6   39.21   35.04
   6  12   3   43.63   44.44
  -6  12  -3  112.05   73.11
   3  12  -6  220.25  101.79
   6  12   3   38.97   42.67
  -6  13  -3  121.35   79.21
  -3  13   6  100.36   62.74
   6  13   3   17.26   34.43
   3  13  -6   71.45   56.91
   6  13   3    4.74   30.60
  -3  14   6   10.30   30.13
   6  14   3   25.31   34.03
   6  14   3    5.50    8.33
  -6  14  -3   30.55   44.00
   3  14  -6   47.71   53.15
   6  15   3  104.13   89.43
   3  15  -6   33.85   35.30
  -3  15   6   80.51   61.57
  -6  15  -3   72.11   58.43
  -3  16   6    4.57    3.81
  -6  16  -3    3.15   16.96
   3  16  -6   -6.00   10.48
  -2 -16   6   54.70   47.83
  -6 -16  -2   15.86   31.01
   2 -16  -6   63.12   56.74
  -2 -15   6  113.31   61.24
   2 -15  -6   31.51   34.81
  -6 -15  -2  167.68   94.89
  -2 -14   6   -4.89   23.80
   2 -14  -6    2.85    4.22
  -6 -14  -2   11.36   24.59
  -2 -13   6    9.11    9.53
   2 -13  -6   14.08    9.28
  -6 -13  -2   13.64   43.71
   6 -12   2   73.73   56.94
   2 -12  -6  226.99   88.04
  -2 -12   6  142.33   64.82
  -6 -12  -2  106.20   73.91
   2 -11  -6   21.60   14.41
   6 -11   2   48.17   35.09
  -2 -10   6   24.43   12.08
   6 -10   2    1.11    4.93
   6 -10   2    2.76   16.53
  -2  -9   6   23.45   22.04
   6  -9   2   66.54   19.22
  -6  -9  -2  240.64   95.65
   2  -9  -6   81.06   44.96
   6  -9   2  178.66   69.61
   2  -8  -6  240.70   76.53
   6  -8   2  374.45   96.46
  -6  -8  -2  179.68   76.50
   6  -8   2   56.54   14.65
  -2  -8   6  252.42   69.08
   6  -7   2   37.92   26.70
  -2  -7   6   39.06   25.74
   6  -6   2  886.11  144.37
  -6  -6  -2  800.99  150.92
  -2  -5   6   76.39   37.70
   6  -5   2  257.64   77.89
  -2  -4   6  258.15   39.08
  -2  -4   6  292.38   68.42
   6  -4   2  149.64   57.49
  -6  -4  -2  165.69   59.29
  -6  -3  -2  245.51   67.38
  -2  -3   6   63.97   33.34
  -2  -3   6   52.27   13.69
   6  -3   2  313.32   77.92
   6  -3   2  289.89   68.21
   6  -2   2  367.77   66.89
   6  -2   2  491.14   95.33
  -6  -2  -2 1540.74  156.34
  -2  -2   6 1109.10  122.01
   2  -2  -6  914.77  118.58
   6  -1   2  501.17   86.45
  -2  -1   6   62.31   23.52
  -2  -1   6   73.31   32.47
  -6  -1  -2  931.08  118.86
  -6  -1  -2  849.48  108.38
   6  -1   2  455.92   69.27
   6  -1   2  408.86   55.62
   6  -1   2  519.33   78.98
   2  -1  -6  352.18   71.62
  -2   0   6  138.50   39.88
   6   0   2   34.05   18.85
   6   0   2   32.56   16.51
   6   0   2   34.06   20.81
   2   0  -6   97.91   15.41
   2   0  -6  129.28   38.61
  -2   0   6  140.04   36.08
  -6   0  -2   13.00   14.88
   6   0   2   25.55   18.77
  -6   0  -2   11.32   17.02
  -6   1  -2  592.52   71.51
   2   1  -6   50.71   22.85
  -6   1  -2  472.18   63.58
  -2   1   6  323.14   61.42
  -6   1  -2  512.36   83.62
   6   1   2  839.81  107.00
   6   1   2  932.84  113.60
   6   1   2  814.46   95.03
   6   1   2  927.26   69.48
   2   2  -6 1028.06  102.11
   6   2   2 1611.17  149.89
  -2   2   6 1021.69  118.15
  -6   2  -2  405.37   49.31
   6   2   2 1572.88   77.91
   6   2   2 1620.15  141.67
  -6   2  -2  392.29   65.61
  -2   3   6   46.42   32.54
   6   3   2  252.63   58.26
   2   3  -6   51.19   23.68
   6   3   2  341.03   69.47
  -6   3  -2  321.84   68.28
  -2   4   6  288.31   80.80
   6   4   2  176.26   55.33
   6   4   2  211.40   43.75
  -6   4  -2   77.46   37.74
   6   5   2  550.89  112.26
   6   5   2  571.76   76.70
  -6   5  -2  355.27   86.31
  -6   6  -2  915.94  149.46
   6   6   2 1000.03  162.24
   6   6   2  953.54  111.16
   6   7   2  312.69   97.46
   6   7   2  345.76   75.63
  -6   7  -2   43.66   37.26
  -2   7   6   94.91   48.19
  -2   7   6   76.87   46.72
   6   8   2  209.20   66.00
  -6   8  -2  408.68  110.34
   6   8   2  208.00   83.61
  -2   8   6  273.95   83.87
  -2   9   6   65.81   46.64
  -6   9  -2  199.35   84.45
   6   9   2  258.24   76.75
   2   9  -6   28.87   35.45
   6   9   2  238.20   92.60
  -6  10  -2   10.08   33.66
   6  10   2  112.20   65.40
   6  10   2   86.42   48.42
  -2  10   6   58.25   40.83
   2  10  -6    6.80    8.70
  -2  11   6   34.42   34.35
   6  11   2  517.67  129.02
  -6  11  -2   84.99   59.75
   6  11   2  438.27  137.75
   2  11  -6  200.70   99.62
  -2  12   6  279.60  101.07
  -6  12  -2   83.89   59.76
   6  12   2  106.38   61.50
   2  12  -6  164.12   88.64
   6  12   2  115.53   78.27
   6  13   2    6.36   23.31
   6  13   2   20.43   14.91
   2  13  -6    9.70   26.65
  -2  13   6   41.81   37.91
  -2  14   6    7.12   20.47
   2  14  -6   -3.70   24.46
   6  14   2    4.38   23.73
   6  14   2    6.72   26.50
  -6  14  -2   61.48   59.66
  -2  15   6   67.94   57.73
  -6  15  -2   95.08   73.51
   6  15   2  232.19  125.92
   2  15  -6  145.95   90.93
   6  15   2  207.66  102.89
  -2  16   6   39.29   47.35
   6  16   2   36.81   57.56
  -6  16  -2    1.22   19.07
   2  16  -6   61.77   77.79
   1 -16  -6   30.69   38.75
  -1 -16   6    7.71    6.62
  -6 -16  -1   -2.56   35.13
  -1 -15   6   84.11   50.23
  -6 -15  -1   36.16   36.69
   1 -15  -6   12.45   29.11
   1 -14  -6  118.45   62.41
  -1 -14   6   62.16   44.26
  -6 -14  -1   54.25   55.12
  -1 -13   6  265.24   87.28
  -6 -13  -1  326.41  122.90
   1 -13  -6   -0.33   16.43
  -1 -12   6    9.27   19.02
   1 -12  -6   14.42   26.30
   1 -11  -6   13.96   27.83
  -1 -11   6  231.58   77.13
  -6 -11  -1  129.15   76.30
  -1 -10   6   61.93   37.04
   6 -10   1  208.63   50.50
   6  -9   1   15.18   14.86
   6  -9   1   15.88   11.33
   1  -9  -6   11.81    4.77
   6  -8   1  103.30   50.68
  -6  -8  -1    9.59   25.57
  -1  -8   6   59.75   33.97
   6  -8   1   61.30   19.59
   6  -7   1  257.82   77.22
   1  -7  -6  147.60   57.65
   6  -7   1  114.96   16.02
  -6  -7  -1  372.20  109.74
   6  -7   1   43.38   13.79
   6  -6   1  541.40  106.40
  -1  -6   6  357.60   80.25
  -1  -5   6  251.08   61.02
   6  -5   1  106.74   46.42
  -1  -5   6  218.24   45.90
  -1  -4   6  277.91   46.52
  -1  -4   6  315.71   68.65
   6  -4   1  376.51   94.72
  -6  -3  -1   84.69   40.39
  -1  -3   6   91.56   23.99
  -6  -3  -1   92.01   36.68
  -1  -3   6  104.69   37.33
  -1  -2   6  388.41   70.92
   1  -2  -6   49.17   29.68
  -1  -2   6  296.19   31.10
  -6  -2  -1  864.33  123.04
   6  -2   1  690.63   96.59
   6  -2   1  416.28   47.99
   6  -2   1  668.88  106.17
  -6  -2  -1  955.05  121.48
   6  -1   1  159.62   42.51
   1  -1  -6   29.27   22.07
  -6  -1  -1  644.11   90.71
  -1  -1   6    2.24    3.26
  -6  -1  -1  598.39   87.80
   6  -1   1  168.45   51.50
   1  -1  -6   23.00    9.83
   6  -1   1  133.38   32.17
  -1  -1   6    7.18    8.60
   6   0   1  172.08   39.22
   1   0  -6  736.04   95.44
   1   0  -6  651.95   49.63
   6   0   1  124.28   37.74
  -1   0   6  793.86   88.99
   6   0   1  135.88   40.82
  -6   0  -1  161.08   42.57
  -6   0  -1  174.37   46.06
   6   0   1  153.98   34.16
   6   1   1  445.77   63.97
  -1   1   6    5.00    8.45
   6   1   1  451.02   75.03
  -6   1  -1  185.67   42.03
  -6   1  -1  162.55   43.88
   1   1  -6   27.53   10.14
   1   1  -6   28.30   16.70
   6   1   1  552.38   83.49
  -6   1  -1  145.61   32.81
   6   1   1  514.13   56.79
   1   2  -6  372.25   65.69
   6   2   1  697.98   90.66
  -6   2  -1  594.56   82.77
  -6   2  -1  630.20   84.85
  -6   2  -1  563.78   49.41
   6   2   1  680.96   87.37
   6   3   1   73.61   31.92
   6   3   1   89.37   32.46
   6   4   1   11.03    5.34
  -6   4  -1  303.42   67.99
  -1   5   6  153.17   61.92
  -6   5  -1  131.69   50.08
   6   5   1  780.24  111.57
   6   5   1  654.87  115.03
   6   6   1  636.18  126.53
   6   6   1  759.86  116.33
  -6   6  -1  727.66  129.85
  -1   7   6  162.35   67.51
  -1   7   6  178.60   62.44
   6   7   1  386.97  102.87
   6   7   1  363.56   79.85
  -6   7  -1  280.71   90.97
  -6   8  -1  121.62   65.60
  -1   8   6  403.54  120.19
   6   8   1    5.57   13.59
   1   8  -6   72.47   56.59
   6   8   1   -3.11   11.28
  -1   8   6  423.47  103.65
  -1   9   6   15.54   20.68
  -6   9  -1   38.41   41.50
   1   9  -6  415.38  126.81
   6   9   1  765.91  136.61
  -1   9   6   14.76   15.96
   6   9   1  664.91  150.09
  -6  10  -1  329.49  114.86
  -1  10   6  389.62  110.30
   6  10   1  800.41  157.14
   6  10   1  775.63  172.29
   1  10  -6   53.72   46.55
  -6  11  -1   68.57   60.81
  -1  11   6   15.04   25.17
   1  11  -6  185.12   86.66
   6  11   1  146.22   73.43
   6  11   1  145.17   70.50
  -1  12   6   26.94   31.97
   1  12  -6   -5.45   15.86
   6  12   1   72.95   51.05
  -6  12  -1   70.48   53.34
   6  12   1   85.75   61.04
   1  13  -6  278.01  116.23
   6  13   1  281.46  111.62
  -1  13   6   10.28   21.92
  -6  13  -1   45.35   40.34
  -1  14   6  187.58   88.34
  -6  14  -1   65.95   69.01
   6  14   1   46.33   49.48
   1  14  -6   52.47   37.24
  -1  15   6   -1.88   19.72
  -6  15  -1  -16.43   40.76
   6  15   1   31.85   49.60
   6  15   1   26.24   48.77
   1  15  -6   81.45   68.82
  -1  16   6   25.10   22.85
  -6  16  -1   71.25   65.02
   6  16   1   20.79   38.89
   6  16   1   27.06   23.01
   1  16  -6   18.93   33.66
   0 -16  -6   93.74   64.96
  -6 -16   0   23.77   44.70
   0 -15  -6   61.79   52.82
  -6 -15   0   38.17   50.82
   0 -15   6   65.21   40.07
   0 -14   6  -11.51   21.49
   0 -14  -6   17.95   29.97
   0 -13   6   27.21   21.69
   0 -13  -6   20.24   25.26
  -6 -13   0   56.07   51.78
   0 -12  -6  104.37   59.32
   0 -12   6  139.25   58.31
  -6 -12   0   19.85   26.68
   0 -11  -6   33.58   32.59
   6 -11   0  106.80   44.12
   0 -11   6   39.57   29.16
   0 -10  -6   61.59   41.85
   6 -10   0   32.41   21.48
   0 -10   6   69.05   36.14
   6  -9   0  115.13   35.26
  -6  -9   0   65.08   50.75
   0  -9   6  366.71   84.38
   0  -9  -6  296.69   88.91
   0  -8  -6  196.08   74.47
   0  -8   6  279.11   71.35
   6  -8   0   41.28   18.77
  -6  -8   0    8.70   18.74
   6  -7   0  225.24   38.83
   0  -7  -6  472.55  108.82
   6  -7   0  338.44   87.39
   6  -7   0  213.13   29.88
   0  -7   6  605.95  104.52
  -6  -7   0  263.73   86.94
   6  -6   0  193.46   26.85
   0  -6   6   88.09   35.87
   6  -6   0  333.20   81.86
   6  -6   0  232.93   36.59
   0  -6   6   93.00   37.22
  -6  -6   0  376.98   98.52
   6  -5   0    1.02    7.84
   0  -5   6  903.96  113.57
   0  -5   6  780.94   93.53
   6  -5   0    3.38    3.94
   6  -5   0    4.67    4.12
  -6  -5   0  114.47   50.31
   0  -4   6   80.18   34.21
   0  -4   6   68.46   28.73
   6  -4   0   73.23   16.36
  -6  -4   0    0.31    6.81
   6  -3   0  234.53   67.29
   0  -3   6  274.05   48.14
   6  -3   0  179.40   31.83
   0  -3   6  259.55   57.48
  -6  -2   0  191.33   49.08
   6  -2   0  236.44   56.85
   0  -2   6  130.36   38.91
   6  -2   0  252.79   64.62
   0  -2   6  132.08   25.88
   6  -2   0  159.35   39.06
  -6  -2   0  158.23   52.20
   0  -1   6  728.99   58.14
   6  -1   0   65.65   32.79
   0  -1  -6  627.53   59.41
   6  -1   0   61.93   25.63
   0  -1   6  819.40   95.12
   6  -1   0   57.87   24.12
  -6  -1   0   48.15   21.22
  -6  -1   0   35.47   20.18
  -6   0   0    8.66   10.74
   6   0   0    1.88    4.76
   6   0   0    2.74    4.89
  -6   0   0    6.81    8.34
   6   0   0    6.77    6.13
   0   0  -6    1.62   10.27
   0   0   6    1.57    3.68
   6   0   0    5.52    8.94
   0   0  -6   -1.39    3.44
   0   1   6  851.84  106.36
  -6   1   0   67.53   27.62
   0   1  -6  839.22  107.19
   6   1   0   43.17   24.46
   0   1  -6  828.60   72.43
  -6   1   0   63.11   21.14
   6   1   0   35.69   17.18
   6   1   0   45.42   24.74
  -6   2   0  211.68   34.48
   6   2   0  139.34   37.78
   0   2   6  128.27   42.15
   0   2  -6  121.68   27.56
   6   2   0  146.23   37.54
  -6   2   0  260.98   57.01
  -6   2   0  279.80   55.07
  -6   3   0  181.53   24.68
   0   3   6  226.73   65.12
  -6   3   0  234.83   59.09
   0   4   6   52.34   36.56
   6   4   0    0.58    6.38
  -6   5   0   -0.99   14.59
   6   5   0  120.50   48.49
   0   6   6  116.91   56.69
   6   6   0  377.93   90.60
  -6   6   0  378.28   90.03
   6   7   0  314.39   84.14
   0   7   6  588.46  140.57
   6   7   0  255.74   79.31
   0   7  -6  615.52  146.46
   0   7   6  568.47  106.32
  -6   7   0  390.77  100.26
   0   8   6  241.62   74.88
  -6   8   0   73.79   45.59
   6   8   0    4.48    7.63
   0   8   6  254.11   98.76
   0   8  -6  263.48   97.90
   6   8   0   13.61   21.64
   0   9  -6  355.63  121.74
   0   9   6  338.68  120.96
   0   9   6  307.91   86.77
   6   9   0   50.52   30.02
  -6   9   0  171.70   76.54
   0  10   6   51.21   48.42
  -6  10   0   46.03   44.62
   0  10   6   41.19   27.40
   0  10  -6   58.83   44.67
   0  11  -6   47.30   36.94
  -6  11   0  150.56   78.55
   0  11   6   54.28   57.54
   6  11   0  180.70   77.66
   0  11   6   62.73   44.97
   0  12   6  147.38   73.10
  -6  12   0   17.92   17.90
   6  12   0   39.02   38.90
   0  12   6  128.35   83.51
   0  12  -6  143.13   79.17
   6  13   0   67.71   54.78
   0  13   6   62.35   55.17
  -6  13   0  133.93   82.18
   0  13  -6   37.52   48.18
   0  13   6   47.93   40.83
   0  14   6    4.76   17.90
  -6  14   0   21.50   30.64
   0  14  -6    6.34   22.61
   0  14   6    1.59   45.89
   6  15   0   19.23   35.53
   0  15  -6   85.96   66.53
  -6  15   0   70.80   62.55
   0  15   6   63.99   67.89
   0  15   6   65.89   44.94
   0  16   6  139.79   82.61
   0  16   6  144.06  119.74
  -6  16   0  -14.54   36.70
   6  16   0   33.69   48.46
   0  16  -6  206.24  111.55
  -6 -16   1    4.77    3.88
  -1 -16  -6   19.54   31.61
  -1 -15  -6   35.43   42.02
  -6 -15   1   56.65   50.82
  -6 -14   1   62.26   63.10
  -1 -14  -6   48.10   40.94
   1 -14   6  150.66   60.95
   1 -13   6    1.98   11.02
  -1 -13  -6  196.11   81.71
  -6 -13   1  316.88  125.45
   1 -12   6   23.24   22.33
  -6 -12   1   61.58   59.19
  -1 -12  -6   -1.29   17.59
  -1 -11  -6  133.12   65.33
   6 -11  -1   60.13   28.49
   1 -11   6   18.92   17.82
  -6 -11   1  120.14   67.81
   6 -10  -1  190.03   53.39
  -1 -10  -6   44.16   38.07
   1  -9   6   19.29   22.31
   6  -9  -1   20.89   15.45
  -1  -8  -6   57.20   39.87
   6  -8  -1   60.11   26.08
  -6  -8   1   10.37   22.02
   1  -7   6  162.33   50.56
   6  -7  -1  216.56   45.02
   1  -7   6  161.61   51.71
   6  -7  -1  148.74   28.99
   1  -6   6  173.67   49.63
   6  -6  -1  439.48   51.06
   6  -6  -1  513.37   64.96
   6  -6  -1  564.70  107.33
   1  -6   6  136.96   45.96
  -6  -6   1  717.93  141.56
  -1  -6  -6  244.69   73.61
   6  -5  -1  134.44   28.55
   1  -5   6  198.38   54.21
   6  -5  -1  149.86   52.61
   1  -5   6  172.66   51.08
   6  -4  -1  346.58   46.47
   1  -4   6 1134.04  115.11
   1  -4   6 1169.14  122.21
  -6  -4   1   11.57    9.35
   6  -4  -1  284.48   69.52
  -1  -4  -6  368.49   69.88
  -6  -3   1   80.40   36.80
   6  -3  -1  684.83  110.74
  -1  -3  -6   77.09   30.43
   1  -3   6  368.44   65.12
   6  -3  -1  524.91   58.25
   1  -3   6  326.92   59.07
   1  -2   6   53.55   21.21
  -1  -2  -6  308.50   51.57
   6  -2  -1  552.10   90.27
   1  -2   6   45.20   19.47
  -6  -2   1  567.40   76.07
   1  -2   6   54.55   27.54
  -6  -2   1  730.05  100.06
   6  -2  -1  555.78   68.76
  -1  -1  -6   21.14   13.22
  -6  -1   1  556.41   83.54
  -6  -1   1  567.01   66.87
   6  -1  -1  178.53   48.76
   6  -1  -1  170.77   46.11
  -6  -1   1  552.39   83.11
   1  -1   6    7.43    6.83
   6  -1  -1  170.40   41.65
   1  -1   6    4.41    9.37
   1   0   6  799.62  100.83
  -6   0   1  154.08   43.33
  -6   0   1  188.21   36.00
  -6   0   1  155.69   39.53
   6   0  -1  146.15   38.11
  -1   0  -6  645.50   66.85
   1   0   6  790.14   75.91
   6   0  -1  185.25   50.85
  -6   1   1  160.09   38.88
  -6   1   1  159.14   34.62
  -1   1  -6   31.35   16.65
   6   1  -1  596.91   75.66
   6   1  -1  688.70  101.95
   6   1  -1  654.17   64.58
   1   1   6    5.40    1.26
   6   2  -1  760.56   73.56
   1   2   6  295.68   70.01
  -1   2  -6   47.74   19.79
  -6   2   1  754.78   76.74
   6   2  -1  768.08   84.63
   6   3  -1   76.70   27.43
  -6   3   1  732.10  107.65
   1   3   6   81.46   38.94
  -6   3   1  532.11   53.21
   1   4   6  230.83   79.39
  -6   4   1  315.62   73.86
   1   5   6  222.20   75.92
  -6   5   1  123.26   50.10
   1   6   6  315.70   99.98
   6   6  -1  618.42  108.61
  -1   6  -6  157.66   75.39
  -6   6   1  650.17  120.22
   1   7   6  584.88  105.53
   1   7   6  631.28  150.68
  -1   7  -6  164.28   75.66
  -6   7   1  233.68   78.29
  -6   8   1  125.32   58.97
   1   8   6   55.54   35.35
   1   8   6   43.66   45.08
   6   8  -1    2.24   16.08
   1   9   6  347.48  115.83
   1   9   6  339.35   91.33
  -6   9   1   32.43   33.10
  -1   9  -6    1.71   34.09
   1  10   6   69.43   41.80
  -1  10  -6  405.42  124.74
  -6  10   1  301.20  101.10
   1  10   6   44.79   41.84
   1  11   6  188.77  105.68
  -6  11   1   93.83   53.85
  -1  11  -6   -2.85   24.33
   6  11  -1  156.60   73.11
   1  11   6  194.05   77.46
   1  12   6   -0.20   23.11
  -6  12   1   61.97   47.22
   6  12  -1   99.50   62.49
  -1  12  -6   17.81   31.20
   1  12   6    5.37   20.46
  -6  13   1   31.92   35.81
  -1  13  -6    1.39   28.54
   1  13   6  256.37  124.17
   6  13  -1  406.19  136.89
   1  13   6  224.55   88.72
   1  14   6   43.25   42.18
  -6  14   1   37.44   45.33
   1  14   6   42.95   53.48
   6  14  -1   71.94   58.20
  -1  14  -6  212.36  116.58
   1  15   6   76.85   53.12
  -6  15   1   10.13   29.64
   6  15  -1   16.22   17.25
  -1  15  -6   27.02   41.75
   1  15   6   52.07   59.22
   1  16   6    4.31   15.79
   1  16   6   -7.94   51.52
   6  16  -1   -4.81   24.37
  -1  16  -6   26.68   34.04
  -6  16   1   61.76   53.79
  -2 -16  -6   20.64   29.89
  -6 -16   2   31.91   39.29
  -2 -15  -6   75.79   59.42
  -6 -15   2  165.12   85.14
  -6 -14   2    6.68   27.30
  -2 -14  -6    4.68    4.91
  -6 -13   2    6.68    8.79
  -2 -13  -6   12.51   25.33
   2 -13   6   39.73   26.86
  -2 -12  -6  101.27   55.16
  -6 -12   2   95.61   63.25
   6 -12  -2   73.72   35.23
   2 -11   6   39.74   29.82
   6 -11  -2   54.42   30.14
  -2 -11  -6  131.04   62.88
  -2 -10  -6    2.65   14.98
   2 -10   6   39.01   30.51
   6 -10  -2    4.06    7.01
   2 -10   6   53.31   35.71
  -2  -9  -6   28.91   29.69
   2  -9   6   80.15   37.28
   6  -9  -2  165.20   48.78
   2  -9   6   61.44   40.56
  -2  -8  -6  246.78   86.50
   2  -8   6  239.85   70.74
   2  -8   6  272.20   63.08
   6  -8  -2  297.45   64.39
  -6  -8   2  215.62   81.50
   2  -7   6   74.35   35.77
   2  -7   6   75.10   31.05
   6  -7  -2   27.79   14.66
  -2  -7  -6   72.97   44.64
   6  -7  -2   32.92   20.61
   2  -6   6  552.37   88.65
   6  -6  -2  620.96   70.02
   2  -6   6  478.11   91.34
   2  -5   6   36.44   19.48
  -2  -5  -6   42.99   23.41
   2  -5   6   36.74   29.44
   6  -5  -2  269.84   67.98
  -2  -5  -6   42.76   30.60
   6  -5  -2  275.49   46.64
   2  -4   6  315.04   56.31
   2  -4   6  343.07   70.94
   6  -4  -2   62.57   31.96
  -2  -4  -6  213.02   49.48
  -6  -4   2  198.08   59.86
   6  -4  -2   63.86   22.76
  -2  -3  -6   50.87   21.85
   2  -3   6   60.87   28.09
  -6  -3   2  253.13   47.56
   6  -3  -2  318.12   52.75
  -6  -3   2  344.39   77.46
   6  -3  -2  337.16   71.93
   6  -2  -2  414.91   76.92
  -6  -2   2 1376.77  116.36
   2  -2   6 1001.78   97.47
   2  -2   6 1191.53  134.81
  -6  -2   2 1704.10  155.24
   6  -2  -2  421.40   62.58
  -6  -1   2  907.47  101.29
   6  -1  -2  587.30   86.80
  -6  -1   2  970.79  111.55
   2  -1   6  318.28   53.90
  -2  -1  -6   44.21   19.83
   6  -1  -2  615.70   82.03
   2  -1   6  323.58   66.28
   6   0  -2   13.01   14.80
   2   0   6  129.12   42.94
  -6   0   2   33.42   20.15
  -2   0  -6  107.66   30.23
  -6   0   2   38.72   23.98
   2   0   6  130.08   33.34
   6   0  -2   17.44   13.46
  -6   0   2   27.43   10.50
   6   1  -2  864.49   86.55
  -6   1   2  444.32   74.50
  -2   1  -6  351.09   60.55
   2   1   6   58.46   32.69
  -6   1   2  522.66   69.82
  -6   1   2  509.85   50.35
   2   2   6  992.53  131.33
  -2   2  -6 1265.74  132.85
  -2   2  -6 1054.22  103.19
   6   2  -2 1583.89  115.98
   6   2  -2 1557.46   87.97
  -2   3  -6   80.73   30.01
   2   3   6   34.76   23.36
  -2   3  -6   43.20   22.12
   6   4  -2  162.16   44.15
   2   4   6  217.19   72.38
  -6   4   2  151.11   53.42
   2   5   6   46.95   41.61
  -2   5  -6   54.04   35.50
  -2   6  -6  471.73  114.94
   2   6   6   54.33   45.46
  -6   7   2   20.41   15.71
  -2   7  -6   83.74   54.68
   2   7   6   32.76   32.64
   2   7   6   31.99   22.56
   2   8   6  273.25  107.45
  -2   8  -6  258.48   90.37
   2   8   6  216.55   66.38
  -6   8   2  417.75  108.65
   2   9   6   28.75   27.65
  -2   9  -6   97.01   57.24
   2   9   6   16.44   29.49
   2  10   6   26.15   28.39
  -6  10   2   14.39   27.97
   2  10   6   25.81   43.35
  -2  10  -6   63.34   54.83
   6  10  -2  106.45   64.09
   2  11   6  201.76  103.64
  -2  11  -6   11.36    8.87
  -6  11   2   91.30   59.46
   2  11   6  157.09   67.68
   2  12   6  136.96   66.38
  -2  12  -6  251.70  113.94
   2  12   6  115.08   85.12
   6  12  -2   83.53   55.36
  -6  12   2   63.91   54.15
   2  13   6    7.31   16.28
  -2  13  -6   41.20   50.80
   6  13  -2    2.19   11.37
   2  13   6    5.20   12.42
  -2  14  -6    3.58   18.46
   2  14   6   -4.57    7.86
   6  14  -2   13.51   29.80
  -6  14   2   58.35   51.95
   2  14   6    1.67   11.93
  -6  15   2   50.29   49.06
  -2  15  -6   27.16    8.58
   6  15  -2  215.36  110.64
   2  15   6   95.33   91.31
   2  15   6   97.57   66.23
   6  16  -2   39.58   60.20
   2  16   6   37.23   39.78
  -6  16   2   -6.90   26.50
  -2  16  -6   44.32   46.23
   2  16   6   25.90   31.12
   3 -16   6   -4.83   10.40
  -6 -16   3   35.16   39.01
  -3 -16  -6  -12.22   24.96
   3 -15   6  112.59   63.14
  -3 -15  -6   31.30   41.37
  -6 -15   3   55.10   45.87
  -3 -14  -6   38.02   42.74
  -6 -14   3   21.32   26.99
   3 -14   6   -4.33   23.94
  -6 -13   3    1.27   11.66
  -3 -13  -6   24.25   36.17
  -6 -12   3   29.76   27.77
   3 -12   6   46.16   34.53
   6 -12  -3   64.46   35.24
   3 -12   6   43.92   27.55
  -3 -12  -6  137.86   73.35
   3 -11   6  663.88  110.50
   3 -11   6  533.11  124.33
  -3 -11  -6   56.25   43.23
  -6 -11   3   25.32   21.46
   6 -11  -3   14.75   17.33
   3 -10   6   57.57   42.56
   6 -10  -3   14.53   18.09
   3 -10   6   55.62   28.99
  -6 -10   3   20.01    8.11
   3  -9   6  249.17   58.73
   3  -9   6  235.09   74.27
  -6  -9   3   19.86   30.23
  -3  -9  -6   26.07   27.47
   6  -9  -3  109.15   44.07
   3  -8   6   29.14   21.62
   6  -8  -3   28.01   17.77
   3  -8   6   41.28   22.66
  -6  -7   3  115.77   53.66
   3  -7   6  419.22   94.86
  -3  -7  -6  145.10   65.86
   3  -7   6  471.74   75.00
  -3  -6  -6   26.33   19.73
  -3  -6  -6   33.42   22.56
   3  -6   6  310.71   83.07
   3  -6   6  268.08   53.61
  -6  -6   3  217.50   70.71
   6  -5  -3  281.91   50.83
  -3  -5  -6   14.66   12.99
   3  -5   6  348.29   55.89
  -3  -5  -6   13.33   10.22
   3  -5   6  378.67   84.71
  -6  -5   3  196.97   66.38
  -3  -4  -6  964.23   96.46
   3  -4   6  667.28  107.45
   6  -4  -3   97.52   37.59
  -3  -4  -6  939.59  140.77
  -6  -4   3  577.67   75.86
  -6  -4   3  622.22  106.42
   6  -4  -3  107.84   33.82
   3  -3   6  320.76   75.51
   6  -3  -3   41.77   25.14
  -6  -3   3  569.67   68.39
   6  -3  -3   28.15   19.17
  -3  -3  -6  305.00   51.70
  -6  -3   3  678.26  105.50
   3  -2   6   52.90   29.30
  -6  -2   3   62.64   26.81
   6  -2  -3  435.56   68.54
   6  -2  -3  501.30   87.95
  -6  -2   3   47.01   27.75
   3  -2   6   47.45   24.39
  -6  -1   3   58.23   30.15
  -6  -1   3   56.16   22.22
   3  -1   6   75.30   34.72
   3  -1   6   74.63   28.04
   6   0  -3 1531.85  115.41
   3   0   6  248.58   63.96
  -6   0   3 1927.70  152.02
   3   0   6  221.86   46.70
  -6   0   3 1775.20  139.97
   3   1   6  261.08   65.97
  -6   1   3  245.97   56.08
   3   1   6  309.49   59.99
  -3   2  -6   42.15   20.67
   3   2   6   42.65   32.92
   6   2  -3   50.15   18.86
  -3   3  -6  317.78   58.06
   3   3   6  215.04   63.99
  -3   4  -6  569.02   77.73
  -3   4  -6  539.01  109.48
   3   4   6  802.14  135.71
  -3   5  -6  416.56  103.10
  -3   5  -6  359.82   61.39
  -6   5   3  314.05   83.33
  -6   6   3  214.63   73.02
   3   6   6   19.97   22.91
  -3   6  -6  229.01   82.00
   3   7   6  143.11   48.92
   3   7   6  162.74   77.98
  -6   7   3   12.79   19.75
   3   8   6  292.05  109.90
  -3   8  -6   24.78   28.42
  -6   8   3   45.59   38.33
   3   8   6  301.70   72.38
  -6   9   3  179.03   75.21
  -3   9  -6  237.05   88.85
   3   9   6   27.74   37.50
   6   9  -3   51.07   49.93
   3   9   6   39.88   33.66
   6  10  -3   29.99   28.98
   3  10   6  220.62  105.54
  -6  10   3    4.07    2.24
  -3  10  -6   35.57   38.14
   3  10   6  187.00   67.48
  -6  11   3   28.68   35.52
   6  11  -3   11.77    4.99
   3  11   6  163.43   99.50
   3  11   6  119.87   54.24
   3  12   6  131.45   61.26
  -3  12  -6   21.30   38.70
   3  12   6  181.58  100.12
   6  12  -3   39.47   33.87
  -6  12   3   87.80   66.85
  -6  13   3  113.71   70.08
   6  13  -3   -2.41   21.08
   3  13   6   41.17   57.40
  -3  13  -6  132.46   86.98
   3  13   6   70.78   46.80
   3  14   6   28.47   28.54
  -6  14   3    2.27   10.64
   3  14   6   65.80   77.08
  -3  14  -6   12.94   28.62
   6  14  -3    7.05   14.83
   3  15   6   23.20   48.92
   3  15   6   13.77   31.13
  -6  15   3   89.83   72.74
  -3  15  -6  101.83   83.25
   6  15  -3   53.56   59.16
   3  16   6  -25.77   47.79
  -3  16  -6    3.83   33.16
   6  16  -3   24.10   51.13
  -6  16   3   16.72   29.16
  -4 -16  -6   13.68   50.96
   4 -16   6  118.71   73.52
  -6 -16   4   19.82   32.97
   4 -15   6   14.22    9.23
  -4 -15  -6   85.67   55.51
  -6 -15   4   95.96   68.13
  -6 -14   4   35.64   30.26
  -4 -14  -6   17.79   20.08
   4 -14   6    9.89   14.15
  -4 -13  -6    6.79   17.67
   4 -13   6   34.84   40.28
   6 -13  -4   25.30   25.75
   4 -12   6  159.95   74.69
  -4 -12  -6   89.41   60.13
   6 -12  -4   17.69   21.39
  -6 -12   4  139.74   69.54
   6 -11  -4    9.20   11.76
   4 -11   6  151.08   49.89
   4 -11   6  125.32   64.43
  -4 -11  -6   54.57   46.25
  -6 -11   4  233.26   88.68
   6 -10  -4  143.67   54.48
   4 -10   6    8.08   11.18
   4 -10   6   25.97   23.59
  -6 -10   4    7.37   18.52
  -4 -10  -6  140.45   67.54
  -6  -9   4   55.55   39.46
   6  -9  -4  195.81   63.52
   4  -9   6  161.90   62.65
   4  -9   6  230.36   56.55
  -4  -9  -6  268.42   89.79
   4  -8   6   59.55   25.11
   4  -8   6   75.04   46.19
  -4  -8  -6   36.64   26.68
   4  -7   6  420.71   63.11
  -4  -7  -6  360.92   72.30
   4  -7   6  433.85  105.33
  -6  -7   4  285.15   82.39
  -4  -7  -6  395.40  108.58
   4  -6   6  147.20   34.31
  -6  -6   4   51.42   34.91
  -4  -6  -6  309.04   62.15
  -4  -6  -6  330.75   95.29
   4  -6   6  199.10   68.82
  -6  -5   4   73.16   37.30
  -4  -5  -6  500.83  107.06
  -4  -5  -6  551.13   74.81
   4  -5   6  397.87   91.27
  -6  -5   4   49.18   21.53
  -4  -4  -6   46.21   18.90
   6  -4  -4  153.10   49.25
  -6  -4   4  633.72   72.24
   4  -4   6   43.63   29.29
  -6  -4   4  793.20  124.97
  -4  -4  -6   43.95   30.18
   4  -3   6 1132.46  149.90
  -6  -3   4  874.04   80.53
  -6  -3   4 1038.94  128.16
   6  -3  -4  579.11   88.22
  -4  -3  -6  552.63  108.22
  -4  -3  -6  583.21   59.69
  -4  -2  -6  226.31   61.87
  -6  -2   4   67.49   25.80
   6  -2  -4   14.16   15.02
   4  -2   6  244.11   57.87
   4  -2   6  302.76   73.65
  -6  -2   4   75.65   35.64
  -6  -1   4 2007.94  172.18
   4  -1   6  240.36   58.74
  -6  -1   4 2133.05  144.29
   6  -1  -4 2390.00  160.15
   4  -1   6  255.36   63.56
  -6   0   4 1361.46  143.13
   4   0   6   63.53   34.54
   4   0   6   53.94   27.73
  -6   0   4 1088.61  103.10
   6   0  -4 1103.69   94.79
  -6   1   4 1829.30   92.85
  -6   1   4 2337.95  170.56
   4   1   6  907.70  124.87
   6   1  -4 2120.86  122.38
   4   1   6  970.81  112.30
  -4   2  -6  175.39   38.78
   4   2   6  260.82   73.50
  -6   2   4   14.09   13.02
  -4   2  -6  184.94   56.79
   6   2  -4   54.73   18.78
  -4   3  -6 1046.40  101.26
  -4   3  -6  893.23  134.55
  -4   4  -6   57.14   24.53
  -4   4  -6   26.92   28.34
   4   4   6   44.78   27.52
  -4   5  -6  298.99   84.16
   4   5   6  469.15  110.00
  -4   5  -6  342.32   56.67
  -4   6  -6  129.60   59.60
  -4   6  -6  141.46   40.22
  -6   6   4   45.20   36.62
   4   7   6  423.38   75.75
  -4   7  -6  444.72  115.63
   4   7   6  436.42  129.37
  -4   7  -6  437.31   81.96
   4   8   6   44.27   28.31
  -6   8   4  107.46   60.65
   4   8   6   40.71   39.81
  -4   8  -6   34.68   35.38
   4   9   6  294.52  118.06
  -4   9  -6  190.91   84.72
  -6   9   4  212.29   84.11
   4   9   6  265.35   72.05
   4  10   6  182.78   88.21
  -6  10   4  221.85   86.10
  -4  10  -6    5.94   11.02
   6  10  -4    8.50   15.84
   4  10   6  168.87   60.16
   4  11   6   57.98   52.39
  -6  11   4    4.29    7.63
   4  11   6   50.92   37.55
  -6  12   4   10.30   16.26
   6  12  -4  179.68   88.12
   4  12   6   96.91   78.06
  -4  12  -6  147.07   84.91
   4  12   6   97.68   52.29
   4  13   6   16.24   27.38
   4  13   6   10.79   36.16
  -6  13   4   26.88   35.19
  -4  13  -6   20.06   45.56
   6  13  -4  142.77   84.16
  -6  14   4  141.98   83.96
   4  14   6   41.76   68.05
   4  14   6   13.40   17.24
  -4  14  -6   -9.13   28.22
   6  14  -4   46.81   55.69
  -4  15  -6   14.09   13.22
   4  15   6   93.03   97.77
   6  15  -4   88.30   71.16
  -6  15   4    6.14   31.45
  -6  16   4  -27.35   39.75
   4  16   6   33.85   46.72
   6  16  -4   -6.36   11.03
  -6 -16   5   87.11   63.63
   5 -16   6   -1.40   23.95
  -5 -16  -6   40.70   54.50
  -5 -15  -6  -23.35   39.60
   5 -15   6  -15.73   25.69
  -6 -15   5   23.95   29.52
  -6 -14   5   43.87   34.18
   5 -14   6  164.94   78.31
  -5 -14  -6   99.72   65.82
  -5 -13  -6   73.04   58.11
   6 -13  -5  141.51   63.00
   5 -13   6   20.68   22.70
  -6 -13   5   25.55   32.02
  -5 -12  -6    3.59   20.88
  -6 -12   5  151.26   68.03
   5 -12   6   70.36   51.46
   6 -12  -5   78.33   44.71
  -6 -11   5   24.49   21.12
   5 -11   6   33.03   31.63
   6 -11  -5   39.37   28.10
  -5 -11  -6   56.00   47.42
   5 -10   6  123.60   65.70
  -5 -10  -6  294.37  100.25
   6 -10  -5  110.00   50.40
  -6 -10   5  231.40   84.04
  -6  -9   5   10.11   18.04
   5  -9   6   26.51   16.24
   5  -9   6    8.97   15.77
   5  -8   6  427.49  112.95
  -6  -8   5  353.31   93.31
   5  -8   6  327.06   49.51
  -6  -7   5   93.23   48.12
   5  -7   6   75.81   48.75
  -5  -7  -6  142.47   42.34
  -5  -7  -6  144.72   65.32
   5  -6   6   76.68   46.06
  -5  -6  -6  331.53   96.54
  -6  -6   5  131.44   55.42
  -5  -6  -6  261.39   49.78
  -5  -5  -6  408.91  104.68
  -5  -5  -6  313.23   47.84
  -6  -5   5  103.66   44.58
   5  -5   6  487.89  108.99
  -6  -5   5   72.29   23.44
  -5  -4  -6  278.19   37.24
  -6  -4   5  497.17   56.57
  -5  -4  -6  343.04   89.03
   5  -4   6  575.31  114.26
  -6  -4   5  669.32  113.42
  -6  -3   5  528.64  102.95
  -5  -3  -6  370.93   38.77
  -6  -3   5  477.96   63.05
   6  -3  -5  103.16   36.19
   5  -3   6    8.13    6.39
  -5  -3  -6  358.25   88.27
   5  -2   6   53.13   31.38
  -6  -2   5  111.13   43.76
  -6  -2   5  123.55   31.72
   5  -2   6   45.55   29.82
  -5  -2  -6   43.65   13.41
  -5  -2  -6   37.03   23.38
  -6  -1   5  151.29   33.70
  -6  -1   5  170.11   53.77
  -5  -1  -6  123.81   28.64
   5  -1   6  216.90   57.96
  -5  -1  -6  148.11   50.19
   5  -1   6  211.95   59.93
   5   0   6  892.38  131.08
  -6   0   5  984.76  126.16
   6   0  -5  780.32   71.80
  -5   0  -6  672.84   81.23
   5   0   6  828.42  114.30
  -6   1   5  482.70   85.56
  -5   1  -6  206.48   49.22
   5   1   6  111.45   44.02
   6   1  -5  139.45   26.88
   5   1   6  150.04   47.11
  -6   1   5  375.95   36.69
  -6   2   5  333.00   56.75
  -6   2   5  264.58   59.23
  -5   2  -6   29.05   21.81
   5   2   6   21.38   17.60
  -5   2  -6   32.43   15.11
   5   2   6   19.99   17.68
   5   3   6  300.36   86.03
  -5   3  -6   14.73    9.18
  -5   3  -6   14.25   10.92
   6   3  -5  415.39   40.53
  -5   4  -6  476.63   62.40
   5   4   6  284.89   82.22
  -5   4  -6  510.52  100.20
  -5   5  -6  356.24   90.54
   5   5   6  395.93  103.25
  -5   5  -6  329.59   51.81
  -5   6  -6   68.45   23.53
  -5   6  -6   65.41   47.66
  -5   7  -6   49.85   39.77
  -5   7  -6   22.16   17.27
   5   8   6   -1.11    4.73
   5   8   6   -4.86   17.52
  -5   9  -6   30.03   36.36
  -6   9   5  203.87   85.78
   5   9   6  387.40  131.73
   5   9   6  391.26   81.99
   5  10   6  459.12  151.81
  -6  10   5  152.95   77.48
  -5  10  -6   73.78   59.23
   5  10   6  421.25   92.26
   5  11   6   62.48   36.53
  -6  11   5   53.08   46.91
  -5  11  -6   37.54   40.75
   5  11   6   75.26   70.36
   6  11  -5    5.54   32.03
   5  12   6    5.52   14.91
  -5  12  -6   60.13   58.28
  -6  12   5  104.33   65.16
   5  12   6   17.87   25.78
  -6  13   5  160.94   92.73
   5  13   6  129.14   95.39
  -5  13  -6   18.76   23.23
   6  13  -5   36.96   51.54
   5  14   6  223.38  121.32
   6  14  -5   46.03   43.46
  -6  14   5    2.53   23.27
  -5  14  -6  237.14  120.36
  -6  15   5   72.77   64.55
   5  15   6    2.46   23.24
   6  15  -5   42.65   55.74
  -5  15  -6  -10.95   33.81
   5  16   6   37.67   68.20
   6  16  -5   66.80   55.41
  -5  16  -6   16.00   36.04
  -6  16   5    0.18   26.40
  -6 -15   6  131.86   73.59
   6 -15   6   36.46   38.56
  -6 -15  -6   74.21   60.81
   6 -14   6   41.16   30.15
  -6 -14   6    7.91    9.80
  -6 -14  -6   -6.00   25.15
  -6 -13   6   -9.34   24.50
   6 -13  -6    8.35   19.40
   6 -13   6   22.55   31.77
  -6 -13  -6    2.26   18.88
  -6 -12   6  103.42   57.86
  -6 -12  -6   72.92   58.53
   6 -12   6  191.75   84.26
   6 -12  -6  130.32   62.12
   6 -11   6   30.47   33.68
   6 -11  -6   15.34    7.72
  -6 -10   6   17.06   22.52
   6 -10  -6   76.14   43.92
   6 -10   6   68.00   47.40
  -6 -10  -6   10.31   19.85
  -6  -9   6   32.86   30.39
   6  -9   6  102.57   61.00
  -6  -9  -6   22.79   30.84
  -6  -8  -6   37.51   30.75
  -6  -8   6   30.01   23.07
   6  -7   6   41.32   34.74
  -6  -7  -6  161.66   65.88
  -6  -7   6  209.71   68.77
   6  -6   6  226.30   77.98
  -6  -6   6  164.89   36.25
  -6  -6  -6  120.15   56.68
  -6  -6   6  169.93   61.39
  -6  -5  -6   57.44   35.51
  -6  -5   6   66.29   20.21
  -6  -5   6   99.06   48.42
  -6  -4   6  206.16   67.32
  -6  -4   6  133.37   27.49
  -6  -4  -6  126.24   54.44
   6  -3  -6   29.28   19.29
   6  -3   6   15.96   21.29
  -6  -3  -6  244.16   76.25
  -6  -3   6  253.67   38.65
  -6  -3   6  280.25   74.61
  -6  -2   6  511.16  100.50
  -6  -2  -6  390.86   87.70
   6  -2   6   70.67   39.84
  -6  -2   6  419.50   47.87
   6  -2  -6   57.45   22.61
   6  -2   6   60.44   34.41
  -6  -1   6  194.91   62.63
  -6  -1  -6  131.81   47.44
  -6  -1  -6  108.89   21.22
   6  -1  -6  260.01   47.82
   6  -1   6  289.34   74.43
   6  -1   6  279.47   69.86
  -6   0  -6   94.34   27.17
  -6   0   6   99.74   41.35
   6   0   6   77.34   40.89
   6   0  -6   99.69   23.24
  -6   0  -6   87.87   37.66
   6   0   6   97.47   42.52
  -6   1   6  286.05   37.01
  -6   1  -6  241.03   50.84
  -6   1   6  262.67   64.07
   6   1  -6  124.28   22.57
   6   1   6  148.77   47.64
  -6   1  -6  221.07   55.94
   6   1   6  131.85   49.04
   6   2   6  390.37   91.73
  -6   2   6   57.24   25.74
  -6   2  -6   48.72   26.71
  -6   2  -6   51.71   22.69
   6   2   6  434.51   90.99
  -6   2   6   51.46   26.69
   6   3  -6  231.76   33.27
  -6   3  -6   28.48   15.24
  -6   3  -6   30.99   17.94
   6   3   6  187.52   70.73
  -6   3   6   19.37   18.55
   6   4   6  155.09   62.92
  -6   4  -6  250.62   41.38
  -6   4   6  297.68   72.40
  -6   4  -6  305.20   78.70
   6   4  -6  184.11   36.77
  -6   5  -6  321.15   88.44
  -6   5  -6  204.06   36.15
  -6   6  -6  140.11   63.17
  -6   6  -6   64.53   21.40
   6   6   6  177.49   73.53
  -6   7  -6   22.60   28.27
  -6   7  -6   12.88   12.47
   6   8   6   10.24   21.74
   6   8   6   20.72   16.89
   6   9   6   30.37   18.12
  -6   9  -6  102.08   58.54
   6   9   6   43.28   48.84
  -6   9   6   90.02   57.03
   6  10   6   15.97   15.47
  -6  10  -6   52.91   58.26
   6  10   6   15.17   29.50
  -6  10   6   60.24   48.20
  -6  11  -6   35.22   42.16
   6  11   6  243.10  113.80
   6  11  -6  268.20  125.39
  -6  11   6   24.00   27.98
  -6  12  -6  179.70   97.33
   6  12   6  120.64   84.38
   6  12  -6  137.02   82.91
  -6  12   6  188.07   90.73
  -6  13  -6   11.48   27.08
   6  13   6    7.68   24.96
   6  13  -6    2.16   18.83
  -6  13   6   20.93   26.62
  -6  14   6   43.53   55.75
   6  14  -6   -8.62   39.69
  -6  14  -6   39.50   45.69
   6  14   6   -6.90   33.96
   6  15  -6  130.24   91.34
  -6  15  -6    6.90    9.39
  -6  15   6   19.04   13.69
   6  15   6  145.19  113.49
   7 -15   6   82.22   57.80
  -7 -15  -6  -18.68   41.08
  -6 -15   7   41.04   41.92
  -6 -14   7   87.23   54.36
  -7 -14  -6   25.72   37.65
   7 -14   6   46.06   46.51
  -6 -13   7  101.22   55.95
   7 -13   6   39.64   38.45
  -7 -13  -6   53.16   48.90
   6 -13  -7    6.45    4.01
   7 -12   6   23.44   30.08
  -6 -12   7   53.52   41.26
   6 -12  -7   46.12   37.55
  -7 -12  -6   63.53   52.62
   6 -11  -7  183.97   79.44
   7 -11   6  242.62  104.20
  -6 -11   7    6.14   26.18
  -7 -11  -6  148.65   76.88
  -7 -10  -6   55.38   33.76
   7 -10   6   48.18   34.20
   6 -10  -7   83.50   46.90
   7  -9   6   82.80   58.75
  -7  -9  -6  274.71  101.41
  -6  -8   7   91.14   50.49
   7  -8   6   15.44   26.22
  -6  -7   7   37.11   31.47
   7  -7   6  298.19   95.16
  -7  -7  -6  197.27   76.42
   7  -6   6  238.05   85.67
  -6  -6   7  264.50   40.87
  -6  -6   7  358.29   99.38
  -6  -5   7  704.39  134.88
  -6  -5   7  545.67   54.02
   7  -5   6  196.45   73.97
  -7  -5  -6   43.63   33.38
  -6  -4   7   37.40   30.93
   7  -4   6  572.87  132.88
  -6  -4   7   28.99   12.81
  -7  -4  -6  374.51   92.51
   6  -3  -7  136.13   40.58
  -6  -3   7  142.18   54.14
   7  -3   6  141.70   58.90
  -6  -2   7  763.87  137.39
   6  -2  -7  564.80   75.21
   7  -2   6   25.90   19.10
  -7  -2  -6   69.32   36.34
  -6  -1   7  264.66   71.17
   7  -1   6  603.88  110.72
   6  -1  -7   82.50   24.96
   7  -1   6  561.91  104.99
  -7  -1  -6  124.35   48.26
   7   0   6  488.37   99.79
  -7   0  -6  560.85   61.59
  -7   0  -6  454.64   87.97
  -6   0   7  144.73   52.54
   6   0  -7  132.41   24.02
   7   0   6  597.39  110.70
  -6   1   7   81.36   22.35
  -6   1   7   55.21   29.58
   7   1   6  155.29   52.74
   7   1   6  173.98   62.13
   6   2  -7  402.11   50.59
  -6   2   7  513.24   68.01
  -7   2  -6   71.13   33.18
  -7   2  -6   55.21   24.37
   7   2   6   67.28   34.96
   7   2   6   79.77   37.93
  -7   3  -6   87.84   24.01
   6   3  -7  101.41   26.44
  -7   3  -6  116.69   36.29
  -7   3  -6  162.17   53.84
  -6   3   7  174.91   50.53
  -7   4  -6  210.92   38.29
  -7   4  -6  376.04   91.46
   7   4   6  386.66  101.13
   6   4  -7   44.23   21.18
  -7   4  -6  289.13   48.70
  -6   4   7   18.61   22.37
  -7   5  -6  115.47   27.18
   7   5   6   62.69   43.86
  -7   5  -6  183.36   67.24
  -6   5   7   98.26   49.26
  -7   5  -6   61.02   16.78
  -7   6  -6  216.66   78.29
  -6   6   7  305.44   91.50
   7   6   6   19.10   22.55
  -7   6  -6   99.33   22.32
  -7   6  -6   54.19   15.88
   7   7   6  245.49   95.61
  -7   7  -6  279.13   94.63
   7   8   6  405.76  123.05
  -7   8  -6   18.21   33.63
  -7   9  -6   48.12   52.02
   7   9   6  365.12  124.95
  -7  10  -6   28.69   40.75
   7  10   6   76.66   59.02
   7  11   6  257.94  118.48
  -7  11  -6  241.93  123.08
   6  12  -7  109.06   85.81
   7  12   6   95.12   73.44
  -7  12  -6   14.60   14.74
  -6  12   7   54.32   60.08
   6  13  -7  161.40  102.05
   7  13   6  105.95   71.39
  -7  13  -6   15.18   11.71
  -6  13   7   10.55   23.89
   6  14  -7  106.13   77.90
  -7  14  -6   37.62   53.44
   7  14   6    0.42   25.15
  -6  14   7   34.95   45.94
  -7  15  -6   99.21   79.24
   6  15  -7  111.14   86.99
   7  15   6    3.58   33.03
  -6  15   7    5.64   19.43
  -5 -15   7   -4.12   20.38
   5 -15  -7   47.12   41.65
   7 -15   5   21.39   33.79
  -7 -15  -5   83.48   72.21
   5 -14  -7    1.48    3.86
  -7 -14  -5    9.79   27.94
   5 -13  -7   37.79   40.52
  -5 -13   7   44.15   33.48
   7 -13   5   18.66   26.29
  -7 -13  -5   19.07   34.32
   5 -12  -7   66.87   50.71
  -5 -12   7   83.54   49.16
  -7 -12  -5   47.25   46.15
   7 -12   5    7.06   15.75
  -5 -11   7   47.57   33.07
  -7 -11  -5  110.58   59.86
   7 -11   5   43.03   42.03
   7 -10   5  121.82   66.51
  -5 -10   7   93.43   50.42
  -7 -10  -5   73.71   56.87
   5 -10  -7   13.09   22.53
  -5  -9   7   12.64   16.20
  -7  -9  -5   42.43   34.95
   7  -8   5  160.77   76.41
  -5  -8   7   14.60    5.76
  -7  -8  -5  178.38   74.34
  -5  -7   7   39.53   31.05
   7  -7   5   56.51   39.90
  -7  -7  -5   44.81   33.89
  -5  -6   7  119.38   51.92
  -5  -6   7  100.29   27.25
   7  -6   5   65.73   44.69
  -7  -6  -5   77.14   47.10
  -5  -5   7  228.23   70.78
  -5  -5   7  140.76   25.46
  -7  -5  -5  104.10   50.37
  -5  -4   7  196.53   27.22
  -7  -4  -5  286.02   81.23
  -5  -4   7  236.45   72.02
  -5  -3   7   38.55   32.38
   7  -3   5  122.25   57.17
  -7  -2  -5   78.81   38.11
   7  -2   5  239.99   68.50
  -5  -1   7  384.19   84.35
   5  -1  -7   47.95   17.37
  -7  -1  -5   56.59   29.01
   7  -1   5  378.62   81.28
   7  -1   5  410.94   90.74
  -5   0   7  131.14   48.21
   5   0  -7   92.95   17.88
   7   0   5  454.31   94.88
  -7   0  -5  301.09   64.47
   7   0   5  420.20   88.89
  -7   0  -5  449.04   50.75
  -5   0   7  128.00   28.15
  -7   1  -5  406.57   63.74
  -5   1   7   22.80   19.79
   7   1   5   61.35   36.50
  -5   1   7   26.13   14.66
  -7   1  -5  257.03   56.07
   7   1   5   50.09   29.03
   5   1  -7  371.08   57.28
   5   2  -7  276.93   44.12
  -7   2  -5  169.04   40.13
  -7   2  -5  267.86   59.31
   7   2   5   62.86   34.72
   7   2   5   57.66   30.77
   5   3  -7   14.83   12.07
  -7   3  -5   52.14   19.70
  -7   3  -5   89.46   40.09
   7   3   5  282.97   81.42
   7   3   5  340.45   80.78
  -5   3   7  308.06   70.33
  -7   3  -5   45.70   14.38
  -7   4  -5  470.75  103.46
  -5   4   7   59.51   32.91
   5   4  -7  208.56   45.95
   7   4   5  359.07   92.47
  -7   4  -5  233.57   32.08
  -7   4  -5  210.95   29.56
  -7   5  -5  359.03   99.09
  -5   5   7  192.42   68.53
   5   5  -7  203.97   53.42
   7   5   5  130.77   56.18
  -7   6  -5   82.19   53.66
   7   6   5   86.17   52.83
   7   7   5   44.03   18.67
   7   7   5   35.91   27.34
  -7   7  -5   67.09   55.16
   7   8   5  220.59   49.05
   7   8   5  188.89   86.26
  -7   8  -5   95.31   61.21
   7   9   5   33.42   37.17
   7   9   5   49.42   26.49
  -7  10  -5  129.89   80.82
   7  10   5   91.83   65.61
  -7  11  -5   25.00   10.77
   7  11   5  124.70   79.66
   5  11  -7   35.80   44.11
   5  12  -7  121.47   80.28
  -7  12  -5    6.48   24.07
   7  12   5  102.49   77.88
  -5  12   7   60.83   54.73
   5  13  -7   77.06   71.07
   7  13   5   -4.62   18.58
  -7  13  -5   26.95   29.31
  -5  13   7   31.42   42.64
  -5  14   7    6.74   20.04
   5  14  -7   90.48   74.12
   7  14   5    5.34   27.71
  -7  15  -5   -2.74   14.13
   5  15  -7  -17.24   17.00
  -5  15   7   17.23   15.37
  -4 -15   7   17.25   28.84
  -7 -15  -4   40.93   58.14
   7 -15   4   17.19   29.11
   4 -15  -7   66.49   46.32
  -4 -14   7   39.21   39.20
   7 -14   4  -15.93   28.70
   4 -14  -7   27.18   23.77
  -7 -14  -4   96.26   74.08
  -4 -13   7  131.94   64.41
   7 -13   4   20.91   34.89
  -7 -13  -4  -12.59   41.32
   4 -13  -7   28.46   32.31
  -4 -12   7    9.47    4.06
   7 -12   4   53.41   45.63
   4 -12  -7   65.83   47.17
  -7 -11  -4   54.61   46.96
   7 -11   4   11.34   25.30
   4 -11  -7   12.31   14.36
  -4 -11   7   17.11   27.50
  -4 -10   7   95.26   50.67
   4 -10  -7   20.61   25.74
   7 -10   4   47.38   32.62
  -7 -10  -4   56.13   47.46
  -4  -9   7   61.83   39.71
   7  -9   4    7.77   24.65
  -7  -9  -4    8.56   20.66
  -4  -8   7   86.83   42.99
   7  -8   4   68.96   50.36
  -4  -7   7  178.82   68.45
   7  -7   4  145.63   73.23
  -7  -7  -4   99.69   52.43
  -4  -6   7   13.73   11.69
  -7  -6  -4   42.21   33.39
  -4  -5   7   62.45   34.89
   7  -5   4    9.98    3.00
  -4  -4   7  189.74   60.63
  -7  -4  -4  341.85   87.02
  -4  -3   7  451.37   98.26
  -7  -3  -4    5.22    9.24
  -4  -2   7  189.46   58.90
  -7  -2  -4  145.16   50.16
   7  -2   4  717.86  108.21
   7  -2   4  767.26  121.26
   7  -1   4   11.23   15.31
   7  -1   4   11.62    9.19
   7  -1   4    9.64   15.90
  -4   0   7   83.85   35.64
  -4   0   7   94.96   29.06
   7   0   4  197.85   60.25
  -7   0  -4  151.86   42.57
  -7   0  -4  226.88   36.31
   4   0  -7   74.48   31.61
   7   0   4  184.77   53.89
   7   1   4  532.02   96.23
  -4   1   7  973.12  118.12
  -7   1  -4   10.35   10.10
   4   1  -7  608.26   78.42
   7   1   4  464.27   86.65
  -4   1   7 1028.87   99.68
  -7   1  -4   15.67   11.33
  -4   2   7  361.59   63.58
   7   2   4  205.86   60.03
   4   2  -7  181.56   43.35
   7   2   4  170.34   53.64
   4   3  -7  217.99   47.04
   7   3   4    0.59   11.35
  -4   3   7  131.90   45.36
   7   3   4    2.25    7.43
   7   4   4  309.20   81.50
   4   4  -7  182.38   44.74
  -4   4   7  185.12   61.45
   7   5   4  128.83   58.03
  -4   5   7  222.20   76.38
  -7   5  -4    4.97   10.97
   7   6   4   35.86   29.66
  -4   6   7   38.22   42.29
   7   6   4   58.50   18.61
  -7   7  -4  111.54   65.42
  -4   7   7   -0.87   15.24
   7   7   4  109.58   62.45
   7   7   4  162.16   40.21
  -4   8   7  134.41   75.73
   7   8   4  537.42   87.23
  -7   8  -4   70.40   55.85
   7   8   4  441.56  130.05
   7   9   4   18.75   18.61
  -7   9  -4   10.59   18.54
   7   9   4   18.92   32.31
   7  10   4   94.71   45.80
  -7  10  -4   41.25   44.68
  -4  10   7    8.30   26.99
   7  10   4   89.03   59.02
   7  11   4   61.89   44.64
  -4  11   7   23.08   35.78
  -7  11  -4    2.24   12.99
   7  11   4   66.93   53.28
   4  11  -7   55.99   58.39
  -7  12  -4   46.45   50.01
   4  12  -7  -27.76   53.28
  -4  12   7  112.89   70.07
   7  13   4    7.02   32.59
  -7  13  -4   14.03   28.96
  -4  13   7   32.35   33.31
   7  14   4   54.88   56.85
  -4  14   7   23.88   31.16
  -7  14  -4   15.45   39.83
   4  14  -7   20.86   42.55
  -7  15  -4    4.96   15.42
   4  15  -7   54.09   69.72
   7  15   4   30.67   47.60
  -4  15   7   55.12   45.31
  -3 -16   7    3.19   15.65
   3 -16  -7   19.46   33.27
   7 -16   3   44.67   42.90
  -7 -16  -3   11.51    8.83
   7 -15   3    4.74   13.38
   3 -15  -7   14.10   11.92
  -3 -15   7   -6.40   25.95
  -3 -14   7  171.26   71.67
   3 -14  -7   33.03   41.29
   7 -14   3  155.64   82.65
  -7 -14  -3   29.82   47.83
  -3 -13   7  108.87   58.61
   7 -13   3  109.19   64.05
  -7 -13  -3    5.59   20.63
   3 -13  -7   99.77   59.48
   3 -12  -7   49.75   39.16
  -3 -12   7   10.22   20.57
   7 -12   3  100.83   64.61
  -7 -12  -3   72.81   62.12
   7 -11   3   58.83   42.72
   3 -11  -7  124.23   65.89
  -3 -11   7   15.64   21.67
  -7 -10  -3   79.93   56.96
   7 -10   3  318.51   98.03
   3 -10  -7   16.17   15.91
  -3 -10   7  233.81   78.01
   3  -9  -7  111.61   56.21
  -7  -9  -3    2.04   10.58
   7  -9   3  177.42   78.02
  -7  -8  -3  109.38   60.91
   7  -8   3  262.48   87.00
  -3  -8   7  222.55   75.05
  -3  -7   7   74.90   42.07
   7  -7   3  225.56   83.35
  -7  -7  -3  225.78   85.18
  -3  -6   7  178.06   61.40
  -7  -6  -3    4.59    5.44
   7  -6   3  119.61   61.10
  -3  -5   7  292.78   74.80
  -7  -5  -3   17.48   20.57
  -3  -4   7  162.13   55.16
  -3  -4   7  182.11   30.79
  -3  -3   7  311.13   80.42
  -7  -3  -3  288.58   75.82
   7  -3   3   80.52   40.26
   7  -2   3   98.34   36.69
   7  -2   3  144.93   54.68
  -7  -2  -3   65.80   32.72
  -3  -1   7  379.81   61.50
   3  -1  -7  181.69   53.22
  -7  -1  -3  143.60   44.91
   7  -1   3  455.42   70.23
   7  -1   3  547.93   97.96
  -3  -1   7  355.99   76.18
   7  -1   3  604.23   98.82
  -3   0   7  206.08   47.08
   7   0   3  889.57  106.70
  -3   0   7  178.01   50.61
   7   0   3  918.90  121.70
  -7   0  -3  793.98  101.28
   3   0  -7  207.27   54.67
   7   0   3  930.91  113.83
   7   0   3  811.75   82.73
  -3   1   7  157.56   42.31
   7   1   3  127.22   24.78
   7   1   3  212.66   59.44
   3   1  -7  221.70   48.11
   7   1   3  212.62   57.58
  -7   2  -3   87.62   31.58
  -3   2   7  161.71   44.66
  -7   2  -3   53.01   20.96
   7   2   3  105.77   39.05
   7   2   3  116.11   41.81
   7   3   3  394.59   85.93
  -3   3   7  228.01   61.28
   7   3   3  415.32   84.35
  -7   3  -3   97.37   39.50
   3   3  -7  250.73   56.84
  -7   3  -3    9.16    5.67
  -7   4  -3  377.34   84.72
   7   4   3  680.16  112.85
   7   4   3  668.33   50.60
  -3   4   7  304.28   78.80
   7   5   3   20.65   12.02
   7   5   3   18.43   25.30
  -3   5   7   22.84   24.05
   7   6   3    7.29    9.50
   7   6   3    5.56    8.23
  -3   6   7   94.02   55.33
  -7   6  -3  112.01   54.87
   7   7   3  246.15   58.36
  -7   7  -3  273.72   87.33
   7   7   3  234.27   87.91
  -3   7   7  117.86   63.83
  -3   8   7   20.41   31.44
   7   8   3  158.27   54.75
   7   8   3  142.07   72.69
  -7   8  -3  276.46   97.80
  -3   9   7  117.67   69.38
   7   9   3    5.12   13.83
  -7   9  -3  160.72   77.48
   7   9   3   13.12   27.84
   7  10   3  102.36   53.25
   7  10   3   95.59   50.80
   3  10  -7  201.26  101.49
  -3  10   7   35.67   41.64
  -3  10   7   26.73   26.55
   7  11   3  315.25  124.80
   7  11   3  321.49  100.84
  -7  11  -3   91.94   59.98
   3  11  -7   20.14   36.61
  -3  11   7  150.12   73.43
   3  12  -7   31.76   44.10
   7  12   3   79.16   50.81
  -7  12  -3   72.79   60.45
   7  12   3  129.64   64.44
  -3  12   7   36.86   37.20
  -3  13   7  154.20   79.05
  -7  13  -3  112.14   79.19
   3  13  -7  122.54   78.47
   7  13   3  -12.19   35.93
  -7  14  -3  159.73   91.17
   7  14   3   35.89   49.17
  -3  14   7   35.58   50.26
   3  14  -7  124.20   85.72
  -3  15   7   27.53   27.09
  -7  15  -3   20.71   33.26
   3  15  -7    6.09   24.24
  -7  16  -3   12.57    6.79
  -3  16   7    9.73   25.01
   3  16  -7  -12.90   40.95
   7  16   3   12.84   19.92
   7 -16   2   27.26   38.43
   2 -16  -7   46.71   52.29
  -2 -16   7   38.09   42.40
  -7 -16  -2   27.68   51.30
  -2 -15   7   23.45   26.93
  -7 -15  -2   -9.25   35.47
   2 -15  -7   20.89   32.78
   7 -14   2    2.22   23.04
   2 -14  -7   65.25   47.14
  -7 -14  -2   55.43   56.19
  -2 -13   7  145.01   64.20
   2 -13  -7   17.42    7.95
  -7 -13  -2  108.88   74.46
   7 -13   2   81.03   57.49
  -2 -12   7   82.78   47.97
   7 -12   2   32.85   32.83
   2 -12  -7   89.39   57.73
  -7 -12  -2   44.53   48.54
   2 -11  -7   87.81   51.43
  -2 -11   7   55.47   33.05
   7 -11   2  193.73   79.74
  -7 -11  -2   91.12   67.14
   7 -10   2   29.44   30.08
  -7 -10  -2   62.32   49.78
   7  -9   2  114.16   56.93
  -7  -9  -2  535.11  147.81
  -2  -9   7  593.71  120.29
   2  -9  -7  111.89   53.41
  -2  -8   7  227.13   72.60
   7  -8   2   79.25   44.69
  -2  -7   7   93.69   46.57
  -7  -7  -2  338.93  110.96
   7  -7   2  412.94  106.20
  -2  -6   7  584.10  107.26
   7  -6   2  317.51   94.18
  -2  -5   7  964.61  132.20
  -2  -5   7  859.30   82.71
   7  -5   2  341.86   96.32
  -7  -5  -2  103.86   58.04
  -2  -4   7  575.54  110.50
  -2  -4   7  491.28   54.55
   7  -4   2  387.95   93.77
  -7  -4  -2  400.65  101.90
  -2  -3   7  204.90   56.64
  -2  -3   7  143.97   19.31
   7  -2   2  152.26   47.75
  -7  -2  -2  254.59   71.34
   7  -2   2  161.98   60.25
   7  -2   2  131.71   28.78
  -2  -2   7  126.92   45.28
   7  -1   2  974.23  115.39
   7  -1   2  825.42  113.91
  -2  -1   7  598.54   94.07
   2  -1  -7   14.84   14.19
   7  -1   2  808.03   88.34
  -7  -1  -2  237.65   62.89
  -2  -1   7  676.85   84.40
  -2   0   7  557.65   81.09
   7   0   2  550.62   71.42
   2   0  -7  398.34   34.95
   7   0   2  523.99   87.44
   2   0  -7  459.77   80.67
   7   0   2  540.87   81.56
   7   0   2  537.95   79.80
  -7   0  -2  561.74   85.36
   7   1   2  276.41   61.39
   2   1  -7  686.71   96.76
  -7   1  -2  757.14   84.27
   7   1   2  233.96   60.92
   7   1   2  273.09   67.04
   7   1   2  271.20   42.88
  -7   1  -2  886.50   95.21
  -2   1   7   42.48   22.82
   2   2  -7  141.44   42.47
   7   2   2  174.95   47.16
  -7   2  -2  228.27   52.96
  -2   2   7  103.07   39.35
   7   2   2  190.15   52.52
  -7   2  -2  184.55   31.04
   7   2   2  196.93   32.35
   7   3   2  324.67   72.78
  -2   3   7  638.71  105.78
   7   3   2  359.26   73.66
  -7   3  -2  587.80   93.56
   7   4   2  283.31   71.40
  -2   4   7  183.69   65.13
  -7   4  -2  301.68   72.39
   7   5   2  105.93   35.49
   7   5   2   85.31   45.53
   7   6   2   45.70   37.87
   7   6   2   46.16   23.33
   7   7   2  448.61   82.10
  -2   7   7  569.83  137.63
  -7   7  -2  427.66  107.68
   7   7   2  420.94  112.55
   7   8   2  651.58  151.41
   7   8   2  714.83  117.19
  -7   8  -2  121.62   62.05
  -2   8   7  237.63   96.48
   7   9   2  568.24  112.21
  -2   9   7  126.15   76.29
  -7   9  -2  150.20   78.36
   2   9  -7  701.54  184.70
   7   9   2  536.83  145.49
  -2   9   7  153.40   67.65
  -7  10  -2   49.42   45.02
   7  10   2   45.25   54.69
   7  10   2   52.58   35.26
   2  10  -7  490.76  151.47
  -2  10   7  348.05  127.81
  -2  10   7  372.36  109.69
  -2  11   7  165.96   96.57
   7  11   2   94.68   61.27
  -7  11  -2  190.18   93.42
   7  11   2   89.40   56.31
   2  11  -7   38.13   35.02
  -2  11   7  107.69   65.48
  -7  12  -2   22.60   39.80
   2  12  -7  106.38   72.43
  -2  12   7  122.20   70.74
   7  12   2   29.88   36.17
  -2  12   7  113.03   80.14
   7  12   2   48.91   41.21
   7  13   2  132.97   80.01
  -2  13   7   24.03   29.74
   7  13   2  162.34   82.80
  -7  13  -2  124.72   79.82
  -2  13   7   72.23   75.24
   2  13  -7  189.90  101.26
   2  14  -7  188.52  103.48
  -7  14  -2   20.73   34.45
   7  14   2   78.32   70.27
  -2  14   7   83.87   75.93
  -2  14   7   90.15   62.92
   7  15   2   51.86   58.91
  -2  15   7   13.61   13.60
  -2  15   7   12.03   30.43
   2  15  -7    5.61    8.65
  -2  16   7    8.27   19.63
   7  16   2   37.05   46.83
  -7  16  -2   32.22   41.09
  -2  16   7   62.10   69.98
   2  16  -7   30.29   48.34
   1 -16  -7   12.63   24.76
  -1 -16   7   -2.84   19.23
   7 -16   1   40.02   46.30
  -7 -16  -1   19.75   12.65
  -1 -15   7   34.03   28.16
   1 -15  -7    4.72   11.24
   7 -15   1    0.43    8.62
  -7 -15  -1   36.67   48.91
  -1 -14   7   36.41   31.49
   7 -14   1   18.76   20.81
   1 -14  -7  -16.24   34.00
  -7 -13  -1   77.82   57.73
   1 -13  -7  128.76   68.15
   7 -13   1   35.31   26.72
  -1 -13   7   67.82   42.79
   1 -12  -7   60.06   40.77
  -1 -12   7   88.08   48.77
   7 -12   1   15.20   14.40
  -7 -12  -1   13.39   34.86
  -1 -11   7   32.76   30.80
   7 -11   1  120.31   64.84
   1 -11  -7  108.04   62.17
  -7 -11  -1    0.70   24.35
  -1 -10   7  139.86   59.25
   7 -10   1   59.95   44.44
  -7 -10  -1  158.69   86.26
   1 -10  -7   21.37   25.60
   7  -9   1    5.88    4.97
  -1  -9   7   65.35   35.65
   1  -9  -7  206.36   81.12
   7  -9   1   70.37   43.56
  -7  -9  -1  187.39   85.27
  -1  -8   7  182.35   63.46
   1  -8  -7  221.61   83.29
   7  -8   1  273.94   83.30
  -7  -8  -1   71.71   54.21
  -1  -7   7   26.22   23.37
  -7  -7  -1  128.38   68.89
   7  -7   1   91.43   48.51
   7  -6   1  332.22   88.79
  -7  -6  -1  324.93  102.05
  -1  -6   7   95.51   39.61
  -1  -6   7   81.73   32.94
  -1  -5   7   19.41    6.29
  -1  -5   7   18.78   11.63
  -1  -4   7 1223.79   99.49
  -1  -4   7 1190.30  143.39
  -1  -3   7  204.74   56.65
  -1  -3   7  158.80   28.11
   7  -3   1  113.73   21.23
   7  -3   1  220.49   68.46
  -7  -3  -1   76.62   40.57
  -1  -2   7   42.16   26.01
  -7  -2  -1 1125.74  138.71
   7  -2   1   13.67   15.27
   7  -2   1   13.18    9.88
   7  -2   1   21.64   21.28
  -1  -2   7   36.00   10.80
  -7  -2  -1 1365.61  151.89
   7  -1   1  167.10   39.95
   7  -1   1  206.22   49.31
  -1  -1   7  650.68   91.17
   7  -1   1  196.64   56.91
  -7  -1  -1  534.92   89.79
  -7  -1  -1  523.51   86.25
   1  -1  -7  704.92   63.02
  -1  -1   7  759.66   92.63
  -1   0   7 2053.69  160.96
   7   0   1  249.85   56.18
  -7   0  -1  271.45   61.16
   1   0  -7 1573.70   84.42
   7   0   1  267.25   60.07
   7   0   1  256.75   48.18
  -7   0  -1  302.62   65.79
   7   0   1  289.66   55.65
  -1   1   7  673.56   96.16
   1   1  -7  786.38   60.42
   7   1   1  584.43   82.70
   7   1   1  574.08   92.08
  -7   1  -1  260.95   57.64
   7   1   1  499.76   84.64
  -7   1  -1  240.99   44.76
   7   1   1  560.51   68.24
  -7   2  -1   55.42   26.72
   7   2   1 1021.59  108.28
  -7   2  -1   41.29   14.91
  -1   2   7  555.75   92.73
   7   2   1 1090.26  116.95
   7   3   1   85.30   34.94
  -1   3   7  320.15   77.25
   7   3   1  109.26   40.35
  -7   3  -1  158.71   23.37
  -7   3  -1  243.79   61.02
   7   4   1   81.69   39.31
  -1   4   7  614.25  119.68
  -1   5   7  372.16   98.20
  -7   5  -1  228.29   65.80
  -1   6   7  250.07   92.46
   7   6   1  307.76   75.99
   7   6   1  261.50   77.62
  -7   6  -1  308.00   84.15
  -7   7  -1  106.25   52.15
   7   7   1   80.22   46.81
   7   7   1   99.07   44.47
  -1   8   7  266.25  107.69
   7   8   1   64.21   34.89
  -7   8  -1  359.73  105.63
   7   8   1   77.56   53.49
   1   9  -7   59.30   49.90
  -7   9  -1   72.28   52.91
   7   9   1  254.54   91.54
   7   9   1  275.99   79.21
  -1   9   7  276.40  111.38
  -1   9   7  278.16   88.69
   1  10  -7  154.68   87.76
  -7  10  -1   66.49   51.34
  -1  10   7   14.67   18.04
   7  10   1   95.28   51.90
   7  10   1  132.78   71.04
  -1  10   7   19.53   20.00
  -1  11   7  116.09   79.02
  -1  11   7  111.45   61.42
  -7  11  -1  179.98   87.18
   7  11   1    9.66   22.20
   7  11   1    5.75    5.55
   1  11  -7   34.60   40.92
  -1  12   7   76.78   54.01
  -7  12  -1   17.93   11.92
   7  12   1   14.75   11.85
  -1  12   7   74.95   58.24
   1  12  -7   68.49   53.09
   7  12   1   22.44   25.90
  -1  13   7  183.34   82.86
  -7  13  -1   30.40   25.75
   7  13   1   91.08   63.86
   1  13  -7   44.75   50.50
  -1  13   7  175.03  109.20
   7  13   1  107.54   73.82
  -1  14   7    7.13   20.48
  -7  14  -1  -16.43   40.91
   7  14   1  215.87  100.70
   7  14   1  200.73  107.13
   1  14  -7   37.91   42.83
  -1  14   7   24.89   39.94
  -7  15  -1   20.99   31.77
   7  15   1    8.35   19.46
  -1  15   7   28.57   19.67
   1  15  -7   39.51   50.52
  -1  15   7   27.46   52.25
  -1  16   7   67.00   66.49
  -7  16  -1   -8.33   37.80
  -1  16   7   52.81   67.40
   1  16  -7   -0.12   27.90
   7  16   1   -4.67   30.78
   0 -16  -7   11.21   24.42
  -7 -16   0   16.06   36.16
   0 -15   7   30.39   25.91
   0 -15  -7   29.84   23.54
  -7 -15   0  -13.74   49.01
   0 -14   7   35.76   25.57
   0 -14  -7   28.99   32.29
  -7 -14   0   30.29   40.98
   0 -13  -7   88.23   58.05
   0 -13   7  109.27   51.12
  -7 -13   0   96.48   67.97
   0 -12   7   92.54   46.68
   0 -12  -7   66.29   44.12
  -7 -12   0  102.73   67.31
   0 -11   7   12.95   20.31
   7 -11   0    6.97    3.94
   0 -11  -7   11.02   12.10
   0 -10   7   46.31   34.51
   7 -10   0   74.77   51.96
   0 -10  -7   38.86   26.41
  -7 -10   0   80.38   54.51
   0  -9  -7    7.52   11.09
   7  -9   0   70.60   44.40
   0  -9   7   35.82   25.45
   7  -9   0   39.28   19.32
   7  -8   0  486.21   57.48
   7  -8   0  427.41   44.08
   0  -8   7   65.79   32.54
   0  -8   7   61.30   31.38
  -7  -8   0  165.97   70.80
   0  -8  -7   73.02   48.62
   7  -7   0  220.24   29.47
   0  -7  -7   94.75   47.27
  -7  -7   0  686.42  141.62
   7  -7   0  594.90  117.65
   0  -7   7   50.73   28.55
   0  -7   7   55.43   31.63
   7  -7   0  359.16   43.96
   0  -6   7  167.88   55.66
   0  -6   7  146.00   45.85
   7  -6   0  238.78   74.80
   7  -6   0   36.03   10.54
   7  -6   0  161.91   27.89
   7  -5   0    9.37    5.94
   0  -5   7  149.21   51.62
   0  -5   7  167.86   51.07
   7  -5   0   66.33   36.03
   0  -4   7   93.06   31.65
   0  -4   7   87.54   35.22
   7  -3   0   72.70   24.14
   0  -3   7  205.21   40.65
   7  -3   0  101.42   41.74
   0  -3   7  174.98   49.81
  -7  -3   0    7.09   15.41
  -7  -2   0 1124.96  130.63
   7  -2   0  118.74   38.47
   0  -2   7  460.99   76.43
   7  -2   0  173.91   56.93
   0  -2   7  489.56   54.71
  -7  -2   0 1166.08  154.46
   0  -2  -7  419.69   60.27
   0  -2   7  605.04   94.14
   0  -1   7 1881.36  105.90
  -7  -1   0  900.41  106.95
   7  -1   0  197.20   57.91
   0  -1  -7 1625.08  105.32
  -7  -1   0  918.69  103.66
   7  -1   0  162.09   49.00
   7  -1   0  154.75   44.38
   0  -1   7 1955.67  157.37
  -7   0   0   43.25   24.00
   7   0   0   47.61   24.50
  -7   0   0   46.06   23.28
   0   0   7    4.78   13.07
   7   0   0   37.30   24.94
   7   0   0   43.00   27.39
   0   0  -7    1.37    3.90
   7   1   0  941.51   96.55
   0   1  -7 1992.11  120.77
   0   1   7 1841.00  160.85
   7   1   0  908.36  109.94
  -7   1   0  158.73   40.60
  -7   1   0  162.87   37.75
   7   2   0  883.68   90.88
   0   2   7  460.80   92.56
   7   2   0  922.49  102.17
  -7   2   0  155.95   32.40
  -7   2   0  175.78   42.79
   0   2  -7  434.68   55.10
  -7   3   0  113.26   23.07
   7   3   0   -0.69    5.64
   0   3   7  163.63   54.38
   7   3   0    0.67    8.92
  -7   3   0  132.22   45.38
   7   4   0  243.76   58.51
   0   4   7   70.06   38.74
  -7   5   0   59.97   37.87
   0   5   7  140.13   65.25
  -7   6   0  264.36   79.76
   0   6   7  116.70   64.32
   7   7   0  816.93  148.38
   7   7   0  800.54  142.80
  -7   7   0  704.62  135.73
   0   8   7   84.80   56.28
   7   8   0  218.62   77.27
   0   8  -7   66.63   44.55
   7   8   0  186.91   70.62
   7   9   0  588.73  124.47
   7   9   0  561.22  135.35
   0   9  -7   40.16   50.54
   0   9   7   23.89   23.62
  -7   9   0   47.36   29.35
   0   9   7   16.08   13.66
   0  10   7   57.62   54.23
  -7  10   0   61.34   45.23
   7  10   0   87.58   48.86
   0  10  -7   36.52   34.28
   7  10   0   67.97   51.95
   0  10   7   33.11   39.70
   0  11   7    7.06   19.39
  -7  11   0    9.74   23.70
   0  11   7   13.03   15.97
   0  11  -7   -5.41   30.82
   7  11   0   84.06   56.23
   7  11   0  102.25   54.17
   0  12   7   72.78   50.58
   0  12   7   65.61   53.61
   7  12   0  145.98   74.69
   0  12  -7   59.04   57.16
   7  12   0  141.13   73.26
   0  13   7  119.61   62.22
  -7  13   0    5.73   12.23
   7  13   0   88.28   65.58
   7  13   0  101.68   68.84
   0  13  -7  108.55   79.66
   0  13   7  123.87   94.72
   0  14   7   18.85    6.80
  -7  14   0   68.52   55.71
   7  14   0   39.59   45.04
   7  14   0   45.33   54.45
   0  14  -7   39.04   30.17
   0  14   7   45.10   55.27
   0  15   7    9.39   28.01
   7  15   0    8.25   50.59
   7  15   0   18.08   37.23
  -7  15   0   -0.53   16.08
   0  15  -7   21.56   37.02
   0  15   7   35.01   59.34
   0  16   7   13.73   33.42
   7  16   0  -19.39   37.45
   0  16  -7   29.79   54.39
   0  16   7   36.12   57.86
  -1 -16  -7   -9.71   35.56
  -7 -16   1    8.03    6.41
  -1 -15  -7   38.25   34.94
  -7 -15   1   -8.18   34.00
   1 -14   7   14.60   15.75
  -1 -14  -7    5.42    8.82
  -1 -13  -7   28.42   24.10
  -7 -13   1   86.95   63.26
   1 -12   7  104.15   52.90
  -1 -12  -7   48.75   35.20
  -7 -12   1   43.17   51.44
  -1 -11  -7   36.95   37.10
  -7 -11   1  -18.34   44.48
   7 -10  -1   33.08   20.39
   1 -10   7   21.73   21.18
   1 -10   7   19.13   20.35
  -1 -10  -7  117.47   65.30
  -7 -10   1  145.92   82.62
   1  -9   7  254.17   70.98
   1  -9   7  229.81   73.36
   7  -9  -1   47.58   33.45
  -1  -9  -7   64.47   47.16
   7  -9  -1   36.60   18.80
  -7  -9   1  289.81  107.72
   1  -8   7  258.72   69.15
   7  -8  -1  196.44   36.06
   1  -8   7  229.56   67.86
   7  -8  -1  250.65   86.41
   7  -8  -1  223.74   50.62
  -1  -8  -7  150.49   67.86
  -7  -8   1   69.97   54.49
   1  -7   7  442.98   89.22
   7  -7  -1   58.80   19.45
   1  -7   7  390.71   81.02
   7  -7  -1  101.00   53.02
   7  -7  -1   81.30   26.19
  -1  -7  -7   31.14   27.72
  -7  -7   1   98.67   57.00
   1  -6   7  303.32   71.40
   7  -6  -1  308.53   80.77
   1  -6   7  285.29   67.99
  -1  -6  -7   71.59   40.58
  -7  -6   1  324.03  100.76
   7  -6  -1  187.21   32.89
   1  -5   7  418.96   78.35
   7  -5  -1  186.52   64.78
   1  -5   7  388.80   74.85
   7  -5  -1  168.53   31.35
  -7  -4   1  101.09   43.00
   7  -4  -1 2087.17  215.61
   1  -4   7  739.84   98.62
   1  -4   7  666.73   94.70
   7  -4  -1 1481.99   97.55
   1  -3   7  312.81   61.26
   7  -3  -1  194.37   40.13
  -7  -3   1   98.03   41.57
   7  -3  -1  236.40   64.88
   1  -3   7  351.52   61.17
  -7  -2   1 1121.19  107.75
   1  -2   7  537.51   65.21
   7  -2  -1   38.94   25.47
   1  -2   7  696.26  104.84
  -7  -2   1 1267.25  140.19
   7  -2  -1   41.43   20.09
  -7  -1   1  628.19   78.06
   7  -1  -1  304.21   73.85
  -1  -1  -7  697.45   76.46
   1  -1   7  636.49   68.51
   7  -1  -1  281.54   64.90
  -7  -1   1  538.13   86.40
   1  -1   7  708.26   98.73
  -7   0   1  307.86   49.22
  -1   0  -7 1601.95  112.64
   7   0  -1  234.51   54.22
   1   0   7 2083.93  179.99
   7   0  -1  273.90   64.06
   7   0  -1  269.49   58.89
  -7   0   1  312.36   60.19
  -7   1   1  208.40   46.54
   1   1   7  658.76  102.19
  -1   1  -7  807.01   86.87
   7   1  -1  491.00   76.29
  -7   1   1  225.00   43.74
   7   1  -1  480.80   56.23
   7   2  -1 1023.20   88.25
  -7   2   1   24.13   17.15
  -7   2   1   20.68   14.37
   1   2   7   31.25   25.96
  -1   2  -7  647.58   80.66
   7   2  -1 1067.08  106.32
  -7   3   1  207.98   35.03
  -7   3   1  224.41   63.01
  -1   3  -7  227.16   48.57
   7   3  -1   71.27   25.74
   1   3   7  156.47   53.86
   7   3  -1   96.23   32.30
   1   4   7 1001.95  150.24
   7   4  -1  104.37   39.40
   1   5   7   21.78   21.26
  -7   5   1  260.17   75.87
   1   6   7   89.31   50.08
  -7   6   1  359.07   94.57
   7   6  -1  275.28   77.38
   7   7  -1  108.49   50.30
   1   7   7   14.12   19.88
  -7   7   1   93.12   49.53
   1   8   7  165.28   82.11
   7   8  -1   89.98   51.06
   7   8  -1   74.00   41.01
  -1   8  -7  253.75  101.87
  -7   8   1  340.81  101.94
   7   9  -1  193.82   74.57
  -7   9   1   74.77   52.53
   1   9   7   70.02   61.28
   7   9  -1  256.40   94.27
  -1   9  -7  240.25  101.47
   1   9   7   51.14   35.63
   1  10   7  128.05   83.43
   7  10  -1  173.42   75.01
  -1  10  -7   29.52   34.84
  -7  10   1   37.08   34.84
   1  10   7  142.70   59.50
  -7  11   1  112.18   63.72
  -1  11  -7  131.47   80.29
   1  11   7   59.01   59.98
   1  11   7   27.47   25.96
   7  11  -1   -1.27   23.48
  -7  12   1   20.80   35.15
   1  12   7   90.75   69.42
   7  12  -1   20.50   22.90
   1  12   7   73.65   45.94
  -1  12  -7   55.95   47.75
   1  13   7   41.20   34.70
   1  13   7   98.43   73.46
   7  13  -1   66.63   52.39
  -7  13   1   47.11   46.63
  -1  13  -7  196.37   97.77
  -7  14   1   20.56   31.10
   1  14   7   38.25   42.81
   1  14   7   14.66   30.34
  -1  14  -7   11.19   16.37
  -7  15   1    4.30   17.75
   1  15   7   61.77   65.11
   1  15   7   35.97   37.65
   7  15  -1   10.24   23.28
  -1  15  -7  -19.37   38.77
   1  16   7  -11.20   26.14
  -7  16   1    2.58    9.66
   1  16   7   13.57   16.63
   7  16  -1   39.28   48.58
  -1  16  -7   45.97   57.56
   2 -16   7   40.32   44.32
  -7 -16   2    7.53   29.53
  -2 -16  -7    8.28   32.57
  -7 -15   2   26.83   34.11
   2 -15   7    0.40   21.25
  -2 -15  -7    0.21    7.12
  -7 -14   2   54.05   50.40
   2 -14   7   57.58   37.89
  -2 -14  -7  149.52   78.81
   2 -13   7   32.80   30.60
   2 -13   7   29.13   33.39
  -2 -13  -7  120.34   67.85
  -7 -13   2  116.76   70.61
   2 -12   7  142.08   57.36
  -2 -12  -7   46.24   37.10
   2 -12   7  128.25   62.65
  -7 -12   2   50.87   47.82
   2 -11   7  124.20   60.00
   2 -11   7  119.30   51.64
  -2 -11  -7   33.81   30.47
  -7 -11   2   99.36   61.85
   2 -10   7  318.20   91.30
   2 -10   7  363.11   82.57
   7 -10  -2   25.79   16.73
  -2 -10  -7  383.04  119.72
  -7 -10   2   52.07   37.37
   2  -9   7  150.45   52.47
   7  -9  -2  105.48   41.34
   2  -9   7  101.66   47.58
  -2  -9  -7  496.93  130.06
  -7  -9   2  537.80  129.26
   2  -8   7  271.14   70.20
   7  -8  -2   56.87   26.90
   2  -8   7  207.84   66.81
  -2  -8  -7  129.92   63.09
   2  -7   7  567.93   93.56
   7  -7  -2  199.69   39.95
   7  -7  -2  286.25   85.86
   2  -7   7  567.50  108.18
  -7  -7   2  382.02   97.54
  -2  -7  -7  124.19   57.27
  -7  -6   2   33.58   27.34
   7  -6  -2  189.65   41.52
   2  -6   7  621.14   91.98
   7  -6  -2  194.65   64.71
   2  -6   7  765.68  132.83
  -2  -6  -7  572.52  122.58
   7  -5  -2  218.83   43.99
   2  -5   7  354.41   67.31
   7  -5  -2  290.14   73.43
   2  -5   7  378.02   79.68
   2  -4   7  168.23   43.61
   7  -4  -2  261.35   47.89
   7  -4  -2  328.31   79.92
   2  -4   7  204.64   56.19
  -7  -4   2  345.89   83.41
  -2  -4  -7  363.69   69.92
   7  -3  -2  627.12  112.52
   2  -3   7  766.74  100.37
  -7  -3   2  347.93   81.02
  -2  -3  -7  286.08   60.59
   7  -3  -2  526.13   72.05
  -7  -2   2  197.73   55.48
   7  -2  -2  239.05   60.79
   2  -2   7   95.81   30.96
   7  -2  -2  195.09   49.92
   2  -2   7  119.63   46.05
  -7  -1   2  231.61   38.93
   2  -1   7   37.02   22.78
  -7  -1   2  259.08   62.97
   2  -1   7   40.42   21.24
   7  -1  -2  964.33  122.31
   7  -1  -2  824.11  100.60
   2   0   7  513.79   93.75
  -7   0   2  517.11   50.60
   7   0  -2  544.62   78.20
   2   0   7  504.86   71.19
  -7   0   2  589.72   89.10
  -7   1   2  889.96   97.74
   2   1   7  543.95   93.86
  -7   1   2 1013.73   84.22
   7   1  -2  218.35   48.23
  -2   1  -7   17.01   12.99
   7   2  -2  188.60   30.83
  -7   2   2  163.12   39.65
   2   2   7  101.53   45.63
  -2   2  -7  155.13   48.07
   7   2  -2  211.58   45.34
  -7   3   2  471.74   59.89
   7   3  -2  325.47   48.18
   2   4   7  412.33  100.10
   7   4  -2  401.83   70.14
  -7   4   2  430.92   97.65
   7   5  -2  120.96   45.95
  -7   5   2  309.12   84.33
   2   6   7  599.54  139.22
  -2   6  -7  548.64  131.16
  -7   6   2  312.85   90.04
  -2   7  -7  487.59  128.66
  -7   7   2  489.58  116.25
  -7   8   2  104.17   53.88
   2   8   7  177.56   86.87
  -2   8  -7  265.16   99.62
  -7   9   2  146.34   67.96
   2   9   7  562.22  163.26
  -2   9  -7  101.28   62.91
   7   9  -2  577.80  144.85
   2   9   7  540.00  109.32
  -2  10  -7  301.98  109.98
   2  10   7  464.01  158.93
  -7  10   2   19.95   27.61
   7  10  -2   66.36   48.91
   2  10   7  414.47  105.93
   2  11   7   36.19   27.09
   7  11  -2   89.02   59.04
  -2  11  -7  139.47   80.69
  -7  11   2  209.07   96.86
   2  11   7   61.55   65.76
   2  12   7   92.19   70.57
  -2  12  -7  116.93   74.62
   7  12  -2   57.22   43.35
   2  12   7   58.51   42.42
  -7  12   2   33.97   39.41
   2  13   7  152.39   70.87
  -7  13   2   78.41   53.89
  -2  13  -7   38.12   51.24
   2  13   7  146.02  100.84
   7  13  -2  146.20   77.47
  -7  14   2    8.37   28.03
   2  14   7  179.08   82.99
  -2  14  -7   63.14   58.52
   7  14  -2   64.35   46.24
   2  15   7   -0.65   36.38
  -7  15   2  122.67   83.10
  -2  15  -7    2.21   35.93
   7  15  -2   28.57   34.84
   2  15   7    6.93   38.38
  -7  16   2   10.42    8.65
   2  16   7   70.06   85.10
  -2  16  -7    9.26   15.23
   7  16  -2   15.65    6.94
  -7 -16   3   35.51   44.55
   3 -16   7    2.14   19.57
  -3 -16  -7    2.18   27.00
  -3 -15  -7  -14.29   35.00
   3 -15   7   25.01   39.84
  -7 -14   3   23.36   28.15
  -3 -14  -7  105.09   67.06
   3 -14   7   35.50   38.87
  -7 -13   3   -1.27    9.48
  -3 -13  -7   64.56   48.19
   3 -12   7   47.38   31.10
  -7 -12   3   79.67   61.73
  -3 -12  -7  -10.88   23.14
   3 -11   7  109.79   49.15
   3 -11   7  116.33   55.86
  -3 -11  -7   26.87   30.31
   7 -11  -3   59.63   31.48
  -7 -10   3   64.73   33.86
   3 -10   7   32.79   24.68
  -3 -10  -7  134.62   71.37
   3 -10   7   31.04   33.41
  -7  -9   3   -3.23   16.72
   7  -9  -3  112.49   42.95
   3  -9   7  101.34   50.44
   3  -9   7  149.86   50.24
  -3  -8  -7  146.50   69.41
   7  -8  -3  232.52   58.26
   3  -8   7   14.63   18.73
   3  -8   7   12.41   10.62
  -7  -8   3  127.01   56.79
  -7  -7   3  245.23   79.57
   3  -7   7  133.64   42.19
   7  -7  -3  201.31   69.77
   3  -7   7  190.72   71.87
  -3  -7  -7   56.42   39.87
  -7  -6   3    6.37   16.04
   3  -6   7  119.77   36.37
   7  -6  -3  106.02   45.17
  -3  -6  -7  119.86   56.80
   3  -6   7  120.08   53.82
  -7  -5   3   11.05    8.84
   3  -5   7   14.50   13.30
   7  -5  -3  813.47  122.26
   3  -5   7   25.78   27.03
   7  -5  -3  645.65   83.83
  -3  -5  -7  224.52   76.65
  -3  -5  -7  229.40   56.90
   7  -4  -3  337.35   61.31
   7  -4  -3  348.76   79.60
   3  -4   7  366.70   82.67
  -3  -4  -7  105.05   34.15
  -3  -4  -7   82.03   39.26
   3  -3   7  257.91   61.51
   7  -3  -3   91.39   46.63
  -3  -3  -7  232.54   49.74
   7  -2  -3   94.90   37.55
  -7  -2   3  117.77   44.23
  -7  -2   3  116.21   39.70
   3  -2   7  176.93   47.52
   3  -2   7  227.02   64.53
  -7  -1   3  211.50   57.34
  -7  -1   3  190.83   48.95
   3  -1   7  186.49   48.82
   3  -1   7  157.65   53.30
   3   0   7  175.64   55.71
  -7   0   3 1064.83  118.36
   7   0  -3  847.38   95.22
   3   0   7  174.15   45.53
   3   1   7  292.81   72.81
   3   1   7  358.84   68.37
   7   1  -3  179.28   43.24
  -7   1   3  649.56   96.51
  -7   1   3  599.97   54.43
  -7   2   3  110.82   34.24
   7   2  -3   97.87   28.90
   3   3   7  208.95   69.25
   7   3  -3  336.95   43.24
  -3   4  -7  197.46   79.75
   3   4   7   93.19   48.89
   7   5  -3   23.40   12.70
  -3   5  -7   17.63   28.64
   3   6   7  155.25   72.97
  -3   6  -7  140.46   67.42
  -7   6   3  110.87   56.55
   3   7   7   62.97   52.09
  -3   7  -7  112.92   64.97
  -7   7   3  224.86   80.19
  -7   8   3  273.73   95.46
   3   8   7  185.06   89.71
  -3   8  -7    2.50   11.22
  -3   9  -7  127.29   67.48
   3   9   7  351.26   85.97
  -7   9   3  225.09   89.33
   3   9   7  382.16  133.08
  -3  10  -7   19.40   17.34
   3  10   7  184.51   66.10
   7  10  -3  143.78   79.72
   3  10   7  213.89  108.42
   3  11   7    8.11   14.45
   3  11   7   30.80   44.03
  -7  11   3   78.43   51.40
  -3  11  -7  146.40   74.31
   3  12   7    7.21    9.75
  -7  12   3   66.60   54.15
   3  12   7    9.15   22.33
  -3  12  -7   61.39   60.35
   7  12  -3  103.27   65.96
  -7  13   3  118.37   80.05
   7  13  -3    5.12    1.64
   3  13   7   81.54   46.18
   3  13   7  155.08  108.63
  -3  13  -7  132.90   91.24
  -7  14   3  148.53   85.63
   7  14  -3   18.98   25.46
   3  14   7  138.17   71.23
   3  14   7  181.70  122.28
  -3  14  -7   68.95   64.82
  -7  15   3  -21.30   46.09
   3  15   7   12.58   47.19
  -3  15  -7   37.56   51.02
  -7  16   3   15.49   23.90
   3  16   7   -3.00   42.81
  -3  16  -7   16.15   18.56
   7  16  -3   22.36   36.25
   4 -15   7   69.38   44.67
  -7 -15   4   24.40   33.08
  -4 -15  -7   42.03   55.58
  -7 -14   4   69.32   56.97
   4 -14   7   30.85   31.20
  -4 -14  -7    7.31   30.95
  -7 -13   4   21.08   43.81
   4 -13   7   24.73   31.70
  -4 -13  -7   78.06   55.22
   4 -12   7  102.68   57.92
  -4 -12  -7   -3.69   15.26
  -7 -11   4   57.52   43.22
   4 -11   7   17.94   31.59
  -4 -11  -7   14.78   26.47
   7 -11  -4    4.69   10.16
   4 -10   7    8.79   15.71
   4 -10   7   16.49   13.85
  -4 -10  -7   50.40   39.03
   7 -10  -4   33.02   27.44
  -7  -9   4   25.55   32.67
   4  -9   7    7.99   11.66
   7  -9  -4    3.45   10.32
   4  -9   7   17.66   29.02
  -4  -9  -7   41.71   44.27
   4  -8   7  157.07   42.02
  -4  -8  -7   97.46   58.10
   4  -8   7  178.68   74.11
  -7  -7   4  114.17   55.09
   4  -7   7    5.00   10.18
  -4  -7  -7   88.45   50.31
   4  -7   7    8.07   12.51
  -4  -6  -7    8.38    3.51
   4  -6   7   36.44   34.99
  -7  -6   4   68.29   43.25
  -4  -6  -7   17.44   18.16
  -4  -5  -7   50.55   33.07
   4  -5   7  219.44   71.72
   7  -5  -4    4.23    8.52
  -4  -5  -7   54.47   25.30
  -7  -5   4  148.90   57.72
  -4  -4  -7  175.56   40.57
  -4  -4  -7  157.35   62.26
   4  -4   7  205.83   65.99
  -7  -4   4  277.11   51.77
   7  -4  -4    4.09    2.64
  -7  -4   4  373.52   88.88
  -7  -3   4    2.53    6.14
  -4  -3  -7  207.81   65.66
   4  -3   7  130.53   46.39
  -7  -3   4   -1.31   11.61
  -4  -3  -7  247.65   45.13
  -7  -2   4  224.15   64.39
  -7  -2   4  180.71   48.98
   4  -2   7  401.93   76.42
   4  -2   7  510.47  101.59
  -7  -1   4  575.45   84.32
   4  -1   7 1113.52  127.73
  -7  -1   4  538.81   96.41
   4  -1   7 1023.95  132.69
  -7   0   4  225.45   57.66
  -7   0   4  189.83   47.18
   7   0  -4  185.48   41.42
   4   0   7   94.89   44.18
   4   0   7   68.44   28.92
   4   1   7  602.37  105.26
  -7   1   4   10.43    6.16
  -7   1   4   10.60    8.21
   7   1  -4  505.95   67.84
   4   1   7  621.69   94.34
   7   2  -4  161.75   36.44
   4   2   7  141.00   57.37
   7   3  -4    4.65    4.11
  -4   3  -7   86.90   40.49
   7   4  -4  358.06   57.09
   4   4   7  150.12   62.21
  -4   4  -7  164.33   64.92
  -4   5  -7  167.40   71.75
   4   5   7   36.82   34.26
  -4   6  -7   25.09   29.43
   4   6   7   10.04    5.73
   4   7   7  141.14   70.24
  -4   7  -7    3.99    8.26
  -7   7   4  149.86   67.32
  -4   8  -7  125.16   67.36
   4   8   7   82.95   63.25
  -7   8   4   66.71   50.08
  -7   9   4    3.90   12.81
   4   9   7   87.68   57.86
  -4   9  -7   -2.23    8.96
   4   9   7   54.07   32.21
  -7  10   4   78.32   53.00
  -4  10  -7    5.37   15.49
   4  10   7   66.82   61.66
   7  10  -4  129.51   74.59
   4  10   7   84.81   43.28
   4  11   7   14.81   14.69
  -7  11   4   -1.40   11.68
  -4  11  -7   11.18   40.47
   4  11   7   33.77   50.68
   7  11  -4   76.83   54.60
  -4  12  -7   64.05   57.35
   4  12   7   -4.26   16.43
   4  12   7  -18.18   35.53
  -7  12   4   29.72   33.80
  -7  13   4   13.55   27.93
   7  13  -4    6.56   20.61
  -4  13  -7    1.76   22.66
  -7  14   4    2.22   12.94
   4  14   7   27.19   43.77
  -4  14  -7   45.52   56.34
   7  14  -4   97.30   73.08
  -7  15   4  -13.88   33.45
   4  15   7    4.89   15.63
  -4  15  -7   75.80   77.29
   7  15  -4   42.34   45.31
  -7 -15   5  114.68   66.47
   5 -15   7   91.33   59.83
  -5 -15  -7   22.42   34.28
  -7 -14   5    0.18   23.17
   5 -14   7   -6.54   29.43
  -5 -14  -7   74.07   56.93
  -7 -13   5    1.80   27.92
   5 -13   7   41.98   38.23
  -5 -13  -7   20.94   25.53
   7 -12  -5    4.02    9.72
  -7 -12   5   77.28   51.71
   5 -12   7   80.88   51.46
  -5 -12  -7   55.77   45.30
  -5 -11  -7   22.27   15.98
   7 -11  -5   23.27   19.06
  -7 -10   5   56.40   40.72
   5 -10   7   36.01   36.48
  -5 -10  -7   38.32   33.37
   7 -10  -5  100.42   45.09
  -7  -9   5   65.80   42.32
   5  -9   7   37.69   18.87
   5  -9   7   54.22   49.49
  -5  -9  -7    7.90   14.86
  -5  -8  -7   19.34   28.41
   5  -8   7  116.19   58.07
  -5  -7  -7   25.91   26.31
  -7  -7   5   57.07   34.85
  -7  -6   5  102.26   50.66
  -5  -6  -7   86.84   29.92
  -5  -6  -7  113.85   56.58
  -5  -5  -7  130.99   33.14
   7  -5  -5  271.59   69.82
   5  -5   7  223.63   75.15
  -5  -5  -7  163.07   66.76
  -7  -5   5  163.57   56.17
   7  -4  -5  376.09   79.49
  -7  -4   5  287.57   49.82
  -5  -4  -7  182.68   37.22
   5  -4   7   80.28   48.38
  -5  -4  -7  148.25   56.93
  -7  -4   5  381.24   88.70
  -7  -3   5  361.74   89.04
  -5  -3  -7   12.40    8.39
  -7  -3   5  315.03   57.09
   7  -3  -5   79.98   35.42
   5  -3   7  258.24   67.77
  -5  -3  -7   17.95   21.68
  -7  -2   5   81.37   31.76
   7  -2  -5  263.37   58.40
  -7  -2   5   75.10   37.28
   5  -2   7  792.39  116.82
  -5  -2  -7  294.52   78.36
   5  -2   7  917.77  140.30
  -7  -1   5   70.62   35.67
   5  -1   7   24.29   20.33
  -7  -1   5   61.67   25.91
   5  -1   7   17.41   17.27
  -7   0   5  505.41  100.72
   5   0   7  112.11   52.55
   7   0  -5  376.66   55.43
   5   0   7  115.35   42.14
   5   1   7  303.59   76.02
  -7   1   5  427.12   83.25
   7   1  -5   78.73   24.46
   5   1   7  345.25   75.57
  -5   1  -7   29.96   21.69
  -7   2   5  208.96   53.80
  -7   2   5  242.75   44.93
   5   2   7  292.06   78.62
   5   2   7  346.37   79.88
   5   3   7   24.90   25.68
  -5   3  -7  188.36   60.53
  -5   4  -7   44.63   20.93
  -5   4  -7   56.25   36.04
  -5   5  -7  141.17   58.19
   5   5   7  155.96   66.40
  -5   5  -7  145.49   35.58
  -5   6  -7  634.71  130.55
  -5   6  -7  596.26   80.93
  -5   7  -7  379.13  105.63
   5   7   7   30.39   28.03
   5   8   7    7.70   24.42
  -5   8  -7   68.93   46.88
  -7   8   5  125.52   67.08
   5   9   7  -10.39   25.56
  -5   9  -7   39.83   44.47
   5  10   7   84.57   39.61
   5  10   7   77.20   53.65
  -5  10  -7   36.06   45.23
  -7  10   5  102.22   63.57
  -5  11  -7  308.38  119.34
  -7  11   5   63.77   51.88
   5  11   7   39.52   47.21
   7  11  -5  214.38  106.22
  -7  12   5    6.52   15.48
  -5  12  -7   69.49   61.63
   5  12   7   86.86   79.30
   7  12  -5   73.96   50.99
  -7  13   5   15.71    4.76
   5  13   7   -2.77   40.50
  -5  13  -7   29.94   42.73
   7  13  -5   27.77   44.24
  -5  14  -7   24.41   38.60
   7  14  -5   11.04   24.83
  -7  14   5  154.59   85.94
   5  14   7  103.94   78.13
  -7  15   5   12.69   30.55
   5  15   7   -6.48   53.27
  -5  15  -7   81.88   83.49
   7  15  -5  116.13   83.19
  -7 -15   6   14.30   24.55
   6 -15   7  -26.94   42.60
  -6 -15  -7   15.80    6.82
  -7 -14   6   17.92   30.98
   6 -14   7   22.48   25.39
  -6 -14  -7   64.26   64.32
  -7 -13   6  100.56   56.25
   6 -13   7   18.72   43.52
  -6 -13  -7  113.83   71.35
  -7 -12   6   78.94   51.57
  -6 -12  -7   82.94   61.95
   7 -12  -6    7.22   26.28
   6 -12   7   69.95   53.01
  -6 -11  -7   -5.09   27.65
  -7 -11   6  222.69   85.43
   7 -11  -6  161.99   68.30
   6 -11   7  172.01   87.04
  -7 -10   6   79.10   46.83
   6 -10   7  153.89   83.23
   7 -10  -6   45.34   31.85
  -6 -10  -7  218.69   90.14
  -6  -9  -7  722.32  155.89
  -7  -9   6  408.72  113.83
   6  -8   7   81.34   45.14
  -6  -8  -7   58.72   40.33
  -6  -7  -7   13.35   15.18
  -7  -7   6  281.58   82.18
   6  -6   7  390.42  104.02
  -6  -6  -7  212.05   40.25
  -6  -6  -7  290.53   93.21
   6  -5   7  131.13   61.53
  -7  -5   6   70.22   43.48
   7  -5  -6  151.01   54.17
  -7  -5   6   46.85   18.93
  -7  -4   6  510.64  111.68
   7  -4  -6  336.12   72.14
  -7  -4   6  423.62   63.41
  -6  -4  -7   26.21   18.35
   6  -4   7   22.10   23.15
  -7  -3   6  469.90  100.32
   7  -3  -6  146.56   48.04
  -7  -3   6  449.18   61.30
   6  -3   7  129.46   52.00
  -6  -3  -7   92.14   44.02
  -7  -2   6   73.90   24.39
  -6  -2  -7  256.55   31.20
  -6  -2  -7  472.57  103.06
   7  -2  -6   81.61   33.74
   6  -2   7  534.44   98.27
  -7  -2   6   79.55   37.61
   6  -2   7  576.99  118.33
  -6  -2  -7  516.59   41.40
  -7  -1   6  189.46   65.42
   6  -1   7   70.67   37.53
  -6  -1  -7  169.75   32.76
   6  -1   7   74.82   35.89
  -6  -1  -7  245.01   70.88
  -7   0   6  576.52  101.82
  -6   0  -7  121.60   33.95
   6   0   7  152.28   57.76
   7   0  -6  509.32   60.57
   6   0   7  135.49   48.79
  -6   0  -7  118.69   44.97
   6   1   7  237.38   71.71
  -6   1  -7   72.52   30.04
   7   1  -6  147.84   27.57
   6   1   7  249.86   67.07
   6   2   7  532.42  106.22
  -7   2   6   25.09   19.48
  -6   2  -7  508.45   89.47
   6   2   7  609.85  109.29
  -7   2   6   27.39   15.13
  -7   3   6  172.47   48.78
  -6   3  -7   96.25   40.80
   6   3   7  102.97   53.68
  -6   4  -7   11.46   12.35
   6   4   7   29.97   33.17
  -7   4   6  410.36   83.78
   7   4  -6  464.64   48.95
  -6   4  -7   14.48    9.46
  -6   5  -7  107.05   53.09
  -6   5  -7   77.45   25.02
  -6   6  -7  298.14   91.84
   6   6   7  240.40   85.86
  -6   6  -7  221.44   46.10
  -6   7  -7  543.29  131.48
   6   7   7   29.24   36.67
  -6   8  -7   92.04   60.70
   6   8   7   94.67   58.09
  -6   9  -7   26.01   29.79
   6   9   7  921.94  204.32
  -6  10  -7  122.54   70.39
   6  10   7  370.38  134.11
  -6  11  -7  200.15  105.37
   6  11   7   11.08   22.43
   7  11  -6  309.45  125.47
  -7  11   6  201.62   98.27
   7  12  -6  139.03   93.69
   6  12   7   45.47   52.41
  -6  12  -7   51.04   45.31
  -7  12   6  -15.54   35.86
  -6  13  -7   19.23   36.78
   6  13   7  126.30   96.90
   7  13  -6  174.20   99.06
  -7  13   6   18.31   29.80
  -6  14  -7   60.56   68.90
   6  14   7   93.38   80.94
   7  14  -6   27.43   40.41
  -7  14   6   -6.54   21.49
  -6  15  -7   57.28   67.42
   6  15   7   53.76   77.61
   7  15  -6   35.82   40.37
  -7  15   6   90.89   61.18
  -7 -14   7   99.70   59.16
  -7 -14  -7   47.91   24.39
   7 -14   7  120.16   74.70
  -7 -13   7   88.16   55.96
   7 -13   7   71.78   48.57
  -7 -13  -7   67.38   51.37
  -7 -12   7    6.75   15.06
   7 -12   7    8.95   16.99
   7 -12  -7    7.80   24.92
  -7 -12  -7   -3.33   19.32
  -7 -11   7   30.23   31.97
   7 -11  -7   65.53   52.09
   7 -11   7  110.25   69.11
  -7 -11  -7   33.76   38.15
   7 -10   7   65.88   47.89
  -7 -10  -7  157.85   82.45
  -7 -10   7  190.32   76.40
  -7  -9  -7  263.61  100.54
   7  -9   7   58.67   48.86
  -7  -9   7  364.84  103.13
  -7  -8   7   65.39   43.23
   7  -8   7   58.69   47.90
  -7  -8  -7   39.51   33.51
  -7  -7   7   51.13   36.54
   7  -7   7   49.56   39.24
  -7  -7  -7   32.18   29.68
  -7  -6   7  645.58  137.24
  -7  -6  -7  437.26  112.15
  -7  -5   7  478.90  111.75
  -7  -5   7  391.98   55.17
  -7  -5  -7  327.10   94.47
  -7  -4   7   -4.97   12.81
  -7  -4   7    0.28    3.29
  -7  -4  -7   -1.28   18.18
  -7  -3   7  133.06   55.27
  -7  -3  -7  119.63   54.79
  -7  -3   7  101.97   26.03
   7  -3  -7   66.06   30.35
   7  -3   7   47.72   39.44
   7  -2   7   83.23   46.10
   7  -2   7   85.43   43.85
   7  -2  -7  122.77   38.12
  -7  -1  -7  327.77   83.92
  -7  -1  -7  356.72   37.24
  -7  -1   7  398.89   91.17
   7  -1   7   14.11   16.92
   7  -1   7   26.27   23.10
   7  -1  -7   27.68   18.38
  -7   0   7   61.43   32.09
   7   0   7   40.45   34.67
   7   0  -7   69.90   19.59
  -7   0  -7   77.14   25.39
   7   0   7   63.35   34.67
  -7   0  -7   58.92   31.77
  -7   1   7   22.06   23.13
  -7   1   7   23.61   10.80
  -7   1  -7   17.87   16.82
   7   1   7  389.30   89.12
   7   1  -7  356.50   41.08
   7   1   7  382.34   96.21
  -7   1  -7   11.03    6.45
   7   2   7  463.75  103.03
  -7   2  -7  108.85   40.44
   7   2   7  552.15  108.93
  -7   2   7   79.97   38.05
  -7   2   7   92.81   26.84
  -7   2  -7  104.55   39.55
  -7   3   7   82.02   32.41
  -7   3  -7   42.32   19.44
  -7   3  -7   60.17   36.21
  -7   3  -7   51.53   23.41
   7   3   7  118.53   55.41
  -7   4   7  145.85   53.92
   7   4   7   -1.05   24.87
  -7   4  -7   58.17   22.81
   7   4  -7    4.27    4.46
  -7   4  -7  103.99   48.19
  -7   5  -7    8.01   18.06
  -7   5   7   34.78   31.18
  -7   5  -7    4.54    3.41
  -7   6   7   35.05   36.66
  -7   6  -7   15.31   23.49
  -7   7  -7   21.79   27.90
   7   7   7   31.86   33.76
  -7   8  -7   33.75   37.83
   7   8   7   64.66   53.85
  -7   9  -7   63.58   47.47
   7   9   7  309.59  115.78
   7  10   7  203.05   99.09
  -7  10  -7   64.74   58.32
   7  11   7   35.19   44.82
  -7  11  -7   63.15   56.21
   7  12   7   20.63   42.99
   7  12  -7   -7.65   38.58
  -7  12  -7    4.09   20.73
   7  13   7   58.16   65.89
  -7  13  -7   67.11   67.54
   7  13  -7  144.40   89.22
  -7  14  -7  116.95   88.99
   7  14   7  133.52   94.18
  -7  14   7   83.21   72.91
   7  14  -7  175.35  108.11
  -7 -14   8   18.74   31.00
   8 -14   7  117.60   87.22
  -8 -14  -7   21.61   38.23
  -7 -13   8   -3.10   20.18
   8 -13   7   -4.95   15.35
  -8 -13  -7   -9.38   33.98
   7 -13  -8   16.28    8.35
   8 -12   7   24.23   37.28
  -7 -12   8   61.70   52.07
  -8 -12  -7    1.69   20.86
   7 -11  -8    1.37   15.60
  -8 -11  -7   79.69   56.08
   8 -11   7   78.77   61.23
  -7 -11   8   43.57   43.19
   8 -10   7   19.31   26.14
  -8 -10  -7   20.08   20.27
  -8  -9  -7   17.48    8.97
   8  -9   7   64.38   48.71
  -7  -9   8   52.65   42.45
  -8  -8  -7   17.15   25.98
   8  -8   7    2.42   24.96
  -7  -7   8   48.44   41.36
   8  -7   7   85.27   54.76
  -8  -7  -7   21.64   22.31
  -8  -6  -7   89.54   52.60
   8  -6   7   75.63   56.76
  -7  -5   8   37.58   28.23
   8  -5   7    4.90   12.29
  -8  -5  -7   38.07   30.38
  -7  -4   8  157.64   63.28
   7  -4  -8  131.97   45.99
   8  -4   7   77.04   46.31
  -8  -4  -7   83.03   46.24
  -7  -3   8   37.52   36.33
   7  -3  -8  186.29   49.77
   8  -3   7  191.90   70.50
  -8  -3  -7    2.48   14.38
  -7  -2   8  306.37   85.99
   7  -2  -8  217.99   50.70
  -8  -2  -7  187.52   65.27
   8  -2   7  151.20   58.80
   8  -1   7  164.15   62.41
  -8  -1  -7  182.45   62.59
   7  -1  -8  186.94   39.85
  -7  -1   8  326.28   87.69
   8  -1   7  137.32   59.00
   8   0   7   56.27   33.80
  -7   0   8    4.20    4.41
   8   0   7   47.30   33.46
  -8   0  -7   53.81   32.10
  -8   0  -7   74.49   22.75
   7   0  -8   11.21    6.67
   8   1   7  277.12   85.80
  -8   1  -7  182.66   45.31
  -7   1   8  134.51   50.37
   8   1   7  232.66   73.98
  -8   1  -7  132.78   48.12
  -7   1   8  141.46   29.22
   8   2   7  207.76   75.92
  -8   2  -7  153.63   51.00
  -7   2   8  188.36   41.44
   8   2   7  225.54   70.46
  -8   2  -7   96.85   38.56
  -8   3  -7  156.30   60.83
  -7   3   8  182.30   48.57
  -8   3  -7   91.82   34.93
   8   3   7    4.15   12.22
   8   4   7  144.73   65.49
  -8   4  -7  124.00   58.83
  -8   4  -7   71.04   27.90
  -7   4   8  200.75   61.33
  -8   5  -7   10.84   16.17
  -8   5  -7    7.16    5.67
  -7   6   8   34.41   33.07
   8   6   7   85.09   55.15
  -8   6  -7   96.54   57.14
  -8   7  -7   71.28   54.26
   8   7   7   60.76   48.28
  -7   7   8   26.81   33.67
  -8   8  -7    6.77   22.17
   8   8   7   11.18   16.45
  -8   9  -7   37.85   44.80
  -7   9   8  127.87   75.90
   8   9   7   41.71   52.42
  -8  10  -7   26.12   40.10
   8  10   7   30.55   38.38
  -7  10   8   29.64   24.25
   8  11   7  100.81   70.99
  -8  11  -7   94.73   78.58
   8  12   7    8.72   11.02
  -8  12  -7   31.52   43.88
   7  12  -8   59.00   64.52
   8  13   7  -19.51   33.59
  -8  13  -7   21.28   33.28
   7  13  -8    1.43   31.61
   8  14   7   41.36   61.00
  -8  14  -7   43.57   53.94
   7  14  -8   23.38   36.61
  -6 -14   8   66.69   44.60
   8 -14   6    3.62   13.01
   6 -14  -8    5.89   20.20
  -8 -14  -6   42.66   53.77
  -6 -13   8   25.03   29.92
   8 -13   6   76.11   67.81
   6 -13  -8   41.87   41.64
  -8 -13  -6   35.99   46.22
  -6 -12   8   80.79   50.57
   6 -12  -8    0.88   18.84
  -8 -12  -6   19.92   46.75
  -6 -11   8   69.74   42.68
  -8 -11  -6   28.71   33.51
   8 -11   6   54.07   50.40
   6 -11  -8  133.57   70.56
  -6 -10   8   67.44   42.38
  -8 -10  -6   84.43   60.08
   8 -10   6    9.32   29.41
  -6  -9   8   43.44   35.68
   8  -9   6  135.43   72.16
  -8  -9  -6  130.26   68.16
   8  -8   6  119.74   66.09
  -6  -8   8   20.43   20.87
  -8  -8  -6   64.58   47.19
  -6  -7   8   51.05   40.93
  -8  -7  -6    0.16   17.07
  -8  -6  -6  183.96   75.11
  -6  -6   8   99.85   50.48
   8  -6   6   27.11   35.05
  -6  -5   8   -3.12   15.67
   8  -5   6    3.48    5.46
  -6  -4   8  116.67   57.14
   8  -4   6   56.33   38.02
  -8  -4  -6   44.98   33.80
   6  -3  -8   60.12   25.57
  -6  -3   8   81.79   47.02
  -8  -3  -6   17.65   21.17
   6  -2  -8   50.26   21.45
  -6  -2   8  223.45   69.51
   8  -2   6  237.66   72.67
  -8  -2  -6  178.87   57.41
   8  -1   6   58.78   34.38
  -6  -1   8   23.42   21.47
   6  -1  -8  114.70   29.20
   8  -1   6   56.04   35.10
  -6   0   8   72.75   39.97
   6   0  -8   29.84    9.57
   8   0   6  287.49   82.71
  -8   0  -6  152.83   50.65
   8   0   6  226.81   67.95
  -8   0  -6  217.64   36.14
  -6   1   8  120.97   31.42
   8   1   6  427.16  102.69
  -8   1  -6   45.49   25.17
  -6   1   8  100.75   41.99
   8   1   6  369.64   88.91
  -8   1  -6   70.93   27.01
  -8   2  -6  304.56   64.79
   8   2   6  206.79   67.59
   6   2  -8  192.32   40.73
   8   2   6  282.27   80.69
  -8   2  -6  182.34   45.50
  -6   2   8   40.26   22.86
  -8   3  -6  158.12   32.02
   6   3  -8   46.59   20.03
  -6   3   8   78.09   33.31
  -8   3  -6  163.38   39.13
   8   3   6   32.20   32.51
   8   3   6   26.53   22.74
   8   4   6   43.77   34.46
   6   4  -8   69.46   28.14
  -8   4  -6   46.54   34.63
  -8   4  -6   20.54   11.09
  -8   4  -6   18.71   10.06
  -8   5  -6    1.71    4.07
  -8   5  -6    0.83    3.29
  -8   6  -6   43.69   39.28
  -6   6   8  104.97   58.42
  -8   7  -6  442.86  124.42
  -6   7   8  286.79  102.02
  -8   8  -6  107.25   65.91
  -6   8   8   50.68   41.76
   8   8   6   90.56   64.11
  -6   9   8   93.98   58.25
  -8   9  -6  165.04   83.70
   8   9   6  126.88   70.28
   8  10   6   78.62   67.63
  -8  10  -6    0.19   18.20
  -6  10   8   66.22   57.32
   8  11   6   35.01   40.45
  -8  11  -6   31.98   44.02
  -6  11   8  152.85  100.14
  -6  12   8  -11.28   40.15
   8  12   6   -8.26   19.24
  -8  12  -6  143.81   89.92
   6  12  -8  152.14   92.30
   8  13   6   15.14    8.30
  -8  13  -6   47.18   51.74
   6  13  -8   27.51   51.29
   6  14  -8   73.56   66.58
   8  14   6   47.20   54.88
  -8  14  -6   25.15   50.69
  -5 -15   8   93.22   60.32
   8 -15   5   67.80   58.40
   5 -15  -8   23.02   31.17
  -8 -15  -5   59.78   57.91
  -5 -14   8   14.43   15.34
   8 -14   5  -10.81   26.61
   5 -14  -8    1.70   15.02
  -8 -14  -5   20.04   26.20
  -5 -13   8   13.00   21.09
   8 -13   5   72.09   53.75
   5 -13  -8   63.79   51.93
  -8 -13  -5    6.72   10.08
  -5 -12   8  138.08   68.36
   8 -12   5  121.52   75.53
  -8 -12  -5  120.26   76.06
   5 -12  -8   48.50   44.30
  -5 -11   8  189.16   80.34
  -8 -11  -5   60.79   52.45
   8 -11   5  163.19   87.67
   5 -11  -8   25.49   28.97
   8 -10   5   14.30    4.80
   5 -10  -8    8.62   17.50
  -8 -10  -5   38.75   41.01
  -5  -9   8  115.41   64.95
   8  -9   5  231.86   97.81
  -8  -9  -5  108.39   63.43
   8  -8   5  699.53  152.89
  -8  -8  -5  472.59  126.09
  -5  -7   8  365.31   99.77
   8  -7   5  245.62   88.07
  -8  -7  -5   81.60   52.99
  -5  -6   8  202.99   71.29
  -8  -6  -5   49.61   39.74
  -5  -5   8    9.98   17.95
   8  -5   5  257.34   87.09
  -8  -5  -5  179.85   70.44
  -5  -4   8   60.68   39.10
  -8  -4  -5   26.98   23.48
  -5  -3   8  117.24   56.38
  -8  -3  -5   40.38   30.49
  -8  -2  -5   99.53   42.80
   8  -2   5  176.54   67.59
  -5  -1   8  183.23   63.83
  -8  -1  -5  283.07   69.60
   8  -1   5  149.03   53.80
   8  -1   5  159.32   57.26
   8   0   5  152.82   54.84
   5   0  -8   51.32   23.65
  -5   0   8   61.01   22.80
  -5   0   8   54.25   33.80
  -8   0  -5   83.93   36.67
  -8   0  -5  147.35   31.11
   8   0   5  113.05   47.53
   8   1   5  391.48   91.54
  -5   1   8  447.35   64.91
  -5   1   8  418.52   83.90
   8   1   5  373.07   82.59
  -8   1  -5   76.50   29.81
   5   1  -8  177.06   45.36
  -8   1  -5  127.67   35.12
  -5   2   8   74.73   30.87
   5   2  -8  242.79   50.47
   8   2   5  107.86   43.96
  -8   2  -5   97.10   33.11
   8   2   5  119.25   48.64
  -8   2  -5  173.95   48.14
   5   3  -8   87.65   32.58
  -8   3  -5   98.65   27.09
   8   3   5   72.10   41.57
   8   3   5   45.87   28.17
  -8   4  -5  165.76   25.97
  -5   4   8  180.84   61.35
   5   4  -8   42.67   22.10
   8   4   5   77.99   49.78
  -8   4  -5  183.17   28.14
   8   5   5  192.74   70.17
  -5   5   8    6.46   22.95
  -8   5  -5  196.64   68.43
  -5   6   8    8.75   18.06
   8   6   5   39.15   30.16
  -5   7   8   39.69   40.65
   8   7   5  111.29   65.63
  -8   8  -5  667.01  155.72
   8   8   5  589.05  145.81
  -8   9  -5  198.67   85.56
   8   9   5  164.57   84.71
  -5   9   8   72.15   52.14
  -5  10   8   23.88   40.03
  -8  10  -5   33.39   48.45
   8  10   5   65.03   60.03
   8  11   5  115.60   86.56
  -8  11  -5  191.05   94.35
  -5  11   8   35.99   46.53
   5  11  -8  202.09  111.84
  -5  12   8   39.43   53.05
  -8  12  -5  111.02   71.97
   8  12   5  185.60  105.08
   5  12  -8  207.19  111.57
  -8  13  -5   73.25   65.28
   8  13   5   39.94   64.13
   5  13  -8   25.18   32.29
  -5  13   8  101.27   68.68
   5  14  -8   52.46   62.86
  -8  14  -5  -11.40   50.53
   8  14   5   50.62   56.26
  -5  14   8   31.22   69.73
   5  15  -8  124.76   90.35
  -8  15  -5    4.87   39.02
  -5  15   8  -22.60   68.44
   8  15   5   61.80   80.07
  -4 -15   8   -1.07   14.74
   8 -15   4   -0.99   30.23
   4 -15  -8   71.13   54.41
  -8 -15  -4   33.30   49.08
  -4 -14   8  125.15   66.88
   8 -14   4   57.10   51.90
   4 -14  -8   33.30   32.33
  -8 -14  -4  132.52   91.37
  -4 -13   8   25.87   22.29
   4 -13  -8   66.64   47.40
   8 -13   4   24.73   28.91
   8 -12   4   25.42   32.31
   4 -12  -8   21.75   23.23
  -4 -12   8   21.22   24.21
  -8 -12  -4   14.92   27.94
  -4 -11   8   12.25   14.47
   8 -11   4   62.32   46.15
   4 -11  -8  143.82   76.78
  -8 -11  -4   36.93   46.11
  -4 -10   8  179.45   74.57
   4 -10  -8  159.92   71.45
   8 -10   4  336.29  115.45
  -8 -10  -4  253.13  105.43
  -4  -9   8  128.33   62.58
   8  -9   4   53.90   50.94
  -8  -9  -4  137.16   77.78
   8  -8   4   32.50   22.21
  -8  -8  -4   44.22   45.85
  -4  -7   8  203.73   69.12
  -8  -7  -4   62.87   46.31
  -4  -6   8  172.62   62.81
  -8  -6  -4   87.12   47.96
  -4  -5   8  218.32   69.25
  -4  -5   8  179.26   28.05
   8  -5   4  168.21   68.50
  -4  -5   8   73.81   19.77
  -8  -4  -4   12.96   17.05
   8  -4   4   38.82   33.63
  -4  -3   8  256.08   72.62
   8  -3   4  386.70  107.75
  -8  -3  -4  192.16   63.31
  -4  -2   8  197.23   62.69
   8  -2   4  114.69   44.84
   8  -2   4  141.89   54.88
  -8  -2  -4   41.19   30.73
   8  -1   4   23.56   22.01
  -4  -1   8   58.78   32.38
   4  -1  -8  128.73   45.30
   8  -1   4   26.01   23.05
   8  -1   4   17.19   10.94
  -8  -1  -4   97.23   39.27
  -4   0   8 1318.78  151.45
   8   0   4   20.65   17.48
  -4   0   8 1483.58  124.34
   8   0   4   40.48   30.98
   8   0   4   27.76   14.52
  -8   0  -4   31.96   20.78
   4   0  -8 1138.76  136.32
  -4   1   8  169.30   44.18
   8   1   4  158.01   53.43
  -8   1  -4   42.04   19.41
   8   1   4  170.85   56.77
  -8   1  -4   27.15   16.60
   4   1  -8   68.35   31.52
  -4   2   8    6.56    3.08
   4   2  -8  166.57   47.16
   8   2   4   44.09   29.75
  -8   2  -4  170.59   46.80
   8   2   4   43.68   29.55
  -8   2  -4   99.95   32.82
  -8   3  -4  134.78   27.13
   4   3  -8  195.65   49.99
   8   3   4  208.71   66.25
  -4   3   8  113.00   41.68
   8   3   4  262.15   74.19
  -8   3  -4  267.77   65.24
   8   4   4    7.29   18.23
  -8   4  -4   36.68   28.13
  -8   5  -4  178.91   66.96
  -4   5   8   53.38   38.42
   8   6   4   91.29   51.03
  -4   6   8   99.82   56.81
   8   6   4   84.89   19.31
   8   7   4   48.23   33.15
   8   7   4   72.98   25.93
   8   8   4   39.18   40.36
   8   8   4   53.72   26.47
  -8   8  -4   29.10   30.14
  -8   9  -4   38.52   41.16
  -4   9   8    2.64   12.10
  -8  10  -4  289.79  116.07
  -4  10   8  262.20  115.08
   8  10   4  271.34  113.19
   4  11  -8    4.40   29.72
  -8  11  -4   43.35   41.29
   8  11   4   25.78   43.46
  -4  12   8   20.15    7.15
   8  12   4  -17.25   36.94
   4  12  -8   31.30   51.24
  -8  12  -4   40.68   41.11
   8  13   4  144.84   93.89
  -8  13  -4   48.52   48.66
   4  13  -8   89.47   79.21
  -4  13   8   51.99   58.55
  -8  14  -4   73.92   64.33
   8  14   4  133.45   89.12
   4  14  -8  175.84  105.17
  -4  14   8   25.66   61.82
  -4  14   8   14.82   31.92
  -8  15  -4   10.17   17.50
  -4  15   8  124.88   83.91
   4  15  -8    0.47   20.54
   8  15   4   34.01   47.60
  -4  15   8  108.76   81.30
  -3 -15   8   -0.76   20.30
   8 -15   3   48.70   45.74
   3 -15  -8   -3.52   23.26
  -8 -15  -3   36.74   45.35
  -3 -14   8   15.54   28.93
   8 -14   3    0.13    7.73
   3 -14  -8  -10.97   31.63
  -8 -14  -3   76.82   62.84
  -3 -13   8   20.99   14.50
   8 -13   3   69.46   55.12
   3 -13  -8   24.38   36.91
  -8 -13  -3   42.09   51.84
  -3 -12   8   50.75   42.37
   8 -12   3   76.61   51.32
   8 -11   3   47.63   41.21
   3 -11  -8   26.25   20.62
   3 -10  -8   41.13   44.85
  -3 -10   8  188.04   74.86
   8 -10   3  124.03   68.87
  -8 -10  -3  131.66   78.69
  -3  -9   8  249.78   85.06
  -8  -9  -3  119.07   72.89
   8  -9   3  148.32   74.47
   8  -8   3  505.47  136.18
  -8  -8  -3  414.12  126.79
  -3  -7   8  218.80   71.08
   8  -7   3  156.59   74.99
  -8  -7  -3  296.29  102.39
  -3  -6   8   83.16   39.54
  -3  -6   8   92.32   27.09
  -8  -6  -3   42.21   36.86
  -3  -5   8  583.52  116.22
  -3  -5   8  606.87   65.04
   8  -5   3  388.46  104.95
  -3  -4   8  140.20   57.98
  -8  -4  -3   44.18   35.85
  -8  -3  -3  152.25   60.20
   8  -3   3   53.99   36.70
   8  -2   3   41.46   24.99
   8  -2   3   46.21   32.82
  -8  -2  -3   51.47   30.79
  -3  -1   8  597.12  102.87
   8  -1   3  259.54   56.60
   8  -1   3  288.40   74.29
   8  -1   3  260.30   52.16
   8  -1   3  318.59   73.83
  -8  -1  -3  361.23   82.52
  -3  -1   8  735.42   95.43
   8   0   3  115.42   45.29
   8   0   3  103.17   30.94
  -3   0   8    1.72    6.78
  -3   0   8    4.78    3.22
   3   0  -8    5.13   16.23
   8   0   3  102.20   38.87
   3   0  -8    3.41    2.90
  -8   0  -3  158.19   50.95
   8   0   3  121.34   44.34
   8   1   3  409.83   86.06
  -3   1   8  214.61   51.15
   8   1   3  263.47   41.59
   3   1  -8  473.52   82.40
   8   1   3  405.39   88.44
  -8   1  -3  198.70   49.38
  -8   1  -3  348.93   60.63
   8   2   3   20.02    9.36
  -3   2   8  112.87   41.22
   8   2   3   36.34   23.82
   8   2   3   26.16   21.40
  -8   2  -3   63.84   23.91
  -8   2  -3   86.19   33.36
  -8   3  -3   17.74    8.48
   8   3   3  173.52   57.39
  -3   3   8  190.12   58.34
   8   3   3  227.67   65.08
  -8   3  -3   96.79   39.73
   8   4   3   37.66   25.84
   8   4   3   30.92   11.34
   8   4   3   37.01   11.78
   8   5   3  127.86   29.09
  -3   5   8  108.83   53.93
   8   5   3   90.20   43.47
   8   6   3   46.59   21.66
  -3   6   8   62.09   47.22
   8   6   3   33.40   32.20
   8   7   3  285.90   60.54
  -3   7   8   21.69   34.91
  -8   7  -3  120.87   61.04
   8   7   3  251.93   87.48
   8   8   3  545.51   94.52
  -3   8   8  541.95  150.55
   8   8   3  446.21  127.19
  -8   8  -3  439.65  122.13
   8   9   3   93.48   61.80
   8   9   3  123.12   50.25
  -3   9   8  101.27   66.52
  -8   9  -3  204.73   84.53
   3  10  -8  223.78  110.95
   8  10   3  170.74   68.66
  -8  10  -3  155.96   82.44
  -3  10   8   74.63   70.74
   8  10   3  154.06   82.85
  -8  11  -3   61.21   49.67
   8  11   3  152.98   84.35
  -3  11   8   16.93   40.10
  -8  12  -3   87.67   61.90
   3  12  -8   16.37   26.76
  -3  13   8   48.54   56.54
  -8  13  -3   33.99   47.68
   3  13  -8   57.14   37.45
  -3  13   8   20.83   22.36
   8  13   3   40.76   57.00
  -3  14   8    5.52   44.77
  -8  14  -3   -0.74   14.85
  -3  14   8    9.93   32.72
   3  14  -8   -5.58   40.95
   8  14   3   90.73   78.39
   8  15   3   46.43   59.83
  -3  15   8   14.55   13.43
  -8  15  -3   58.83   54.80
   3  15  -8   37.32   45.48
  -3  15   8  -19.06   31.73
  -2 -15   8   60.76   48.53
   2 -15  -8   22.98   24.22
   8 -15   2   17.17   26.09
  -8 -15  -2   61.77   56.23
  -2 -14   8  138.15   69.33
   8 -14   2   26.11   30.20
   2 -14  -8   43.15   46.87
  -8 -14  -2  141.35   81.73
   8 -13   2   58.03   39.75
  -8 -13  -2   33.88   35.15
   2 -13  -8   72.27   52.87
   2 -12  -8   53.21   40.57
  -2 -12   8   90.69   54.59
  -8 -12  -2   39.51   38.78
  -2 -11   8  262.93   86.86
   8 -11   2   75.47   48.14
   2 -11  -8   59.60   47.80
  -8 -11  -2  111.99   66.54
  -2 -10   8   57.70   40.13
   8 -10   2   14.71   14.42
   2 -10  -8   15.98   30.17
  -2  -9   8  289.23   85.62
   8  -9   2   49.78   43.99
   2  -9  -8  167.94   71.94
  -8  -9  -2  288.08  112.78
  -2  -8   8    3.37    9.73
   8  -8   2  123.71   63.44
  -8  -8  -2  174.32   85.68
  -2  -7   8  192.37   66.34
  -2  -7   8  189.80   50.17
  -8  -7  -2  118.82   66.14
  -2  -6   8   49.22   34.48
  -2  -6   8   40.17   19.16
  -2  -5   8  103.17   49.14
  -2  -5   8   78.52   24.31
   8  -5   2  139.24   60.00
  -2  -4   8   13.07   17.78
  -8  -4  -2   68.70   44.47
   8  -4   2   70.83   38.05
  -2  -4   8   11.22    7.93
  -2  -3   8   55.11   11.99
  -8  -3  -2   28.62   26.13
   8  -2   2  675.46  123.70
   8  -2   2  502.78   62.26
  -8  -2  -2  410.96   95.23
   8  -1   2  108.68   41.04
  -2  -1   8   67.88   28.69
  -2  -1   8   50.44   28.43
   2  -1  -8   62.13   17.18
   8  -1   2   73.44   28.39
   8  -1   2   84.85   39.30
   8   0   2  135.36   38.73
  -8   0  -2  136.52   42.11
   8   0   2  137.07   44.38
  -2   0   8   18.21   16.19
   8   0   2  152.70   51.40
   2   0  -8   18.17    8.16
   8   0   2  147.76   46.81
   8   1   2  490.41   87.82
  -2   1   8   72.11   32.97
   2   1  -8   36.23    9.97
   8   1   2  520.40   96.89
  -8   1  -2   66.49   28.45
   8   1   2  469.62   63.57
   8   2   2  335.71   70.24
   8   2   2  387.25   77.11
  -2   2   8   33.07   22.56
  -8   2  -2  693.93   97.64
   8   2   2  381.31   49.58
  -8   2  -2  612.32   66.20
  -8   3  -2  127.43   23.10
   8   3   2   11.24   18.86
  -2   3   8  183.41   57.45
   8   3   2   15.64   17.47
  -8   3  -2  286.22   68.12
  -8   4  -2   41.38   26.60
   8   4   2   93.65   41.74
  -2   4   8  158.14   57.45
   8   5   2  333.53   85.41
   8   5   2  459.23   77.14
  -2   5   8  328.87   96.93
  -8   5  -2  172.67   58.58
   8   6   2  437.43   75.67
   8   6   2  356.93   92.43
  -2   6   8  215.11   84.65
  -8   6  -2  188.44   68.65
   8   7   2   94.15   53.10
   8   7   2  104.76   40.63
  -2   8   8  231.99  105.09
   8   8   2  135.07   50.97
   8   8   2  111.17   58.58
  -8   8  -2  167.93   71.29
  -8   9  -2   42.22   41.71
   8   9   2  359.04   91.16
  -2   9   8  228.32  103.00
   8   9   2  305.22  106.09
   8  10   2  419.27  135.31
  -8  10  -2    3.76   20.64
   2  10  -8   77.26   53.23
  -2  10   8    9.89   19.37
   8  10   2  438.47  106.65
  -2  11   8  109.52   72.58
  -8  11  -2   80.77   57.19
   8  11   2  120.29   71.78
   8  11   2  111.38   59.49
   2  11  -8  273.81  116.18
   8  12   2   28.72   20.59
  -2  12   8   29.41   23.84
   2  12  -8   88.59   76.99
  -2  12   8   37.42   38.77
  -8  13  -2   83.49   64.01
   8  13   2   24.96   31.57
  -2  13   8   97.27   83.89
  -2  13   8   60.22   56.38
  -8  14  -2   -7.59   37.17
   8  14   2  170.30  105.99
  -2  14   8   35.96   33.05
   2  14  -8  126.32   79.15
  -2  14   8   25.71   19.70
  -8  15  -2   -2.28   20.65
   2  15  -8   87.09   64.55
  -2  15   8   20.11   43.45
  -2  15   8   27.26   37.32
   8  15   2   97.47   84.46
  -1 -15   8  103.73   58.03
   1 -15  -8    3.66   11.11
   8 -15   1   57.17   53.00
  -8 -15  -1   69.71   63.02
  -1 -14   8   -8.82   28.07
   1 -14  -8   12.04   26.71
  -8 -14  -1   10.97   17.18
  -1 -13   8   22.58   27.88
   8 -13   1   44.33   39.26
   1 -13  -8   72.33   50.08
  -8 -13  -1  103.86   71.52
   1 -12  -8   13.91   39.39
   8 -12   1   46.96   42.53
  -8 -12  -1   36.66   39.69
   8 -11   1   90.90   63.25
  -1 -11   8  137.30   63.46
   1 -11  -8   76.02   51.36
  -8 -11  -1   88.44   66.94
   1 -10  -8   25.22   36.91
  -8 -10  -1    2.62   14.72
  -1 -10   8   40.97   32.43
  -1  -9   8   37.70   31.16
  -1  -9   8   34.17   21.28
   8  -9   1  135.97   66.43
   1  -9  -8  177.32   76.86
  -8  -9  -1   50.04   40.58
  -1  -8   8  486.39  103.91
  -1  -8   8  436.08   83.80
   8  -8   1   42.76   34.52
   1  -8  -8   18.31   22.87
  -8  -8  -1   39.46   33.14
  -1  -7   8  170.90   59.43
  -1  -7   8  150.21   47.54
   8  -7   1   61.85   38.59
  -1  -6   8  136.07   56.48
  -1  -6   8  126.22   40.12
   8  -6   1   -1.49    6.39
  -8  -6  -1   96.14   53.55
  -1  -5   8  526.80  100.26
  -1  -5   8  494.92   70.32
   8  -5   1   93.90   45.98
  -8  -5  -1   78.88   44.47
  -1  -4   8  202.45   60.81
  -1  -4   8  218.49   43.95
   8  -4   1   40.73   29.38
  -8  -4  -1  301.13   86.67
  -1  -3   8  250.30   65.20
   8  -3   1  200.05   67.27
  -1  -3   8  217.00   33.06
   8  -3   1  106.77   23.74
  -1  -2   8   62.61   31.31
   8  -2   1  446.42  101.02
   8  -2   1  270.91   47.33
  -8  -2  -1  288.75   76.42
   1  -2  -8   39.66   18.50
  -1  -1   8   89.49   34.15
   8  -1   1  576.01   98.68
   1  -1  -8  139.34   28.69
   8  -1   1  467.11   71.92
  -8  -1  -1  220.48   66.71
   8  -1   1  639.24   94.38
   8   0   1  388.20   75.89
  -1   0   8   48.79   26.41
   1   0  -8   34.02   13.56
   8   0   1  347.04   68.59
  -8   0  -1  359.87   63.33
   8   0   1  432.11   76.05
   8   0   1  367.42   63.61
   8   1   1  183.60   46.80
   1   1  -8  159.60   29.33
   8   1   1  175.77   54.29
  -1   1   8   81.61   36.10
   8   1   1  160.67   39.74
   8   2   1  296.86   59.96
   8   2   1  333.12   55.12
   8   2   1  307.52   66.48
  -8   2  -1  374.98   74.44
  -8   2  -1  303.30   43.65
  -8   3  -1  200.69   31.72
   8   3   1  414.66   80.28
  -1   3   8  480.47   92.30
   8   3   1  457.72   85.14
  -8   3  -1  222.92   60.52
  -8   4  -1   77.88   38.16
  -1   4   8   71.50   41.82
  -1   5   8  169.49   70.64
  -8   5  -1  131.05   53.77
   8   5   1   81.01   40.51
   8   6   1  109.88   51.66
  -8   6  -1    3.28    9.10
  -1   6   8   26.74   30.73
   8   6   1  139.11   51.83
  -8   7  -1   71.00   44.72
   8   7   1  435.61   95.45
   8   7   1  384.16  105.54
  -1   7   8  366.60  120.85
  -1   8   8    9.15   16.00
  -8   8  -1   55.00   38.36
   8   8   1   37.79   39.85
   8   8   1   41.78   25.07
   8   9   1   55.50   35.11
   1   9  -8   63.53   60.16
  -8   9  -1  196.68   77.95
   8   9   1   65.06   47.65
  -8  10  -1  114.55   64.41
   1  10  -8   74.12   57.71
   8  10   1   22.08   26.72
  -1  10   8   25.67   37.68
   8  10   1   24.81   26.03
  -8  11  -1   87.37   56.83
   8  11   1   77.46   64.30
  -1  11   8  116.13   85.44
   8  11   1   41.93   40.37
   1  11  -8   86.73   76.00
  -8  12  -1    9.95   14.80
   8  12   1   36.23   38.69
   8  12   1   25.12   47.93
  -1  12   8   -7.55   35.50
  -1  12   8   -9.37   14.81
  -1  13   8   81.34   80.87
  -8  13  -1   24.13   32.24
   8  13   1  100.25   65.93
   1  13  -8   14.50   17.87
   8  13   1   92.62   67.80
  -1  13   8   62.16   42.63
   8  14   1   -4.78   30.54
  -1  14   8    9.58   14.99
   1  14  -8    1.17   18.71
  -1  14   8    6.94   14.06
   1  15  -8   50.43   50.86
  -8  15  -1   42.50   42.47
  -1  15   8   -4.73   20.13
   8  15   1   48.46   63.35
  -1  15   8    7.56   33.34
   8 -16   0   16.36   17.02
   0 -16  -8    7.10   19.15
   0 -15  -8   15.05   21.38
   8 -15   0   88.47   70.08
  -8 -15   0  -22.77   50.04
   0 -14   8   28.67   27.08
   0 -14  -8   17.23   29.43
   8 -14   0   58.81   46.83
   0 -13   8   53.47   40.71
   0 -13  -8   29.02   25.55
   8 -13   0   14.88   36.45
  -8 -13   0   48.03   50.15
   0 -12   8   16.50   28.17
   0 -12   8   29.92   27.71
   8 -12   0   42.35   39.95
   0 -12  -8   -1.94   28.13
  -8 -12   0   42.16   52.90
   0 -11  -8    3.38   15.09
   0 -11   8   27.98   29.92
   0 -11   8   18.20   21.43
  -8 -11   0    7.44   21.68
   0 -10   8  110.30   52.98
   0 -10   8  111.35   54.31
   8 -10   0   99.58   60.18
   0 -10  -8   83.51   54.34
  -8 -10   0   25.41   21.01
   0  -9   8  135.77   56.23
   0  -9   8  122.29   47.40
   8  -9   0   42.45   34.71
   0  -9  -8  116.30   62.37
  -8  -9   0  224.05   92.64
   0  -8   8  486.72  104.13
   0  -8   8  429.42   87.07
   8  -8   0  149.20   64.26
   0  -8  -8  414.36  113.80
   8  -8   0   49.81   14.83
  -8  -8   0  136.44   68.80
   8  -7   0   85.12   17.37
   0  -7   8   16.97   25.09
   0  -7   8   18.06   19.63
   0  -6   8   86.80   40.76
   8  -6   0    9.59   10.97
   0  -6   8   94.58   39.35
   8  -6   0    5.62    4.55
   8  -6   0    0.15    1.85
  -8  -6   0   76.73   47.74
   0  -5   8   57.22   30.22
   0  -5   8   58.24   26.93
   8  -5   0   65.13   17.13
  -8  -5   0  134.62   63.47
  -8  -4   0  625.17  132.32
   0  -4   8 1428.75  155.59
   0  -4   8 1740.66  144.42
   8  -4   0   49.32   37.53
   8  -4   0   14.17    9.32
   0  -3   8    1.26    7.59
   8  -3   0   12.01   22.51
   0  -3   8    4.54    7.71
   8  -3   0    0.75    6.26
   0  -2   8   25.81   20.07
  -8  -2   0  287.37   68.86
   8  -2   0  269.77   73.51
   8  -2   0  250.94   57.20
   0  -2   8   15.17    8.91
   0  -2  -8   15.66   12.55
  -8  -2   0  214.96   63.90
  -8  -1   0   26.97   19.32
   0  -1   8   41.33   24.24
   8  -1   0 1204.20  143.28
   8  -1   0 1182.02  132.91
   0  -1  -8   37.03   18.37
  -8  -1   0   27.30   19.48
  -8   0   0  605.01   88.12
  -8   0   0  553.37   85.38
   8   0   0  511.42   87.37
   8   0   0  544.54   95.62
   8   0   0  572.94   84.56
  -8   1   0 1059.77  116.16
   8   1   0   28.06   17.73
   0   1  -8   44.96   18.55
   8   1   0   27.89   16.93
   0   1   8   42.75   26.72
  -8   1   0 1176.51  109.04
   8   1   0   33.38   20.07
  -8   2   0  272.62   63.73
  -8   2   0  255.94   45.40
   8   2   0  215.27   46.42
   0   2   8   14.32   11.66
   0   2  -8   15.77   10.51
   8   2   0  222.91   54.92
   8   3   0 1057.71  117.87
  -8   3   0   10.16    7.55
  -8   3   0    3.07    3.23
   8   3   0 1121.04  129.28
   0   3   8    8.98   12.78
  -8   4   0   28.26   21.95
   8   4   0  385.70   71.32
   0   5   8   71.08   48.85
  -8   5   0  217.90   72.13
   8   5   0  100.13   43.94
  -8   6   0   12.96   12.63
   8   6   0   86.72   47.69
   0   6   8   78.67   51.49
  -8   7   0  202.26   76.99
   0   7   8   15.30   25.40
   8   8   0  173.17   71.28
   0   8   8  433.68  138.46
   8   8   0  180.06   69.20
   0   8  -8  528.85  157.62
  -8   8   0  167.59   72.12
   0   9   8  126.18   74.92
  -8   9   0   61.43   50.03
   8   9   0  301.40  104.17
   8   9   0  305.93   93.39
   0   9  -8  122.20   73.79
   0  10   8  115.89   77.88
   8  10   0   23.09   34.53
  -8  10   0  110.54   61.22
   0  10  -8   92.35   61.68
   8  10   0   38.60   38.20
   8  11   0    1.60   10.33
   0  11   8   38.18   60.15
   0  11   8   22.49   24.49
   0  11  -8    1.57   25.62
   8  11   0   -1.38   12.90
   0  12  -8  -10.63   16.71
  -8  12   0   45.95   39.37
   8  12   0   33.13   11.82
   0  12   8   30.32   44.34
   8  12   0   48.72   45.12
   0  12   8   16.04   22.81
  -8  13   0   16.88   26.01
   0  13  -8   74.87   71.71
   8  13   0   63.74   51.85
   8  13   0   54.88   51.00
   0  13   8   36.67   37.75
   0  13   8   53.40   42.07
   0  14  -8   71.95   70.65
  -8  14   0   33.42   41.66
   8  14   0  341.62  131.00
   8  14   0  389.82  149.02
   0  14   8    2.46   11.12
   0  14   8   10.43   18.30
  -8  15   0   92.82   65.55
   8  15   0  -19.21   43.74
   0  15   8    0.73   19.27
   0  15  -8   22.51   32.23
   0  15   8   15.69   21.16
  -8  16   0    5.55   18.72
   8  16   0   72.67   67.91
   0  16  -8   12.14   30.68
   0  16   8   -2.61   56.37
   0  16   8    4.39   17.92
   8 -15  -1   53.26   46.62
   1 -15   8  -13.21   20.58
  -1 -15  -8   34.06   24.84
  -8 -15   1   44.76   60.91
   1 -14   8   16.76   23.59
  -1 -14  -8   20.97   32.05
  -8 -14   1    4.54   25.51
   8 -13  -1   38.48   34.19
   1 -13   8   61.05   43.04
  -1 -13  -8   11.69   16.83
   1 -13   8   62.64   40.53
  -8 -13   1  130.56   84.66
   1 -12   8   -7.12   15.64
   8 -12  -1   28.16   10.43
   1 -12   8   -7.42   23.90
  -8 -12   1   40.04   43.42
   1 -11   8   74.58   45.60
   8 -11  -1   78.04   52.12
   1 -11   8   72.29   47.62
  -1 -11  -8   90.94   60.81
  -8 -11   1   63.84   50.59
   1 -10   8   21.50   24.35
   1 -10   8   16.82    2.36
  -1 -10  -8   39.74   32.14
  -8 -10   1   28.81   27.74
   1  -9   8  247.43   73.79
   1  -9   8  207.75   68.53
   8  -9  -1  164.84   67.37
  -1  -9  -8   52.25   44.48
   8  -9  -1  114.34   33.55
  -8  -9   1   81.60   62.14
   1  -8   8   17.22   16.94
   8  -8  -1   54.81   39.48
   1  -8   8    4.73   14.00
  -8  -8   1   40.20   38.14
   8  -8  -1   34.41   17.96
   1  -7   8  367.53   82.47
   8  -7  -1   27.44   11.73
   1  -7   8  389.88   90.23
   8  -7  -1   54.06   42.64
  -1  -7  -8  125.63   61.64
   8  -7  -1   46.05   18.19
  -8  -7   1  432.00  125.74
   1  -6   8   31.44   23.91
   8  -6  -1   -5.61   21.47
   1  -6   8   40.98   26.93
   8  -6  -1    2.92    3.38
   1  -5   8  164.40   51.63
   1  -5   8  191.92   53.64
   8  -5  -1  122.35   59.64
   8  -5  -1   49.78   18.40
  -8  -5   1   84.12   45.80
   8  -4  -1   53.25   21.28
   1  -4   8   62.90   29.16
   8  -4  -1   78.52   43.17
   1  -4   8  104.55   39.73
   8  -3  -1  224.88   69.05
   8  -3  -1  180.55   43.35
   1  -2   8   72.45   35.93
   8  -2  -1  364.82   82.87
  -8  -2   1  336.59   62.51
   1  -2   8   57.32   24.09
   8  -2  -1  381.95   74.85
  -8  -2   1  321.22   74.59
   1  -1   8   97.74   38.88
   8  -1  -1  606.40  103.32
  -8  -1   1  207.03   48.58
   1  -1   8   82.27   26.59
   8  -1  -1  572.22   95.58
  -8  -1   1  170.02   50.87
  -8   0   1  429.03   62.98
   8   0  -1  384.70   73.04
   1   0   8   53.57   30.67
  -1   0  -8   37.45   18.51
  -8   0   1  419.89   73.65
  -8   1   1  660.11   87.21
  -8   1   1  602.70   76.46
  -1   1  -8  164.15   41.70
   8   1  -1  181.01   48.10
   1   1   8   82.63   39.06
   8   1  -1  202.61   41.62
   8   2  -1  282.30   49.30
   1   2   8   66.25   40.34
  -8   2   1  363.97   57.95
  -1   2  -8   46.24   22.42
   8   2  -1  298.94   60.07
  -8   2   1  371.67   64.59
  -8   3   1  194.08   37.88
   8   3  -1  429.33   69.27
  -1   3  -8  428.32   69.66
   1   3   8  215.89   68.62
   8   3  -1  477.11   80.86
  -8   3   1  216.81   53.87
   1   4   8  129.09   57.91
  -8   4   1   52.07   34.25
  -8   5   1   86.61   46.18
   8   5  -1   91.35   40.94
   8   6  -1   99.12   42.97
   1   6   8  103.75   61.60
  -8   6   1   -1.68    8.40
  -8   7   1   63.13   43.73
   8   7  -1  351.73   95.79
   1   7   8  142.14   79.69
  -1   7  -8  315.09  116.60
  -8   8   1   49.50   41.15
   8   8  -1   72.16   44.95
  -1   8  -8   22.69   12.75
   8   8  -1   71.16   49.13
  -8   9   1  180.85   79.41
   1   9   8   23.82   20.30
   8   9  -1   79.69   52.07
  -1   9  -8  207.13   98.67
   8   9  -1   59.70   35.81
   1  10   8   34.39   43.90
  -8  10   1  153.97   76.25
   8  10  -1   34.56   32.53
  -1  10  -8   37.07   47.13
   8  10  -1   24.40   29.86
  -8  11   1  105.79   63.21
   1  11   8  115.81   92.29
   8  11  -1   91.84   58.46
  -1  11  -8   84.32   59.92
   8  11  -1  101.42   62.36
   1  11   8   99.04   51.27
  -8  12   1   30.43   26.14
   8  12  -1   30.63   24.23
   1  12   8  215.73  130.85
   8  12  -1   35.59   30.33
  -1  12  -8  -10.85   24.51
   1  12   8  150.54   69.63
  -8  13   1   23.60   32.30
   1  13   8   39.54   76.71
   8  13  -1  143.25   83.02
   8  13  -1  118.99   68.11
  -1  13  -8   93.89   76.94
   1  13   8    9.39   25.40
   1  14   8    5.16   43.63
   8  14  -1   -1.05   27.16
   8  14  -1    0.94   26.74
  -1  14  -8   13.98   18.66
   1  14   8   -6.14   31.42
  -8  15   1   63.89   51.69
   1  15   8   87.50   96.54
   8  15  -1   64.44   64.81
   8  15  -1   61.58   63.29
  -1  15  -8   15.64   40.54
   1  15   8   41.88   40.25
  -8 -15   2   71.79   58.30
   2 -15   8   37.60   38.57
  -2 -15  -8   86.15   65.83
  -8 -14   2  139.91   76.08
   2 -14   8   42.08   42.50
  -2 -14  -8   78.74   52.30
  -8 -13   2   33.60   39.35
   2 -13   8   62.92   47.30
  -8 -12   2   33.43   28.21
   2 -12   8   54.22   43.10
  -2 -12  -8   76.98   58.42
   2 -12   8   43.88   35.44
  -8 -11   2   91.50   57.48
   2 -11   8  109.86   50.33
   8 -11  -2   59.85   37.70
   2 -11   8   64.97   38.54
  -2 -11  -8  187.46   85.74
   2 -10   8   24.39   23.84
   8 -10  -2   16.77   20.14
   2 -10   8   28.14   29.50
  -2 -10  -8   33.25   21.03
   2  -9   8  239.50   73.39
   2  -9   8  224.10   75.84
   8  -9  -2   34.86   32.17
  -2  -9  -8  237.80   92.95
   8  -9  -2   33.70   20.40
  -8  -9   2  302.83   95.52
  -8  -8   2   78.21   46.76
   2  -8   8  214.06   60.65
   2  -8   8  234.17   74.84
   8  -8  -2  128.66   56.02
   8  -8  -2  113.90   37.57
  -2  -8  -8   12.00   22.52
  -8  -7   2   88.24   43.99
   8  -7  -2  272.63   47.33
   2  -7   8  316.96   70.97
   8  -7  -2  472.18  111.52
   2  -7   8  364.36   94.54
  -2  -7  -8  167.21   73.27
   8  -6  -2  123.38   32.48
  -2  -6  -8   24.85   24.26
   2  -6   8  216.59   57.92
   8  -6  -2  153.47   60.97
   2  -6   8  214.36   64.55
   2  -5   8  264.34   60.77
   2  -5   8  343.32   78.70
   8  -5  -2  160.07   59.55
  -8  -5   2  390.61   95.27
   8  -5  -2  105.25   28.82
   8  -4  -2   39.34   17.88
   8  -4  -2   50.99   33.65
  -8  -4   2  101.38   47.94
   8  -3  -2  274.75   72.44
   2  -3   8  217.33   51.87
   8  -3  -2  250.09   54.42
   2  -2   8   38.21   25.05
   8  -2  -2  668.04  111.83
   2  -2   8   34.45   19.98
   8  -2  -2  588.74   86.55
  -8  -2   2  381.62   79.71
  -8  -1   2  482.36   62.37
   2  -1   8   78.40   36.66
   8  -1  -2   74.96   36.07
   2  -1   8   71.97   24.79
  -8  -1   2  475.84   82.78
  -8   0   2  161.64   48.68
  -8   0   2  154.74   32.76
   8   0  -2  147.79   43.60
   2   0   8   13.80   16.96
   2   0   8   16.36   12.70
  -8   1   2   94.99   34.18
  -8   1   2   81.90   24.56
   2   1   8   41.71   27.51
  -8   2   2  691.23   89.66
   8   2  -2  387.18   64.94
  -8   2   2  604.96   72.89
   8   2  -2  408.92   52.07
   8   3  -2   30.69   15.31
   8   3  -2   26.69   18.24
   8   4  -2   84.09   31.41
   2   4   8   13.50   20.47
   2   5   8   69.95   43.01
  -8   5   2  137.19   58.51
   2   6   8   40.78   34.64
  -2   6  -8  235.19   95.51
  -8   6   2  249.91   83.77
   8   6  -2  384.00   88.31
   2   7   8  199.80   89.17
   8   7  -2  118.75   49.51
  -2   7  -8  280.10  108.39
   8   8  -2  162.04   64.57
   2   8   8   -6.92   30.38
  -2   8  -8  212.21   92.25
  -8   8   2  134.80   66.77
  -8   9   2   38.86   42.51
  -2   9  -8  195.65   91.56
   8   9  -2  276.15   91.61
   8   9  -2  430.29  126.27
   2   9   8  241.40  105.19
  -8  10   2    8.56   10.27
   8  10  -2  487.68  135.43
  -2  10  -8    3.94   12.82
   8  10  -2  426.81  120.47
   2  10   8   37.22   33.38
  -8  11   2  111.25   67.19
  -2  11  -8   84.03   62.56
   2  11   8  224.38   80.11
   2  11   8  272.27  130.28
   8  11  -2  147.79   74.72
   2  12   8   59.85   54.14
  -2  12  -8   71.76   66.73
   8  12  -2   47.50   41.80
  -8  12   2  245.25  106.00
   2  12   8   56.43   39.94
  -8  13   2   67.22   54.24
   8  13  -2   37.50   34.02
  -2  13  -8   63.89   55.26
   2  13   8  212.70   90.11
  -8  14   2   12.59   28.59
   2  14   8  131.16  106.68
  -2  14  -8   61.50   59.14
   8  14  -2  158.45   90.53
   2  14   8  110.12   67.01
  -8  15   2   15.02   31.99
   2  15   8   66.50   73.46
  -2  15  -8   50.63   65.46
   8  15  -2   82.03   80.24
   3 -15   8   -8.21   19.84
  -3 -15  -8    7.57   12.84
  -8 -15   3   16.63   27.05
  -3 -14  -8   15.95   14.22
   3 -14   8   -3.33   20.29
  -8 -13   3   13.24   17.83
  -3 -13  -8   22.52   35.34
   3 -13   8   21.55   30.25
  -8 -12   3  225.61   91.18
  -3 -12  -8   27.81   32.13
  -8 -11   3  153.01   69.78
   3 -11   8   25.95   26.13
   3 -11   8    4.38    5.92
  -3 -11  -8  207.33   92.16
  -8 -10   3  153.34   70.97
   3 -10   8   71.88   36.78
   8 -10  -3  119.87   68.84
  -3 -10  -8  138.38   70.98
   3 -10   8   63.43   41.77
   8 -10  -3  115.89   47.22
   3  -9   8   98.16   40.20
   8  -9  -3  166.58   69.51
   3  -9   8  118.53   60.69
   8  -9  -3  119.16   44.95
  -8  -9   3   95.76   56.69
  -3  -9  -8  201.15   85.09
   3  -8   8  548.02   92.21
   8  -8  -3  337.34  100.98
   3  -8   8  682.64  143.31
  -8  -8   3  470.29  119.31
   3  -7   8   23.25   16.22
   3  -7   8   14.55   15.57
  -8  -6   3   51.61   35.21
   3  -6   8   59.12   27.09
   3  -6   8   69.61   38.42
  -3  -6  -8   72.30   45.60
  -8  -5   3  135.24   55.29
   8  -5  -3  350.58   88.90
  -3  -5  -8  419.04  105.20
   3  -5   8  109.46   49.79
  -8  -4   3   43.49   30.98
  -3  -4  -8  107.27   37.87
   3  -3   8  218.18   56.10
   8  -3  -3   88.44   37.84
  -3  -3  -8  257.98   58.33
  -8  -3   3  217.51   63.93
  -8  -2   3   30.91   20.84
   3  -2   8  125.74   50.60
   3  -2   8  130.65   40.56
   8  -2  -3  103.36   42.07
  -8  -1   3  397.73   85.17
   8  -1  -3  352.52   76.20
   3  -1   8  211.31   51.24
   3  -1   8  223.07   64.42
  -8   0   3  154.65   48.56
   8   0  -3  161.91   44.83
   3   0   8    8.54   23.67
   3   0   8   -0.49    4.52
  -8   0   3  110.75   21.72
  -8   1   3  279.60   38.23
  -8   1   3  363.11   74.04
   8   1  -3  401.83   68.93
  -8   2   3   57.41   21.92
  -8   2   3   55.20   26.00
   8   2  -3   64.27   26.52
   8   3  -3  164.67   29.39
  -8   3   3   57.42   25.88
   3   3   8  233.55   76.58
   3   4   8  107.72   50.50
   8   4  -3   41.69   19.27
  -3   5  -8   78.46   50.28
   8   5  -3  134.01   42.04
   8   6  -3   40.40   29.41
  -3   6  -8   38.76   40.04
   3   6   8   64.23   54.50
   3   7   8  186.95   85.41
   8   7  -3  296.27   78.38
  -3   7  -8   17.72   26.30
  -8   7   3  135.09   65.55
  -3   8  -8  463.06  126.40
   8   8  -3  428.86   99.59
  -8   8   3  491.97  126.55
  -8   9   3  182.42   80.75
   3   9   8  216.54  103.03
  -3   9  -8   97.35   60.17
  -8  10   3  131.60   71.51
   3  10   8  136.74   78.64
  -3  10  -8   46.95   55.54
   8  10  -3  148.11   76.13
  -8  11   3   38.67   34.03
   8  11  -3  186.22   92.16
  -3  11  -8   -3.84   20.91
   3  11   8  285.97  127.68
  -8  12   3   96.83   64.53
   3  12   8   39.56   43.89
   3  12   8   31.24   25.28
  -8  13   3   59.24   54.88
  -3  13  -8   51.42   56.58
   8  13  -3   36.26   46.19
   3  13   8   21.38   21.45
   3  13   8   12.49   15.60
  -3  14  -8   18.53   46.09
   8  14  -3  120.21   88.45
  -8  14   3    2.76   24.19
   3  14   8   14.06   28.14
  -8  15   3   26.57   47.81
  -3  15  -8   -1.20   23.30
   8  15  -3   37.35   45.49
   3  15   8    5.58   34.31
  -8 -15   4   49.54   51.07
   4 -15   8  113.26   70.42
  -4 -15  -8  -15.78   45.32
  -8 -14   4  160.95   83.35
   4 -14   8    1.69    1.68
  -4 -14  -8  120.72   74.45
  -4 -13  -8   47.86   47.70
   4 -13   8   20.59    6.40
  -8 -12   4    4.18   14.33
   4 -12   8   23.77   27.19
  -4 -12  -8   20.60   25.60
  -8 -11   4   31.26   35.71
  -4 -11  -8    0.45    5.12
   4 -10   8  277.62   64.65
   4 -10   8  308.09  108.63
   8 -10  -4  235.74   71.62
  -4 -10  -8  131.12   67.86
  -8 -10   4  271.54   98.24
   4  -9   8   13.98   13.09
  -8  -9   4  149.47   67.46
   4  -9   8   14.61   24.28
  -4  -9  -8  106.25   62.63
   8  -9  -4   26.64   23.32
   4  -8   8  309.01   97.40
   8  -8  -4   51.54   36.87
  -8  -8   4   46.57   38.88
  -4  -8  -8  364.74  117.84
   4  -8   8  277.71   58.71
  -8  -7   4   53.66   30.46
   4  -7   8  182.61   67.13
  -4  -7  -8  113.19   56.87
  -8  -6   4  103.23   46.84
   4  -6   8   83.37   45.57
  -4  -6  -8  149.69   68.77
  -4  -5  -8  165.59   48.20
   8  -5  -4  153.48   56.33
  -4  -5  -8  157.34   67.44
   4  -5   8   47.18   34.65
  -8  -4   4   21.15   22.16
   4  -4   8 1646.35  181.06
   8  -4  -4   33.39   30.47
  -4  -4  -8 1203.27  176.46
  -4  -4  -8 1421.69  124.69
   8  -3  -4  254.14   68.19
   4  -3   8   88.15   39.79
  -4  -3  -8  210.29   47.90
  -8  -3   4  270.50   71.48
  -8  -2   4   41.00   26.57
   4  -2   8   10.49   17.94
   4  -2   8    6.55    7.97
  -8  -1   4  160.28   53.58
   4  -1   8  171.25   52.25
   8  -1  -4   51.25   29.45
   4  -1   8  159.01   58.80
   4   0   8 1483.49  182.77
  -8   0   4   45.23   27.43
   4   0   8 1341.44  139.69
   8   0  -4   40.40   20.05
  -8   1   4   25.73   20.48
   4   1   8   47.51   30.19
   4   1   8   68.87   33.64
  -8   2   4  150.55   45.92
   4   2   8  165.57   59.56
   8   2  -4   49.01   20.92
  -8   3   4  271.40   56.63
   4   3   8  216.95   74.17
  -4   3  -8   87.32   48.37
   4   4   8 1398.93  197.39
  -4   4  -8 1351.34  190.49
   4   5   8  160.66   64.73
  -4   5  -8   29.88   35.70
   4   6   8  133.87   62.56
  -4   6  -8   71.86   54.45
   8   6  -4  106.67   39.68
  -4   7  -8  127.42   70.01
   4   7   8  171.44   81.49
  -4   8  -8  285.52  100.08
   4   8   8  408.56  131.62
  -8   8   4   39.09   30.75
   4   9   8   80.19   63.62
  -4   9  -8   21.08   25.22
  -8   9   4   39.48   37.54
  -4  10  -8  209.53   93.65
   4  10   8  147.81   90.67
  -8  10   4  343.41  118.67
  -8  11   4   64.21   45.43
   4  11   8    1.19   10.17
   8  11  -4   35.88   47.23
  -8  12   4   35.13   39.73
   4  12   8   29.82   40.98
  -4  12  -8   18.96   38.67
   8  12  -4    7.82   24.51
  -8  13   4   26.94   38.07
  -4  13  -8   43.99   52.84
   4  13   8   33.99   46.83
  -8  14   4   46.55   47.99
   4  14   8  142.18  108.24
   8  14  -4  107.89   68.66
  -4  14  -8   19.50   26.38
  -8  15   4   -0.28   15.17
  -4  15  -8   97.18   84.67
   8  15  -4   58.75   64.13
   4  15   8   24.90   44.86
  -8 -15   5   37.65   42.18
   5 -15   8    4.55   19.35
  -5 -15  -8   64.93   61.82
  -8 -14   5   64.03   54.76
   5 -14   8   25.16   44.31
  -5 -14  -8   -2.29   15.57
  -8 -13   5   55.57   48.93
   5 -13   8  118.24   71.31
  -5 -13  -8   35.12   52.36
  -8 -12   5  158.87   75.69
   5 -12   8   69.65   57.04
  -5 -12  -8  102.52   69.90
  -8 -11   5   72.24   43.55
   5 -11   8   38.55   42.58
  -5 -11  -8  120.03   68.33
  -8 -10   5   57.90   38.61
   5 -10   8   10.16   19.89
   8 -10  -5   33.78   28.52
  -5 -10  -8   47.68   40.40
  -8  -9   5  160.18   68.34
   5  -9   8   73.39   50.63
  -5  -9  -8  100.36   61.82
   8  -8  -5  523.88  119.02
   5  -8   8   39.40   38.13
  -5  -8  -8  118.36   63.12
  -8  -8   5  716.58  141.31
  -8  -7   5  145.43   61.56
   8  -7  -5  221.57   72.43
   5  -7   8   44.12   35.52
  -5  -7  -8  268.95   93.23
  -8  -6   5   69.70   42.60
  -5  -6  -8  154.06   42.41
   5  -6   8    2.06   10.98
  -5  -6  -8  158.53   66.65
   8  -5  -5  176.70   60.59
  -5  -5  -8   19.10   14.01
   5  -5   8   -0.21    5.63
  -5  -5  -8   19.29   23.31
  -8  -5   5  199.54   66.47
  -8  -4   5   83.60   43.28
  -5  -4  -8   44.50   19.12
  -5  -4  -8   30.87   39.41
  -8  -3   5   72.05   41.64
  -5  -3  -8   85.84   25.80
  -8  -3   5   53.04   27.24
  -5  -3  -8   81.14   45.94
  -8  -2   5  144.61   54.39
   5  -2   8   74.11   46.43
  -5  -2  -8  233.01   71.69
  -8  -2   5  133.22   45.73
   8  -2  -5  185.20   52.94
   5  -2   8   62.56   32.55
  -8  -1   5  300.33   62.97
   8  -1  -5  165.75   50.02
  -8  -1   5  345.66   81.51
   5  -1   8  480.48   95.66
   5  -1   8  459.41   99.58
  -8   0   5  190.00   63.49
   5   0   8   63.22   37.49
   8   0  -5  138.29   36.22
   5   0   8   49.59   30.06
   5   1   8  146.37   57.52
  -8   1   5  148.03   48.46
   5   1   8  167.37   55.90
  -8   2   5  164.51   49.80
  -8   2   5  152.88   34.62
   8   2  -5  152.54   36.18
  -5   2  -8   63.91   34.34
   5   3   8   80.99   44.77
  -8   3   5  167.72   46.83
   5   4   8   19.17   24.91
   8   4  -5   34.35   14.96
   5   5   8   -1.82   13.94
  -5   5  -8    7.74   11.05
  -5   6  -8   -1.48   15.99
   5   6   8  117.72   63.58
   5   7   8  272.28  102.21
  -5   7  -8   63.03   45.44
  -5   8  -8   20.09   32.10
   5   8   8  133.54   76.87
   5   9   8   92.10   69.38
  -5   9  -8   69.84   55.85
  -8   9   5  205.27   92.35
  -5  10  -8    8.13   12.29
  -8  10   5   15.18   17.81
   5  11   8  148.21   92.02
  -5  11  -8   42.18   48.15
   8  11  -5   96.15   65.64
  -8  11   5  196.80   92.47
   5  12   8  113.75   88.91
  -5  12  -8   21.09   39.15
   8  12  -5  166.24   84.71
  -8  12   5   87.76   63.00
   5  13   8   32.59   30.50
  -5  13  -8   74.39   64.88
   8  13  -5  100.32   82.24
  -8  13   5   44.31   56.20
  -8  14   5   21.71   41.54
   8  14  -5   47.29   51.40
  -5  14  -8    2.49   15.61
   5  14   8   59.08   69.43
  -8  15   5   45.14   55.03
   8  15  -5   40.52   41.31
  -5  15  -8    0.62   31.67
   5  15   8   87.57   90.66
  -8 -14   6   66.22   50.57
   6 -14   8   37.48   53.65
  -6 -14  -8   19.29    3.69
  -8 -13   6   15.87   25.84
  -6 -13  -8   16.26   25.74
   6 -13   8   29.69   19.20
  -8 -12   6   11.67   17.92
   6 -12   8    5.64   42.10
  -6 -12  -8   50.31   44.57
  -8 -11   6   37.48   31.17
   8 -11  -6   16.35   16.41
  -6 -11  -8   45.54   32.87
  -8 -10   6   70.37   48.67
   6 -10   8   43.21   41.46
   8 -10  -6    9.35   23.88
  -6 -10  -8   -0.97   23.57
  -8  -9   6  159.80   69.60
   6  -9   8  114.58   63.64
  -6  -9  -8   27.41   31.27
   6  -8   8   51.67   40.90
  -6  -8  -8    6.99   13.80
  -8  -7   6   13.01   23.07
  -6  -7  -8   29.78   33.51
   8  -7  -6  352.02   92.22
   6  -7   8  331.15  101.58
  -6  -6  -8   72.07   47.56
   8  -6  -6   23.62   23.13
   6  -6   8  100.43   54.10
  -8  -5   6  402.36  103.96
   8  -5  -6   -8.55   17.08
   6  -5   8  255.45   89.46
  -6  -5  -8   14.14   17.25
  -6  -4  -8   55.94   15.67
   8  -4  -6   63.16   33.10
   6  -4   8  165.45   65.40
  -8  -4   6   65.75   27.63
  -8  -4   6   70.96   46.04
  -6  -4  -8   72.19   40.21
  -8  -3   6   30.20   27.16
  -8  -3   6   37.06   21.97
  -6  -3  -8   39.10   31.28
   6  -3   8   85.05   40.77
  -6  -3  -8   48.08   15.30
  -8  -2   6  289.11   78.63
   6  -2   8   48.23   38.76
  -8  -2   6  237.82   49.05
   8  -2  -6  303.02   67.47
  -6  -2  -8  207.34   70.55
   6  -2   8   30.94   28.65
  -6  -2  -8  229.19   38.45
  -6  -1  -8   32.22   25.89
   6  -1   8   93.20   46.74
   8  -1  -6   93.28   34.61
  -6  -1  -8   16.82   13.06
   6  -1   8  121.40   53.05
  -8   0   6  232.91   68.23
   6   0   8   70.30   46.31
   8   0  -6  202.11   41.71
  -6   0  -8   62.78   28.54
   6   0   8   72.49   36.68
  -8   1   6   59.22   36.48
  -6   1  -8   69.35   30.33
   6   1   8   34.12   29.76
   6   1   8   30.61   25.06
   6   2   8  161.44   66.24
  -8   2   6  226.35   61.01
   6   2   8  271.88   75.39
  -6   2  -8   35.59   26.75
  -8   2   6  233.98   37.33
  -6   3  -8   54.48   34.03
   6   3   8   37.57   34.40
   6   4   8   70.08   45.78
  -6   4  -8  150.96   59.77
   6   5   8   10.37   24.05
  -6   5  -8  163.94   64.85
   6   6   8   73.53   55.25
  -6   6  -8   79.84   48.47
  -6   7  -8  233.06   90.29
   6   7   8   31.87   33.56
  -6   8  -8   38.68   45.13
   6   8   8   11.89   24.08
  -6   9  -8   76.57   55.91
   6   9   8   30.23   38.52
   6  10   8   67.50   60.41
  -6  10  -8   29.44   43.68
   6  11   8   83.20   74.39
  -6  11  -8  144.69   86.77
   6  12   8  119.73   85.66
  -6  12  -8   -3.85   16.06
   8  12  -6   29.80   41.53
  -8  12   6  153.97   92.63
   6  13   8   16.69   24.30
  -6  13  -8   27.87   36.66
   8  13  -6   59.94   60.26
  -8  13   6   37.91   53.84
   6  14   8   40.83   43.96
  -6  14  -8   -3.30   25.26
  -8  14   6   -1.25   11.38
   8  14  -6   44.95   44.23
  -8 -14   7   39.11   41.79
   7 -14   8   68.64   67.40
  -7 -14  -8   -2.06   26.05
  -8 -13   7    5.85   15.56
   7 -13   8    3.27    8.82
  -7 -13  -8   -7.60   27.98
  -8 -12   7   14.44   11.19
  -7 -12  -8   32.51   25.58
  -8 -11   7  113.52   62.05
  -7 -11  -8   27.42   33.63
   8 -11  -7   72.46   49.24
   7 -11   8   33.06   45.33
  -8 -10   7   32.37   32.22
   7 -10   8   39.70   40.07
  -7 -10  -8  121.06   70.99
  -8  -9   7   39.82   32.06
  -7  -9  -8   31.10   30.81
  -8  -8   7    4.05    7.94
  -7  -8  -8   78.81   52.52
  -8  -7   7   66.88   42.47
  -7  -7  -8   17.37   21.62
   8  -7  -7   52.04   34.33
   7  -7   8   22.47   15.24
  -8  -6   7  105.24   54.71
   8  -6  -7   70.15   38.09
   7  -6   8   54.45   43.88
  -8  -5   7   94.81   49.59
   8  -5  -7   10.84   18.77
  -7  -5  -8   44.27   36.78
  -8  -4   7  190.70   70.54
   8  -4  -7   95.08   42.02
   7  -4   8  167.53   65.66
  -7  -4  -8  148.63   68.05
  -7  -3  -8   14.60   23.22
  -8  -3   7   14.35    7.09
  -8  -3   7    9.59    8.90
   8  -3  -7  144.99   48.62
   7  -3   8  176.67   64.16
  -8  -2   7  265.54   85.67
   8  -2  -7  148.64   44.24
   7  -2   8  169.34   62.50
  -7  -2  -8  245.38   76.09
   7  -2   8  207.49   74.94
  -7  -1  -8  226.62   37.76
   7  -1   8  118.77   58.30
   8  -1  -7  205.40   49.41
   7  -1   8  158.27   58.48
  -7  -1  -8  244.23   74.30
  -8  -1   7  278.14   81.13
  -8   0   7   59.74   35.47
   7   0   8    9.41    3.51
   8   0  -7   66.81   21.16
  -7   0  -8    5.22    9.45
  -7   0  -8    5.76   10.72
   7   0   8    9.65   19.31
   7   1   8  349.11   97.61
  -8   1   7  125.79   49.70
  -7   1  -8  129.45   42.11
   8   1  -7  257.22   39.58
   7   1   8  353.67   85.43
  -7   1  -8  116.50   48.19
   7   2   8  213.00   76.95
  -8   2   7  141.24   50.55
  -8   2   7  171.85   32.32
  -7   2  -8  168.12   53.55
  -7   2  -8  134.66   44.59
   7   2   8  311.32   87.85
  -7   3  -8  184.03   60.64
  -8   3   7  195.99   48.80
  -7   4  -8  124.16   54.10
  -8   4   7   87.20   41.33
   7   4   8  122.81   63.46
   7   5   8   30.43   34.06
  -8   5   7   10.50   20.68
   7   6   8  226.18   89.97
  -7   6  -8   38.67   37.43
   7   7   8   15.93   25.36
  -7   7  -8   26.04   29.94
  -7   8  -8  296.86  103.15
   7   8   8  112.02   69.66
  -7   9  -8  127.71   77.85
   7   9   8   37.60   55.33
  -7  10  -8   42.89   55.23
   7  10   8  141.59   88.92
  -7  11  -8   10.92   20.86
   7  11   8   53.89   54.67
   7  12   8   43.86   64.71
   8  12  -7   19.12   19.28
   7  13   8    7.11   18.52
  -7  13  -8   16.03   36.48
   8  13  -7   -3.39   33.45
   7  14   8   17.19    6.43
  -7  14  -8   57.57   63.94
   8  14  -7   35.09   38.82
  -8 -13   8   -0.98   17.06
  -8 -13  -8   16.56   26.74
   8 -13   8   27.87   35.25
  -8 -12   8    3.26   17.73
   8 -12   8   12.47   24.83
  -8 -12  -8   -9.83   21.82
  -8 -11   8    9.19    3.33
  -8 -11  -8    5.38   20.37
  -8 -10   8   -4.19    7.74
  -8 -10  -8    6.22   18.54
  -8  -9   8    6.51   16.70
   8  -9   8   13.46   26.73
  -8  -9  -8   -1.01   10.27
  -8  -8   8   54.86   55.05
   8  -8   8   24.97   31.54
  -8  -8  -8   20.67   25.92
  -8  -7  -8  201.43   79.34
   8  -7   8  135.57   70.56
  -8  -6   8   54.31   38.92
   8  -6  -8   24.06   21.39
   8  -6   8    5.62   11.95
  -8  -6  -8   28.60   23.36
  -8  -5   8   37.79   32.86
   8  -5  -8  117.11   43.73
  -8  -5  -8   25.93   28.92
  -8  -4   8  299.61   91.18
   8  -4  -8  394.56   81.84
   8  -4   8  381.51  103.04
  -8  -4  -8  210.38   79.55
   8  -3  -8   46.51   30.50
   8  -3   8   43.03   36.45
   8  -2  -8    2.71    8.24
   8  -2   8    1.31   12.80
  -8  -1   8   16.15   22.62
   8  -1  -8  447.93   64.42
   8  -1   8  510.98  118.81
  -8  -1  -8   21.46   20.93
   8  -1   8  469.20  110.10
  -8   0  -8  490.55   68.02
  -8   0  -8  323.36   84.03
  -8   0   8  444.89  103.34
   8   0  -8  422.09   50.85
   8   0   8  406.82   94.96
   8   0   8  379.34   96.30
  -8   1  -8  470.23   81.45
  -8   1   8  430.08   94.83
   8   1   8   13.35   24.38
  -8   1  -8  285.63   72.03
   8   1   8   -2.24   16.78
   8   2   8  189.41   73.66
   8   2   8  228.57   81.73
  -8   2   8   -1.36    3.43
  -8   2  -8    8.30   13.77
  -8   2   8    4.43    6.11
  -8   2  -8    5.83   12.83
  -8   3  -8   29.33   23.08
  -8   3   8   30.72   17.64
  -8   3  -8   46.99   32.84
   8   4   8  241.34   82.91
  -8   4   8  446.50   88.03
  -8   4  -8  363.31   93.66
  -8   4  -8  279.78   61.09
   8   5   8   45.38   47.84
  -8   5  -8  117.94   56.77
  -8   5   8  183.69   67.21
   8   6   8   38.52   37.08
  -8   6   8    1.23   17.74
  -8   6  -8   18.90   24.30
   8   7   8  289.52  111.86
  -8   7  -8  107.67   61.03
  -8   7   8  123.68   60.75
  -8   8  -8   38.26   41.84
   8   8   8   28.13   34.07
  -8   8   8   14.34   20.18
  -8   9  -8   21.02   38.00
   8   9   8   -7.81   32.64
  -8   9   8    5.20   26.85
  -8  10  -8   67.47   61.02
   8  10   8   14.44   33.15
  -8  11  -8   88.90   72.03
   8  11   8   15.87   43.66
  -8  12  -8   22.37   41.88
   8  12   8   17.07   36.12
  -8  13  -8   45.75   56.00
   8  13  -8   27.07   41.58
   8  13   8   13.31   38.64
  -8 -13   9   18.51   38.64
   9 -13   8   21.71   31.51
  -9 -13  -8   48.80   56.26
   8 -12  -9   12.00   13.52
  -8 -12   9   34.75   33.81
   9 -12   8  -10.10   42.19
  -9 -12  -8    4.30   33.46
  -8 -11   9  132.61   75.36
   9 -11   8   35.35   51.24
  -9 -11  -8  136.28   81.30
  -8 -10   9    2.50    8.39
   9 -10   8   28.02   45.18
  -9 -10  -8   44.29   40.41
  -8  -9   9   55.43   47.81
  -9  -9  -8   84.43   54.56
   9  -9   8  131.08   78.50
   9  -8   8   10.57   20.89
  -9  -8  -8    9.41   22.05
   9  -7   8   95.56   73.18
  -9  -7  -8   86.10   55.84
  -8  -6   9   11.41   17.26
   8  -6  -9   17.24   22.18
   9  -6   8   21.69   20.93
  -9  -6  -8   50.89   35.60
  -9  -5  -8   42.78   34.00
  -8  -5   9   85.28   52.22
   8  -5  -9  186.63   56.86
   9  -5   8   85.14   52.78
  -8  -4   9  188.95   82.99
   8  -4  -9  130.56   48.00
  -9  -4  -8    4.85    7.68
   9  -4   8  112.18   57.43
  -8  -3   9  356.19  103.20
  -9  -3  -8   67.58   39.79
   8  -3  -9  244.65   61.18
   9  -3   8  190.76   73.63
  -8  -2   9   54.59   37.61
   8  -2  -9   -0.67    9.26
  -9  -1  -8  132.31   53.60
   9  -1   8   34.52   37.15
  -8  -1   9   30.15   26.50
   9  -1   8   48.98   36.92
  -8   0   9  110.81   51.37
   9   0   8   99.31   55.76
  -9   0  -8   76.63   41.89
   9   0   8  116.33   52.32
   9   1   8  195.48   78.29
  -8   1   9  250.65   74.72
  -9   1  -8   66.38   26.42
   9   1   8  228.80   76.50
  -9   1  -8   38.10   28.36
   9   2   8  203.48   77.81
  -9   2  -8  274.72   65.02
  -9   2  -8  174.96   56.74
   9   2   8  209.62   74.53
  -9   3  -8  267.82   75.04
  -8   3   9  203.70   50.60
  -9   3  -8  165.37   49.78
   9   3   8   62.43   46.58
  -9   4  -8  109.77   54.61
  -8   4   9  135.06   46.67
   9   4   8    5.33   14.27
  -9   5  -8  102.33   56.14
  -8   5   9  204.04   65.03
   9   5   8   75.06   48.48
   9   6   8   96.10   64.92
  -9   6  -8   31.43   36.62
  -8   6   9   13.75   15.55
  -9   7  -8   51.97   47.84
  -8   7   9   -0.79   16.69
   9   8   8    0.10   14.69
  -9   8  -8    1.80    5.04
  -9   9  -8  170.15   94.04
   9   9   8  104.66   69.54
  -8   9   9  110.80   61.21
  -8  10   9   22.05   26.42
  -9  10  -8   13.05    7.85
   9  10   8   35.13   47.05
  -9  11  -8   14.23   36.67
  -8  11   9   52.53   58.19
   9  11   8  179.05   99.87
  -9  12  -8   24.50   42.72
  -8  12   9   23.54   40.37
   9  12   8    6.75   17.26
  -9  13  -8    9.08   10.89
   9  13   8  104.86   86.20
  -8  13   9   18.58   21.37
   8  13  -9   43.63   43.44
  -7 -13   9   41.99   34.23
   9 -13   7   27.70   40.71
   7 -13  -9   36.58   24.92
  -9 -13  -7   13.36   15.80
  -7 -12   9   56.94   50.53
   9 -12   7   -5.58    4.47
   7 -12  -9    9.02   13.33
  -9 -12  -7   19.88   37.62
  -7 -11   9   -5.18   23.18
   7 -11  -9   42.08   34.79
  -9 -11  -7    2.59   18.46
  -9 -10  -7   38.10   41.24
   9 -10   7  114.47   69.05
   9  -9   7    7.89   15.54
  -9  -9  -7  -12.89   27.50
  -7  -8   9    3.55   13.08
   9  -8   7   45.79   40.45
  -9  -8  -7   48.48   41.90
  -7  -7   9   37.83   32.42
  -9  -7  -7   81.71   58.06
  -7  -6   9  692.60  145.55
   9  -6   7 1167.21  215.60
  -9  -5  -7   26.07   28.55
   9  -5   7   -2.58   12.48
  -7  -4   9   53.22   44.51
   9  -4   7   57.78   40.79
  -9  -4  -7   10.75   23.67
  -7  -3   9   69.38   43.97
   7  -3  -9   25.94   16.46
  -9  -3  -7   95.37   48.82
  -7  -2   9  388.84   99.41
   7  -2  -9  106.61   31.61
   9  -2   7  473.62  109.68
  -9  -2  -7   80.15   45.23
   9  -1   7   45.58   37.12
   9  -1   7   54.20   36.24
  -9  -1  -7  137.81   49.86
  -9   0  -7   26.93   11.82
   9   0   7   26.87   24.57
  -9   0  -7   17.21   18.21
   9   0   7   36.00   29.91
   9   1   7  266.14   82.26
  -9   1  -7   56.95   23.99
  -9   1  -7   34.88   21.10
  -7   1   9  325.76   83.31
   9   1   7  263.70   79.09
  -7   1   9  378.85   51.60
  -7   2   9  130.81   34.99
   9   2   7  128.59   58.73
  -9   2  -7  265.06   58.83
   9   2   7  137.78   58.10
  -7   3   9   36.92   23.72
  -9   3  -7  163.41   41.96
   9   3   7   83.36   48.71
   9   3   7  145.64   64.48
   9   4   7    4.34    7.13
  -9   4  -7   26.54   14.50
   9   5   7   26.98   28.27
  -9   5  -7   -9.09   15.62
   9   6   7   27.40   35.32
  -7   6   9   63.78   45.23
   9   7   7   53.28   42.54
  -7   7   9   26.98   19.78
  -9   8  -7   30.02   38.40
   9   8   7   40.06   38.57
  -9   9  -7    6.13   28.65
   9   9   7   -0.17   19.28
   9  10   7   62.57   54.18
  -9  10  -7  140.46   83.65
  -7  10   9   78.34   59.76
  -7  11   9   51.79   28.43
   9  11   7    0.86   16.90
  -9  12  -7   38.45   54.55
  -7  12   9    4.74   30.80
   9  12   7   11.54   18.52
  -9  13  -7    9.94   25.10
  -7  13   9   58.63   67.64
   9  13   7   19.29   24.91
   7  13  -9   14.33   25.74
  -6 -14   9   57.69   43.22
   9 -14   6   61.47   73.88
   6 -14  -9   67.70   54.79
  -9 -14  -6  131.39   94.68
  -9 -13  -6   -9.11    4.15
   9 -13   6    7.53   29.90
   6 -13  -9   -2.76    5.59
  -6 -12   9   21.12   29.51
   9 -12   6   18.25    7.81
   6 -12  -9   28.00   30.59
  -9 -12  -6   39.72   50.39
  -6 -11   9   14.36   20.39
   6 -11  -9   15.86    3.08
  -9 -11  -6    2.30   18.52
  -6 -10   9  281.39  100.73
   9 -10   6  138.45   77.87
  -9 -10  -6  122.77   76.26
   9  -9   6  102.07   64.74
  -9  -9  -6   76.13   50.01
  -6  -8   9   -5.84   11.46
   9  -8   6  128.10   74.67
  -9  -8  -6  150.62   75.18
  -6  -7   9   38.44   30.01
  -9  -7  -6   27.28   32.88
  -6  -6   9  177.11   70.76
   9  -6   6   37.50   39.34
  -9  -6  -6   72.75   53.10
  -6  -5   9  368.33  104.15
   9  -5   6  488.49  139.84
  -6  -4   9   45.01   32.90
  -9  -4  -6  145.98   66.91
  -6  -3   9  215.65   73.15
   9  -3   6   36.58   29.61
  -9  -3  -6  182.05   70.57
  -6  -2   9  277.19   83.25
   6  -2  -9  230.99   45.03
   9  -2   6   16.45   20.40
  -9  -2  -6   51.97   32.33
  -6  -1   9  180.51   66.25
   6  -1  -9   92.82   23.04
   9  -1   6  361.26   94.68
   9  -1   6  405.54   99.04
  -9  -1  -6    8.91   11.13
  -9   0  -6  201.08   58.70
   9   0   6  386.66  100.20
   9   0   6  337.37   87.35
  -6   1   9   94.29   31.48
  -9   1  -6  243.62   59.96
   6   1  -9  129.42   37.16
   9   1   6    5.57    5.00
   9   1   6   10.29   16.04
  -9   1  -6  369.82   59.91
  -9   2  -6   19.33   16.01
  -9   2  -6   11.02    9.82
   9   2   6   66.75   43.76
   9   2   6   75.62   43.69
   9   3   6  203.72   70.53
  -9   3  -6   32.36   23.31
  -6   3   9  216.25   57.97
  -9   3  -6   17.88   12.56
   9   3   6  272.33   83.23
   9   4   6  138.40   63.55
  -9   4  -6  132.26   28.46
  -6   4   9    4.54   11.61
   9   5   6   34.08   35.90
  -6   5   9   36.15   25.80
   9   6   6   70.84   49.75
  -9   6  -6   19.59   21.06
  -9   7  -6  333.06  101.87
   9   7   6   49.99   40.54
  -6   8   9    9.86    3.02
  -9   8  -6  138.51   72.64
   9   8   6  107.25   61.67
  -9   9  -6   92.70   60.38
  -6   9   9   42.10   32.32
   9   9   6   93.35   64.30
  -9  10  -6  115.92   72.89
  -6  10   9  177.45   95.71
   9  10   6  109.55   72.32
  -6  11   9   56.39   50.81
  -9  11  -6   43.30   48.57
   9  11   6   22.23   29.12
   9  12   6   43.73   53.89
  -9  12  -6    4.06    8.69
  -6  12   9   51.88   63.38
   6  12  -9   37.24   52.12
   9  13   6    2.67    5.80
  -9  13  -6   -1.04   23.75
  -6  13   9   18.60   40.46
   9  14   6  161.37  107.18
  -9  14  -6   48.91   48.44
   6  14  -9   63.18   63.71
  -6  14   9   94.79   93.76
   5 -14  -9   17.97   15.27
  -5 -14   9   21.55   28.19
  -9 -14  -5    0.87   38.57
   9 -14   5   17.27   26.09
  -5 -13   9   53.42   43.05
   9 -13   5   33.98   37.68
   5 -13  -9    5.88   19.97
  -5 -12   9  205.52   88.90
   9 -12   5  267.99  120.51
   5 -12  -9   26.78   30.84
  -9 -12  -5   20.47   34.98
  -5 -11   9  154.31   75.76
   9 -11   5   28.17   41.11
   5 -11  -9  133.46   68.20
  -9 -11  -5   45.42   48.47
  -5 -10   9   -0.72   15.25
   9 -10   5   10.93   20.63
  -5  -9   9    6.07   11.12
   9  -9   5    6.15   10.69
  -9  -9  -5   26.74   34.97
  -5  -8   9  187.52   71.50
   9  -8   5  192.66   86.24
  -9  -8  -5  158.01   71.91
  -5  -7   9  222.73   78.58
   9  -7   5   69.15   52.18
  -9  -7  -5  169.72   73.93
  -5  -6   9   61.10   42.38
   9  -6   5    4.50   12.10
  -5  -5   9   67.40   43.75
   9  -5   5   85.76   55.71
  -9  -5  -5   76.36   48.44
  -5  -4   9  223.19   77.92
   9  -4   5  112.41   61.91
  -9  -4  -5  351.26   92.87
  -5  -3   9   61.54   37.32
   9  -3   5  182.01   67.66
  -9  -3  -5  168.29   63.84
  -9  -2  -5  100.42   46.31
  -5  -2   9  261.62   78.66
   9  -2   5  129.54   52.02
   9  -2   5  158.37   58.21
   9  -1   5   77.02   39.47
  -5  -1   9   83.12   41.30
   5  -1  -9    3.30    5.42
   9  -1   5   77.68   42.33
  -9  -1  -5   25.03   23.29
   5   0  -9   63.25   29.59
   9   0   5  102.06   46.80
  -5   0   9  104.40   43.94
   9   0   5   91.92   48.82
  -5   0   9  149.06   39.73
  -9   0  -5   77.31   35.23
   9   1   5   26.11   23.22
   5   1  -9   88.15   36.74
  -5   1   9   11.11   13.38
  -9   1  -5   42.85   23.64
   9   1   5   25.84   27.33
  -9   1  -5   71.56   27.31
   9   2   5  160.45   60.47
  -9   2  -5  112.81   36.60
   5   2  -9  191.85   49.21
   9   2   5  165.70   63.55
  -9   2  -5  160.83   47.36
   9   3   5  210.71   67.57
   9   3   5  311.54   85.65
  -5   3   9  167.08   52.92
  -9   3  -5  190.57   55.44
  -9   3  -5  115.34   32.16
  -9   4  -5  110.50   45.56
  -5   4   9  107.79   45.34
  -5   5   9   58.23   39.52
   9   5   5  106.13   56.56
  -9   5  -5  119.56   56.16
  -9   6  -5   23.43   25.70
   9   6   5  168.31   70.95
  -5   6   9  297.39   96.57
  -9   7  -5   31.02   29.87
   9   7   5  125.34   61.65
  -5   8   9   57.07   42.96
  -9   8  -5  119.76   68.95
   9   8   5  161.54   78.74
  -9   9  -5   34.83   43.98
  -5   9   9   73.74   61.69
   9   9   5   15.63   20.95
  -5  10   9  115.55   76.87
  -9  10  -5   17.28   31.33
   9  10   5  186.39   91.97
   9  11   5   42.84   50.17
  -9  11  -5   27.45   34.46
  -5  12   9   26.46   36.71
   9  12   5   24.97   42.15
  -9  12  -5  188.61   99.94
   5  12  -9  185.88   98.86
  -9  13  -5   46.30   49.57
  -5  13   9   30.42   33.94
   5  13  -9   49.30   54.07
  -9  14  -5    0.96   31.26
   9  14   5   -8.90    6.62
  -5  14   9    5.74   36.74
   5  14  -9   35.34   60.21
  -4 -14   9   29.74   29.66
   9 -14   4   22.70   38.96
   4 -14  -9   53.08   63.23
  -9 -14  -4   -3.10   21.31
  -4 -13   9   13.75   22.79
  -9 -13  -4   23.24   20.86
   4 -13  -9   10.94    7.07
  -4 -12   9   85.03   52.71
   9 -12   4  136.17   83.44
   4 -12  -9  137.97   80.35
  -9 -12  -4   28.67   44.76
  -4 -11   9  162.99   72.33
   4 -11  -9    8.35   14.34
   9 -11   4  128.69   75.34
  -9 -11  -4    9.47   17.89
  -4 -10   9   11.67   25.06
   4 -10  -9   47.29   39.40
   9 -10   4   45.15   48.43
  -9 -10  -4  128.43   76.68
  -4  -9   9    8.19   25.27
   9  -9   4  139.57   76.84
  -9  -9  -4  117.71   68.25
  -4  -8   9  142.22   60.68
   9  -8   4  170.19   76.88
  -9  -8  -4   18.60   28.76
  -4  -7   9  198.92   73.23
  -4  -7   9  179.55   39.30
   9  -7   4   30.55   32.26
  -9  -7  -4   14.79   13.59
  -4  -6   9    7.02   14.28
  -4  -6   9   13.26    9.20
   9  -6   4   44.95   43.82
  -4  -5   9  125.16   57.81
   9  -5   4  294.25   93.99
  -9  -5  -4  399.62  108.77
  -4  -4   9  123.75   55.73
  -9  -4  -4   39.07   31.03
   9  -3   4   35.40   27.30
  -9  -3  -4   57.52   36.32
  -4  -2   9   17.52   22.72
   9  -2   4  132.53   54.75
  -4  -1   9  159.29   55.45
   9  -1   4  106.62   35.96
   4  -1  -9  140.68   26.43
   9  -1   4  131.38   51.71
   9  -1   4  163.31   59.76
  -4   0   9   34.49   25.07
  -4   0   9   50.53   23.88
   9   0   4  395.27   62.26
   9   0   4  617.17  116.21
  -9   0  -4  470.83   92.57
   9   0   4  533.15  102.10
   9   1   4  492.75   99.27
  -4   1   9  176.19   47.82
   9   1   4  205.62   38.38
   9   1   4  393.77   90.21
  -9   1  -4  123.92   41.28
  -9   1  -4  159.96   42.42
   9   2   4  371.83   87.24
  -9   2  -4   74.75   27.34
  -9   2  -4  151.53   47.30
   9   2   4  440.70   93.30
  -4   2   9   18.74   17.96
  -9   3  -4   20.34   20.44
  -4   3   9   87.34   39.90
   9   3   4   38.93   27.46
   9   3   4   69.68   37.42
  -9   3  -4    4.29    6.04
   9   4   4   27.62   24.82
  -4   4   9  119.57   51.46
   9   5   4  389.32  101.65
  -4   5   9  216.78   76.41
  -9   5  -4  249.36   74.64
  -9   6  -4   52.74   38.66
  -4   6   9   53.03   46.16
   9   6   4  181.67   70.06
  -9   7  -4   25.88   32.89
   9   7   4    3.73    7.19
  -4   7   9   66.25   51.54
  -9   8  -4  175.96   76.91
  -4   8   9  144.22   78.87
   9   8   4   22.61   33.80
  -4   9   9  285.25  121.04
  -9   9  -4  119.68   73.76
   9   9   4  120.38   67.40
   9  10   4  114.87   71.60
  -9  10  -4   40.04   44.03
  -4  10   9   71.01   64.54
   9  11   4   32.84   40.37
  -9  11  -4   91.26   66.60
  -4  11   9   26.64   42.98
  -9  12  -4  130.30   77.94
   9  12   4   19.81   38.28
   4  12  -9   84.98   68.41
  -4  12   9  166.70   99.72
  -4  13   9  -18.65   42.58
  -9  13  -4  123.13   85.27
   9  13   4   55.31   41.02
   4  13  -9   16.53   32.49
  -4  14   9   25.11   19.57
  -9  14  -4   11.43   36.11
   4  14  -9   24.95   30.47
   9  14   4  -10.48   14.66
  -3 -15   9    9.64    2.86
   9 -15   3   -1.98    8.48
  -9 -15  -3   26.76   40.71
   9 -14   3    2.04   14.73
   3 -14  -9   27.72   42.95
  -9 -14  -3   21.73   39.14
  -3 -13   9   74.02   52.61
   3 -13  -9   84.33   62.93
   9 -13   3   76.99   56.15
  -9 -13  -3  175.45  100.51
   3 -12  -9   77.87   52.05
  -3 -12   9   53.63   40.50
   9 -12   3  109.37   67.10
  -9 -12  -3  104.38   83.87
  -3 -11   9  186.16   76.26
   9 -11   3  -12.50   36.03
   3 -11  -9   31.96   31.33
  -9 -11  -3  115.73   74.91
   9 -10   3   12.64   21.90
   3 -10  -9   13.82   31.95
  -9 -10  -3   61.73   53.00
  -3  -9   9  293.47   90.92
  -3  -9   9  307.60   72.41
   9  -9   3  178.12   90.22
  -9  -9  -3  126.56   75.67
  -3  -8   9  195.19   72.74
  -3  -8   9  172.66   48.13
   9  -8   3   99.13   58.46
  -9  -8  -3  191.01   88.95
  -3  -7   9   38.10   30.47
  -3  -7   9   36.09   19.66
   9  -7   3  -12.09   21.81
  -3  -6   9  293.88   93.67
  -3  -6   9  230.16   42.43
  -9  -6  -3  132.39   70.77
   9  -5   3    6.02   17.97
  -9  -5  -3   47.69   41.16
  -3  -4   9   85.36   42.24
   9  -4   3   67.19   38.58
  -3  -3   9   11.03   17.37
   9  -3   3    9.70   22.79
   9  -2   3  128.13   50.40
  -9  -2  -3   73.71   40.95
  -3  -1   9   92.04   35.87
   9  -1   3  135.34   44.12
  -3  -1   9   81.21   40.84
   3  -1  -9   33.51   12.47
   9  -1   3  175.67   60.20
   9  -1   3  145.80   42.43
  -9  -1  -3    0.23    5.46
  -3   0   9  664.32   96.19
   9   0   3  122.52   36.33
   3   0  -9  527.91   41.81
   9   0   3  177.61   58.84
  -9   0  -3  100.16   39.58
   9   0   3  178.19   53.87
   9   1   3    9.79   18.08
   9   1   3    5.70    6.09
  -3   1   9   28.67   20.46
   9   1   3    6.02    7.14
   9   2   3   47.02   18.41
  -3   2   9  138.44   48.95
   9   2   3   60.76   31.94
  -9   2  -3   90.30   27.56
   9   2   3   73.85   37.06
  -9   2  -3  117.80   41.06
   9   3   3  159.28   25.29
  -9   3  -3    3.88    4.71
  -9   3  -3    3.93    7.73
   9   3   3  189.14   59.59
  -3   3   9   12.44   12.28
   9   3   3  262.55   74.42
   9   4   3  327.00   87.61
   9   4   3  218.52   32.34
  -3   4   9  184.05   64.32
   9   4   3  327.64   35.01
  -3   5   9   49.30   40.14
  -9   5  -3   18.22   22.35
   9   5   3   71.11   22.30
   9   5   3   70.61   43.45
  -9   6  -3   21.27   24.63
   9   6   3  182.96   39.86
   9   6   3  128.02   55.32
  -3   6   9  214.51   89.33
   9   7   3  214.49   51.86
  -9   7  -3   -5.09    9.55
   9   7   3  211.95   79.61
  -3   7   9   53.13   41.49
  -9   8  -3   82.14   51.64
   9   8   3  153.12   72.85
  -3   9   9  158.43   93.28
   9   9   3  104.39   61.72
  -9   9  -3  121.15   65.66
  -9  10  -3   35.76   35.45
   9  10   3   60.32   49.96
  -3  10   9   -2.22   31.71
  -9  11  -3   28.84   45.62
   9  11   3  106.76   73.58
  -3  11   9   49.98   50.62
   3  11  -9  190.84  101.73
  -9  12  -3   99.61   73.34
   9  12   3  117.09   83.35
  -3  12   9   88.34   81.51
   3  12  -9   61.22   66.95
  -3  13   9  124.30  100.61
  -9  13  -3   89.54   69.91
   9  13   3  154.54   96.74
   3  13  -9   97.80   79.13
  -9  14  -3    4.38   27.38
   9  14   3   -4.45   33.83
  -3  14   9   19.81   18.17
  -9  15  -3  -12.48   42.37
   9  15   3   24.13   37.48
   3  15  -9   19.72   37.41
  -3  15   9   86.31   77.41
  -2 -15   9    8.04   27.22
   2 -15  -9   34.66   41.41
   9 -15   2   59.63   57.46
  -9 -15  -2   12.35   26.24
  -2 -14   9   92.11   55.73
   9 -14   2  114.93   71.80
   2 -14  -9   90.27   62.18
  -9 -14  -2   99.20   75.71
  -2 -13   9   41.17   36.69
   9 -13   2   13.30   10.65
   2 -13  -9    9.99    3.36
  -9 -13  -2   21.55   38.12
  -2 -12   9   39.84   35.15
   9 -12   2   32.53   30.02
   2 -12  -9   63.43   49.29
  -9 -12  -2   36.62   45.26
  -2 -11   9    8.05   11.14
   2 -11  -9   25.45   31.56
  -2 -11   9    0.93    2.57
  -9 -11  -2   -3.62    7.70
  -2 -10   9  202.18   74.67
  -2 -10   9  185.27   61.80
   9 -10   2  179.68   83.53
   2 -10  -9  210.89   85.17
  -9 -10  -2   32.72   34.13
   2  -9  -9   46.70   34.15
  -2  -9   9   67.07   41.83
  -2  -9   9   73.63   36.35
   9  -9   2  102.23   64.57
  -9  -9  -2   63.00   45.82
  -2  -8   9   -2.19    8.83
  -2  -8   9   14.00   15.51
  -9  -8  -2   43.53   42.92
  -2  -7   9  165.94   63.33
  -2  -7   9  159.81   46.69
  -9  -7  -2  156.29   76.17
  -2  -6   9  280.96   88.74
  -2  -6   9  248.24   49.06
   9  -6   2  224.87   85.49
  -9  -6  -2  200.00   84.55
  -2  -5   9  532.01  106.43
   9  -5   2  637.99  136.25
  -2  -5   9  655.50   72.72
  -2  -4   9   24.78   20.12
   9  -4   2  331.70  100.25
  -2  -4   9   11.32    5.20
  -9  -4  -2  460.19  111.63
  -2  -3   9  137.25   53.73
   9  -3   2  158.26   65.43
   9  -3   2  107.46   24.37
  -9  -3  -2  152.96   58.21
  -2  -2   9  122.83   47.15
   9  -2   2  229.87   45.88
   2  -2  -9  109.64   29.16
  -9  -2  -2   99.45   43.20
   9  -1   2  373.57   78.64
   9  -1   2  345.12   85.30
   9  -1   2  316.23   65.91
   2  -1  -9   13.19    8.86
  -2  -1   9  196.96   54.48
  -9  -1  -2   66.48   35.63
   9   0   2  223.32   53.41
  -2   0   9   21.84   19.33
   9   0   2  233.75   67.39
   2   0  -9   23.18   10.90
  -9   0  -2  284.38   74.32
   9   0   2  263.85   64.12
   2   1  -9  126.62   20.95
   9   1   2   86.37   36.06
   9   1   2   79.66   38.54
  -2   1   9    8.93   15.13
   9   1   2   78.49   27.75
   9   2   2  113.83   43.82
  -2   2   9  120.38   50.08
   9   2   2  119.20   45.49
  -9   2  -2  261.86   44.56
   9   2   2  111.27   30.24
  -9   3  -2  105.31   23.36
   9   3   2  113.93   42.26
  -9   3  -2  143.70   52.77
   9   3   2  162.43   53.00
   9   3   2  134.41   31.55
   9   4   2  405.88   91.22
  -9   4  -2  279.50   77.23
   9   5   2   23.09   18.99
   9   5   2   39.40   21.51
   9   6   2  246.70   60.23
  -9   6  -2  242.71   79.23
   9   6   2  172.65   64.57
  -2   6   9  286.24   97.32
   9   7   2  163.41   51.09
  -2   7   9  404.79  127.38
   9   7   2  138.61   61.57
  -9   7  -2  370.96  106.06
  -2   8   9   71.73   62.75
   9   8   2   31.57   31.68
   9   8   2   48.75   29.94
  -9   9  -2   79.72   50.85
   9   9   2   89.56   55.52
   9   9   2  138.48   54.33
  -2   9   9   27.39   11.01
  -2  10   9  272.12  125.51
   9  10   2   37.44   43.08
   2  10  -9  252.46  119.30
  -9  10  -2  207.40   89.95
  -2  11   9   51.14   45.19
   9  11   2    4.29   10.36
   2  11  -9    4.95   13.04
  -2  12   9   71.17   68.53
   9  12   2   65.37   61.87
   2  12  -9   49.11   56.17
  -9  12  -2   25.50   37.57
  -9  13  -2   12.94    3.53
  -2  13   9   -6.14    4.77
   9  13   2  -22.07   31.75
  -9  14  -2  127.32   81.02
  -2  14   9  152.90  110.58
   2  14  -9   98.23   78.39
   9  14   2  105.60   76.63
  -9  15  -2   54.67   47.62
   2  15  -9   -7.43   28.81
  -2  15   9   18.84   30.31
   9  15   2    0.30   29.66
  -1 -15   9   39.45   37.93
   1 -15  -9   20.13   25.66
   9 -15   1   79.34   66.19
  -9 -15  -1   27.49   41.93
  -1 -14   9   87.74   55.07
   9 -14   1   38.01   30.41
   1 -14  -9   -4.43    8.75
  -9 -14  -1   94.70   72.27
  -1 -13   9   59.27   46.03
   9 -13   1  -15.68   27.39
   1 -13  -9   32.51   40.01
  -9 -13  -1   13.77   15.72
  -1 -12   9   36.71   34.63
  -1 -12   9   29.62   28.39
   9 -12   1    7.97   18.74
   1 -12  -9   68.33   44.45
  -9 -12  -1  132.05   75.88
  -1 -11   9   82.51   46.43
  -1 -11   9   70.51   44.78
   9 -11   1  156.84   72.42
   1 -11  -9  121.00   67.29
  -9 -11  -1   86.79   65.17
  -1 -10   9   20.53   23.68
  -1 -10   9   19.48   15.09
   1 -10  -9   57.81   47.36
  -9 -10  -1    7.40   15.10
  -1  -9   9  113.15   54.10
   1  -9  -9   72.60   52.21
  -1  -9   9   80.58   39.81
   9  -9   1   77.66   56.40
  -9  -9  -1   77.69   55.25
  -1  -8   9  325.61   94.62
  -1  -8   9  279.75   69.88
   9  -8   1   65.80   53.29
  -9  -8  -1  207.13   84.59
  -1  -7   9  468.75  111.99
  -1  -7   9  451.83   90.54
   9  -7   1  307.77  107.42
  -1  -6   9   77.55   42.05
  -1  -6   9   91.34   34.37
  -9  -6  -1   33.25   28.79
  -1  -5   9    2.24   10.63
   9  -5   1   56.71   37.87
  -1  -5   9    3.73    6.60
  -9  -5  -1   89.94   56.60
  -1  -4   9  160.52   57.14
   9  -4   1   81.95   18.08
  -1  -4   9  155.96   31.67
   9  -4   1  149.57   62.74
  -9  -4  -1   70.11   45.03
  -1  -3   9   34.67   24.63
  -1  -3   9   32.56   12.68
   1  -2  -9  150.61   35.44
  -9  -2  -1  269.23   80.86
  -1  -1   9   14.94    9.55
   9  -1   1   95.97   42.32
   9  -1   1   80.89   34.05
   1  -1  -9   13.87   10.57
  -1   0   9 1301.75  153.20
   1   0  -9 1168.68   90.34
   9   0   1  161.36   53.92
  -9   0  -1  181.88   49.83
   9   0   1  156.56   43.21
  -1   1   9   20.00   19.86
   1   1  -9   15.36   10.19
   9   1   1  438.51   92.13
   9   1   1  380.66   65.90
  -9   1  -1   93.12   32.63
   9   1   1  357.01   66.07
   9   2   1  235.34   58.97
  -1   2   9  173.20   59.14
   9   2   1  253.25   63.65
   9   2   1  252.07   51.21
  -9   3  -1  838.07   70.85
   9   3   1  182.46   51.68
  -1   3   9   73.17   41.27
   9   3   1  202.85   59.55
  -9   3  -1  925.97  133.05
   9   4   1   69.81   34.44
  -1   4   9  124.19   54.28
  -9   4  -1  159.66   58.70
  -9   5  -1   83.34   45.99
   9   5   1   75.31   37.70
  -1   5   9   64.29   42.82
  -1   6   9  172.38   75.64
   9   6   1   21.95   23.35
   9   7   1   74.52   39.80
   9   7   1   91.68   47.25
  -9   7  -1  192.97   77.14
  -9   8  -1   54.85   43.03
   9   8   1  158.91   72.55
   9   8   1  198.51   68.39
  -1   8   9   33.83   39.73
  -9   9  -1   80.84   50.63
   9   9   1   82.75   48.95
   9   9   1   84.66   42.39
  -1   9   9  103.06   79.32
   1   9  -9  125.02   77.16
  -9  10  -1  148.97   73.51
   9  10   1    2.68   11.86
   9  10   1    4.88   30.46
   1  10  -9   -3.46   38.86
  -1  10   9   99.30   76.78
  -1  11   9  170.15  102.59
  -9  11  -1  173.35   84.92
   9  11   1  110.79   62.26
   9  11   1  103.74   69.86
   1  11  -9   86.74   68.20
  -9  12  -1   -2.68   15.28
  -1  12   9  112.26   85.48
   1  12  -9   64.01   65.45
   9  12   1  175.73   94.60
   9  13   1   27.79   16.62
  -9  13  -1   -4.04   27.93
  -1  13   9   44.44   61.34
   1  13  -9    9.23   17.76
  -9  14  -1   48.93   44.94
   9  14   1   58.23   46.76
  -1  14   9  -10.47   43.79
   1  14  -9   86.49   71.82
  -9  15  -1   67.59   51.39
   9  15   1    3.19   34.75
  -1  15   9   73.80   88.28
   1  15  -9   76.64   68.36
   9 -15   0  -13.16   34.59
   0 -15  -9   37.07   40.11
   0 -14   9  129.12   62.12
   9 -14   0   83.38   58.76
  -9 -14   0   43.34   48.21
   0 -14  -9  130.80   77.68
   0 -13   9    9.95   14.96
   0 -13   9    7.67   14.39
   9 -13   0   -6.17   35.78
   0 -13  -9   -2.05   27.37
  -9 -13   0    0.53   24.54
   0 -12   9  102.77   52.71
   0 -12   9   97.32   49.56
   9 -12   0    8.50   15.31
   0 -12  -9  105.87   63.61
  -9 -12   0   35.71   48.84
   0 -11   9  117.94   58.09
   0 -11  -9  122.87   66.59
   0 -11   9  101.72   49.07
   9 -11   0   35.87   34.38
   0 -10   9  171.81   68.20
   0 -10   9  142.09   59.43
   9 -10   0   29.71   37.85
   0 -10  -9  130.67   69.33
  -9 -10   0   65.26   53.82
   0  -9   9    7.11   16.52
   0  -9   9   -0.33   17.69
   9  -9   0   27.21   33.00
   0  -9  -9   10.29    6.75
  -9  -9   0   28.91   32.21
   0  -8  -9  101.76   58.17
   0  -8   9  123.56   54.36
   9  -8   0  232.15   91.96
   0  -8   9  134.80   55.82
  -9  -8   0   56.55   46.09
   0  -7   9  418.47   94.46
   9  -7   0  546.14  133.44
   0  -7   9  431.45   86.58
   0  -6   9    6.42   10.05
   0  -6   9    9.15   10.74
   0  -5   9  150.15   53.08
   9  -5   0  248.69   80.78
   0  -5   9  167.72   49.91
   9  -5   0  130.94   28.52
  -9  -5   0  250.42   93.51
   0  -4   9   39.19   24.13
   0  -4   9   51.94   22.24
  -9  -4   0   10.30   17.32
   0  -3   9  517.55   92.78
   0  -3   9  660.50   74.56
   9  -3   0   22.22   23.44
   9  -3   0   10.01    8.61
  -9  -3   0   23.95   20.70
   0  -2   9   21.97   18.53
  -9  -2   0  524.56   99.28
   9  -2   0  577.84   87.06
   9  -2   0  875.55  147.39
   0  -2   9   21.71   11.59
  -9  -2   0  423.35   86.96
  -9  -1   0   76.12   34.56
  -9  -1   0   81.80   38.48
   0  -1  -9  952.03   90.33
   9  -1   0    1.10    4.18
   9  -1   0    0.47    4.33
   0  -1   9 1226.62  140.51
  -9   0   0  184.57   51.52
   0   0   9    3.88   11.59
   9   0   0  191.26   57.29
   0   0  -9    1.73    5.40
  -9   0   0  196.11   52.59
   0   1   9 1150.49  144.39
  -9   1   0    7.24   10.64
   9   1   0   73.24   28.73
   0   1  -9 1163.92  103.29
   9   1   0   96.93   42.10
   9   2   0  487.51   79.91
  -9   2   0  716.79   81.98
   0   2  -9   18.47   12.78
   9   2   0  448.30   82.24
   0   2   9   14.08   19.53
  -9   3   0   13.93   10.17
   9   3   0   17.27   13.53
   9   3   0   21.03   17.94
   9   4   0   12.82   19.19
   0   4   9   38.44   35.43
   9   5   0  171.09   53.22
   0   5   9  118.11   62.44
  -9   5   0  244.11   76.81
   0   6   9    9.19   23.59
  -9   6   0   44.69   32.91
   0   7   9  370.33  119.51
  -9   7   0  546.80  127.92
   0   8   9  115.54   73.30
   9   8   0   48.67   40.53
  -9   8   0  224.77   88.46
   9   8   0   61.75   41.53
  -9   9   0   19.97   19.49
   0   9   9    5.70   21.97
   9   9   0   32.16   33.13
   9   9   0   30.54   37.46
   0   9  -9   -4.80   29.89
  -9  10   0    9.39   26.17
   9  10   0   66.98   42.41
   0  10   9  136.55   83.92
   0  10  -9  140.77   84.67
   9  10   0   86.73   59.24
  -9  11   0   38.54   28.88
   9  11   0  911.81  202.41
   9  11   0  964.83  185.08
   0  11  -9  164.49   93.24
   0  11   9  155.26  101.11
   0  12   9  111.12   93.95
  -9  12   0   13.57   30.23
   9  12   0   14.08   19.17
   9  12   0   24.15   30.25
   0  12  -9  122.18   76.26
  -9  13   0   -0.98    9.50
   9  13   0    6.99   15.86
   0  13   9    6.19   46.94
   0  13  -9  -10.66   28.95
  -9  14   0   70.01   59.60
   0  14   9  166.89  123.14
   9  14   0   45.17   55.04
   0  14  -9  125.89   89.13
  -9  15   0   -0.70   17.80
   0  15   9   61.97   75.08
   0  15  -9   26.41   45.92
  -1 -15  -9   47.15   54.14
   9 -15  -1   53.12   56.75
  -9 -15   1    1.81   16.71
  -9 -14   1   44.59   48.75
   9 -14  -1   50.81   49.31
   1 -14   9   -5.09   15.27
  -1 -14  -9   37.82   38.00
   1 -13   9   25.83   24.49
   9 -13  -1    9.93   23.96
   1 -13   9   25.20   27.04
  -1 -13  -9   48.27   45.83
  -9 -13   1   32.94   39.24
   1 -12   9   85.50   49.20
   9 -12  -1    2.11    5.23
   1 -12   9   69.12   36.57
  -1 -12  -9   67.68   58.25
  -9 -12   1  120.57   74.70
   9 -11  -1  118.41   67.79
   1 -11   9   98.14   52.89
  -1 -11  -9   57.29   51.12
   1 -11   9  149.35   65.91
  -9 -11   1   94.20   59.01
   1 -10   9   89.45   50.20
   9 -10  -1  122.12   62.00
   1 -10   9   59.92   37.50
  -9 -10   1    5.59   11.66
  -1 -10  -9   15.02    4.54
  -1  -9  -9   73.48   45.62
   1  -9   9  119.84   53.29
   9  -9  -1   71.12   53.38
   1  -9   9  133.96   57.64
  -9  -9   1  106.78   64.09
   1  -8   9   33.44   25.91
   9  -8  -1   33.11   36.85
   1  -8   9   32.49   23.53
  -1  -8  -9  222.88   90.33
  -9  -8   1  192.68   85.29
   1  -7   9  236.35   67.88
   1  -7   9  240.26   68.77
   9  -7  -1  179.10   71.10
  -1  -7  -9  326.86  101.64
   9  -7  -1  123.35   31.07
  -9  -7   1   78.71   52.45
   1  -6   9  182.19   57.38
   1  -6   9  207.94   59.90
   9  -6  -1  163.05   34.44
  -9  -6   1   22.72   25.95
  -9  -5   1   87.74   46.54
   1  -5   9   86.18   38.97
   9  -5  -1   58.89   30.63
   1  -5   9  111.78   42.14
   9  -5  -1   25.15   12.85
  -9  -4   1   65.92   37.91
   1  -4   9  133.31   46.80
   1  -4   9  145.44   42.26
   9  -4  -1  133.62   56.23
   9  -4  -1  141.72   40.73
   9  -3  -1  860.11  143.01
   1  -3   9   79.43   28.23
   9  -3  -1  577.94   93.17
  -9  -3   1  196.35   66.97
  -9  -2   1  236.02   57.41
   1  -2   9  153.44   37.10
  -9  -2   1  266.07   70.69
   1  -2   9  203.94   61.82
   9  -1  -1  113.85   43.75
   1  -1   9   14.44   12.04
   1  -1   9   14.70   12.03
  -9  -1   1  426.34   74.14
  -9  -1   1  375.37   77.27
  -9   0   1  179.79   43.95
   9   0  -1  187.50   53.37
  -9   0   1  193.89   51.23
  -9   1   1  117.69   37.59
  -9   1   1  110.08   35.08
  -1   1  -9   14.53    8.78
   1   1   9    8.82   12.42
  -9   2   1 1048.61  119.03
  -9   2   1  984.64  100.99
  -1   2  -9  141.49   41.23
   9   2  -1  234.76   57.82
   1   2   9    8.61   14.75
   9   2  -1  250.71   49.12
   9   3  -1  142.95   38.22
   1   3   9   34.22   31.87
  -1   3  -9   66.42   28.78
   9   3  -1  192.12   55.19
   9   4  -1   64.15   28.75
   1   4   9  132.60   58.98
   1   5   9    5.80   21.78
   9   5  -1   77.90   35.97
  -9   5   1   83.69   44.54
   9   6  -1   24.81   21.82
   1   6   9   79.38   53.81
   9   7  -1   48.53   38.36
   1   7   9  348.98  117.11
  -9   7   1  227.52   83.76
  -9   8   1   67.19   50.64
  -1   8  -9   26.01   28.14
  -9   9   1   49.88   42.28
   9   9  -1  101.40   61.89
   1   9   9  107.76   72.33
  -1   9  -9  101.66   66.71
   9   9  -1   83.37   54.55
  -9  10   1  165.19   81.44
   9  10  -1   27.02   46.23
   1  10   9   34.67   45.58
   9  10  -1   23.42   27.96
  -1  10  -9  132.21   83.33
  -9  11   1  177.62   87.78
   1  11   9   78.51   74.14
   9  11  -1  114.16   69.85
   9  11  -1  117.99   61.51
  -1  11  -9  121.38   75.32
  -9  12   1   20.76   25.02
   9  12  -1  155.80   85.19
   9  12  -1  170.63   79.44
  -1  12  -9   90.49   67.99
   1  12   9   58.98   64.61
  -9  13   1    9.99   31.58
   9  13  -1   11.38   11.71
   9  13  -1   25.94   35.24
   1  13   9   71.71   78.62
  -1  13  -9    3.29   22.02
   1  14   9   90.73   89.15
  -1  14  -9    3.23   39.01
  -9  14   1   40.01   42.46
   9  14  -1   47.28   29.46
   9  15  -1    8.84   13.90
   1  15   9   64.97   56.46
  -9  15   1   86.96   64.54
  -1  15  -9   73.21   67.60
  -9 -15   2   15.56   21.25
   2 -15   9   23.61   27.60
  -2 -15  -9    6.50   12.05
  -9 -14   2   89.54   67.32
   9 -14  -2   89.91   69.54
   2 -14   9   83.66   59.00
  -2 -14  -9   38.48   31.89
  -9 -13   2  -10.98   30.14
   9 -13  -2    9.75    6.18
   2 -13   9   19.87   27.52
  -2 -13  -9   40.43   35.51
  -9 -12   2   60.10   45.27
  -2 -12  -9   52.98   42.69
   2 -12   9   95.57   52.73
   9 -12  -2   43.86   30.66
   2 -12   9   81.13   49.04
  -9 -11   2   10.54    7.38
   2 -11   9   51.04   31.37
   9 -11  -2   98.82   57.45
   2 -11   9   47.84   42.69
  -2 -11  -9   10.11   29.62
  -9 -10   2   30.25   31.18
   2 -10   9  267.20   74.16
   2 -10   9  266.27   91.66
   9 -10  -2  180.79   79.19
  -2 -10  -9  179.14   83.53
  -9  -9   2  107.02   59.06
   2  -9   9   35.77   28.29
   9  -9  -2   58.95   40.25
   2  -9   9   28.34   20.38
  -2  -9  -9   42.08   41.44
  -9  -8   2   33.34   31.52
   2  -8   9   60.86   35.76
   9  -8  -2  248.10   84.11
   2  -8   9   63.53   38.99
   9  -8  -2  197.23   48.68
  -2  -8  -9    6.32   15.74
  -9  -7   2  125.53   61.09
   2  -7   9  367.45   78.45
   9  -7  -2  478.08  116.32
   2  -7   9  422.31   97.15
  -2  -7  -9   91.06   57.11
   2  -6   9  215.36   57.64
   9  -6  -2  235.39   82.53
   2  -6   9  292.10   78.14
  -2  -6  -9  231.60   80.19
  -9  -6   2  210.21   72.87
   9  -6  -2  119.05   32.43
   2  -5   9  213.07   56.52
   2  -5   9  333.06   82.37
   9  -5  -2  381.80   61.18
   9  -4  -2  267.57   78.47
   9  -4  -2  176.19   45.65
   9  -3  -2  153.33   62.14
  -9  -3   2  126.93   53.16
   2  -2   9  143.16   40.55
   2  -2   9  159.48   56.96
  -9  -2   2  110.18   47.00
  -9  -1   2   82.80   36.37
  -9  -1   2   88.03   27.19
   2  -1   9    5.88   12.53
   2  -1   9    2.79    9.25
  -9   0   2  236.67   62.30
   9   0  -2  264.46   62.08
  -9   0   2  240.72   45.22
  -9   1   2  374.40   69.55
   2   1   9  170.89   59.07
  -9   1   2  385.98   58.62
   9   1  -2   70.59   30.92
  -9   2   2  326.76   60.96
  -9   2   2  365.93   70.27
   2   2   9  123.93   55.34
   9   2  -2  120.13   38.77
   9   2  -2  128.13   28.95
   9   3  -2  127.16   31.21
   2   3   9  118.01   59.12
  -9   3   2  133.33   36.42
   9   3  -2  168.49   50.52
  -9   3   2  162.84   45.47
   9   4  -2  419.83   68.39
   2   4   9    5.10   16.28
   2   5   9  475.49  114.14
   9   5  -2   14.28   14.48
   2   6   9  227.96   87.36
   9   6  -2  209.12   61.70
  -9   6   2  289.35   92.61
   2   7   9  137.00   67.56
   9   7  -2  159.07   57.94
  -2   7  -9  444.22  135.24
  -9   7   2  546.74  132.42
   2   8   9    5.44   22.04
  -2   8  -9   66.61   57.19
   9   8  -2   38.18   20.54
  -9   9   2  127.94   67.96
   2   9   9   60.73   57.73
   9   9  -2   88.53   51.84
  -2   9  -9   66.83   51.19
   9  10  -2   53.31   47.90
  -2  10  -9  268.17  111.63
   2  10   9  247.86  112.53
   9  10  -2   44.58   29.31
  -9  10   2  259.05   99.56
   9  11  -2    1.81   13.51
   2  11   9  -19.56   42.15
  -2  11  -9   47.51   49.74
   9  11  -2    9.08   30.68
  -9  12   2   31.56   36.68
   9  12  -2   42.18   44.93
   2  12   9   42.64   36.84
   9  12  -2   59.61   52.91
  -2  12  -9   99.34   68.16
  -9  13   2   14.85   19.98
   9  13  -2    1.41   22.19
  -2  13  -9   11.60   26.75
   9  13  -2    3.12   18.05
   2  13   9   62.33   68.41
  -9  14   2  137.59   91.44
   9  14  -2  133.73   80.03
  -2  14  -9  140.88   91.74
   9  14  -2   92.07   64.84
   2  14   9   91.12   74.63
  -9  15   2   47.69   53.72
   9  15  -2   17.19   23.53
  -2  15  -9   32.21   51.28
   2  15   9   -4.06   25.72
  -9 -15   3   17.40   18.13
  -3 -15  -9   13.21   12.08
   9 -15  -3    1.71   12.01
   3 -15   9   54.80   45.29
  -9 -14   3    0.57   15.65
   9 -14  -3   19.62   18.07
   3 -14   9   22.19   24.49
  -9 -13   3  179.97   85.97
   9 -13  -3   73.44   56.78
   3 -13   9   44.94   35.73
  -3 -13  -9   35.44   23.28
  -9 -12   3  104.83   68.08
   9 -12  -3  127.15   70.23
   3 -12   9   70.06   48.68
  -3 -12  -9   35.94   36.54
  -9 -11   3  129.98   69.96
   9 -11  -3   14.91   21.69
   3 -11   9   49.00   43.05
  -3 -11  -9  150.22   79.57
  -9 -10   3   82.67   53.72
   3 -10   9    2.28   11.35
   9 -10  -3   29.20   30.75
   3 -10   9    4.40   27.25
  -3 -10  -9  114.58   66.21
  -9  -9   3  138.82   69.89
   3  -9   9  118.58   46.56
   9  -9  -3  106.38   61.98
   3  -9   9  142.43   68.18
  -3  -9  -9  243.94   95.95
   3  -8   9  295.97   68.77
  -3  -8  -9  175.79   77.82
   3  -8   9  358.00   94.60
   9  -8  -3   99.66   50.72
  -9  -8   3  181.19   76.96
   3  -7   9   66.86   32.86
   9  -7  -3   12.31   27.78
   3  -7   9   92.16   52.07
  -3  -7  -9   38.39   38.13
  -9  -6   3  176.96   68.34
   3  -6   9  218.85   72.61
   9  -6  -3   27.68   26.38
  -3  -6  -9  225.13   90.70
  -9  -5   3   89.04   44.54
   9  -5  -3   16.82   13.12
   3  -5   9   71.64   40.19
   3  -4   9  189.97   54.48
   9  -4  -3   49.14   27.76
   9  -3  -3   -1.53   15.23
   3  -3   9    5.54    6.03
  -9  -2   3   71.55   35.41
   9  -2  -3  157.60   56.62
   3  -2   9  144.12   49.21
   3  -2   9  152.99   60.42
  -9  -1   3    7.00   11.34
   3  -1   9   33.48   26.62
   3  -1   9   33.65   25.04
  -9   0   3  193.22   55.97
   3   0   9  661.91  124.17
   3   0   9  620.27   96.00
   9   0  -3  128.30   42.28
  -9   0   3  135.13   28.23
  -9   1   3  208.67   57.41
  -9   1   3  189.32   35.48
   3   1   9   63.82   37.53
   9   1  -3    4.97   10.43
  -9   2   3  126.77   38.80
   9   2  -3   73.27   30.76
  -9   2   3  141.38   35.18
   9   3  -3  280.10   40.73
   3   3   9    5.60   15.00
  -9   3   3    4.35    4.78
   9   3  -3  327.49   65.41
   9   4  -3  388.24   56.63
   3   4   9   96.86   52.49
   9   5  -3   41.35   21.52
   3   5   9  154.44   67.12
  -3   5  -9   79.88   61.96
   3   6   9  206.77   82.99
  -3   6  -9  193.68   98.13
   9   6  -3  166.00   54.55
  -3   7  -9   75.36   53.74
   3   7   9   37.62   41.89
  -9   7   3   -4.39   12.61
   3   8   9  150.40   77.48
   9   8  -3  187.81   69.53
  -3   8  -9  309.50  109.57
  -9   8   3   95.61   62.71
  -9   9   3  123.73   70.36
  -3   9  -9  139.18   73.94
   3   9   9  356.45  131.48
   9   9  -3  142.50   64.48
  -9  10   3   14.49   17.98
   3  10   9  194.61  105.31
   9  10  -3   63.50   41.82
  -3  10  -9   14.28   29.59
   9  10  -3  131.78   78.26
  -9  11   3   29.95   44.18
   3  11   9  217.99  113.09
   9  11  -3   99.77   60.36
  -3  11  -9   60.73   59.61
   9  11  -3  113.75   76.71
  -9  12   3  101.29   61.85
   9  12  -3  107.82   68.20
   3  12   9   55.43   56.11
  -3  12  -9   49.81   55.37
   9  12  -3  152.07   92.37
  -9  13   3   97.07   73.30
   9  13  -3  166.41   81.52
   3  13   9   58.96   68.05
  -3  13  -9   91.01   69.52
   9  13  -3  208.64  100.79
  -9  14   3   -6.67   26.82
  -3  14  -9   40.44   58.20
   3  14   9  124.85  111.03
   9  14  -3   11.95   36.57
  -9  15   3   12.33   40.82
   9  15  -3   30.32   37.50
  -3  15  -9   73.69   75.72
   3  15   9   45.50   57.43
  -9 -14   4    0.69   12.02
   9 -14  -4   24.97   31.13
   4 -14   9   49.09   44.97
  -4 -14  -9   -1.27    4.01
  -9 -13   4   45.00   33.04
   4 -13   9   16.81   25.17
  -4 -13  -9    2.83   30.36
  -9 -12   4   35.63   44.94
   9 -12  -4  108.68   62.50
   4 -12   9  168.37   82.71
  -4 -12  -9   73.49   55.58
  -9 -11   4   31.21   35.74
   9 -11  -4   77.13   57.68
   4 -11   9   10.60   13.81
  -4 -11  -9  140.85   76.60
  -9 -10   4  123.95   65.59
   9 -10  -4   57.08   50.68
   4 -10   9   56.48   42.73
  -4 -10  -9   -3.81    2.93
  -9  -9   4  125.73   59.92
   4  -9   9  202.52   53.68
   4  -9   9  246.52   83.51
   9  -9  -4  103.05   54.76
  -4  -9  -9   -7.49   15.13
  -9  -8   4   42.37   31.29
   9  -8  -4  164.54   67.98
   4  -8   9  155.86   69.54
  -4  -8  -9   92.39   55.86
  -9  -7   4    5.12   14.23
   9  -7  -4   12.38   20.68
   4  -7   9   56.77   39.87
  -4  -6  -9    5.77   19.15
   9  -6  -4   45.95   35.88
   4  -6   9   41.78   34.37
   9  -5  -4  261.81   80.95
   4  -5   9  228.07   74.32
  -4  -5  -9   96.44   55.37
  -9  -4   4   30.57   23.53
  -4  -4  -9   63.30   40.82
   4  -4   9   99.51   43.98
  -4  -4  -9  108.57   36.89
  -9  -3   4   54.44   34.14
   9  -3  -4   27.24   19.03
   4  -3   9   86.56   36.57
   4  -2   9   20.76   21.12
   4  -2   9   11.68    6.14
   9  -1  -4  164.53   51.33
   4  -1   9  170.35   49.30
   4  -1   9  176.86   61.55
  -9   0   4  624.78  103.57
   4   0   9   52.08   33.77
   9   0  -4  536.26   83.08
   4   0   9   37.62   24.15
   4   1   9  171.61   64.78
  -9   1   4  164.12   55.64
  -9   2   4  144.56   48.20
  -9   2   4  144.67   30.66
  -9   3   4   32.33   21.08
   4   3   9  149.19   65.14
   4   4   9  101.15   54.92
  -4   4  -9   85.97   55.80
   9   4  -4   32.94   13.76
   4   5   9   89.63   50.41
  -4   5  -9  175.46   79.25
   4   6   9    4.09    5.25
  -4   6  -9   30.45   35.85
   9   7  -4    7.20   11.09
  -4   7  -9   53.12   45.03
  -4   8  -9   83.19   52.58
   9   8  -4   39.91   32.33
   4   8   9  123.56   73.79
   4   9   9   20.44   29.92
  -4   9  -9  192.38   93.63
   9   9  -4  133.17   59.03
  -9   9   4  126.69   67.16
   4  10   9    5.52   26.50
   9  10  -4  112.11   54.48
  -4  10  -9   35.32   38.75
  -9  10   4   47.06   42.75
   4  11   9  141.64   96.27
  -4  11  -9    3.63   11.69
   9  11  -4   18.44   11.43
  -9  11   4   99.76   69.08
  -9  12   4  134.51   83.03
   4  12   9   60.26   71.15
  -4  12  -9  186.41  100.03
   9  12  -4   17.71   33.56
   4  13   9   15.91   13.48
  -4  13  -9    7.28   21.37
   9  13  -4   70.58   51.79
  -9  14   4  -15.07   32.93
   4  14   9   12.79   34.57
  -4  14  -9   19.24   48.29
   9  14  -4   17.13   46.62
  -9 -14   5   21.72   30.19
   5 -14   9   17.47   30.98
  -5 -14  -9   38.94   52.32
   9 -13  -5   50.71   49.97
   5 -13   9   41.12   36.71
  -5 -13  -9   29.33   31.76
  -9 -12   5   23.43   19.51
  -5 -12  -9  119.98   67.81
   9 -12  -5  150.86   70.79
   5 -12   9   29.85   40.40
  -9 -11   5   27.91   28.91
   9 -11  -5   12.58   11.68
  -5 -11  -9   85.16   54.66
   9 -10  -5    8.12   19.23
  -5 -10  -9   -2.31    7.08
  -9  -9   5   25.94   29.34
  -5  -9  -9    3.32    5.22
   9  -9  -5   39.66   27.46
   5  -9   9   75.43   54.14
   9  -8  -5  129.69   57.47
   5  -8   9   64.09   45.41
  -5  -8  -9  123.93   70.40
  -9  -8   5  208.55   79.82
   5  -7   9  277.46   90.54
   9  -7  -5   44.70   29.21
  -5  -7  -9  165.33   76.44
  -9  -7   5  237.66   84.71
   5  -6   9  316.56   95.70
   9  -6  -5    2.89    7.79
  -5  -6  -9   26.27   31.23
  -9  -6   5  207.01   74.07
  -9  -5   5  120.84   51.28
   9  -5  -5  115.37   54.17
   5  -5   9   31.95   26.96
  -5  -5  -9   43.26   39.80
   9  -4  -5  125.29   51.15
  -5  -4  -9  170.24   72.13
   5  -4   9   99.80   47.66
  -5  -4  -9  161.94   41.46
  -5  -3  -9   73.52   26.45
   9  -3  -5  200.75   60.97
  -5  -3  -9   61.26   39.26
   5  -3   9  181.54   57.94
  -9  -2   5  198.08   67.40
   9  -2  -5  182.59   55.66
   5  -2   9  552.78  104.13
   5  -2   9  571.51  122.34
   5  -1   9   -0.53    2.78
   5  -1   9   -0.25    9.51
  -9   0   5  113.63   51.49
   5   0   9  142.06   58.64
   9   0  -5   87.34   31.94
   5   0   9  129.40   50.05
  -9   1   5   65.26   32.73
   5   1   9   79.67   46.79
   9   1  -5   26.12   15.91
   5   1   9   84.90   40.15
   5   2   9  176.55   71.49
  -9   2   5  158.96   52.39
  -9   2   5  105.64   27.90
   9   2  -5  159.83   40.60
  -9   2   5  135.44   25.84
  -9   3   5  132.86   43.21
  -5   3  -9  157.59   62.83
   5   3   9   37.84   36.20
   5   4   9  198.23   78.57
  -5   4  -9   74.71   45.07
   5   5   9   40.52   31.77
   9   5  -5   96.52   28.24
  -5   5  -9   27.93   26.09
  -5   6  -9  147.11   71.65
   5   6   9   39.08   38.39
   9   6  -5  231.27   56.92
   9   7  -5  214.00   61.17
  -5   7  -9  219.94   86.21
   5   7   9  165.67   80.52
   9   8  -5  211.39   65.77
   5   8   9  169.71   90.91
  -5   8  -9   41.86   43.12
  -5   9  -9   35.18   42.81
   5   9   9   15.30   17.14
   5  10   9    2.15   33.80
  -5  10  -9   74.40   63.78
   5  11   9  113.02   79.58
  -5  11  -9  154.06   88.55
   9  11  -5   52.69   47.86
  -9  11   5   28.39   40.19
   5  12   9  136.27   98.84
  -5  12  -9   36.57   48.79
   9  12  -5   70.26   65.41
  -9  12   5  179.51   94.16
   5  13   9   46.47   60.22
  -5  13  -9   13.94   14.73
  -9  13   5   49.66   49.51
   5  14   9  -11.94   23.76
  -5  14  -9   10.62    9.22
   9  14  -5   -3.33   26.19
  -9  14   5   -6.87   41.10
  -9 -14   6  148.73   79.97
   6 -14   9   58.31   61.06
  -6 -14  -9   40.78   38.32
  -9 -13   6   -7.76   28.41
   6 -13   9   -8.79   25.89
  -9 -12   6   37.11   38.39
   6 -12   9   51.16   40.42
  -6 -12  -9   19.19   38.70
  -9 -11   6   20.71   38.15
   9 -11  -6   28.61   22.09
   6 -11   9   39.84   43.87
  -6 -11  -9   20.72   26.05
  -9 -10   6  160.73   73.67
   9 -10  -6   97.00   55.45
   6 -10   9  114.28   66.16
  -6 -10  -9  175.80   85.64
  -9  -9   6   87.79   52.57
  -6  -9  -9  234.08   96.80
   9  -9  -6   98.76   55.55
   6  -9   9   56.99   46.51
  -9  -8   6  131.00   59.32
   9  -8  -6  152.57   62.69
   6  -8   9    2.86   28.56
  -6  -8  -9   12.66   20.73
  -6  -7  -9   48.26   42.63
  -9  -7   6   74.12   45.67
  -9  -6   6   97.30   51.41
   9  -6  -6    9.08   12.90
   6  -6   9  217.47   86.89
  -6  -6  -9  140.01   70.29
  -9  -5   6   33.86   28.91
  -6  -5  -9  132.85   62.26
   6  -5   9   48.98   35.12
   6  -4   9    0.46    4.73
  -6  -4  -9   23.58   26.29
  -9  -3   6  240.92   76.74
   9  -3  -6   30.73   26.15
   6  -3   9  219.00   69.50
  -6  -3  -9  181.77   70.40
  -9  -2   6   80.11   42.63
   6  -2   9  265.15   79.20
   9  -2  -6   27.08   21.77
  -6  -2  -9  263.86   84.67
   6  -2   9  264.69   82.99
  -9  -1   6    2.86   12.08
   6  -1   9   77.32   42.35
  -6  -1  -9  125.07   52.85
   6  -1   9   61.38   34.23
  -9   0   6  382.09   89.68
   6   0   9   10.00   12.73
   9   0  -6  315.55   55.71
   6   0   9    0.72    8.28
  -6   0  -9    2.36    8.25
  -6   1  -9   82.98   39.84
   6   1   9  191.18   69.24
   6   1   9  162.82   62.26
   9   1  -6    6.10    2.31
   6   2   9  224.49   75.06
  -9   2   6   21.17   21.75
  -6   2  -9  212.21   65.97
  -9   2   6   18.58    8.41
  -9   2   6   14.49    8.13
  -9   3   6   46.76   24.14
   6   3   9  138.01   66.15
   6   4   9   22.78   31.45
  -6   4  -9   11.72   19.04
   6   5   9  224.34   91.15
  -6   5  -9   18.15   20.13
   6   6   9  143.02   72.54
  -6   6  -9  159.12   71.47
  -6   7  -9  581.43  137.84
   6   7   9   61.71   49.62
  -6   8  -9   10.31   16.48
   6   8   9    7.04   29.08
   6   9   9  331.47  128.01
  -6   9  -9   49.13   47.93
  -6  10  -9  119.31   75.04
   6  10   9  202.96   99.53
  -6  11  -9   -6.38   26.36
   6  11   9   21.16   29.83
   6  12   9    7.43   21.22
  -6  12  -9   30.67   27.37
   9  12  -6   39.49   17.52
   6  13   9   96.12   81.93
  -6  13  -9   -9.08   28.99
   9  13  -6   -9.49   41.72
   6  14   9   71.03   65.62
  -6  14  -9   37.73   53.45
   9  14  -6  228.75  126.41
  -9  14   6   59.31   53.41
  -9 -13   7   30.40   48.28
   7 -13   9   39.12   35.83
  -7 -13  -9   38.21   33.42
  -9 -12   7   17.81   32.43
   7 -12   9   10.36    5.11
  -7 -12  -9   36.08   46.94
  -9 -11   7    3.93    2.81
  -7 -11  -9    2.24   18.82
  -9 -10   7   60.26   38.35
   9 -10  -7  126.15   62.48
   7 -10   9   97.11   65.55
  -7 -10  -9  185.60   87.74
  -9  -9   7   -7.11    7.77
   9  -9  -7   -2.03    8.03
   7  -9   9   90.07   60.78
  -7  -9  -9   65.32   43.98
  -9  -8   7   48.78   37.02
   9  -8  -7   34.74   30.34
  -7  -8  -9   -4.70   11.82
  -9  -7   7   65.13   45.65
   7  -7   9   53.43   48.43
  -7  -7  -9   11.64   13.18
  -9  -6   7   28.60   31.35
   9  -6  -7  827.08  135.55
   7  -6   9   55.62   38.74
  -7  -6  -9  521.03  137.10
  -9  -5   7   31.85   24.10
   9  -5  -7    7.68   15.20
   7  -5   9  182.76   69.88
  -7  -5  -9  158.39   75.00
  -9  -4   7   11.06   21.16
   9  -4  -7   70.21   39.78
  -7  -4  -9   45.32   38.22
  -7  -3  -9   38.32   30.82
   7  -3   9   29.57   24.05
   7  -2   9  143.47   59.35
  -9  -2   7  158.18   63.49
  -7  -2  -9  233.05   35.02
  -7  -2  -9  305.20   91.66
   7  -2   9  141.34   59.77
  -9  -1   7  275.97   82.18
  -7  -1  -9  155.13   36.44
   7  -1   9  361.96   88.37
   9  -1  -7   55.51   25.22
  -7  -1  -9  197.82   68.39
   7  -1   9  390.24  101.47
   9   0  -7   42.52   20.23
  -9   0   7   40.63   31.87
  -7   0  -9  340.16   63.66
   7   0   9  396.16   92.76
  -7   0  -9  343.59   89.45
   7   0   9  352.78   93.92
   7   1   9  237.80   83.00
  -9   1   7   58.93   37.45
  -7   1  -9  325.06   68.87
   9   1  -7  252.08   43.76
  -7   1  -9  265.30   73.86
   7   1   9  257.09   78.13
   7   2   9  346.92   98.57
  -9   2   7  449.68   94.16
  -7   2  -9   84.02   39.19
   7   2   9  384.06  100.19
  -7   3  -9   21.92   19.52
   7   3   9   28.29   27.54
  -7   4  -9  165.87   65.08
  -9   4   7   65.33   35.02
   7   4   9   37.97   41.06
   7   5   9  207.73   87.56
  -7   5  -9  196.07   74.45
  -9   5   7    2.42   13.20
   7   6   9  587.94  149.23
  -7   6  -9   40.11   31.90
   7   7   9   29.43   32.19
  -7   7  -9   19.76   26.85
  -7   8  -9  323.28  113.98
   7   8   9   -7.02   32.23
  -7   9  -9   63.89   54.68
   7   9   9  106.62   69.48
  -7  10  -9   94.10   67.46
   7  10   9  148.63   94.49
  -7  11  -9   40.97   41.83
   7  11   9    9.22   17.06
  -7  12  -9   16.04   32.90
   9  12  -7   51.92   59.22
   7  12   9   22.15   39.03
  -7  13  -9   50.29   57.25
   9  13  -7   44.23   55.43
   7  13   9   -2.07   19.10
   8 -13   9   -2.38   23.85
  -8 -13  -9   15.83    6.70
  -9 -12   8    2.36   30.33
   8 -12   9   10.06   32.90
  -8 -12  -9   -0.46   38.90
   8 -11   9   42.18   50.60
  -8 -11  -9   63.52   53.20
  -9 -10   8   59.12   48.44
   9 -10  -8   17.74   26.18
   8 -10   9   14.02   14.65
  -8 -10  -9   -9.45   19.19
  -9  -9   8  204.23   87.87
   9  -9  -8  130.55   61.15
   8  -9   9  110.99   64.53
  -8  -9  -9   32.47   44.98
  -9  -8   8   21.25   17.39
   9  -8  -8    1.33   11.38
   8  -8   9  139.17   80.77
  -8  -8  -9  102.77   58.63
  -9  -7   8  171.58   78.55
   9  -7  -8   43.40   29.87
   8  -7   9  -13.51   30.18
  -8  -7  -9  201.03   84.61
   9  -6  -8   16.62   14.19
   8  -6   9    4.92    5.71
  -8  -6  -9   21.16   33.61
  -9  -5   8  101.19   53.35
   9  -5  -8  105.20   48.03
   8  -5   9  153.40   68.48
  -8  -5  -9   38.80   36.59
  -9  -4   8    0.50    9.04
   9  -4  -8  139.65   56.78
  -8  -4  -9   96.56   50.91
   8  -4   9  116.86   57.85
  -9  -3   8  127.89   63.87
   9  -3  -8  245.59   63.56
   8  -3   9  169.31   66.72
  -8  -3  -9  240.16   85.20
  -8  -2  -9   43.19   37.45
  -9  -2   8  248.30   86.93
   9  -2  -8  305.19   66.61
   8  -2   9    1.60   12.78
  -9  -1   8  248.02   79.37
   8  -1   9  285.00   83.29
  -8  -1  -9   20.30   22.18
   9  -1  -8   56.19   23.21
   8  -1   9  309.91   93.26
  -8   0  -9   86.74   31.38
  -9   0   8  114.33   54.95
   8   0   9  107.95   54.71
   9   0  -8  125.25   31.66
  -8   0  -9   81.15   40.92
   8   0   9  101.13   50.93
  -8   1  -9  234.40   56.95
  -9   1   8   45.03   29.36
   8   1   9   39.71   41.61
  -8   1  -9  197.02   64.45
   8   1   9   33.94   30.98
  -8   2  -9    3.12   10.42
   8   2   9   61.85   42.44
  -8   2  -9    3.35   12.83
   8   2   9   70.93   45.52
   8   3   9  298.81   93.69
  -8   3  -9  185.86   63.82
  -8   3  -9  154.35   52.87
  -8   4  -9  117.43   51.61
  -8   4  -9   98.20   38.38
   8   4   9  109.20   58.66
  -8   5  -9  154.77   66.61
   8   5   9   48.25   41.76
   8   6   9   18.42   31.57
  -9   6   8   23.52   17.03
  -8   6  -9   11.93   16.66
  -8   7  -9    1.28   12.87
  -9   7   8   39.79   31.32
   8   8   9   83.70   58.41
  -8   8  -9  139.43   72.07
  -9   8   8    1.46   18.68
  -8   9  -9  117.35   74.18
   8   9   9   36.44   41.96
  -9   9   8  133.49   77.99
  -8  10  -9    3.35    4.96
   8  10   9   11.27   26.35
  -8  11  -9   30.52   23.47
   8  11   9   85.52   66.53
  -8  12  -9   15.02   31.14
   8  12   9   44.92   53.53
  -8  13  -9   -3.41   24.60
   8  13   9   -5.64   40.07
  -9 -12   9   49.27   49.41
   9 -12   9   28.48   41.55
  -9 -12  -9   48.42   51.85
  -9 -11   9   35.34   37.46
  -9 -11  -9   21.05   13.00
  -9 -10   9    3.02    5.83
   9 -10  -9   16.99   31.66
   9 -10   9   22.99    3.08
  -9 -10  -9    8.08   18.79
  -9  -9   9   26.16   36.82
   9  -9  -9   49.36   45.79
   9  -9   9   15.97   43.35
  -9  -9  -9    7.44   21.59
  -9  -8   9  101.48   54.41
   9  -8  -9   34.04   34.13
   9  -8   9   68.72   50.41
  -9  -8  -9   84.42   54.81
  -9  -7   9  112.50   65.75
   9  -7  -9  113.89   54.71
   9  -7   9  171.77   88.26
  -9  -7  -9   82.61   59.79
  -9  -6   9   42.82   38.85
   9  -6  -9  263.84   76.86
   9  -6   9  328.00  109.49
  -9  -6  -9   25.49   32.04
  -9  -5   9   82.46   50.42
  -9  -5  -9   49.01   36.67
   9  -5  -9   16.57   19.37
   9  -5   9    4.11   18.91
  -9  -4   9  238.41   94.47
   9  -4  -9    7.12    1.89
   9  -4   9    8.28    8.43
  -9  -4  -9  157.98   71.05
  -9  -3   9  165.96   73.52
   9  -3   9  269.09   91.91
  -9  -3  -9   89.83   51.28
  -9  -2   9   48.73   39.74
   9  -2   9   41.85   26.42
  -9  -2  -9   33.53   29.17
   9  -1   9   87.85   61.12
  -9  -1   9  101.38   53.08
  -9  -1  -9   54.42   36.01
   9  -1   9   88.75   47.41
   9   0   9    6.89   16.83
  -9   0   9   -1.54    8.28
  -9   0  -9    6.60   11.68
   9   0   9    6.42   17.46
  -9   1   9   75.17   43.19
   9   1   9   89.70   52.04
  -9   1  -9   58.82   35.39
   9   1   9  136.85   62.10
  -9   2  -9   76.16   38.79
   9   2   9   31.59   28.55
  -9   2  -9   49.31   30.29
   9   2   9   40.82   41.89
   9   3   9  101.34   56.64
  -9   3  -9  194.26   58.48
   9   4   9  209.70   83.63
  -9   4  -9    3.02    5.75
  -9   5  -9    3.55    6.86
   9   5   9   43.89   44.83
   9   6   9   29.43   35.46
  -9   6  -9  338.24  109.02
   9   7   9  100.84   69.53
  -9   7  -9  137.41   75.45
   9   8   9  108.95   72.15
  -9   8  -9   49.81   46.65
   9   9   9   13.17   18.94
  -9   9  -9   30.88   47.54
  -9  10  -9   37.21   37.85
   9  10   9   14.40   36.01
  -9  11  -9  150.03   91.24
   9  11   9   18.41   43.46
  -9  12  -9   10.67   24.95
   9  12   9   11.98   11.94
  -9 -11  10   -2.89   16.75
  10 -11   9   10.81   22.53
 -10 -11  -9   36.60   39.83
  -9 -10  10   33.27   54.65
   9 -10 -10  124.63   67.31
  10 -10   9  172.80   88.80
 -10 -10  -9  125.31   79.30
  -9  -9  10    6.63   17.23
  10  -9   9   31.73   40.17
 -10  -9  -9   12.63   22.64
  -9  -8  10   18.93   19.18
  10  -8   9    2.82   21.92
 -10  -8  -9   23.04   39.71
  -9  -7  10   32.91   38.08
 -10  -7  -9   64.12   49.67
  -9  -6  10   64.65   47.91
  10  -6   9  229.23   90.91
 -10  -6  -9   76.38   52.51
  -9  -5  10   52.72   42.94
  10  -5   9   -7.29   11.82
 -10  -5  -9   67.06   47.24
  10  -4   9   -0.04   21.55
 -10  -4  -9   36.14   35.21
  -9  -3  10  203.44   79.06
 -10  -3  -9   -0.65    5.67
  10  -3   9  162.06   74.70
  -9  -2  10   97.92   62.63
 -10  -2  -9  154.26   60.02
  10  -2   9  207.15   88.65
  10  -1   9   11.49   13.29
  -9  -1  10    9.45   20.27
  10  -1   9   14.36   21.60
 -10  -1  -9   38.39   28.14
  10   0   9  124.80   68.28
  -9   0  10  130.37   60.99
 -10   0  -9   95.24   47.28
  10   0   9  139.59   64.55
 -10   1  -9   15.87   20.14
  10   1   9   50.35   37.71
  10   1   9   70.36   44.71
  10   2   9  234.66   86.23
  10   2   9  335.05  102.70
  10   3   9   17.27   26.94
  10   4   9   51.88   44.86
 -10   5  -9    3.27   16.58
  10   5   9  101.52   63.35
 -10   6  -9  274.98   92.35
  10   6   9  108.96   62.97
  10   7   9   71.43   54.28
 -10   7  -9  250.54   96.57
  10   8   9   14.66   26.05
 -10   8  -9  -11.64   27.71
  10   9   9   42.77   53.63
 -10   9  -9   28.05   32.91
  10  10   9  166.78   97.49
 -10  10  -9  164.38   93.12
 -10  11  -9  -15.08   40.66
  10  11   9   22.47   48.85
  -8 -12  10   67.57   49.18
  10 -12   8   32.41   34.56
   8 -12 -10   61.09   43.76
 -10 -12  -8   65.32   62.94
  -8 -11  10   12.51   27.07
  10 -11   8  138.52   83.86
 -10 -11  -8   52.78   46.95
  -8 -10  10   37.74   39.20
  10 -10   8  124.30   73.81
 -10 -10  -8   78.95   58.31
  10  -9   8   50.71   49.73
 -10  -9  -8    7.43    3.37
  -8  -8  10   27.77   22.74
  10  -8   8    0.92   22.62
 -10  -8  -8   49.75   45.39
  -8  -7  10    2.04   12.61
 -10  -7  -8   11.49   13.62
  -8  -6  10   78.73   56.49
   8  -6 -10   47.19   33.45
  10  -6   8   49.20   46.63
 -10  -6  -8   42.08   37.47
  -8  -5  10  167.39   81.13
  10  -5   8  101.62   56.06
 -10  -5  -8    7.71   25.96
  -8  -4  10   58.37   42.83
  10  -4   8  131.38   63.20
 -10  -4  -8  153.34   66.78
  10  -3   8  130.00   58.98
  -8  -3  10   29.92   27.01
 -10  -3  -8   39.82   38.23
  10  -2   8   63.96   45.47
 -10  -2  -8    5.40   15.78
  10  -1   8   38.91   23.82
  -8  -1  10   -0.28   11.03
  10  -1   8   30.00   24.33
 -10  -1  -8   18.95   18.32
  10   0   8  132.53   60.15
  -8   0  10   45.60   32.20
  10   0   8  104.09   54.63
 -10   0  -8   42.48   29.94
  -8   1  10   21.90   20.60
  10   1   8   27.34   34.61
 -10   1  -8   22.36   22.73
  10   1   8   30.38   23.94
  10   2   8   25.49   34.39
 -10   2  -8   28.56   18.56
  10   2   8   22.38   32.52
  10   3   8   74.30   49.09
 -10   3  -8  145.49   52.46
 -10   4  -8  178.76   65.43
  10   4   8  221.48   82.65
 -10   5  -8  106.48   49.40
  10   5   8    5.72   19.94
 -10   6  -8   48.05   34.59
  10   6   8   36.57   35.46
 -10   7  -8  167.69   77.13
  10   7   8   38.04   43.35
  10   8   8   54.97   50.54
 -10   8  -8   17.84   25.01
  10   9   8   37.70   43.46
 -10   9  -8   56.35   52.11
 -10  10  -8  128.93   76.04
  10  10   8  117.07   76.09
 -10  11  -8   75.31   60.80
  10  11   8   68.54   63.77
 -10  12  -8   18.12   32.78
  10  12   8   88.91   73.80
  10 -13   7   -9.81   21.97
   7 -13 -10   -3.25   15.15
 -10 -13  -7   50.06   43.29
   7 -12 -10    1.91   11.70
  -7 -12  10   13.46   24.67
  10 -12   7   32.74   46.01
 -10 -12  -7   17.28   25.58
  -7 -11  10   50.87   42.04
  10 -11   7   84.94   56.10
 -10 -11  -7   83.22   68.34
  -7 -10  10   85.64   55.92
  10 -10   7  164.13   87.00
 -10 -10  -7   76.57   57.29
  -7  -9  10  183.53   82.26
  10  -9   7   64.64   55.54
 -10  -9  -7   68.35   55.56
  10  -8   7   43.01   40.15
 -10  -8  -7   15.65   22.38
  -7  -7  10  107.21   60.32
 -10  -7  -7   46.97   40.38
  -7  -6  10   -1.72    9.69
 -10  -6  -7   63.29   45.37
 -10  -5  -7   10.19    8.24
  10  -5   7   97.82   55.11
   7  -4 -10   16.45   15.87
  10  -4   7   53.37   37.78
 -10  -4  -7    7.50   10.28
  -7  -3  10  207.93   78.44
  10  -3   7  204.77   80.24
 -10  -3  -7   17.87   17.22
 -10  -2  -7  229.42   74.32
  -7  -2  10  178.53   70.84
  10  -2   7  411.44  108.80
  10  -1   7  124.13   56.33
  -7  -1  10   42.68   34.97
  10  -1   7  124.93   58.26
 -10  -1  -7   22.11   19.91
  10   0   7   43.81   33.40
  -7   0  10  103.20   52.81
  10   0   7   49.46   42.48
 -10   0  -7   15.95   13.81
  10   1   7   18.32   21.46
  10   1   7   29.90   22.78
 -10   1  -7   79.07   35.86
  10   2   7  294.79  100.41
  -7   2  10  235.81   52.13
  10   2   7  425.32  106.76
 -10   2  -7  250.26   59.05
 -10   2  -7  462.56   79.89
  10   3   7   12.68   13.12
  10   3   7   38.73   37.64
  -7   3  10   74.24   32.79
  -7   4  10   35.42   27.35
  10   4   7    5.33    5.59
 -10   5  -7   68.42   43.41
  -7   5  10  123.91   55.28
  10   5   7   37.00   34.83
 -10   6  -7  321.38   96.17
  10   6   7  119.60   63.68
  -7   6  10  244.38   81.61
 -10   7  -7  234.25   90.27
  10   7   7   68.27   48.37
  -7   7  10  109.61   62.64
  10   8   7   36.64   36.62
 -10   8  -7   14.88   18.32
  -7   8  10    4.74   21.80
 -10   9  -7   25.21   25.74
  10   9   7  112.68   71.32
  -7   9  10   29.60   28.95
  -7  10  10   53.62   49.61
 -10  10  -7   94.20   64.79
  10  10   7  102.84   66.05
  -7  11  10  120.49   87.83
 -10  11  -7   68.27   58.64
  10  11   7   48.50   52.28
 -10  12  -7  -17.19   31.38
  -7  12  10   13.62   24.70
  10  12   7   40.89   56.17
 -10  13  -7    3.60   32.85
  -7  13  10   -4.03   14.74
  10  13   7   74.10   64.56
   7  13 -10  111.81   98.92
  -6 -13  10    3.94   17.35
  10 -13   6   68.95   51.37
   6 -13 -10   28.76   39.33
 -10 -13  -6   19.20   41.05
  -6 -12  10   20.96   22.78
   6 -12 -10   54.17   25.92
  10 -12   6   99.97   65.15
 -10 -12  -6   33.77   40.55
  -6 -11  10   98.91   61.92
  10 -11   6   27.99   50.56
   6 -11 -10   15.77   21.74
 -10 -11  -6   64.67   52.54
  -6 -10  10    9.32    7.26
  10 -10   6   10.08   20.98
 -10 -10  -6   -3.14   21.28
  -6  -9  10   65.83   46.93
  10  -9   6  123.59   73.92
 -10  -9  -6   63.69   61.17
  -6  -8  10   26.49   28.37
  10  -8   6   75.11   58.31
 -10  -8  -6   -8.91   23.86
  10  -7   6  102.36   68.03
 -10  -7  -6   30.74   35.86
  10  -6   6   13.33   27.08
 -10  -6  -6   37.18   33.99
  -6  -5  10  367.72  109.66
  10  -5   6  508.98  141.51
 -10  -5  -6   86.93   53.88
  -6  -4  10  151.81   63.97
  10  -4   6  146.21   66.16
 -10  -4  -6    4.25   13.80
  -6  -3  10   35.54   33.08
 -10  -3  -6   27.00   25.98
  10  -2   6   14.09   19.10
 -10  -2  -6   48.94   34.77
  10  -1   6   79.33   48.85
  -6  -1  10  282.01   84.10
 -10  -1  -6  261.27   74.69
  10  -1   6   66.46   44.55
  10   0   6   59.36   43.13
  -6   0  10   74.56   40.32
  10   0   6   59.36   42.05
 -10   0  -6   40.82   30.36
  10   1   6  424.37  105.73
 -10   1  -6   25.40   19.54
 -10   1  -6   54.09   23.72
  -6   1  10  118.95   37.12
  10   1   6  435.85   99.71
 -10   2  -6   10.61    9.83
  10   2   6   63.83   37.82
  10   2   6   49.49   38.11
 -10   2  -6    6.05   13.01
  -6   3  10  108.44   44.95
  10   3   6   45.70   35.41
 -10   3  -6  103.24   34.82
  10   3   6   55.10   42.12
 -10   3  -6  179.19   53.69
  -6   4  10   71.53   37.08
  10   4   6    9.09   13.40
  -6   5  10  107.96   50.32
  10   5   6   92.23   55.54
  10   6   6   38.16   42.82
 -10   6  -6   10.37   24.19
  10   7   6   34.70   25.88
 -10   7  -6   49.44   38.13
  -6   7  10   15.27   23.68
 -10   8  -6   84.50   58.04
  10   8   6   13.80   34.52
  -6   8  10   51.04   43.65
 -10   9  -6  127.45   76.88
  10   9   6   96.19   64.61
  -6   9  10   83.76   63.29
  -6  10  10   51.52   53.24
 -10  10  -6   19.92   32.25
  10  10   6   -5.97   15.43
  -6  11  10   52.38   53.26
 -10  11  -6   16.30   31.81
  10  11   6  119.26   78.23
 -10  12  -6   83.40   65.73
  -6  12  10   56.20   54.16
  10  12   6    8.05   32.15
   6  12 -10   50.92   62.45
 -10  13  -6   53.57   66.16
  -6  13  10   25.33   29.95
   6  13 -10   -1.97   16.02
  10  13   6   -3.06   21.42
  -5 -13  10   33.93   36.72
   5 -13 -10    3.33   12.32
 -10 -13  -5  -10.77   29.57
  -5 -12  10   31.49   30.94
  10 -12   5   53.38   59.02
   5 -12 -10   -1.39   28.97
 -10 -12  -5   34.64   49.54
  -5 -11  10   45.12   39.83
  10 -11   5   68.90   59.82
   5 -11 -10    0.18   27.15
 -10 -11  -5   -2.59    5.83
  -5 -10  10  103.23   57.44
  10 -10   5  143.41   79.55
 -10 -10  -5   87.61   66.16
  -5  -9  10  175.00   75.17
  10  -9   5  225.51   93.41
 -10  -9  -5  -20.51   35.41
  -5  -8  10   68.09   48.39
  10  -8   5   69.98   53.88
 -10  -8  -5   29.84   43.45
  -5  -7  10  178.75   80.22
  10  -7   5   61.31   46.27
 -10  -7  -5  128.70   74.41
  -5  -6  10  148.14   73.96
  10  -6   5  267.66  101.99
 -10  -6  -5  141.20   71.10
  10  -5   5  183.79   83.98
 -10  -5  -5    9.52   13.06
  -5  -4  10  258.41   81.42
  10  -4   5  290.89   98.46
 -10  -4  -5  136.55   62.56
  -5  -3  10  436.10  111.55
 -10  -3  -5  344.72   97.66
  10  -2   5   46.85   32.21
  -5  -2  10  117.47   53.70
 -10  -2  -5   76.83   44.81
  -5  -1  10  149.59   57.60
   5  -1 -10  679.73   55.49
  10  -1   5  430.48  104.33
 -10  -1  -5    6.40   12.75
  10   0   5   65.36   37.11
  -5   0  10  231.98   71.59
  10   0   5   93.95   49.62
 -10   0  -5   44.36   29.22
  -5   0  10  295.26   60.14
  10   1   5   19.34   23.81
  10   1   5    7.66   11.80
 -10   2  -5   31.79   23.35
  -5   2  10  106.32   41.24
  10   2   5   88.19   44.05
  10   2   5  101.35   48.97
 -10   2  -5   17.66   15.87
  10   3   5  412.46   98.72
  -5   3  10   15.29    8.70
 -10   3  -5   37.84   26.23
  10   3   5  494.24  116.51
 -10   3  -5    6.22    2.88
  -5   4  10  184.20   57.63
  10   4   5  109.94   55.93
 -10   4  -5  288.56   75.31
  10   5   5   39.16   35.49
 -10   5  -5  123.34   52.18
  10   6   5   97.36   55.08
  -5   6  10  301.05   94.55
 -10   6  -5  159.40   63.66
 -10   7  -5   68.38   42.13
  10   7   5   70.94   50.05
 -10   8  -5   63.02   48.52
  10   8   5   26.02   31.83
  -5   8  10  136.51   75.69
  10   9   5   -1.36   17.11
  -5   9  10   33.73   34.13
 -10  10  -5  100.37   74.49
  10  10   5  142.55   87.15
  -5  10  10  238.60  115.41
  -5  11  10   40.52   50.36
 -10  11  -5   31.76   41.41
  10  11   5   12.43   26.37
 -10  12  -5   64.98   53.67
  -5  12  10   47.31   63.24
   5  12 -10   30.96   41.04
  10  12   5   45.24   47.70
  10  13   5   -5.86   28.30
 -10  13  -5   58.53   58.55
  -5  13  10   -3.23   44.46
   5  13 -10   34.43   43.39
  -4 -14  10   41.20   43.52
   4 -14 -10    7.23   26.40
 -10 -14  -4   -6.46   22.75
  -4 -13  10    1.84   21.85
   4 -13 -10   98.97   63.39
  10 -13   4   35.48   23.16
 -10 -13  -4  111.24   85.04
  -4 -12  10    6.80   14.51
  10 -12   4   39.80   49.03
   4 -12 -10   93.58   63.41
 -10 -12  -4   49.72   59.25
  -4 -11  10   58.04   40.57
  10 -11   4   60.66   51.68
   4 -11 -10   70.33   47.74
 -10 -11  -4   33.82   36.58
  -4 -10  10   84.89   50.12
  10 -10   4   92.83   63.52
 -10 -10  -4  120.01   81.13
  -4  -9  10   16.14   18.57
  10  -9   4  110.63   70.81
 -10  -9  -4   69.08   59.79
  -4  -8  10   43.49   35.34
  10  -8   4  269.28  103.87
 -10  -8  -4  330.97  125.76
  -4  -7  10   42.17   36.36
  10  -7   4  109.94   70.28
 -10  -7  -4   34.27   39.01
  -4  -6  10  104.26   55.46
  10  -6   4    5.80   30.22
 -10  -6  -4  182.35   82.55
  -4  -5  10  231.77   77.90
 -10  -5  -4   88.77   55.52
  10  -4   4  480.26  129.93
 -10  -4  -4  691.53  146.90
  -4  -3  10  154.52   60.14
  10  -3   4   94.49   49.27
 -10  -3  -4   86.95   55.39
  -4  -2  10  131.87   52.97
  10  -2   4  331.22   92.76
 -10  -2  -4  200.26   73.89
  -4  -1  10   87.98   41.62
  10  -1   4  241.25   59.30
  10  -1   4  324.56   88.75
   4  -1 -10   50.59   14.64
 -10  -1  -4   -0.83   10.71
  10   0   4  404.98   65.90
  10   0   4  724.39  134.04
 -10   0  -4  554.48  104.06
  10   0   4  678.71  118.16
  10   1   4   -6.97   16.72
  10   1   4   -0.21    4.42
  10   1   4   16.76   23.50
  10   2   4  246.94   76.14
 -10   2  -4  314.77   62.63
  10   2   4  254.16   76.32
 -10   2  -4  395.05   79.56
 -10   3  -4   32.08   14.79
  -4   3  10  175.04   61.47
  10   3   4  136.75   51.60
  10   3   4  171.34   65.30
 -10   3  -4  127.65   48.31
  10   4   4  596.02  118.76
 -10   4  -4  418.86   93.46
  10   5   4   88.51   49.01
  -4   5  10  243.83   84.09
 -10   5  -4  314.98   85.52
  -4   6  10  157.52   72.16
 -10   6  -4   18.67   23.06
  10   6   4  187.68   75.60
 -10   7  -4   61.59   43.30
  -4   7  10  161.50   72.54
  10   7   4   54.61   45.00
  10   8   4  259.07   92.46
  -4   8  10   51.94   44.86
 -10   8  -4  212.83   87.74
 -10   9  -4   93.22   55.77
  10   9   4   28.10   29.35
 -10  10  -4   80.22   55.55
  10  10   4   81.36   59.24
  -4  10  10  113.80   81.31
  10  11   4   14.80    7.71
  -4  11  10   84.59   74.15
 -10  11  -4   47.55   44.90
  10  12   4   46.62   58.56
  -4  12  10  114.93   91.58
 -10  12  -4   16.53   24.78
   4  12 -10   46.75   60.80
  10  13   4   97.23   76.45
 -10  13  -4   17.02   34.44
   4  13 -10  -14.04   38.67
 -10  14  -4  106.16   74.76
  10  14   4   -1.76   40.06
  -4  14  10   -6.54   41.20
   4  14 -10   39.56   53.47
  -3 -14  10  106.16   64.60
  10 -14   3   39.17   50.80
   3 -14 -10   -0.43   17.43
 -10 -14  -3   16.87   43.65
  -3 -13  10  137.17   72.19
   3 -13 -10   20.67   34.55
  10 -13   3   99.45   69.98
 -10 -13  -3    2.43   27.18
  -3 -12  10    4.80    7.38
   3 -12 -10   44.45   43.74
  10 -12   3   43.52   40.03
 -10 -12  -3    1.64   12.67
  -3 -11  10   30.69   33.71
  10 -11   3   38.39   45.09
 -10 -11  -3   25.81   42.94
   3 -10 -10   54.74   47.02
  10 -10   3   31.65   47.26
 -10 -10  -3   18.71   24.81
  -3  -9  10   58.57   39.42
  10  -9   3   95.90   57.22
 -10  -9  -3   30.75   35.03
  -3  -8  10   33.13   31.36
  10  -8   3  121.91   68.59
 -10  -8  -3  177.95   89.40
  -3  -7  10  113.32   59.04
  10  -7   3   77.90   50.11
  10  -6   3   31.66   29.85
 -10  -6  -3   -5.68   29.54
  -3  -5  10   34.05   24.13
 -10  -5  -3    1.40   18.93
  -3  -4  10  201.22   72.77
  10  -4   3  184.50   81.75
 -10  -4  -3  294.50   92.86
  -3  -3  10  145.57   59.54
  10  -3   3   35.92   34.70
  -3  -2  10    8.32   14.98
  10  -2   3   15.76   19.89
   3  -2 -10   47.57   18.48
 -10  -2  -3   63.15   42.01
  10  -1   3  297.30   67.91
  10  -1   3  394.93   92.61
   3  -1 -10  370.54   44.70
  10  -1   3  328.26   69.52
  -3  -1  10  346.26   73.93
  10   0   3  151.66   42.81
   3   0 -10  143.67   21.45
  10   0   3  225.24   71.47
 -10   0  -3  199.08   59.76
  10   0   3  208.52   63.75
  -3   0  10  141.99   46.06
  -3   1  10  385.12   82.67
  10   1   3   47.15   25.26
  10   1   3   42.17   20.16
 -10   1  -3  412.84   76.73
  10   1   3   89.16   45.75
 -10   2  -3    6.14    3.02
  10   2   3   59.38   21.85
  10   2   3   81.78   41.23
  10   2   3   75.07   42.43
  -3   2  10   26.81   21.00
 -10   3  -3   25.61   23.00
  10   3   3  630.41   59.31
  10   3   3  842.72  127.13
 -10   3  -3   10.22    7.35
  -3   3  10  201.26   65.59
  10   3   3 1103.56  157.69
  10   4   3  206.14   66.76
  -3   4  10  143.17   57.02
  10   4   3  151.32   30.84
 -10   4  -3  110.76   51.42
 -10   5  -3  108.86   51.75
  10   5   3    3.83   14.80
 -10   6  -3   20.54   28.56
  10   6   3   11.86   17.03
  -3   6  10   11.58   19.39
 -10   7  -3   65.78   47.08
  -3   7  10  215.70   90.92
  10   7   3  260.53   83.32
 -10   8  -3  119.54   63.61
  -3   8  10   51.38   44.74
  10   8   3  137.94   65.58
 -10   9  -3   41.81   33.84
  10   9   3   16.11   23.97
  10  10   3    2.00   17.90
 -10  10  -3   12.95   26.17
  -3  10  10   54.94   60.15
  10  11   3    1.43   18.31
 -10  11  -3   35.51   37.06
   3  11 -10   24.24   40.50
  -3  12  10  102.29   85.64
 -10  12  -3   84.90   62.01
   3  12 -10  -19.96   48.06
  10  12   3   27.62   45.49
  -3  13  10   73.52   71.34
 -10  13  -3   80.84   57.54
  10  13   3   29.37   53.45
   3  13 -10  204.79  118.04
 -10  14  -3    0.34   12.45
  -3  14  10   10.01   56.47
  10  14   3   35.83   44.47
  -2 -14  10   10.27   14.33
   2 -14 -10   -0.71   24.22
  10 -14   2   25.05   39.89
 -10 -14  -2   58.08   59.00
   2 -13 -10   37.51   46.51
  -2 -13  10   10.61   19.91
  10 -13   2   79.11   63.86
 -10 -13  -2    9.63   22.56
   2 -12 -10   56.19   47.81
  -2 -12  10   27.95   22.28
  10 -12   2   83.05   62.36
 -10 -12  -2   76.43   67.32
  -2 -11  10  130.69   65.31
  10 -11   2   -5.56    9.30
   2 -11 -10   50.50   45.32
 -10 -11  -2  185.04   92.40
  -2 -10  10   96.32   51.49
  10 -10   2   93.89   67.65
 -10 -10  -2   73.68   63.35
   2 -10 -10  120.70   66.60
  -2  -9  10   38.23   36.02
  10  -9   2   25.45   31.75
  -2  -8  10  200.10   77.68
 -10  -8  -2   16.41   22.79
  -2  -7  10  264.60   84.26
  -2  -7  10  250.19   57.97
  10  -7   2   35.80   26.61
 -10  -7  -2   28.73   34.86
  -2  -6  10  241.34   75.99
  -2  -6  10  299.98   54.91
  10  -6   2   92.59   56.47
 -10  -6  -2   10.14   21.06
  -2  -5  10  142.64   58.46
  10  -5   2  278.41   98.74
  -2  -5  10   91.71   20.22
 -10  -5  -2  290.16   95.54
  -2  -4  10   42.34   33.82
 -10  -4  -2    6.66   23.93
  -2  -3  10   30.01   25.41
  10  -3   2  499.15  121.86
  10  -3   2  336.36   49.33
 -10  -3  -2   78.87   43.73
  -2  -2  10  607.18  108.59
  10  -2   2  114.73   52.63
   2  -2 -10  544.62   65.14
  10  -2   2   87.01   30.52
 -10  -2  -2  170.54   63.74
   2  -1 -10   72.73   21.01
  10  -1   2   80.14   43.05
  10  -1   2   75.52   34.42
  10   0   2   25.05   19.49
  10   0   2   32.94   25.82
  10   0   2   37.16   23.65
   2   0 -10   88.12   22.82
  -2   0  10   85.48   40.44
 -10   0  -2   47.20   27.31
   2   1 -10  127.06   21.96
  10   1   2  873.08  139.29
  -2   1  10   70.95   37.95
 -10   1  -2   89.93   33.56
  10   1   2  753.86  107.44
  10   1   2  742.58   96.63
  10   2   2  143.92   50.36
  10   2   2  142.29   52.38
  10   2   2  127.91   34.26
 -10   2  -2  113.77   31.23
  -2   3  10    5.30    7.49
  10   3   2   60.65   33.35
  10   3   2   82.33   40.17
  10   3   2   70.57   25.07
  -2   4  10  113.47   51.71
 -10   4  -2  156.74   58.86
  10   4   2   10.14   12.65
  10   4   2   13.42   11.29
  10   5   2  270.75   81.24
 -10   5  -2  293.12   84.56
  -2   5  10  100.80   56.35
  10   6   2    4.29    8.97
  10   6   2    0.59    5.22
 -10   7  -2   57.87   44.51
  10   7   2   24.70   13.90
  10   7   2   19.01   25.41
  -2   8  10  518.37  149.79
 -10   8  -2  405.43  114.66
 -10   9  -2   43.86   40.33
  -2   9  10   98.68   65.87
  10   9   2  233.32   93.72
 -10  10  -2   67.98   51.03
  10  10   2  100.56   68.71
  -2  10  10  164.12   92.40
   2  10 -10  154.05   96.33
 -10  11  -2   13.46   31.48
  10  11   2  155.25   88.73
  -2  11  10   59.35   61.74
   2  11 -10  165.57   93.33
 -10  12  -2   44.25   42.06
  10  12   2   31.18   21.13
   2  12 -10   27.22   32.33
  -2  12  10   80.54   73.00
  -2  13  10   25.85   46.05
 -10  13  -2   88.93   69.87
  10  13   2   43.99   44.19
   2  13 -10   -6.50   37.72
  -2  14  10   34.01   39.23
 -10  14  -2   10.58   30.79
  10  14   2   94.66   79.23
   2  14 -10   13.80   34.81
  -1 -14  10   34.74   37.59
   1 -14 -10  193.99  101.00
  10 -14   1   26.06   38.94
 -10 -14  -1   82.73   77.07
  -1 -13  10   27.00   26.71
  10 -13   1    8.23   13.10
   1 -13 -10   17.33   28.53
  -1 -12  10   -6.84   17.81
  10 -12   1   83.46   61.02
   1 -12 -10   44.76   43.58
 -10 -12  -1   61.91   59.36
  -1 -11  10   48.31   44.20
   1 -11 -10   20.16   34.06
 -10 -11  -1   57.53   46.45
   1 -10 -10  212.84   93.60
  -1 -10  10   51.16   44.67
  10 -10   1  456.25  138.69
 -10 -10  -1  502.06  149.34
  -1  -9  10  390.15  110.41
  -1  -9  10  346.72   88.00
  10  -9   1    6.60   28.35
   1  -9 -10   14.01   32.85
 -10  -9  -1  131.05   74.38
  -1  -8  10   23.06    9.16
  10  -8   1   14.20   25.05
  -1  -8  10   27.84   21.82
  -1  -7  10  229.05   75.07
  -1  -7  10  223.11   58.64
  10  -7   1  127.19   60.35
 -10  -7  -1   54.93   47.83
  -1  -6  10  137.13   56.44
  -1  -6  10  144.26   42.46
  -1  -5  10  591.92  115.91
  10  -5   1  252.53   93.95
  -1  -5  10  535.50   66.17
 -10  -5  -1  164.83   76.83
  -1  -4  10   46.12   29.67
  10  -4   1   79.08   52.53
  10  -4   1   63.76   18.31
 -10  -4  -1  151.75   69.80
  -1  -4  10   58.08   19.58
  -1  -3  10  326.97   77.58
  10  -3   1  383.31   56.11
  10  -2   1  650.79  122.07
  10  -2   1  466.80   71.86
 -10  -2  -1  494.72  102.65
  10  -1   1  174.50   60.34
   1  -1 -10  400.39   55.06
 -10  -1  -1  210.43   60.16
  -1  -1  10  483.81   92.30
  -1   0  10  178.09   60.62
 -10   0  -1   50.05   28.80
   1   0 -10  195.46   42.12
  10   0   1   43.85   23.96
  10   1   1  282.92   76.70
  10   1   1  214.96   53.38
 -10   1  -1  138.42   41.47
  10   1   1  242.27   59.69
  10   2   1  538.24   91.10
  10   2   1  527.33   97.72
  10   2   1  513.78   79.11
 -10   2  -1  609.44   73.92
  10   3   1   50.06   26.83
  10   3   1   64.41   37.08
  10   3   1   64.06   27.58
  10   4   1  109.39   44.13
[truncated: 196,156 more chars]
